# Supplementary material
Source: publisher site journal article supplement (https://www.dovepress.com/get_supplementary_file.php?f=222608.xlsx)
Supplement: Supplementary file 1 [file get_supplementary_file.php]

## Sheet: GSE9452
ID	adj.P.Val	P.Value	t	B	logFC	Gene.symbol	Gene.title
202953_at	6e-05	1.22e-09	9.1	11.6354	2.61	C1QB	complement C1q B chain
204122_at	6e-05	2.35e-09	8.81	11.0651	2.14	TYROBP	TYRO protein tyrosine kinase binding protein
223922_x_at	6e-05	4.11e-09	8.56	10.5711	1.57	MS4A6A	membrane spanning 4-domains A6A
223620_at	6e-05	4.39e-09	8.53	10.5131	2.47	GPR34	G protein-coupled receptor 34
214560_at	6.79e-05	6.92e-09	8.34	10.1098	1.5	FPR3	formyl peptide receptor 3
218232_at	6.79e-05	7.45e-09	8.31	10.0444	2.16	C1QA	complement C1q A chain
219607_s_at	7.89e-05	1.2e-08	8.1	9.6192	2.76	MS4A4A	membrane spanning 4-domains A4A
1554899_s_at	7.89e-05	1.22e-08	8.1	9.60835	2.6	FCER1G	Fc fragment of IgE receptor Ig
204232_at	7.89e-05	1.3e-08	8.07	9.55029	2.4	FCER1G	Fc fragment of IgE receptor Ig
224356_x_at	7.92e-05	1.45e-08	8.02	9.45328	1.75	MS4A6A	membrane spanning 4-domains A6A
225353_s_at	9.06e-05	1.9e-08	7.91	9.20855	2.26	C1QC	complement C1q C chain
203641_s_at	9.06e-05	1.99e-08	7.89	9.16999	0.826	COBLL1	cordon-bleu WH2 repeat protein like 1
205498_at	9.67e-05	2.3e-08	-7.83	9.03965	-3.28	GHR	growth hormone receptor
230422_at	0.0003424	8.77e-08	7.28	7.83488	1.55	FPR3	formyl peptide receptor 3
211644_x_at	0.000471	1.37e-07	7.1	7.43028	3.31	IGK///IGKC	immunoglobulin kappa locus///immunoglobulin kappa constant
225647_s_at	0.000471	1.38e-07	7.1	7.42409	1.91	CTSC	cathepsin C
209727_at	0.000471	1.46e-07	7.07	7.37017	0.773	GM2A	GM2 ganglioside activator
223344_s_at	0.0004903	1.61e-07	7.03	7.28186	1.85	MS4A7	membrane spanning 4-domains A7
201847_at	0.0005879	2.04e-07	6.94	7.06768	1.67	LIPA	lipase A, lysosomal acid type
223280_x_at	0.0007764	2.87e-07	6.81	6.75818	1.47	MS4A6A	membrane spanning 4-domains A6A
210510_s_at	0.0007764	3.11e-07	6.77	6.68629	0.822	NRP1	neuropilin 1
224561_s_at	0.0007764	3.12e-07	6.77	6.68099	0.458	MORF4L1	mortality factor 4 like 1
224795_x_at	0.0007766	3.32e-07	6.75	6.62608	0.93	IGK///IGKC	immunoglobulin kappa locus///immunoglobulin kappa constant
223343_at	0.0007766	3.41e-07	6.74	6.60148	1.46	MS4A7	membrane spanning 4-domains A7
207277_at	0.0008004	3.66e-07	6.71	6.53673	1.42	CD209	CD209 molecule
223064_at	0.0008402	4.01e-07	6.67	6.45365	0.498	RNF181	ring finger protein 181
203104_at	0.0008402	4.24e-07	6.65	6.40325	1.31	CSF1R	colony stimulating factor 1 receptor
209901_x_at	0.0008402	4.3e-07	6.65	6.38899	1.64	AIF1	allograft inflammatory factor 1
223001_at	0.0008541	4.53e-07	6.63	6.342	0.767	OSTC	oligosaccharyltransferase complex non-catalytic subunit
221671_x_at	0.0009575	5.25e-07	6.57	6.2066	1	IGK///IGKC	immunoglobulin kappa locus///immunoglobulin kappa constant
219666_at	0.0009804	5.65e-07	6.54	6.13939	1.42	MS4A6A	membrane spanning 4-domains A6A
225704_at	0.0009804	5.92e-07	-6.52	6.09762	-1.13	FBRSL1	fibrosin like 1
200838_at	0.0009804	5.93e-07	6.52	6.09518	1.35	CTSB	cathepsin B
221651_x_at	0.0009804	6.25e-07	6.5	6.0473	1.03	IGK///IGKC	immunoglobulin kappa locus///immunoglobulin kappa constant
228598_at	0.0009804	6.28e-07	-6.5	6.04404	-1.24	DPP10	dipeptidyl peptidase like 10
200604_s_at	0.0010669	7.02e-07	6.45	5.94087	1.02	PRKAR1A	protein kinase cAMP-dependent type I regulatory subunit alpha
1555728_a_at	0.0011028	7.77e-07	6.41	5.84818	1.82	MS4A4A	membrane spanning 4-domains A4A
201166_s_at	0.0011028	7.82e-07	-6.41	5.84316	-0.411	PUM1	pumilio RNA binding family member 1
226818_at	0.0011028	7.96e-07	6.4	5.82629	1.98	MPEG1	macrophage expressed 1
201364_s_at	0.0011028	8.07e-07	6.4	5.81407	0.736	OAZ2	ornithine decarboxylase antizyme 2
213095_x_at	0.0011217	8.41e-07	6.38	5.7759	1.39	AIF1	allograft inflammatory factor 1
211991_s_at	0.0011441	8.79e-07	6.37	5.73572	2.37	HLA-DPA1	major histocompatibility complex, class II, DP alpha 1
215051_x_at	0.0012993	1.02e-06	6.31	5.59751	1.46	AIF1	allograft inflammatory factor 1
212771_at	0.0013002	1.05e-06	-6.3	5.57585	-0.854	FAM171A1	family with sequence similarity 171 member A1
211766_s_at	0.0013065	1.1e-06	-6.28	5.53305	-3.42	PNLIPRP2	pancreatic lipase related protein 2 (gene/pseudogene)
209658_at	0.0013065	1.15e-06	-6.26	5.4887	-0.451	CDC16	cell division cycle 16
202595_s_at	0.0013065	1.18e-06	6.25	5.46332	0.658	LEPROTL1	leptin receptor overlapping transcript-like 1
211645_x_at	0.0013065	1.19e-06	6.25	5.46	3.24
232403_at	0.0013065	1.19e-06	6.25	5.45846	0.588	SPG11	spastic paraplegia 11 (autosomal recessive)
201141_at	0.0013065	1.19e-06	6.25	5.45412	1.94	GPNMB	glycoprotein nmb
215176_x_at	0.0013264	1.24e-06	6.23	5.42206	2.82	IGK///IGKC	immunoglobulin kappa locus///immunoglobulin kappa constant
224637_at	0.0014075	1.34e-06	6.2	5.34978	0.557	OST4	oligosaccharyltransferase complex subunit 4, non-catalytic
216207_x_at	0.0014772	1.47e-06	6.17	5.26659	2.81	IGKC	immunoglobulin kappa constant
214836_x_at	0.0014772	1.5e-06	6.16	5.24649	1.42	IGK///IGKC	immunoglobulin kappa locus///immunoglobulin kappa constant
236248_x_at	0.0014772	1.51e-06	-6.16	5.2389	-0.587	TADA2B	transcriptional adaptor 2B
200736_s_at	0.0014772	1.51e-06	6.16	5.23679	0.588	GPX1	glutathione peroxidase 1
231835_at	0.0014772	1.54e-06	-6.15	5.22034	-0.727	FAM213B	family with sequence similarity 213 member B
216576_x_at	0.0014772	1.57e-06	6.14	5.20167	3.22	IGK///IGKC	immunoglobulin kappa locus///immunoglobulin kappa constant
217480_x_at	0.0014772	1.61e-06	6.13	5.1829	2.62	IGKV1OR2-118	immunoglobulin kappa variable 1/OR2-118 (pseudogene)
200622_x_at	0.0014772	1.62e-06	6.13	5.17397	0.918	CALM3///CALM2///CALM1	calmodulin 3///calmodulin 2///calmodulin 1
202296_s_at	0.001508	1.7e-06	6.11	5.12833	0.446	RER1	retention in endoplasmic reticulum sorting receptor 1
203038_at	0.001508	1.72e-06	-6.11	5.11895	-0.496	PTPRK	protein tyrosine phosphatase, receptor type K
216401_x_at	0.001508	1.74e-06	6.1	5.11014	2.79	MLIP	muscular LMNA-interacting protein
214965_at	0.0015448	1.81e-06	-6.09	5.07355	-0.536	SPATA2L	spermatogenesis associated 2 like
205910_s_at	0.0015502	1.84e-06	-6.08	5.05606	-0.493	CEL	carboxyl ester lipase
1568596_a_at	0.0015727	1.9e-06	6.07	5.02592	0.515	TROAP	trophinin associated protein
200744_s_at	0.0015727	1.93e-06	6.06	5.01497	0.553	GNB1	G protein subunit beta 1
226154_at	0.0015777	1.96e-06	-6.06	4.99842	-0.639	DNM1L	dynamin 1 like
218742_at	0.0017278	2.19e-06	-6.01	4.89762	-0.515	NARFL	nuclear prelamin A recognition factor like
218117_at	0.0017278	2.24e-06	6	4.87537	0.415	RBX1	ring-box 1
201399_s_at	0.0017278	2.24e-06	6	4.87514	0.954	TRAM1	translocation associated membrane protein 1
225824_at	0.0017519	2.31e-06	-5.99	4.8495	-0.346	CCNK	cyclin K
1557915_s_at	0.0017668	2.36e-06	5.99	4.82903	0.655	GSTO1	glutathione S-transferase omega 1
229232_at	0.0017968	2.45e-06	-5.97	4.79476	-0.943	LRRC57	leucine rich repeat containing 57
211643_x_at	0.0017968	2.48e-06	5.97	4.78403	3.3	IGK///IGKC	immunoglobulin kappa locus///immunoglobulin kappa constant
204327_s_at	0.0017968	2.51e-06	-5.96	4.77276	-0.924	ZNF202	zinc finger protein 202
213233_s_at	0.0017968	2.54e-06	-5.96	4.76053	-0.539	KLHL9	kelch like family member 9
213020_at	0.0017968	2.56e-06	-5.95	4.7526	-0.632	GOSR1	golgi SNAP receptor complex member 1
1567628_at	0.0018013	2.6e-06	5.95	4.73783	2.37	CD74	CD74 molecule
214768_x_at	0.0018013	2.64e-06	5.94	4.72699	3.37	IGKC	immunoglobulin kappa constant
203551_s_at	0.0018671	2.77e-06	-5.92	4.68252	-0.588	COX11	COX11, cytochrome c oxidase copper chaperone
224616_at	0.0019301	2.92e-06	-5.9	4.63294	-0.465	DYNC1LI2	dynein cytoplasmic 1 light intermediate chain 2
216565_x_at	0.0019301	2.93e-06	5.9	4.62948	1.1
201264_at	0.002009	3.09e-06	5.88	4.58158	0.509	COPE	coatomer protein complex subunit epsilon
215910_s_at	0.0020771	3.23e-06	5.87	4.53995	0.825	FNDC3A	fibronectin type III domain containing 3A
231628_s_at	0.0020953	3.31e-06	-5.86	4.51673	-1.69	SERPINB6	serpin family B member 6
217378_x_at	0.0020953	3.33e-06	5.85	4.51051	2.63	IGKV1OR2-108	immunoglobulin kappa variable 1/OR2-108 (non-functional)
239563_at	0.0020972	3.42e-06	-5.84	4.48645	-0.302
222760_at	0.0020972	3.47e-06	-5.84	4.47398	-0.855	ZNF703	zinc finger protein 703
239866_at	0.0020972	3.51e-06	-5.83	4.46328	-0.798
227063_at	0.0020972	3.52e-06	5.83	4.45991	0.538	TMEM256	transmembrane protein 256
214777_at	0.0020972	3.53e-06	5.83	4.45819	3.25	IGKC	immunoglobulin kappa constant
213187_x_at	0.0021598	3.67e-06	5.82	4.42112	0.512	FTL	ferritin light chain
229167_at	0.0023401	4.02e-06	-5.78	4.33737	-0.712	PURA	purine rich element binding protein A
212556_at	0.0023449	4.07e-06	-5.78	4.32573	-0.649	SCRIB	scribbled planar cell polarity protein
62212_at	0.0024379	4.28e-06	-5.76	4.2802	-0.5	LOC100129924///C1orf50	uncharacterized LOC100129924///chromosome 1 open reading frame 50
234952_s_at	0.0025111	4.5e-06	-5.74	4.2348	-0.325	PHRF1	PHD and ring finger domains 1
218968_s_at	0.0025111	4.5e-06	-5.74	4.23392	-0.486	ZFP64	ZFP64 zinc finger protein
204438_at	0.0025254	4.57e-06	5.73	4.21932	2.04	MRC1	mannose receptor, C type 1
204372_s_at	0.0025801	4.72e-06	-5.72	4.19026	-0.429	KHSRP	KH-type splicing regulatory protein
217157_x_at	0.0027628	5.1e-06	5.69	4.11801	2.33	IGK///IGKC	immunoglobulin kappa locus///immunoglobulin kappa constant
213720_s_at	0.0027716	5.2e-06	-5.68	4.09986	-0.581	SMARCA4	SWI/SNF related, matrix associated, actin dependent regulator of chromatin, subfamily a, member 4
228433_at	0.0027716	5.22e-06	-5.68	4.09697	-0.653	NFYA	nuclear transcription factor Y subunit alpha
203791_at	0.0027815	5.29e-06	-5.68	4.08478	-0.6	DMXL1	Dmx like 1
34225_at	0.002817	5.41e-06	-5.67	4.06422	-0.427	MIR943///NELFA	microRNA 943///negative elongation factor complex member A
210982_s_at	0.0028383	5.5e-06	5.66	4.04855	2.44	HLA-DRA	major histocompatibility complex, class II, DR alpha
201422_at	0.0029501	5.77e-06	5.64	4.00422	1.52	IFI30///PIK3R2	IFI30, lysosomal thiol reductase///phosphoinositide-3-kinase regulatory subunit 2
233177_s_at	0.0030074	5.94e-06	-5.63	3.97789	-0.901	PNKD	paroxysmal nonkinesigenic dyskinesia
229342_at	0.0031463	6.31e-06	-5.61	3.92247	-0.786	NCBP3	nuclear cap binding subunit 3
203707_at	0.0031463	6.33e-06	-5.61	3.91927	-0.593	LINC00921///ZNF263	long intergenic non-protein coding RNA 921///zinc finger protein 263
229801_at	0.0032054	6.51e-06	-5.6	3.89374	-0.547	PROSER2	proline and serine rich 2
201858_s_at	0.0032844	6.73e-06	5.59	3.86299	2.43	SRGN	serglycin
216210_x_at	0.0032971	6.81e-06	-5.58	3.85123	-0.472	TRIOBP	TRIO and F-actin binding protein
226602_s_at	0.0033021	6.89e-06	-5.58	3.84167	-0.779	BCR	BCR, RhoGEF and GTPase activating protein
201498_at	0.0034277	7.21e-06	-5.56	3.79916	-0.595	USP7	ubiquitin specific peptidase 7
212407_at	0.0034457	7.31e-06	-5.55	3.78632	-0.685	METTL13	methyltransferase like 13
201840_at	0.0034526	7.39e-06	5.55	3.77656	0.346	NEDD8	neural precursor cell expressed, developmentally down-regulated 8
208670_s_at	0.0034673	7.48e-06	5.55	3.76478	0.549	EID1	EP300 interacting inhibitor of differentiation 1
204638_at	0.0035328	7.69e-06	5.54	3.7397	1.4	ACP5	acid phosphatase 5, tartrate resistant
229861_at	0.0035522	7.8e-06	-5.53	3.7269	-0.605	LIG3	DNA ligase 3
232938_at	0.0035788	8.01e-06	5.52	3.7022	0.344	SFMBT2	Scm-like with four mbt domains 2
225528_at	0.0035788	8.03e-06	-5.52	3.69942	-0.4	IPO8	importin 8
226826_at	0.0035788	8.05e-06	-5.52	3.6972	-1.05	LSM11	LSM11, U7 small nuclear RNA associated
227400_at	0.0036165	8.2e-06	-5.51	3.68005	-0.52	NFIX	nuclear factor I X
202757_at	0.0036183	8.27e-06	-5.51	3.67217	-0.522	NELFB	negative elongation factor complex member B
204275_at	0.0037336	8.6e-06	-5.49	3.63582	-0.756	CAPN15	calpain 15
211654_x_at	0.0037358	8.7e-06	5.49	3.62576	2.18	HLA-DQB1	major histocompatibility complex, class II, DQ beta 1
202062_s_at	0.0037358	8.75e-06	5.49	3.62074	0.87	SEL1L	SEL1L ERAD E3 ligase adaptor subunit
203866_at	0.0038126	9e-06	-5.48	3.59475	-0.365	NLE1	notchless homolog 1
1558487_a_at	0.003822	9.14e-06	-5.47	3.58011	-0.561	TMED4	transmembrane p24 trafficking protein 4
224334_s_at	0.003822	9.16e-06	5.47	3.57788	0.463	MRPL51///SPTLC1	mitochondrial ribosomal protein L51///serine palmitoyltransferase long chain base subunit 1
205417_s_at	0.003822	9.23e-06	-5.47	3.57122	-0.264	DAG1	dystroglycan 1
213034_at	0.0038284	9.31e-06	-5.46	3.56272	-0.649	SIK3	SIK family kinase 3
208894_at	0.0038349	9.41e-06	5.46	3.5533	2.31	HLA-DRA	major histocompatibility complex, class II, DR alpha
201760_s_at	0.0038349	9.47e-06	-5.46	3.54736	-0.553	WSB2	WD repeat and SOCS box containing 2
230051_at	0.0038692	9.63e-06	-5.45	3.53137	-0.759	PROSER2	proline and serine rich 2
32091_at	0.0038692	9.7e-06	-5.45	3.52553	-0.504	SLC25A44	solute carrier family 25 member 44
222673_x_at	0.0038721	9.77e-06	-5.45	3.51812	-0.706	FAM122B	family with sequence similarity 122B
201487_at	0.0039047	9.93e-06	5.44	3.5037	1.25	CTSC	cathepsin C
231070_at	0.0039353	1.01e-05	-5.43	3.48986	-0.699	IYD	iodotyrosine deiodinase
1559249_at	0.0040322	1.04e-05	5.42	3.4608	0.692	ATXN1	ataxin 1
1553530_a_at	0.0040467	1.07e-05	5.41	3.43034	0.612	ITGB1	integrin subunit beta 1
213064_at	0.0040467	1.08e-05	-5.41	3.4267	-0.657	ZC3H14	zinc finger CCCH-type containing 14
202243_s_at	0.0040467	1.08e-05	5.41	3.42216	0.387	PSMB4	proteasome subunit beta 4
242463_x_at	0.0040467	1.09e-05	-5.41	3.42134	-0.926	ZNF600	zinc finger protein 600
1561567_at	0.0040467	1.09e-05	-5.4	3.41964	-0.249	LOC101928491	uncharacterized LOC101928491
210910_s_at	0.0040467	1.1e-05	-5.4	3.41093	-1.53	POMZP3	POM121 and ZP3 fusion
215399_s_at	0.0040467	1.11e-05	5.4	3.40424	0.315	OS9	OS9, endoplasmic reticulum lectin
206214_at	0.0040467	1.11e-05	5.4	3.4011	1.98	PLA2G7	phospholipase A2 group VII
201997_s_at	0.0040467	1.11e-05	-5.4	3.40029	-0.474	SPEN	spen family transcriptional repressor
212888_at	0.0040706	1.12e-05	-5.39	3.38871	-0.469	DICER1	dicer 1, ribonuclease III
224571_at	0.0040714	1.13e-05	-5.39	3.38244	-0.995	IRF2BP2	interferon regulatory factor 2 binding protein 2
226841_at	0.0040742	1.14e-05	5.39	3.37574	1.61	MPEG1	macrophage expressed 1
202230_s_at	0.0041167	1.16e-05	-5.38	3.36012	-0.75	CHERP	calcium homeostasis endoplasmic reticulum protein
223744_s_at	0.0041376	1.17e-05	-5.38	3.34896	-2.68	SIAE	sialic acid acetylesterase
239188_at	0.0041376	1.18e-05	5.37	3.34352	0.399	PPP2R3C	protein phosphatase 2 regulatory subunit B''gamma
210470_x_at	0.0041834	1.21e-05	5.37	3.322	0.557	NONO	non-POU domain containing, octamer-binding
222490_at	0.0041834	1.21e-05	-5.36	3.32157	-0.697	LOC101060521///POLR3E	DNA-directed RNA polymerase III subunit RPC5///RNA polymerase III subunit E
242245_at	0.0041836	1.23e-05	-5.36	3.30716	-0.884
214512_s_at	0.0041836	1.23e-05	5.36	3.30603	0.769	SUB1	SUB1 homolog, transcriptional regulator
206584_at	0.0041836	1.23e-05	5.36	3.30414	2.56	LY96	lymphocyte antigen 96
215891_s_at	0.0043069	1.28e-05	5.34	3.27155	0.94	GM2A	GM2 ganglioside activator
211908_x_at	0.0043273	1.29e-05	5.34	3.26148	2.29	IGK	immunoglobulin kappa locus
228376_at	0.004338	1.3e-05	5.34	3.25354	0.884	GGTA1P	glycoprotein, alpha-galactosyltransferase 1 pseudogene
204087_s_at	0.0044761	1.36e-05	-5.32	3.21252	-0.812	SLC5A6	solute carrier family 5 member 6
229356_x_at	0.0044761	1.36e-05	-5.32	3.21089	-0.433	INO80	INO80 complex subunit
219192_at	0.0044761	1.37e-05	-5.32	3.2078	-0.718	UBAP2	ubiquitin associated protein 2
221798_x_at	0.0045378	1.4e-05	-5.31	3.18385	-0.257
214193_s_at	0.0045378	1.41e-05	-5.31	3.17933	-0.785	DIEXF	digestive organ expansion factor homolog (zebrafish)
212118_at	0.0045378	1.42e-05	-5.31	3.17597	-0.628	TRIM27	tripartite motif containing 27
200824_at	0.0045378	1.42e-05	5.3	3.17223	0.478	GSTP1	glutathione S-transferase pi 1
238988_at	0.0045378	1.43e-05	5.3	3.16595	0.93
215193_x_at	0.0045378	1.44e-05	5.3	3.16251	1.78	LOC101060835///LOC100996809///HLA-DRB4///HLA-DRB3///HLA-DRB1///HLA-DQB1	HLA class II histocompatibility antigen, DQ beta 1 chain-like///HLA class II histocompatibility antigen, DRB1-10 beta chain-like///major histocompatibility complex, class II, DR beta 4///major histocompatibility complex, class II, DR beta 3///major histocompatibility complex, class II, DR beta 1///major histocompatibility complex, class II, DQ beta 1
225296_at	0.0046309	1.47e-05	-5.29	3.13828	-0.591	ZNF317	zinc finger protein 317
231455_at	0.0046309	1.48e-05	-5.29	3.1331	-0.262	LINC00487	long intergenic non-protein coding RNA 487
40837_at	0.0046461	1.5e-05	-5.28	3.12322	-1.21	TLE2	transducin like enhancer of split 2
217078_s_at	0.0046461	1.5e-05	5.28	3.11956	0.764	CD300A	CD300a molecule
209732_at	0.0046581	1.52e-05	5.28	3.11196	1.46	CLEC2B	C-type lectin domain family 2 member B
215379_x_at	0.004707	1.54e-05	5.27	3.09712	1.06	IGLV1-44	immunoglobulin lambda variable 1-44
208873_s_at	0.0047128	1.56e-05	-5.27	3.08723	-0.515	REEP5	receptor accessory protein 5
226481_at	0.0047128	1.56e-05	-5.27	3.0857	-0.423	DCAF1	DDB1 and CUL4 associated factor 1
204427_s_at	0.0047845	1.6e-05	5.26	3.0617	0.865	TMED2	transmembrane p24 trafficking protein 2
215121_x_at	0.0047845	1.6e-05	5.26	3.05994	1.13	CYAT1///IGLV1-44///IGLC1	immunoglobulin lambda light chain-like///immunoglobulin lambda variable 1-44///immunoglobulin lambda constant 1
225150_s_at	0.0047845	1.61e-05	-5.26	3.05654	-1.14	RTKN	rhotekin
200739_s_at	0.004793	1.62e-05	5.25	3.04988	0.425	SUMO3	small ubiquitin-like modifier 3
224602_at	0.004796	1.63e-05	5.25	3.0443	0.764	C4orf3	chromosome 4 open reading frame 3
215949_x_at	0.0048266	1.65e-05	5.25	3.03348	2.54	IGHM	immunoglobulin heavy constant mu
1555814_a_at	0.0048508	1.67e-05	5.24	3.02197	0.466	RHOA	ras homolog family member A
217281_x_at	0.0048508	1.69e-05	5.24	3.01382	2.59	LOC102725526///IGHV4-31///IGHM///IGHG3///IGHG2///IGHG1///IGHA2///IGHA1///IGH	uncharacterized LOC102725526///immunoglobulin heavy variable 4-31///immunoglobulin heavy constant mu///immunoglobulin heavy constant gamma 3 (G3m marker)///immunoglobulin heavy constant gamma 2 (G2m marker)///immunoglobulin heavy constant gamma 1 (G1m marker)///immunoglobulin heavy constant alpha 2 (A2m marker)///immunoglobulin heavy constant alpha 1///immunoglobulin heavy locus
244509_at	0.0048508	1.69e-05	5.24	3.01104	0.357	GPR155	G protein-coupled receptor 155
211048_s_at	0.0048508	1.69e-05	5.24	3.00926	0.959	PDIA4	protein disulfide isomerase family A member 4
234366_x_at	0.004882	1.71e-05	5.23	2.99851	3.02	IGLJ3///CKAP2///IGLV@///IGLC1	immunoglobulin lambda joining 3///cytoskeleton associated protein 2///immunoglobulin lambda variable cluster///immunoglobulin lambda constant 1
217022_s_at	0.0048864	1.72e-05	5.23	2.99285	0.983	IGHA2///IGHA1///IGH	immunoglobulin heavy constant alpha 2 (A2m marker)///immunoglobulin heavy constant alpha 1///immunoglobulin heavy locus
226859_at	0.0049144	1.74e-05	-5.23	2.98279	-0.695	DNAJC25-GNG10///DNAJC25	DNAJC25-GNG10 readthrough///DnaJ heat shock protein family (Hsp40) member C25
218089_at	0.0049408	1.76e-05	-5.22	2.97308	-0.395	AAR2	AAR2 splicing factor homolog
209906_at	0.0049715	1.79e-05	5.22	2.95947	1.21	C3AR1	complement component 3a receptor 1
214669_x_at	0.0049715	1.81e-05	5.21	2.94935	1.41	IGKC	immunoglobulin kappa constant
223430_at	0.0049715	1.81e-05	-5.21	2.94764	-0.54	SIK2	salt inducible kinase 2
203136_at	0.0049715	1.82e-05	5.21	2.94415	0.695	RABAC1	Rab acceptor 1
211868_x_at	0.0049715	1.82e-05	5.21	2.94393	2	IGHV4-31///IGHM///IGHG3///IGHG2///IGHG1///IGHD///IGHA2///IGHA1///IGH	immunoglobulin heavy variable 4-31///immunoglobulin heavy constant mu///immunoglobulin heavy constant gamma 3 (G3m marker)///immunoglobulin heavy constant gamma 2 (G2m marker)///immunoglobulin heavy constant gamma 1 (G1m marker)///immunoglobulin heavy constant delta///immunoglobulin heavy constant alpha 2 (A2m marker)///immunoglobulin heavy constant alpha 1///immunoglobulin heavy locus
1568629_s_at	0.0050903	1.89e-05	-5.2	2.91056	-0.569	PIK3R2	phosphoinositide-3-kinase regulatory subunit 2
209796_s_at	0.0050903	1.89e-05	5.2	2.90888	0.575	CNPY2	canopy FGF signaling regulator 2
211637_x_at	0.0050903	1.89e-05	5.2	2.90803	3.15	IGHV3-23///IGHV4-31///IGHM///IGHG4///IGHG3///IGHG1///IGHD///IGHA2///IGHA1///IGH	immunoglobulin heavy variable 3-23///immunoglobulin heavy variable 4-31///immunoglobulin heavy constant mu///immunoglobulin heavy constant gamma 4 (G4m marker)///immunoglobulin heavy constant gamma 3 (G3m marker)///immunoglobulin heavy constant gamma 1 (G1m marker)///immunoglobulin heavy constant delta///immunoglobulin heavy constant alpha 2 (A2m marker)///immunoglobulin heavy constant alpha 1///…
217148_x_at	0.0050903	1.9e-05	5.19	2.90294	2.61	IGLJ3///IGLV@///IGLC1	immunoglobulin lambda joining 3///immunoglobulin lambda variable cluster///immunoglobulin lambda constant 1
204426_at	0.0050903	1.93e-05	5.19	2.89079	0.909	TMED2	transmembrane p24 trafficking protein 2
217235_x_at	0.0050903	1.93e-05	5.19	2.89057	2.47	IGLL5	immunoglobulin lambda like polypeptide 5
218914_at	0.0050903	1.93e-05	-5.19	2.89025	-0.456	RRNAD1	ribosomal RNA adenine dimethylase domain containing 1
213039_at	0.0051372	1.95e-05	-5.18	2.87731	-0.599	ARHGEF18	Rho/Rac guanine nucleotide exchange factor 18
202925_s_at	0.0051777	1.98e-05	-5.18	2.86561	-0.56	PLAGL2	PLAG1 like zinc finger 2
227305_s_at	0.0051901	2.01e-05	-5.17	2.85161	-0.377	SMCR8	Smith-Magenis syndrome chromosome region, candidate 8
216557_x_at	0.0051901	2.01e-05	5.17	2.84971	2.63	IGHV4-31///IGHM///IGHG3///IGHG1///IGHD///IGHA1	immunoglobulin heavy variable 4-31///immunoglobulin heavy constant mu///immunoglobulin heavy constant gamma 3 (G3m marker)///immunoglobulin heavy constant gamma 1 (G1m marker)///immunoglobulin heavy constant delta///immunoglobulin heavy constant alpha 1
224162_s_at	0.0051901	2.02e-05	-5.17	2.8478	-0.694	FBXO31	F-box protein 31
1553560_at	0.0051901	2.02e-05	-5.17	2.84584	-0.274	VN1R4	vomeronasal 1 receptor 4
1556059_s_at	0.0051915	2.03e-05	-5.17	2.84126	-0.471	SPEN	spen family transcriptional repressor
229715_at	0.0052286	2.07e-05	-5.16	2.82471	-1.68	NCR3LG1	natural killer cell cytotoxicity receptor 3 ligand 1
229397_s_at	0.0052286	2.07e-05	-5.16	2.82391	-0.492	ARHGAP35	Rho GTPase activating protein 35
210708_x_at	0.0052286	2.08e-05	5.16	2.81784	0.618	CASP10	caspase 10
231017_at	0.0052286	2.08e-05	-5.16	2.81754	-0.647	STK11	serine/threonine kinase 11
241344_at	0.0052372	2.11e-05	-5.16	2.80633	-0.482
219406_at	0.0052372	2.12e-05	-5.15	2.80419	-0.561	C1orf50	chromosome 1 open reading frame 50
233506_at	0.0052372	2.12e-05	-5.15	2.80337	-0.78
201004_at	0.0052591	2.14e-05	5.15	2.79533	1.06	SSR4	signal sequence receptor subunit 4
213473_at	0.0053391	2.18e-05	-5.14	2.7772	-0.498	BRAP	BRCA1 associated protein
228287_at	0.0053726	2.21e-05	-5.14	2.76561	-0.921	ING5	inhibitor of growth family member 5
203507_at	0.0053726	2.22e-05	5.14	2.76027	0.61	LOC101928634///SNORA67///CD68	uncharacterized LOC101928634///small nucleolar RNA, H/ACA box 67///CD68 molecule
236556_s_at	0.0053726	2.24e-05	-5.13	2.75181	-0.324	LONRF1	LON peptidase N-terminal domain and ring finger 1
213831_at	0.0053726	2.24e-05	5.13	2.75146	3.31	LOC100509457///HLA-DQA1	HLA class II histocompatibility antigen, DQ alpha 1 chain-like///major histocompatibility complex, class II, DQ alpha 1
209954_x_at	0.0053726	2.25e-05	5.13	2.74608	0.313	SS18	SS18, nBAF chromatin remodeling complex subunit
211582_x_at	0.0053726	2.26e-05	5.13	2.74199	1.06	LST1	leukocyte specific transcript 1
201270_x_at	0.0053726	2.27e-05	-5.13	2.73905	-0.311	NUDCD3	NudC domain containing 3
221855_at	0.0053726	2.28e-05	-5.13	2.73625	-0.418	SDHAF1	succinate dehydrogenase complex assembly factor 1
226813_at	0.0053726	2.28e-05	-5.13	2.73481	-0.998	NTPCR	nucleoside-triphosphatase, cancer-related
208146_s_at	0.0055135	2.36e-05	5.11	2.70285	1.61	CPVL	carboxypeptidase, vitellogenic like
210463_x_at	0.0055135	2.36e-05	-5.11	2.70133	-0.755	TRMT1	tRNA methyltransferase 1
200028_s_at	0.0055135	2.37e-05	-5.11	2.69896	-0.43	STARD7	StAR related lipid transfer domain containing 7
201855_s_at	0.0055788	2.41e-05	-5.11	2.68301	-0.537	ATMIN	ATM interactor
208667_s_at	0.0055788	2.42e-05	-5.1	2.68022	-0.574	ST13	suppression of tumorigenicity 13 (colon carcinoma) (Hsp70 interacting protein)
203381_s_at	0.0056788	2.47e-05	5.1	2.65988	1.11	APOE	apolipoprotein E
226145_s_at	0.0057451	2.53e-05	-5.09	2.63964	-1.48	FRAS1	Fraser extracellular matrix complex subunit 1
201880_at	0.0057451	2.53e-05	-5.09	2.63941	-0.353	ARIH1	ariadne RBR E3 ubiquitin protein ligase 1
208971_at	0.0057451	2.54e-05	5.09	2.6341	0.446	UROD	uroporphyrinogen decarboxylase
234884_x_at	0.0057451	2.54e-05	5.09	2.6337	2.97	CKAP2///IGLV@///IGLC1	cytoskeleton associated protein 2///immunoglobulin lambda variable cluster///immunoglobulin lambda constant 1
209044_x_at	0.0057688	2.56e-05	-5.08	2.62608	-0.513	SF3B4	splicing factor 3b subunit 4
226333_at	0.0058346	2.61e-05	-5.08	2.60982	-0.708	IL6R	interleukin 6 receptor
236591_at	0.0058346	2.61e-05	-5.07	2.6079	-0.842	MIR4458///MIR4458HG	microRNA 4458///MIR4458 host gene
218134_s_at	0.0058346	2.63e-05	-5.07	2.60091	-0.4	RBM22	RNA binding motif protein 22
218826_at	0.0058346	2.64e-05	-5.07	2.5997	-0.744	SLC35F2	solute carrier family 35 member F2
201129_at	0.0058346	2.65e-05	-5.07	2.59673	-0.859	SRSF7	serine and arginine rich splicing factor 7
215946_x_at	0.0059153	2.7e-05	5.06	2.57656	1.16	IGLL3P	immunoglobulin lambda like polypeptide 3, pseudogene
234764_x_at	0.0059153	2.73e-05	5.06	2.56701	3.16	IGLJ3///IGLV1-44///CKAP2///IGLV@///IGLC1	immunoglobulin lambda joining 3///immunoglobulin lambda variable 1-44///cytoskeleton associated protein 2///immunoglobulin lambda variable cluster///immunoglobulin lambda constant 1
201601_x_at	0.0059153	2.74e-05	5.06	2.56457	1.68	IFITM2///IFITM1	interferon induced transmembrane protein 2///interferon induced transmembrane protein 1
204370_at	0.0059153	2.75e-05	-5.06	2.56125	-0.545	CLP1	cleavage and polyadenylation factor I subunit 1
213852_at	0.0059153	2.76e-05	-5.05	2.55867	-0.839	RBM8A	RNA binding motif protein 8A
203315_at	0.0059153	2.76e-05	-5.05	2.55699	-0.382	NCK2	NCK adaptor protein 2
242919_at	0.0059153	2.77e-05	-5.05	2.5555	-0.574	ZNF253	zinc finger protein 253
222275_at	0.0059153	2.79e-05	-5.05	2.54784	-1.01	MRPS30	mitochondrial ribosomal protein S30
204588_s_at	0.0059153	2.79e-05	5.05	2.5472	1.3	SLC7A7	solute carrier family 7 member 7
233263_at	0.0059153	2.8e-05	5.05	2.54443	0.495
226238_at	0.0059153	2.81e-05	5.05	2.54227	0.655	MCEE	methylmalonyl-CoA epimerase
209514_s_at	0.0059153	2.83e-05	5.05	2.53589	0.907	RAB27A	RAB27A, member RAS oncogene family
218096_at	0.0059153	2.84e-05	-5.04	2.53245	-0.878	AGPAT5	1-acylglycerol-3-phosphate O-acyltransferase 5
222438_at	0.0059153	2.84e-05	-5.04	2.53241	-0.55	MED4	mediator complex subunit 4
218116_at	0.0059153	2.85e-05	-5.04	2.52965	-0.367	C9orf78	chromosome 9 open reading frame 78
201344_at	0.0059561	2.88e-05	-5.04	2.51977	-0.746	UBE2D2	ubiquitin conjugating enzyme E2 D2
221976_s_at	0.0059716	2.89e-05	-5.04	2.51387	-0.256	HDGFRP3	hepatoma-derived growth factor, related protein 3
213090_s_at	0.0059852	2.93e-05	-5.03	2.50364	-0.756	TAF4	TATA-box binding protein associated factor 4
223809_at	0.0059852	2.94e-05	5.03	2.49981	1.54	RGS18	regulator of G-protein signaling 18
226297_at	0.0059852	2.95e-05	-5.03	2.49761	-0.512	HIPK3	homeodomain interacting protein kinase 3
235587_at	0.0059852	2.96e-05	-5.03	2.49324	-0.801	PAXIP1-AS1	PAXIP1 antisense RNA 1 (head to head)
1567519_at	0.0059852	2.96e-05	-5.03	2.49319	-0.397	PLXNA3	plexin A3
203269_at	0.0059852	2.97e-05	-5.03	2.49104	-0.444	NSMAF	neutral sphingomyelinase activation associated factor
202833_s_at	0.0060787	3.05e-05	5.02	2.46609	2	SERPINA1	serpin family A member 1
227407_at	0.0060787	3.06e-05	-5.02	2.46305	-0.581	TAPT1	transmembrane anterior posterior transformation 1
208680_at	0.0060787	3.06e-05	5.02	2.46224	0.735	PRDX1	peroxiredoxin 1
212946_at	0.0060787	3.06e-05	-5.02	2.46098	-0.889	VWA8	von Willebrand factor A domain containing 8
218929_at	0.0060787	3.07e-05	-5.01	2.45976	-0.607	CDKN2AIP	CDKN2A interacting protein
202598_at	0.0060874	3.09e-05	5.01	2.45468	0.744	S100A13	S100 calcium binding protein A13
216984_x_at	0.0060874	3.1e-05	5.01	2.45176	2.33	IGLJ3///IGLV1-44///CKAP2///IGLV@///IGLC1	immunoglobulin lambda joining 3///immunoglobulin lambda variable 1-44///cytoskeleton associated protein 2///immunoglobulin lambda variable cluster///immunoglobulin lambda constant 1
203645_s_at	0.0060959	3.12e-05	5.01	2.4438	2.64	CD163	CD163 molecule
229585_at	0.0060959	3.13e-05	-5.01	2.44096	-0.836	ADAMTSL1	ADAMTS like 1
214807_at	0.0060959	3.14e-05	-5.01	2.43979	-0.708	PLXDC2	plexin domain containing 2
209558_s_at	0.0060959	3.15e-05	-5	2.43521	-0.492	HIP1R	huntingtin interacting protein 1 related
33646_g_at	0.0060959	3.16e-05	5	2.43335	0.751	GM2A	GM2 ganglioside activator
216491_x_at	0.0060959	3.17e-05	5	2.43023	3.39	IGHM	immunoglobulin heavy constant mu
224570_s_at	0.0060959	3.2e-05	-5	2.42101	-0.649	IRF2BP2	interferon regulatory factor 2 binding protein 2
211650_x_at	0.0060959	3.2e-05	5	2.41958	2.35	IGHV3-23///IGHV4-31///IGHM///IGHG3///IGHG1///IGHD///IGHA1///IGH	immunoglobulin heavy variable 3-23///immunoglobulin heavy variable 4-31///immunoglobulin heavy constant mu///immunoglobulin heavy constant gamma 3 (G3m marker)///immunoglobulin heavy constant gamma 1 (G1m marker)///immunoglobulin heavy constant delta///immunoglobulin heavy constant alpha 1///immunoglobulin heavy locus
204600_at	0.0060959	3.21e-05	-5	2.41866	-0.381	EPHB3	EPH receptor B3
203484_at	0.0060959	3.21e-05	5	2.41776	0.548	SEC61G	Sec61 translocon gamma subunit
210951_x_at	0.0061086	3.23e-05	5	2.41262	0.888	RAB27A	RAB27A, member RAS oncogene family
224068_x_at	0.0061372	3.26e-05	-4.99	2.40237	-0.378	RBM22	RNA binding motif protein 22
217179_x_at	0.0061372	3.28e-05	4.99	2.39866	2.92	BMS1P20	BMS1, ribosome biogenesis factor pseudogene 20
209312_x_at	0.0061372	3.31e-05	4.99	2.3893	1.68	LOC101060835///LOC100996809///HLA-DRB5///HLA-DRB4///HLA-DRB1///HLA-DQB1	HLA class II histocompatibility antigen, DQ beta 1 chain-like///HLA class II histocompatibility antigen, DRB1-10 beta chain-like///major histocompatibility complex, class II, DR beta 5///major histocompatibility complex, class II, DR beta 4///major histocompatibility complex, class II, DR beta 1///major histocompatibility complex, class II, DQ beta 1
203561_at	0.0061372	3.32e-05	4.99	2.38796	2.51	FCGR2A	Fc fragment of IgG receptor IIa
218131_s_at	0.0061372	3.32e-05	-4.98	2.38681	-0.555	GATAD2A	GATA zinc finger domain containing 2A
226230_at	0.0061372	3.33e-05	-4.98	2.38541	-0.471	PPP4R3B	protein phosphatase 4 regulatory subunit 3B
226710_at	0.0061372	3.33e-05	-4.98	2.38477	-0.457	C8orf82	chromosome 8 open reading frame 82
215049_x_at	0.0061372	3.34e-05	4.98	2.38045	2.6	CD163	CD163 molecule
213988_s_at	0.0061372	3.34e-05	4.98	2.37991	0.83	SAT1	spermidine/spermine N1-acetyltransferase 1
217833_at	0.0061382	3.36e-05	-4.98	2.37664	-0.788	SYNCRIP	synaptotagmin binding cytoplasmic RNA interacting protein
208306_x_at	0.0061637	3.38e-05	4.98	2.36972	1.49	HLA-DRB1	major histocompatibility complex, class II, DR beta 1
204580_at	0.0062069	3.42e-05	4.97	2.35908	3.28	MMP12	matrix metallopeptidase 12
201604_s_at	0.0062069	3.43e-05	4.97	2.3571	0.466	PPP1R12A	protein phosphatase 1 regulatory subunit 12A
235728_at	0.0062325	3.45e-05	-4.97	2.35023	-1.09	ZFP3	ZFP3 zinc finger protein
213227_at	0.0062412	3.5e-05	-4.97	2.33875	-0.728	PGRMC2	progesterone receptor membrane component 2
206788_s_at	0.0062412	3.5e-05	4.97	2.33817	0.62	CBFB	core-binding factor beta subunit
209153_s_at	0.0062412	3.51e-05	-4.96	2.33657	-0.655	TCF3	transcription factor 3
218038_at	0.0062412	3.52e-05	-4.96	2.33205	-0.348	ATP5SL	ATP5S like
229744_at	0.0062412	3.54e-05	-4.96	2.32866	-1.48	SSFA2	sperm specific antigen 2
200669_s_at	0.0062412	3.56e-05	4.96	2.32247	0.412	UBE2D3	ubiquitin conjugating enzyme E2 D3
201834_at	0.0062412	3.58e-05	-4.96	2.31809	-0.676	PRKAB1	protein kinase AMP-activated non-catalytic subunit beta 1
219872_at	0.0062412	3.58e-05	4.96	2.31704	0.604	FAM198B	family with sequence similarity 198 member B
52940_at	0.0062412	3.6e-05	-4.95	2.311	-0.489	SIGIRR	single Ig and TIR domain containing
204579_at	0.0062412	3.61e-05	-4.95	2.30879	-0.684	FGFR4	fibroblast growth factor receptor 4
225051_at	0.0062412	3.61e-05	-4.95	2.30846	-0.546	EPB41	erythrocyte membrane protein band 4.1
202160_at	0.0062412	3.62e-05	-4.95	2.30727	-0.564	CREBBP	CREB binding protein
218704_at	0.0062412	3.63e-05	-4.95	2.30538	-0.705	RNF43	ring finger protein 43
221787_at	0.0062412	3.63e-05	-4.95	2.30443	-0.769	C6orf120	chromosome 6 open reading frame 120
217719_at	0.0062412	3.63e-05	-4.95	2.3042	-0.388	EIF3L	eukaryotic translation initiation factor 3 subunit L
225278_at	0.0062726	3.66e-05	-4.95	2.29665	-0.775	PRKAB2	protein kinase AMP-activated non-catalytic subunit beta 2
209138_x_at	0.0063107	3.7e-05	4.94	2.28527	1.17	IGLC1	immunoglobulin lambda constant 1
225011_at	0.0063107	3.71e-05	-4.94	2.28526	-0.561	PRKAR2A	protein kinase cAMP-dependent type II regulatory subunit alpha
200839_s_at	0.0063368	3.73e-05	4.94	2.27841	1.04	CTSB	cathepsin B
1564192_at	0.0063368	3.74e-05	-4.94	2.27538	-0.232
217478_s_at	0.0063368	3.76e-05	4.94	2.27177	2.1	HLA-DMA	major histocompatibility complex, class II, DM alpha
201046_s_at	0.0063368	3.78e-05	-4.94	2.26721	-0.493	RAD23A	RAD23 homolog A, nucleotide excision repair protein
208853_s_at	0.0063368	3.78e-05	4.94	2.26677	0.769	CANX	calnexin
207214_at	0.0063368	3.79e-05	4.94	2.2643	2.81	SPINK4	serine peptidase inhibitor, Kazal type 4
201089_at	0.0063542	3.81e-05	4.93	2.25892	0.435	ATP6V1B2	ATPase H+ transporting V1 subunit B2
216060_s_at	0.0063546	3.82e-05	-4.93	2.25605	-0.533	DAAM1	dishevelled associated activator of morphogenesis 1
228520_s_at	0.0063625	3.84e-05	-4.93	2.2521	-0.785	APLP2	amyloid beta precursor like protein 2
223618_at	0.0064006	3.87e-05	-4.93	2.24376	-0.403	FMN2	formin 2
211835_at	0.0064023	3.89e-05	4.93	2.24072	1.29	IGKC	immunoglobulin kappa constant
203254_s_at	0.00644	3.92e-05	4.92	2.2325	0.743	TLN1	talin 1
1560661_x_at	0.0064622	3.95e-05	4.92	2.22654	0.53	LINC00342	long intergenic non-protein coding RNA 342
222423_at	0.0064812	3.98e-05	-4.92	2.21812	-0.435	NDFIP1	Nedd4 family interacting protein 1
210692_s_at	0.0064812	3.99e-05	4.92	2.21637	0.759	SLC43A3	solute carrier family 43 member 3
235159_at	0.0064812	3.99e-05	-4.92	2.21555	-0.6
212531_at	0.0064966	4.04e-05	4.91	2.20527	3.93	LCN2	lipocalin 2
229223_at	0.0064966	4.05e-05	-4.91	2.20279	-0.855
210220_at	0.0064966	4.05e-05	4.91	2.20271	0.677	FZD2	frizzled class receptor 2
202051_s_at	0.0064966	4.08e-05	-4.91	2.19661	-0.576	ZMYM4	zinc finger MYM-type containing 4
218746_at	0.0064966	4.08e-05	4.91	2.19647	0.779	TAPBPL	TAP binding protein like
200027_at	0.0064966	4.09e-05	-4.91	2.19367	-0.495	NARS	asparaginyl-tRNA synthetase
1557522_x_at	0.0064966	4.1e-05	-4.91	2.19053	-1.08
214916_x_at	0.0064966	4.11e-05	4.91	2.18996	2.41	IGHV3-23///IGHV4-31///IGHM///IGHG3///IGHG1///IGHA2///IGHA1	immunoglobulin heavy variable 3-23///immunoglobulin heavy variable 4-31///immunoglobulin heavy constant mu///immunoglobulin heavy constant gamma 3 (G3m marker)///immunoglobulin heavy constant gamma 1 (G1m marker)///immunoglobulin heavy constant alpha 2 (A2m marker)///immunoglobulin heavy constant alpha 1
219341_at	0.0064966	4.11e-05	-4.9	2.18824	-0.472	CLN8	ceroid-lipofuscinosis, neuronal 8
214181_x_at	0.0064966	4.15e-05	4.9	2.18095	1.18	LST1	leukocyte specific transcript 1
226072_at	0.0064966	4.15e-05	-4.9	2.18011	-0.444	FUK	fucokinase
210895_s_at	0.0064966	4.15e-05	4.9	2.17994	1.54	CD86	CD86 molecule
225703_at	0.0064966	4.16e-05	-4.9	2.17829	-0.63	FBRSL1	fibrosin like 1
202985_s_at	0.0065018	4.17e-05	-4.9	2.17491	-0.576	BAG5	BCL2 associated athanogene 5
223451_s_at	0.0065064	4.19e-05	4.9	2.17163	0.843	CKLF	chemokine like factor
200968_s_at	0.0065358	4.22e-05	4.9	2.16483	0.77	PPIB	peptidylprolyl isomerase B
204274_at	0.0065389	4.24e-05	-4.89	2.15937	-0.434	EBAG9	estrogen receptor binding site associated, antigen, 9
221496_s_at	0.0065389	4.25e-05	-4.89	2.15916	-0.789	TOB2	transducer of ERBB2, 2
213878_at	0.0066839	4.35e-05	-4.88	2.13625	-0.7	PYROXD1	pyridine nucleotide-disulphide oxidoreductase domain 1
207585_s_at	0.0067691	4.42e-05	4.88	2.12192	0.411	RPL36AL	ribosomal protein L36a like
205457_at	0.0067702	4.43e-05	4.88	2.11917	0.404	C6orf106	chromosome 6 open reading frame 106
201519_at	0.0067711	4.46e-05	-4.87	2.11436	-0.611	TOMM70	translocase of outer mitochondrial membrane 70
1555019_at	0.0067711	4.46e-05	-4.87	2.11389	-2.21	CDHR1	cadherin related family member 1
216560_x_at	0.0067941	4.49e-05	4.87	2.10819	2.82	IGLC1	immunoglobulin lambda constant 1
216510_x_at	0.0068327	4.53e-05	4.87	2.09981	2.78	IGHV3-23///IGHV4-31///IGHM///IGHG1///IGHA1	immunoglobulin heavy variable 3-23///immunoglobulin heavy variable 4-31///immunoglobulin heavy constant mu///immunoglobulin heavy constant gamma 1 (G1m marker)///immunoglobulin heavy constant alpha 1
222526_at	0.0068327	4.54e-05	-4.87	2.09782	-0.61	GATAD2A	GATA zinc finger domain containing 2A
1567213_at	0.0068666	4.58e-05	-4.86	2.08893	-0.612	PNN	pinin, desmosome associated protein
1562426_a_at	0.0068666	4.58e-05	4.86	2.08816	0.317	STK24	serine/threonine kinase 24
224691_at	0.0069565	4.66e-05	-4.86	2.07224	-0.48	UHMK1	U2AF homology motif (UHM) kinase 1
211990_at	0.0069565	4.69e-05	4.86	2.06743	1.51	HLA-DPA1	major histocompatibility complex, class II, DP alpha 1
205554_s_at	0.0069565	4.69e-05	4.86	2.06735	1.5	DNASE1L3	deoxyribonuclease 1 like 3
218882_s_at	0.0069565	4.69e-05	-4.85	2.06602	-0.889	WDR3	WD repeat domain 3
227961_at	0.0070428	4.77e-05	4.85	2.0521	0.996	CTSB	cathepsin B
204080_at	0.0071058	4.82e-05	-4.84	2.04136	-0.538	TOE1	target of EGR1, member 1 (nuclear)
214973_x_at	0.0071239	4.87e-05	4.84	2.03249	2.91	IGHD	immunoglobulin heavy constant delta
214845_s_at	0.0071239	4.87e-05	4.84	2.03203	1.31	CALU	calumenin
210916_s_at	0.0071239	4.87e-05	4.84	2.03154	1.27	CD44	CD44 molecule (Indian blood group)
222411_s_at	0.0071546	4.91e-05	4.84	2.02421	1.04	SSR3	signal sequence receptor subunit 3
235203_at	0.0071546	4.92e-05	-4.84	2.02263	-0.739
236552_at	0.00719	4.96e-05	4.83	2.01559	0.44
212589_at	0.0072056	5e-05	-4.83	2.00759	-1.19	RRAS2	related RAS viral (r-ras) oncogene homolog 2
200853_at	0.0072056	5e-05	4.83	2.00733	0.571	H2AFZ	H2A histone family member Z
231439_at	0.0072056	5.01e-05	-4.83	2.00624	-1.25	FAM84A	family with sequence similarity 84 member A
230893_at	0.0072289	5.05e-05	-4.83	1.99894	-0.604	DNAJC21	DnaJ heat shock protein family (Hsp40) member C21
228697_at	0.0072289	5.05e-05	-4.83	1.9984	-2.09	HINT3	histidine triad nucleotide binding protein 3
216542_x_at	0.007238	5.07e-05	4.83	1.99482	2.17	IGHM///IGHG1///IGHA1	immunoglobulin heavy constant mu///immunoglobulin heavy constant gamma 1 (G1m marker)///immunoglobulin heavy constant alpha 1
211395_x_at	0.0072694	5.11e-05	4.82	1.98839	1.64	FCGR2C	Fc fragment of IgG receptor IIc (gene/pseudogene)
223977_s_at	0.0072847	5.13e-05	-4.82	1.98403	-0.373	LINC00470	long intergenic non-protein coding RNA 470
222481_at	0.007339	5.18e-05	-4.82	1.97435	-0.876	TIMM10B	translocase of inner mitochondrial membrane 10 homolog B (yeast)
211641_x_at	0.007339	5.19e-05	4.82	1.97236	2.17	IGHV4-31///IGHM///IGHG3///IGHG1///IGHD///IGHA2///IGHA1	immunoglobulin heavy variable 4-31///immunoglobulin heavy constant mu///immunoglobulin heavy constant gamma 3 (G3m marker)///immunoglobulin heavy constant gamma 1 (G1m marker)///immunoglobulin heavy constant delta///immunoglobulin heavy constant alpha 2 (A2m marker)///immunoglobulin heavy constant alpha 1
214784_x_at	0.0073588	5.23e-05	-4.81	1.96621	-0.264	XPO6	exportin 6
214677_x_at	0.0073588	5.24e-05	4.81	1.96448	1.08	IGLC1	immunoglobulin lambda constant 1
203922_s_at	0.0073588	5.25e-05	4.81	1.96272	1.29	CYBB	cytochrome b-245 beta chain
222618_at	0.0073702	5.27e-05	-4.81	1.95891	-0.466	SMU1	DNA replication regulator and spliceosomal factor
211798_x_at	0.0073902	5.31e-05	4.81	1.95276	2.51	IGLJ3	immunoglobulin lambda joining 3
240959_at	0.0073902	5.31e-05	-4.81	1.95168	-0.206
201315_x_at	0.0074226	5.35e-05	4.81	1.94527	1.49	IFITM2	interferon induced transmembrane protein 2
208852_s_at	0.0074295	5.37e-05	4.8	1.94206	0.616	CANX	calnexin
217258_x_at	0.0074954	5.43e-05	4.8	1.93155	2.97	IGLV1-44	immunoglobulin lambda variable 1-44
217804_s_at	0.0074973	5.45e-05	-4.8	1.92866	-0.396	ILF3	interleukin enhancer binding factor 3
234335_s_at	0.0074973	5.48e-05	-4.8	1.92276	-0.598	FAM84A	family with sequence similarity 84 member A
1559117_at	0.0074973	5.49e-05	4.8	1.92033	0.535
219433_at	0.0074973	5.5e-05	-4.8	1.91896	-0.586	BCOR	BCL6 corepressor
211639_x_at	0.0074973	5.52e-05	4.79	1.91654	2.67	IGHV4-31///IGHM///IGHG4///IGHG3///IGHG1///IGHD///IGHA2///IGHA1///IGH	immunoglobulin heavy variable 4-31///immunoglobulin heavy constant mu///immunoglobulin heavy constant gamma 4 (G4m marker)///immunoglobulin heavy constant gamma 3 (G3m marker)///immunoglobulin heavy constant gamma 1 (G1m marker)///immunoglobulin heavy constant delta///immunoglobulin heavy constant alpha 2 (A2m marker)///immunoglobulin heavy constant alpha 1///immunoglobulin heavy locus
213502_x_at	0.0074973	5.52e-05	4.79	1.91602	1.07	GUSBP11	glucuronidase, beta pseudogene 11
207018_s_at	0.0074973	5.54e-05	4.79	1.91289	0.6	RAB27B	RAB27B, member RAS oncogene family
225376_at	0.0074973	5.54e-05	-4.79	1.9128	-0.53	GID8	GID complex subunit 8 homolog
240528_s_at	0.0075032	5.58e-05	4.79	1.90552	0.818	EXOC4	exocyst complex component 4
203382_s_at	0.0075032	5.58e-05	4.79	1.90529	1.11	APOE	apolipoprotein E
202795_x_at	0.0075032	5.59e-05	-4.79	1.90522	-0.362	TRIOBP	TRIO and F-actin binding protein
218710_at	0.0075134	5.61e-05	-4.79	1.90122	-0.43	TTC27	tetratricopeptide repeat domain 27
217506_at	0.0075134	5.62e-05	-4.79	1.89942	-0.975
216640_s_at	0.007544	5.68e-05	4.78	1.88997	0.564	PDIA6	protein disulfide isomerase family A member 6
219159_s_at	0.007544	5.68e-05	4.78	1.88975	1.93	SLAMF7	SLAM family member 7
220734_s_at	0.007544	5.68e-05	-4.78	1.88889	-0.659	CPTP	ceramide-1-phosphate transfer protein
224342_x_at	0.0075534	5.71e-05	4.78	1.88549	2.84	BMS1P20	BMS1, ribosome biogenesis factor pseudogene 20
235201_at	0.0076761	5.81e-05	-4.77	1.86833	-0.938	FOXP2	forkhead box P2
202411_at	0.0077075	5.85e-05	4.77	1.86231	1.61	IFI27	interferon alpha inducible protein 27
208579_x_at	0.0077077	5.86e-05	4.77	1.86006	0.77	H2BFS	H2B histone family member S
214290_s_at	0.0078093	5.96e-05	4.77	1.84571	1.25	HIST2H2AA4///HIST2H2AA3	histone cluster 2, H2aa4///histone cluster 2, H2aa3
1560060_s_at	0.0078257	5.98e-05	-4.76	1.84155	-0.526	VPS37C	VPS37C, ESCRT-I subunit
219053_s_at	0.0078463	6.01e-05	-4.76	1.83691	-0.473	VPS37C	VPS37C, ESCRT-I subunit
226825_s_at	0.007856	6.03e-05	4.76	1.83356	0.927	TMEM165	transmembrane protein 165
220349_s_at	0.0079033	6.09e-05	-4.76	1.8258	-0.957	ENGASE	endo-beta-N-acetylglucosaminidase
211634_x_at	0.0079486	6.13e-05	4.75	1.81831	2.98	IGHM	immunoglobulin heavy constant mu
224163_s_at	0.0079987	6.19e-05	-4.75	1.81029	-0.445	DMAP1	DNA methyltransferase 1 associated protein 1
206913_at	0.0080067	6.21e-05	4.75	1.80719	0.329	BAAT	bile acid-CoA:amino acid N-acyltransferase
219385_at	0.0080285	6.25e-05	4.75	1.80084	0.826	SLAMF8	SLAM family member 8
212343_at	0.0080285	6.26e-05	-4.75	1.7991	-0.529	YIPF6	Yip1 domain family member 6
227986_at	0.0080285	6.28e-05	-4.75	1.79598	-0.516	ZNF343	zinc finger protein 343
208698_s_at	0.0080285	6.3e-05	4.74	1.7935	0.527	NONO	non-POU domain containing, octamer-binding
1557309_at	0.0080285	6.3e-05	-4.74	1.79317	-0.427	DENND1B	DENN domain containing 1B
204012_s_at	0.0080285	6.32e-05	-4.74	1.7915	-0.704	LCMT2	leucine carboxyl methyltransferase 2
243099_at	0.0080285	6.33e-05	4.74	1.78921	0.64	NFAM1	NFAT activating protein with ITAM motif 1
222125_s_at	0.0080285	6.35e-05	-4.74	1.7866	-0.426	P4HTM	prolyl 4-hydroxylase, transmembrane
243023_at	0.0080285	6.36e-05	-4.74	1.78522	-0.413
1570561_at	0.0080818	6.42e-05	-4.74	1.77669	-0.232
211661_x_at	0.0080818	6.44e-05	4.74	1.77353	0.891	PTAFR	platelet activating factor receptor
227167_s_at	0.0080818	6.46e-05	-4.74	1.77005	-0.465	RASSF3	Ras association domain family member 3
212203_x_at	0.0080818	6.47e-05	4.73	1.76932	1.46	IFITM3	interferon induced transmembrane protein 3
203955_at	0.0080818	6.47e-05	-4.73	1.76846	-0.519	PPP1R26	protein phosphatase 1 regulatory subunit 26
220330_s_at	0.0081026	6.51e-05	4.73	1.76397	1.98	SAMSN1	SAM domain, SH3 domain and nuclear localization signals 1
217842_at	0.0081315	6.54e-05	-4.73	1.75856	-0.584	C7orf55-LUC7L2///LUC7L2	C7orf55-LUC7L2 readthrough///LUC7 like 2, pre-mRNA splicing factor
221749_at	0.0082212	6.64e-05	-4.73	1.74547	-0.51	YTHDF3	YTH N6-methyladenosine RNA binding protein 3
222218_s_at	0.0082212	6.66e-05	4.72	1.74188	0.732	PILRA	paired immunoglobin like type 2 receptor alpha
222010_at	0.0082212	6.69e-05	-4.72	1.7383	-0.617	SNORA29///TCP1	small nucleolar RNA, H/ACA box 29///t-complex 1
211429_s_at	0.0082212	6.71e-05	4.72	1.73497	1.87	SERPINA1	serpin family A member 1
1555600_s_at	0.0082212	6.74e-05	4.72	1.73161	0.77	APOL4	apolipoprotein L4
212465_at	0.0082212	6.74e-05	-4.72	1.73111	-0.426	SETD3	SET domain containing 3
204329_s_at	0.0082212	6.74e-05	-4.72	1.73074	-0.58	ZNF202	zinc finger protein 202
230006_s_at	0.0082212	6.75e-05	-4.72	1.73016	-0.468	SVIP	small VCP interacting protein
227217_at	0.0082212	6.77e-05	-4.72	1.72749	-0.738	WNK2	WNK lysine deficient protein kinase 2
224358_s_at	0.0082212	6.79e-05	4.72	1.72423	1.04	MS4A7	membrane spanning 4-domains A7
203171_s_at	0.0082212	6.8e-05	-4.72	1.72281	-0.412	RRP8	ribosomal RNA processing 8, methyltransferase, homolog (yeast)
202724_s_at	0.0082212	6.83e-05	-4.71	1.71939	-0.517	FOXO1	forkhead box O1
232213_at	0.0082212	6.85e-05	4.71	1.71619	0.712	PELI1	pellino E3 ubiquitin protein ligase 1
217785_s_at	0.0082212	6.85e-05	4.71	1.71578	0.718	YKT6	YKT6 v-SNARE homolog (S. cerevisiae)
212430_at	0.0082212	6.85e-05	-4.71	1.71572	-0.798	RBM38	RNA binding motif protein 38
223565_at	0.0082212	6.86e-05	4.71	1.71534	2.49	MZB1	marginal zone B and B1 cell specific protein
200598_s_at	0.0082454	6.9e-05	4.71	1.70915	0.957	MIR3652///HSP90B1	microRNA 3652///heat shock protein 90 beta family member 1
217227_x_at	0.0082454	6.91e-05	4.71	1.70857	2.69	IGLV1-44	immunoglobulin lambda variable 1-44
228752_at	0.0082706	6.95e-05	-4.71	1.70333	-1.12	CRACR2A	calcium release activated channel regulator 2A
203898_at	0.0082706	6.96e-05	-4.71	1.7017	-0.555	CRCP	CGRP receptor component
209714_s_at	0.0082765	6.98e-05	4.71	1.69903	1.11	CDKN3	cyclin dependent kinase inhibitor 3
212456_at	0.0082965	7.02e-05	-4.7	1.69345	-0.613	CLUH	clustered mitochondria homolog
226360_at	0.0082965	7.03e-05	-4.7	1.69278	-1.23	ZNRF3	zinc and ring finger 3
1554628_at	0.0083689	7.1e-05	-4.7	1.68274	-1.06	ZNF57	zinc finger protein 57
215217_at	0.0084183	7.16e-05	4.7	1.67527	0.644	IGKC	immunoglobulin kappa constant
1556186_s_at	0.0084183	7.17e-05	-4.7	1.67331	-0.58	EMC1	ER membrane protein complex subunit 1
235458_at	0.00843	7.2e-05	4.69	1.67005	0.776	HAVCR2	hepatitis A virus cellular receptor 2
212013_at	0.0084749	7.26e-05	4.69	1.66189	1.2	PXDN	peroxidasin
202747_s_at	0.0084749	7.27e-05	4.69	1.66117	0.898	ITM2A	integral membrane protein 2A
209132_s_at	0.0084874	7.3e-05	4.69	1.65783	0.405	COMMD4	COMM domain containing 4
220217_x_at	0.0084946	7.32e-05	-4.69	1.65507	-0.344	SPANXA2///SPANXC///SPANXA1	SPANX family member A2///SPANX family member C///sperm protein associated with the nucleus, X-linked, family member A1
228994_at	0.0085314	7.37e-05	-4.69	1.64814	-0.513	CCDC24	coiled-coil domain containing 24
207764_s_at	0.0085314	7.39e-05	4.68	1.64611	0.567	HIPK3	homeodomain interacting protein kinase 3
220005_at	0.0085314	7.42e-05	4.68	1.64229	1.2	P2RY13	purinergic receptor P2Y13
221210_s_at	0.0085314	7.42e-05	4.68	1.64169	1.01	NPL	N-acetylneuraminate pyruvate lyase
1552457_a_at	0.0085314	7.44e-05	-4.68	1.64027	-0.304	ADAMTSL1	ADAMTS like 1
209737_at	0.0085314	7.45e-05	-4.68	1.63827	-0.794	MAGI2	membrane associated guanylate kinase, WW and PDZ domain containing 2
224522_s_at	0.0085314	7.46e-05	-4.68	1.63742	-0.698	DCAKD	dephospho-CoA kinase domain containing
210334_x_at	0.008574	7.54e-05	4.68	1.62776	0.928	BIRC5	baculoviral IAP repeat containing 5
203314_at	0.008574	7.54e-05	-4.68	1.62746	-0.547	GTPBP6	GTP binding protein 6 (putative)
208025_s_at	0.008574	7.54e-05	-4.68	1.62702	-1.1	HMGA2	high mobility group AT-hook 2
226963_at	0.0085862	7.57e-05	4.68	1.62377	0.445	BTF3L4	basic transcription factor 3 like 4
203349_s_at	0.008597	7.59e-05	4.67	1.62069	0.496	ETV5	ETS variant 5
225667_s_at	0.0086658	7.67e-05	-4.67	1.61139	-0.952	FAM84A	family with sequence similarity 84 member A
210133_at	0.0087031	7.74e-05	4.67	1.60349	2.9	CCL11	C-C motif chemokine ligand 11
208739_x_at	0.0087031	7.74e-05	4.67	1.6026	0.496	LOC101929087///SUMO2///SUMO3	small ubiquitin-related modifier 2 pseudogene///small ubiquitin-like modifier 2///small ubiquitin-like modifier 3
206853_s_at	0.0087031	7.75e-05	-4.67	1.60157	-0.448	MAP3K7	mitogen-activated protein kinase kinase kinase 7
226887_at	0.0087031	7.77e-05	-4.67	1.59979	-0.505	HSPA14	heat shock protein family A (Hsp70) member 14
220580_at	0.0087047	7.79e-05	4.67	1.59774	0.295	BICC1	BicC family RNA binding protein 1
201835_s_at	0.0087135	7.81e-05	-4.66	1.59491	-0.773	PRKAB1	protein kinase AMP-activated non-catalytic subunit beta 1
215359_x_at	0.0087847	7.9e-05	-4.66	1.58375	-0.565	LOC101060181///ZNF44	zinc finger protein ZnFP12///zinc finger protein 44
212541_at	0.0087847	7.91e-05	-4.66	1.5833	-0.494	FLAD1	flavin adenine dinucleotide synthetase 1
227516_at	0.0087847	7.92e-05	-4.66	1.58172	-0.44	SF3A1	splicing factor 3a subunit 1
207922_s_at	0.0088728	8.03e-05	-4.65	1.56941	-0.367	MAEA	macrophage erythroblast attacher
203388_at	0.0088728	8.03e-05	4.65	1.56873	0.451	ARRB2	arrestin beta 2
200756_x_at	0.0088785	8.09e-05	4.65	1.56239	1.08	CALU	calumenin
239077_at	0.0088785	8.12e-05	4.65	1.55915	0.486	CSGALNACT2	chondroitin sulfate N-acetylgalactosaminyltransferase 2
202762_at	0.0088785	8.14e-05	-4.65	1.55621	-0.512	ROCK2	Rho associated coiled-coil containing protein kinase 2
219074_at	0.0088785	8.15e-05	-4.65	1.55487	-0.493	TMEM184C	transmembrane protein 184C
203250_at	0.0088785	8.17e-05	-4.65	1.55355	-0.547	SCAF8	SR-related CTD associated factor 8
238719_at	0.0088785	8.17e-05	-4.65	1.55332	-0.87	PPP2CA	protein phosphatase 2 catalytic subunit alpha
208018_s_at	0.0088785	8.18e-05	4.65	1.55177	1.25	HCK	HCK proto-oncogene, Src family tyrosine kinase
1554085_at	0.0088785	8.19e-05	-4.65	1.55107	-0.528	DDX51	DEAD-box helicase 51
222835_at	0.0088785	8.2e-05	-4.65	1.54976	-1.03	THSD4	thrombospondin type 1 domain containing 4
214123_s_at	0.0088785	8.21e-05	-4.65	1.54842	-0.588	NOP14-AS1	NOP14 antisense RNA 1
226994_at	0.0088785	8.23e-05	-4.64	1.54603	-0.624	DNAJA2	DnaJ heat shock protein family (Hsp40) member A2
1554355_a_at	0.0088785	8.23e-05	-4.64	1.54597	-0.264	SIAE	sialic acid acetylesterase
218455_at	0.0089023	8.27e-05	-4.64	1.54166	-0.611	NFS1	NFS1 cysteine desulfurase
216488_s_at	0.0089847	8.37e-05	4.64	1.53062	0.573	ATP11A	ATPase phospholipid transporting 11A
228189_at	0.0089847	8.38e-05	-4.64	1.5295	-0.424	BAG4	BCL2 associated athanogene 4
209463_s_at	0.0089991	8.41e-05	4.64	1.5262	0.418	TAF12	TATA-box binding protein associated factor 12
220391_at	0.0090039	8.43e-05	-4.64	1.52389	-0.527	ZBTB3	zinc finger and BTB domain containing 3
222475_at	0.0090848	8.52e-05	-4.63	1.51381	-0.341	SAP30BP	SAP30 binding protein
214398_s_at	0.0091306	8.63e-05	4.63	1.502	0.385	IKBKE	inhibitor of kappa light polypeptide gene enhancer in B-cells, kinase epsilon
218673_s_at	0.0091306	8.63e-05	4.63	1.50194	0.423	ATG7	autophagy related 7
206641_at	0.0091306	8.66e-05	4.63	1.49951	2.26	TNFRSF17	TNF receptor superfamily member 17
222707_s_at	0.0091306	8.66e-05	4.63	1.49911	0.316	ACTR8	ARP8 actin-related protein 8 homolog
233303_at	0.0091306	8.67e-05	4.62	1.49766	0.908
203701_s_at	0.0091306	8.68e-05	-4.62	1.49684	-0.706	TRMT1	tRNA methyltransferase 1
230287_at	0.0091306	8.68e-05	-4.62	1.4966	-0.568	SGSM1	small G protein signaling modulator 1
204834_at	0.0091668	8.75e-05	4.62	1.48967	1.26	FGL2	fibrinogen like 2
212281_s_at	0.0091668	8.75e-05	-4.62	1.48938	-0.739	TMEM97	transmembrane protein 97
211540_s_at	0.0092099	8.81e-05	4.62	1.48327	0.467	RB1	RB transcriptional corepressor 1
91617_at	0.0092144	8.83e-05	-4.62	1.48105	-0.571	MIR1306///DGCR8	microRNA 1306///DGCR8 microprocessor complex subunit
209752_at	0.0092337	8.88e-05	4.62	1.47576	6.05	REG1A	regenerating family member 1 alpha
214306_at	0.0092337	8.88e-05	-4.62	1.47558	-1.22	OPA1	OPA1, mitochondrial dynamin like GTPase
202605_at	0.0092394	8.91e-05	-4.61	1.47307	-0.4	GUSB	glucuronidase beta
203527_s_at	0.0092394	8.92e-05	-4.61	1.4715	-0.325	APC	APC, WNT signaling pathway regulator
236351_at	0.0092625	8.97e-05	-4.61	1.46643	-1.87	DPP10-AS1	DPP10 antisense RNA 1
212692_s_at	0.0092625	8.98e-05	-4.61	1.4653	-0.442	LRBA	LPS responsive beige-like anchor protein
215977_x_at	0.0092625	9e-05	4.61	1.46394	0.759	GK	glycerol kinase
201352_at	0.0092898	9.05e-05	-4.61	1.45881	-0.397	YME1L1	YME1 like 1 ATPase
227527_at	0.0092898	9.06e-05	-4.61	1.45756	-0.846	KMT2D	lysine methyltransferase 2D
230550_at	0.0092898	9.07e-05	4.61	1.456	0.648	MS4A6A	membrane spanning 4-domains A6A
224688_at	0.0093396	9.15e-05	-4.6	1.4481	-0.529	TMEM248	transmembrane protein 248
218099_at	0.0093396	9.16e-05	-4.6	1.4471	-0.5	TEX2	testis expressed 2
221516_s_at	0.0093396	9.17e-05	-4.6	1.44587	-0.604	MIEF1	mitochondrial elongation factor 1
205135_s_at	0.0093643	9.22e-05	-4.6	1.44093	-0.696	NUFIP1	NUFIP1, FMR1 interacting protein 1
209474_s_at	0.0093643	9.26e-05	4.6	1.43755	2.02	ENTPD1	ectonucleoside triphosphate diphosphohydrolase 1
201919_at	0.0093643	9.28e-05	-4.6	1.43503	-0.562	SLC25A36	solute carrier family 25 member 36
238813_at	0.0093643	9.3e-05	-4.6	1.43356	-0.714	APEX2	apurinic/apyrimidinic endodeoxyribonuclease 2
213196_at	0.0093643	9.3e-05	-4.6	1.43336	-0.469	ZNF629	zinc finger protein 629
218956_s_at	0.0093643	9.3e-05	-4.6	1.43313	-0.505	ATP5J2-PTCD1///PTCD1	ATP5J2-PTCD1 readthrough///pentatricopeptide repeat domain 1
222794_x_at	0.0093856	9.34e-05	-4.6	1.42933	-0.722	MTPAP	mitochondrial poly(A) polymerase
201976_s_at	0.0093955	9.37e-05	-4.6	1.4258	-0.592	MYO10	myosin X
232118_at	0.0093955	9.38e-05	-4.6	1.42496	-0.526
1555758_a_at	0.0094496	9.45e-05	4.59	1.41795	1.22	CDKN3	cyclin dependent kinase inhibitor 3
216091_s_at	0.0094746	9.5e-05	4.59	1.41381	0.377	BTRC	beta-transducin repeat containing E3 ubiquitin protein ligase
210559_s_at	0.0094791	9.52e-05	4.59	1.41169	0.992	CDK1	cyclin dependent kinase 1
225726_s_at	0.0095228	9.58e-05	-4.59	1.40574	-1.11	PLEKHH1	pleckstrin homology, MyTH4 and FERM domain containing H1
208617_s_at	0.0095307	9.6e-05	-4.59	1.40329	-0.354	PTP4A2	protein tyrosine phosphatase type IVA, member 2
203052_at	0.0095651	9.67e-05	4.58	1.39742	1.71	C2	complement component 2
223385_at	0.0095651	9.67e-05	-4.58	1.3966	-1.14	CYP2S1	cytochrome P450 family 2 subfamily S member 1
204028_s_at	0.0096004	9.75e-05	-4.58	1.38945	-0.443	RABGAP1	RAB GTPase activating protein 1
230257_s_at	0.0096004	9.76e-05	4.58	1.38852	0.463	TSEN15	tRNA splicing endonuclease subunit 15
1565254_s_at	0.0096004	9.78e-05	4.58	1.3869	0.404	ELL	elongation factor for RNA polymerase II
209593_s_at	0.0096004	9.78e-05	-4.58	1.38652	-0.475	TOR1B	torsin family 1 member B
212768_s_at	0.0096445	9.85e-05	4.58	1.3798	3.41	OLFM4	olfactomedin 4
227698_s_at	0.0096445	9.86e-05	-4.58	1.37896	-0.796	RAB40C	RAB40C, member RAS oncogene family
210156_s_at	0.0096792	9.91e-05	4.57	1.37398	0.443	PCMT1	protein-L-isoaspartate (D-aspartate) O-methyltransferase
56256_at	0.0097304	9.98e-05	-4.57	1.36745	-0.638	SIDT2	SID1 transmembrane family member 2
203563_at	0.0097361	0.0001	-4.57	1.36509	-0.288	AFAP1	actin filament associated protein 1
208760_at	0.0097361	0.0001	-4.57	1.36361	-0.809	UBE2I	ubiquitin conjugating enzyme E2 I
239824_s_at	0.0097491	0.000101	4.57	1.35968	0.628	TMEM107	transmembrane protein 107
40829_at	0.0097491	0.000101	-4.57	1.35909	-0.292	WDTC1	WD and tetratricopeptide repeats 1
212074_at	0.0097526	0.000101	-4.57	1.35587	-0.683	SUN1	Sad1 and UNC84 domain containing 1
1554549_a_at	0.0097526	0.000101	-4.57	1.35549	-0.394	WDR20	WD repeat domain 20
201983_s_at	0.0097567	0.000101	-4.57	1.35346	-0.802	EGFR	epidermal growth factor receptor
230921_s_at	0.0097764	0.000102	-4.56	1.34862	-0.769	MAP3K12	mitogen-activated protein kinase kinase kinase 12
229245_at	0.0097764	0.000102	-4.56	1.34692	-1.02	PLEKHA6	pleckstrin homology domain containing A6
200642_at	0.0097764	0.000102	4.56	1.34405	0.694	SOD1	superoxide dismutase 1, soluble
205771_s_at	0.0097764	0.000103	-4.56	1.34307	-1.28	AKAP7	A-kinase anchoring protein 7
1558166_at	0.0097764	0.000103	-4.56	1.34248	-0.368	MGC16275	uncharacterized protein MGC16275
211581_x_at	0.0097764	0.000103	4.56	1.34187	0.846	LST1	leukocyte specific transcript 1
210534_s_at	0.0098009	0.000103	4.56	1.33794	0.919	B9D1	B9 domain containing 1
203782_s_at	0.0098041	0.000103	-4.56	1.33604	-0.688	POLRMT	RNA polymerase mitochondrial
227156_at	0.0098775	0.000104	-4.56	1.32752	-0.714	CASK	calcium/calmodulin dependent serine protein kinase
212671_s_at	0.0098943	0.000105	4.55	1.32349	2.14	LOC100509457///HLA-DQA2///HLA-DQA1	HLA class II histocompatibility antigen, DQ alpha 1 chain-like///major histocompatibility complex, class II, DQ alpha 2///major histocompatibility complex, class II, DQ alpha 1
201517_at	0.0098943	0.000105	-4.55	1.32275	-0.344	NCBP2	nuclear cap binding protein subunit 2
214334_x_at	0.0099015	0.000105	-4.55	1.31909	-0.488	DAZAP2	DAZ associated protein 2
225237_s_at	0.0099015	0.000105	4.55	1.31889	0.752	MSI2	musashi RNA binding protein 2
201255_x_at	0.009964	0.000106	-4.55	1.31123	-0.336	BAG6	BCL2 associated athanogene 6
235800_at	0.009964	0.000106	-4.55	1.30988	-0.389
224315_at	0.0099808	0.000107	-4.55	1.30674	-0.62	DDX20	DEAD-box helicase 20
218590_at	0.0099875	0.000107	-4.55	1.30453	-0.795	C10orf2	chromosome 10 open reading frame 2
225311_at	0.0100543	0.000108	-4.54	1.29678	-0.5	IVD	isovaleryl-CoA dehydrogenase
207691_x_at	0.0100893	0.000108	4.54	1.29198	1.93	ENTPD1	ectonucleoside triphosphate diphosphohydrolase 1
222980_at	0.0101083	0.000109	-4.54	1.28728	-0.43	RAB10	RAB10, member RAS oncogene family
209630_s_at	0.0101083	0.000109	-4.54	1.28644	-0.361	FBXW2	F-box and WD repeat domain containing 2
214543_x_at	0.0101083	0.000109	4.54	1.28553	0.448	QKI	QKI, KH domain containing RNA binding
213993_at	0.0101125	0.000109	-4.54	1.28357	-1.6	SPON1	spondin 1
217260_x_at	0.0101582	0.00011	4.53	1.27385	0.7	LOC102723479	uncharacterized LOC102723479
213002_at	0.0101582	0.000111	-4.53	1.27235	-0.774	MARCKS	myristoylated alanine rich protein kinase C substrate
224621_at	0.0101582	0.000111	-4.53	1.27167	-0.343	MAPK1	mitogen-activated protein kinase 1
200690_at	0.0101582	0.000111	-4.53	1.27104	-0.675	HSPA9	heat shock protein family A (Hsp70) member 9
AFFX-r2-P1-cre-3_at	0.0101582	0.000111	-4.53	1.26986	-0.382
214113_s_at	0.0101582	0.000111	-4.53	1.26915	-0.601	RBM8A	RNA binding motif protein 8A
202548_s_at	0.0101582	0.000111	-4.53	1.26764	-0.44	ARHGEF7	Rho guanine nucleotide exchange factor 7
204222_s_at	0.0101582	0.000111	4.53	1.26695	1.49	GLIPR1	GLI pathogenesis related 1
223680_at	0.0101865	0.000112	-4.53	1.2626	-0.287	ZNF607	zinc finger protein 607
221698_s_at	0.0101865	0.000112	4.53	1.25947	1.58	CLEC7A	C-type lectin domain family 7 member A
204598_at	0.0101865	0.000112	-4.53	1.2585	-0.367	UBOX5	U-box domain containing 5
218478_s_at	0.0101865	0.000113	-4.53	1.25678	-0.446	ZCCHC8	zinc finger CCHC-type containing 8
222759_at	0.0101865	0.000113	-4.53	1.25668	-0.563	KMT5B	lysine methyltransferase 5B
1555326_a_at	0.0101865	0.000113	4.53	1.25516	1.38	ADAM9	ADAM metallopeptidase domain 9
218559_s_at	0.0102196	0.000114	4.52	1.24852	1.46	MAFB	MAF bZIP transcription factor B
218217_at	0.0102196	0.000114	4.52	1.24686	0.843	SCPEP1	serine carboxypeptidase 1
226113_at	0.0102196	0.000114	-4.52	1.24677	-0.669	ZNF436	zinc finger protein 436
228813_at	0.0102196	0.000114	-4.52	1.24605	-0.617	HDAC4	histone deacetylase 4
204431_at	0.0102465	0.000114	-4.52	1.24167	-1.2	TLE2	transducin like enhancer of split 2
224636_at	0.0102465	0.000115	-4.52	1.24059	-0.474	ZFP91	ZFP91 zinc finger protein
201852_x_at	0.0102572	0.000115	4.52	1.23656	1.51	COL3A1	collagen type III alpha 1 chain
203071_at	0.0102572	0.000115	-4.52	1.23459	-0.587	MIR6872///SEMA3B	microRNA 6872///semaphorin 3B
208114_s_at	0.0102572	0.000115	-4.52	1.23447	-0.655	ISG20L2	interferon stimulated exonuclease gene 20 like 2
211635_x_at	0.0102572	0.000115	4.52	1.23358	2.82	IGHV4-31///IGHM///IGHG4///IGHG3///IGHG1///IGHD///IGHA2///IGHA1	immunoglobulin heavy variable 4-31///immunoglobulin heavy constant mu///immunoglobulin heavy constant gamma 4 (G4m marker)///immunoglobulin heavy constant gamma 3 (G3m marker)///immunoglobulin heavy constant gamma 1 (G1m marker)///immunoglobulin heavy constant delta///immunoglobulin heavy constant alpha 2 (A2m marker)///immunoglobulin heavy constant alpha 1
227904_at	0.0102574	0.000116	-4.52	1.23206	-0.415	AZI2	5-azacytidine induced 2
209619_at	0.0102677	0.000116	4.52	1.22963	1.63	CD74	CD74 molecule
55616_at	0.0102716	0.000116	-4.51	1.22707	-0.842	PGAP3	post-GPI attachment to proteins 3
209949_at	0.0102716	0.000116	4.51	1.22628	1.96	NCF2	neutrophil cytosolic factor 2
208785_s_at	0.0102998	0.000117	4.51	1.22225	0.536	MAP1LC3B	microtubule associated protein 1 light chain 3 beta
225162_at	0.0103404	0.000117	-4.51	1.21711	-0.548	SH3D19	SH3 domain containing 19
221058_s_at	0.0103509	0.000118	4.51	1.21365	0.641	CKLF	chemokine like factor
200805_at	0.0103509	0.000118	4.51	1.2132	0.4	LMAN2	lectin, mannose binding 2
205018_s_at	0.0104004	0.000119	4.51	1.2073	1.04	MBNL2	muscleblind like splicing regulator 2
238755_at	0.010402	0.000119	-4.51	1.20557	-1.02	RASSF10	Ras association domain family member 10
212636_at	0.010402	0.000119	4.51	1.2042	1.18	QKI	QKI, KH domain containing RNA binding
1555266_a_at	0.0104162	0.000119	4.5	1.20145	0.489	ASXL2	additional sex combs like 2, transcriptional regulator
210633_x_at	0.0104633	0.00012	-4.5	1.19581	-0.468	KRT10	keratin 10
238007_at	0.0105117	0.000121	-4.5	1.18997	-0.499	ZNF271P	zinc finger protein 271, pseudogene
221274_s_at	0.0105117	0.000121	-4.5	1.18859	-0.483	LMAN2L	lectin, mannose binding 2 like
201562_s_at	0.0105159	0.000121	4.5	1.18676	0.816	SORD	sorbitol dehydrogenase
238829_at	0.0105458	0.000122	-4.5	1.18266	-0.447
223093_at	0.0105843	0.000123	-4.49	1.17783	-1.11	ANKH	ANKH inorganic pyrophosphate transport regulator
227320_at	0.0106305	0.000123	-4.49	1.17089	-1.18	ZNF664-FAM101A///FAM101A	filamin-interacting protein FAM101A///family with sequence similarity 101 member A
200701_at	0.0106305	0.000123	4.49	1.17088	0.698	NPC2	NPC intracellular cholesterol transporter 2
232653_at	0.0106394	0.000124	4.49	1.16761	0.577
217871_s_at	0.0106394	0.000124	4.49	1.1671	0.713	MIF	macrophage migration inhibitory factor (glycosylation-inhibiting factor)
204860_s_at	0.0106394	0.000124	4.49	1.16574	1.2	NAIP	NLR family apoptosis inhibitory protein
201753_s_at	0.0106786	0.000125	-4.49	1.16088	-0.846	ADD3	adducin 3
45526_g_at	0.0106901	0.000125	-4.49	1.15643	-0.461	NAA60	N(alpha)-acetyltransferase 60, NatF catalytic subunit
239512_at	0.0106901	0.000126	4.49	1.15471	0.775	SRSF4	serine and arginine rich splicing factor 4
243501_at	0.0106901	0.000126	-4.49	1.15382	-0.913	ATP5F1	ATP synthase, H+ transporting, mitochondrial Fo complex subunit B1
231478_at	0.0106901	0.000126	-4.48	1.15339	-0.663	LOC729966///PDE4C	uncharacterized LOC729966///phosphodiesterase 4C
234294_x_at	0.0106901	0.000126	-4.48	1.15268	-0.583	GATAD2A	GATA zinc finger domain containing 2A
224535_s_at	0.0107452	0.000127	4.48	1.14573	0.499	MRPL57	mitochondrial ribosomal protein L57
200866_s_at	0.0107452	0.000127	4.48	1.14402	0.661	PSAP	prosaposin
AFFX-r2-Bs-dap-5_at	0.0107452	0.000127	-4.48	1.14362	-0.883
205562_at	0.0108605	0.000129	-4.48	1.13231	-0.424	RPP38	ribonuclease P/MRP subunit p38
209820_s_at	0.0108617	0.000129	-4.48	1.13078	-0.462	TBL3	transducin beta like 3
208941_s_at	0.0109012	0.00013	4.47	1.126	0.395	SEPHS1	selenophosphate synthetase 1
214487_s_at	0.0109101	0.00013	4.47	1.12382	0.644	RAP2B///RAP2A	RAP2B, member of RAS oncogene family///RAP2A, member of RAS oncogene family
204787_at	0.0109979	0.000131	4.47	1.11498	1.55	VSIG4	V-set and immunoglobulin domain containing 4
206553_at	0.0110091	0.000131	4.47	1.11262	0.584	OAS2	2'-5'-oligoadenylate synthetase 2
212905_at	0.0111048	0.000133	-4.46	1.10146	-0.853	CSTF2T	cleavage stimulation factor subunit 2, tau variant
217360_x_at	0.0111048	0.000133	4.46	1.10039	1.53	IGHV4-31///IGHM///IGHG3///IGHG1///IGHA1	immunoglobulin heavy variable 4-31///immunoglobulin heavy constant mu///immunoglobulin heavy constant gamma 3 (G3m marker)///immunoglobulin heavy constant gamma 1 (G1m marker)///immunoglobulin heavy constant alpha 1
205312_at	0.0111048	0.000133	4.46	1.10037	0.495	SPI1	Spi-1 proto-oncogene
228096_at	0.0111192	0.000134	-4.46	1.09759	-0.632	MINOS1	mitochondrial inner membrane organizing system 1
207198_s_at	0.0111192	0.000134	4.46	1.09636	0.747	LIMS4///LIMS1	LIM zinc finger domain containing 4///LIM zinc finger domain containing 1
212533_at	0.0111385	0.000134	-4.46	1.09335	-0.626	WEE1	WEE1 G2 checkpoint kinase
213705_at	0.0111453	0.000135	-4.46	1.09138	-0.913	GGCX	gamma-glutamyl carboxylase
215111_s_at	0.0111528	0.000135	-4.46	1.08936	-0.699	TSC22D1	TSC22 domain family member 1
208594_x_at	0.0111786	0.000135	4.46	1.08582	0.559	LILRA6	leukocyte immunoglobulin like receptor A6
218689_at	0.011205	0.000136	-4.46	1.08224	-0.57	FANCF	Fanconi anemia complementation group F
222480_at	0.0112094	0.000136	-4.46	1.08049	-0.588	UBE2Q1	ubiquitin conjugating enzyme E2 Q1
223299_at	0.0112284	0.000137	4.45	1.07753	0.988	SEC11C	SEC11 homolog C, signal peptidase complex subunit
1560031_at	0.0112456	0.000137	4.45	1.07263	0.407	FRMD4A	FERM domain containing 4A
209453_at	0.0112456	0.000137	-4.45	1.07197	-0.576	SLC9A1	solute carrier family 9 member A1
215821_x_at	0.0112456	0.000138	4.45	1.0707	0.61	PSG11///PSG3	pregnancy specific beta-1-glycoprotein 11///pregnancy specific beta-1-glycoprotein 3
218565_at	0.0112456	0.000138	-4.45	1.0698	-0.55	SPOUT1	SPOUT domain containing methyltransferase 1
219517_at	0.0112456	0.000138	-4.45	1.06918	-0.871	ELL3	elongation factor for RNA polymerase II 3
224648_at	0.0112828	0.000138	-4.45	1.06474	-0.58	GPBP1	GC-rich promoter binding protein 1
227991_x_at	0.0112953	0.000139	-4.45	1.06234	-0.316	ZBTB43	zinc finger and BTB domain containing 43
211366_x_at	0.0113018	0.000139	4.45	1.06043	1.94	CASP1	caspase 1
232535_at	0.0113105	0.000139	-4.45	1.05835	-0.424	RSBN1L	round spermatid basic protein 1 like
200936_at	0.0113412	0.00014	-4.44	1.05446	-0.444	RPL8	ribosomal protein L8
232565_at	0.0113851	0.000141	4.44	1.04952	0.611
219978_s_at	0.0113949	0.000141	4.44	1.04726	1.13	NUSAP1	nucleolar and spindle associated protein 1
225361_x_at	0.0113949	0.000141	-4.44	1.04599	-0.584	FAM122B	family with sequence similarity 122B
1553678_a_at	0.0114408	0.000142	4.44	1.0409	0.517	ITGB1	integrin subunit beta 1
226032_at	0.0114564	0.000142	-4.44	1.03828	-0.433	CASP2	caspase 2
201875_s_at	0.0114977	0.000143	-4.44	1.03359	-0.351	MPZL1	myelin protein zero like 1
1558011_at	0.0115073	0.000144	4.44	1.03146	0.315	LOC441081	POM121 membrane glycoprotein (rat) pseudogene
212298_at	0.011524	0.000144	4.43	1.02877	1.28	NRP1	neuropilin 1
223397_s_at	0.0115325	0.000144	-4.43	1.02555	-0.762	NIP7	NIP7, nucleolar pre-rRNA processing protein
230005_at	0.0115325	0.000144	-4.43	1.02538	-0.416	SVIP	small VCP interacting protein
201506_at	0.0115816	0.000145	4.43	1.0201	1.74	TGFBI	transforming growth factor beta induced
200889_s_at	0.0116174	0.000146	4.43	1.01536	0.965	SSR1	signal sequence receptor subunit 1
238477_at	0.0116174	0.000146	-4.43	1.01333	-0.844	KIF1C	kinesin family member 1C
211881_x_at	0.0116174	0.000146	4.43	1.0132	2.4	IGLJ3	immunoglobulin lambda joining 3
216930_at	0.011647	0.000147	-4.43	1.00857	-0.365	HNF1A	HNF1 homeobox A
213975_s_at	0.011647	0.000147	4.43	1.00808	1.46	LYZ	lysozyme
44120_at	0.011647	0.000148	-4.43	1.00611	-0.439	ADCK2	aarF domain containing kinase 2
209438_at	0.011647	0.000148	-4.42	1.0055	-0.624	PHKA2	phosphorylase kinase regulatory subunit alpha 2
240509_s_at	0.0116938	0.000148	-4.42	1.00045	-0.785	GREM2	gremlin 2, DAN family BMP antagonist
239154_at	0.0117518	0.000149	-4.42	0.994104	-0.629
217961_at	0.0117518	0.00015	-4.42	0.992271	-0.558	SLC25A38	solute carrier family 25 member 38
217807_s_at	0.0117518	0.00015	-4.42	0.991887	-0.648	SNORD23///GLTSCR2	small nucleolar RNA, C/D box 23///glioma tumor suppressor candidate region gene 2
216829_at	0.0118007	0.000151	4.42	0.986719	2.58	IGK///IGKC	immunoglobulin kappa locus///immunoglobulin kappa constant
204700_x_at	0.0118088	0.000151	-4.42	0.983575	-0.778	DIEXF	digestive organ expansion factor homolog (zebrafish)
202446_s_at	0.0118088	0.000151	4.42	0.982557	0.484	PLSCR1	phospholipid scramblase 1
203468_at	0.0118088	0.000152	-4.42	0.981446	-0.634	CDK10	cyclin dependent kinase 10
217057_s_at	0.0118088	0.000152	-4.41	0.980796	-0.271	GNAS	GNAS complex locus
227528_s_at	0.0118329	0.000152	-4.41	0.97709	-0.584	KMT2D	lysine methyltransferase 2D
219892_at	0.0118329	0.000152	4.41	0.976279	0.611	TM6SF1	transmembrane 6 superfamily member 1
206120_at	0.0118698	0.000153	4.41	0.972082	0.496	CD33	CD33 molecule
226696_at	0.0118885	0.000154	-4.41	0.969312	-0.491	RBBP9	RB binding protein 9, serine hydrolase
212381_at	0.0119234	0.000154	-4.41	0.965291	-0.353	USP24	ubiquitin specific peptidase 24
218482_at	0.0119398	0.000155	4.41	0.962718	0.344	ENY2	ENY2, transcription and export complex 2 subunit
215520_at	0.0119399	0.000155	-4.41	0.96099	-0.241	PYGO1	pygopus family PHD finger 1
214395_x_at	0.0119399	0.000155	-4.41	0.960095	-0.706	EEF1D	eukaryotic translation elongation factor 1 delta
226298_at	0.0119663	0.000156	-4.41	0.956752	-0.515	RUNDC1	RUN domain containing 1
206845_s_at	0.0120394	0.000157	-4.4	0.949725	-0.304	RNF40	ring finger protein 40
224763_at	0.0120394	0.000157	-4.4	0.948517	-0.7	LOC100506548///RPL37	uncharacterized LOC100506548///ribosomal protein L37
218592_s_at	0.0120416	0.000158	-4.4	0.943405	-0.543	CECR5	cat eye syndrome chromosome region, candidate 5
206138_s_at	0.0120416	0.000158	-4.4	0.943021	-0.29	PI4KB	phosphatidylinositol 4-kinase beta
213635_s_at	0.0120416	0.000158	-4.4	0.941303	-0.354	SAFB	scaffold attachment factor B
226015_at	0.0120416	0.000159	-4.4	0.939638	-0.377	ZNF12	zinc finger protein 12
219041_s_at	0.0120416	0.000159	-4.4	0.939523	-0.537	REPIN1	replication initiator 1
222047_s_at	0.0120416	0.000159	-4.4	0.937623	-0.416	SRRT	serrate, RNA effector molecule
224674_at	0.0120416	0.000159	4.4	0.937074	0.634	TTYH3	tweety family member 3
221039_s_at	0.0120416	0.000159	4.4	0.936304	1.11	ASAP1	ArfGAP with SH3 domain, ankyrin repeat and PH domain 1
221743_at	0.0120416	0.000159	-4.4	0.934315	-0.342	CELF1	CUGBP, Elav-like family member 1
234950_s_at	0.0120416	0.000159	-4.4	0.934211	-0.372	RFWD2	ring finger and WD repeat domain 2
206171_at	0.0120416	0.00016	4.4	0.933748	0.984	ADORA3	adenosine A3 receptor
202251_at	0.0120416	0.00016	-4.4	0.932547	-0.383	PRPF3	pre-mRNA processing factor 3
226796_at	0.0120416	0.00016	-4.39	0.93146	-0.505	ABHD15	abhydrolase domain containing 15
218962_s_at	0.0120416	0.00016	-4.39	0.93036	-0.655	TMEM168	transmembrane protein 168
216606_x_at	0.0120417	0.00016	-4.39	0.92908	-0.375	LYPLA2	lysophospholipase II
226255_at	0.0120417	0.000161	-4.39	0.927065	-0.458	ZBTB33	zinc finger and BTB domain containing 33
205170_at	0.0120417	0.000161	4.39	0.926549	0.439	STAT2	signal transducer and activator of transcription 2
227778_at	0.0120684	0.000161	-4.39	0.923231	-0.396	MROH1	maestro heat like repeat family member 1
224999_at	0.012098	0.000162	-4.39	0.919699	-0.498	EGFR	epidermal growth factor receptor
208051_s_at	0.0121721	0.000163	-4.39	0.91228	-0.828	PAIP1	poly(A) binding protein interacting protein 1
227265_at	0.0121721	0.000164	4.39	0.90987	1	FGL2	fibrinogen like 2
225646_at	0.0121721	0.000164	4.39	0.909178	1.14	CTSC	cathepsin C
1554482_a_at	0.0121721	0.000164	4.39	0.909007	0.517	SAR1B	secretion associated Ras related GTPase 1B
203231_s_at	0.0121902	0.000165	4.38	0.90517	0.95	ATXN1	ataxin 1
201235_s_at	0.0121902	0.000165	4.38	0.90507	0.875	BTG2	BTG anti-proliferation factor 2
238078_at	0.0121902	0.000165	-4.38	0.903871	-0.504	SEC22A	SEC22 homolog A, vesicle trafficking protein
211557_x_at	0.0123715	0.000167	4.38	0.888963	0.595	SLCO2B1	solute carrier organic anion transporter family member 2B1
224502_s_at	0.0123924	0.000168	-4.38	0.886034	-0.431	KIAA1191	KIAA1191
219224_x_at	0.0123924	0.000168	-4.38	0.88491	-0.317	ZNF408	zinc finger protein 408
210337_s_at	0.0124009	0.000169	4.37	0.882796	0.488	ACLY	ATP citrate lyase
1557905_s_at	0.0124009	0.000169	4.37	0.880175	1.18	CD44	CD44 molecule (Indian blood group)
239489_at	0.0124009	0.000169	4.37	0.879573	0.421
216449_x_at	0.0124009	0.00017	4.37	0.877465	0.539	HSP90B1	heat shock protein 90 beta family member 1
203092_at	0.0124009	0.00017	-4.37	0.877128	-0.497	TIMM44	translocase of inner mitochondrial membrane 44
221597_s_at	0.0124009	0.00017	4.37	0.876327	0.433	TMEM208	transmembrane protein 208
221530_s_at	0.0124009	0.00017	-4.37	0.874321	-1.14	BHLHE41	basic helix-loop-helix family member e41
232205_at	0.0124009	0.000171	-4.37	0.87161	-0.454
229322_at	0.0124009	0.000171	-4.37	0.871427	-0.43	PPP2R5E	protein phosphatase 2 regulatory subunit B'epsilon
223297_at	0.0124009	0.000171	-4.37	0.870688	-0.618	AMMECR1L	AMMECR1 like
225056_at	0.0124009	0.000171	-4.37	0.87066	-0.803	SIPA1L2	signal induced proliferation associated 1 like 2
225432_s_at	0.012425	0.000171	-4.37	0.867312	-0.579	PET117///KAT14	PET117 homolog///lysine acetyltransferase 14
219593_at	0.012425	0.000172	4.37	0.866075	0.875	SLC15A3	solute carrier family 15 member 3
230739_at	0.012425	0.000172	-4.37	0.863307	-0.642	FAM210A	family with sequence similarity 210 member A
217846_at	0.012425	0.000172	-4.37	0.862048	-0.404	MIR6890///QARS	microRNA 6890///glutaminyl-tRNA synthetase
221060_s_at	0.012425	0.000172	4.37	0.861868	0.601	TLR4	toll like receptor 4
221795_at	0.012425	0.000172	-4.37	0.861528	-1.3	NTRK2	neurotrophic receptor tyrosine kinase 2
225492_at	0.0124397	0.000173	-4.37	0.858441	-0.705	TMEM33	transmembrane protein 33
206420_at	0.0124397	0.000173	4.36	0.858002	1.53	IGSF6	immunoglobulin superfamily member 6
224140_at	0.012448	0.000173	4.36	0.85617	0.322	NPCDR1	nasopharyngeal carcinoma, down-regulated 1
203932_at	0.012451	0.000174	4.36	0.854734	1.61	HLA-DMB	major histocompatibility complex, class II, DM beta
204928_s_at	0.0125098	0.000175	-4.36	0.849159	-0.429	SLC10A3	solute carrier family 10 member 3
213390_at	0.0125484	0.000176	-4.36	0.845099	-0.54	ZC3H4	zinc finger CCCH-type containing 4
238563_at	0.0126413	0.000177	4.36	0.836617	0.74
222678_s_at	0.0126413	0.000177	4.36	0.835865	0.784	DCUN1D1	defective in cullin neddylation 1 domain containing 1
202289_s_at	0.0126511	0.000178	-4.36	0.833943	-0.923	TACC2	transforming acidic coiled-coil containing protein 2
201859_at	0.012696	0.000179	4.35	0.829461	1.52	SRGN	serglycin
203652_at	0.0127221	0.000179	-4.35	0.826362	-0.358	MAP3K11	mitogen-activated protein kinase kinase kinase 11
227095_at	0.0127261	0.000179	-4.35	0.824872	-0.472	LEPROT	leptin receptor overlapping transcript
221568_s_at	0.0127578	0.00018	-4.35	0.820256	-0.564	LIN7C	lin-7 homolog C, crumbs cell polarity complex component
242714_at	0.0127578	0.00018	4.35	0.820177	0.279	LOC101928429	uncharacterized LOC101928429
232591_s_at	0.0127804	0.000181	4.35	0.817341	0.706	TMEM30A	transmembrane protein 30A
227388_at	0.0127984	0.000181	-4.35	0.814845	-0.713	TUSC1	tumor suppressor candidate 1
226925_at	0.0128782	0.000183	-4.34	0.807905	-0.653	PXYLP1	2-phosphoxylose phosphatase 1
228569_at	0.0128799	0.000183	-4.34	0.806592	-0.771	PAPOLA	poly(A) polymerase alpha
218280_x_at	0.0128968	0.000184	4.34	0.802987	0.941	HIST2H2AA4///HIST2H2AA3	histone cluster 2, H2aa4///histone cluster 2, H2aa3
203960_s_at	0.0128968	0.000184	4.34	0.801647	0.35	HSPB11	heat shock protein family B (small) member 11
216430_x_at	0.0128968	0.000184	4.34	0.801512	1.97	IGLV1-44	immunoglobulin lambda variable 1-44
211367_s_at	0.0128968	0.000184	4.34	0.800632	2	CASP1	caspase 1
219531_at	0.0129023	0.000185	4.34	0.799053	0.417	CEP72	centrosomal protein 72
229572_at	0.0129719	0.000186	-4.34	0.790746	-0.719	ATP6V0A2	ATPase H+ transporting V0 subunit a2
219800_s_at	0.0129719	0.000186	-4.34	0.790633	-0.418	THNSL1	threonine synthase like 1
227373_at	0.0129719	0.000186	-4.34	0.790536	-0.71	ATXN1L	ataxin 1 like
218712_at	0.0129793	0.000187	-4.34	0.786657	-0.51	C1orf109	chromosome 1 open reading frame 109
202256_at	0.0129793	0.000187	-4.34	0.785718	-0.326	CD2BP2	CD2 cytoplasmic tail binding protein 2
228710_at	0.0129793	0.000187	-4.33	0.784489	-0.646
218229_s_at	0.0129793	0.000187	-4.33	0.784467	-0.599	POGK	pogo transposable element with KRAB domain
AFFX-HSAC07/X00351_5_at	0.0129793	0.000188	4.33	0.784141	0.54	ACTB	actin beta
226805_at	0.0130157	0.000188	-4.33	0.780382	-0.564	FITM2	fat storage inducing transmembrane protein 2
225061_at	0.0130272	0.000189	-4.33	0.778393	-0.675	DNAJA4	DnaJ heat shock protein family (Hsp40) member A4
236492_at	0.0130422	0.000189	4.33	0.775931	0.589	PPP2R2A	protein phosphatase 2 regulatory subunit Balpha
244042_x_at	0.0130422	0.000189	-4.33	0.774999	-0.524
239889_at	0.0130962	0.000191	-4.33	0.768895	-0.268	SERP2	stress-associated endoplasmic reticulum protein family member 2
229105_at	0.0130962	0.000191	-4.33	0.768847	-0.944	GPR39	G protein-coupled receptor 39
214070_s_at	0.0131064	0.000191	-4.33	0.766969	-0.476	ATP10B	ATPase phospholipid transporting 10B (putative)
224838_at	0.0131452	0.000192	-4.33	0.763073	-0.528	FOXP1	forkhead box P1
224357_s_at	0.0131527	0.000192	4.33	0.761391	0.588	MS4A4A	membrane spanning 4-domains A4A
222451_s_at	0.0131822	0.000193	-4.32	0.758162	-0.585	ZDHHC9	zinc finger DHHC-type containing 9
222589_at	0.0132068	0.000193	-4.32	0.755285	-0.541	NLK	nemo like kinase
228271_at	0.0132267	0.000194	4.32	0.752739	0.614
207529_at	0.0132288	0.000194	4.32	0.751173	4.4	DEFA5	defensin alpha 5
211761_s_at	0.0132288	0.000195	-4.32	0.750291	-0.614	CACYBP	calcyclin binding protein
218040_at	0.0132318	0.000195	-4.32	0.748931	-0.626	PRPF38B	pre-mRNA processing factor 38B
208741_at	0.0132602	0.000195	-4.32	0.745798	-0.399	SAP18	Sin3A associated protein 18
212857_x_at	0.0134343	0.000198	4.31	0.731704	0.408	SUB1	SUB1 homolog, transcriptional regulator
209040_s_at	0.0134343	0.000199	4.31	0.729968	0.93	PSMB8	proteasome subunit beta 8
225330_at	0.0134343	0.000199	-4.31	0.729817	-0.756	IGF1R	insulin like growth factor 1 receptor
1554078_s_at	0.0134343	0.000199	-4.31	0.729161	-0.662	DNAJA3	DnaJ heat shock protein family (Hsp40) member A3
244187_at	0.0134707	0.0002	-4.31	0.72438	-1.12
235384_at	0.0134707	0.0002	-4.31	0.72356	-0.513	NUDT19	nudix hydrolase 19
222681_at	0.0134707	0.0002	-4.31	0.723241	-0.744	POGLUT1	protein O-glucosyltransferase 1
204148_s_at	0.0134739	0.000201	-4.31	0.721714	-1.27	POMZP3///ZP3	POM121 and ZP3 fusion///zona pellucida glycoprotein 3 (sperm receptor)
226534_at	0.0134739	0.000201	-4.31	0.719975	-0.629	KITLG	KIT ligand
218164_at	0.0134739	0.000201	-4.31	0.719614	-0.684	SPATA20	spermatogenesis associated 20
222103_at	0.0135542	0.000203	-4.31	0.71299	-0.456	ATF1	activating transcription factor 1
226987_at	0.0135632	0.000203	-4.31	0.711242	-0.452	RBM15B	RNA binding motif protein 15B
212215_at	0.0135949	0.000204	-4.3	0.707956	-0.42	PREPL	prolyl endopeptidase-like
222429_at	0.0136019	0.000204	4.3	0.706348	0.254	MIR6837///DBNL	microRNA 6837///drebrin like
203214_x_at	0.013619	0.000205	4.3	0.70222	0.954	CDK1	cyclin dependent kinase 1
212761_at	0.013619	0.000205	-4.3	0.701838	-0.649	TCF7L2	transcription factor 7 like 2
221702_s_at	0.013619	0.000205	-4.3	0.701811	-0.355	TM2D3	TM2 domain containing 3
1570182_at	0.0136255	0.000205	-4.3	0.700249	-0.247	LOC101927539	uncharacterized LOC101927539
239180_at	0.0136285	0.000206	-4.3	0.698925	-0.312	MMP25-AS1	MMP25 antisense RNA 1
224701_at	0.0136692	0.000207	4.3	0.694472	1.12	PARP14	poly(ADP-ribose) polymerase family member 14
230056_at	0.0136692	0.000207	-4.3	0.693928	-0.289	BPTF	bromodomain PHD finger transcription factor
212317_at	0.0137126	0.000208	-4.3	0.689878	-0.246	TNPO3	transportin 3
1562459_at	0.0137221	0.000208	-4.3	0.688123	-0.191
225989_at	0.0137685	0.000209	-4.29	0.683886	-0.626	HERC4	HECT and RLD domain containing E3 ubiquitin protein ligase 4
212945_s_at	0.0138204	0.00021	-4.29	0.679289	-0.442	MGA	MGA, MAX dimerization protein
208827_at	0.0138204	0.00021	4.29	0.678188	0.381	PSMB6	proteasome subunit beta 6
222499_at	0.0138556	0.000211	-4.29	0.67462	-0.423	MRPS16	mitochondrial ribosomal protein S16
220277_at	0.0138556	0.000211	4.29	0.673611	0.442	CXXC4	CXXC finger protein 4
243426_at	0.0140082	0.000214	-4.28	0.661482	-0.604	LINC00667	long intergenic non-protein coding RNA 667
217779_s_at	0.0140082	0.000214	-4.28	0.661276	-0.511	PNRC2	proline rich nuclear receptor coactivator 2
201034_at	0.0140182	0.000215	-4.28	0.658718	-0.67	ADD3	adducin 3
244647_at	0.0140182	0.000215	-4.28	0.658403	-0.571	WBP11	WW domain binding protein 11
227042_at	0.0140596	0.000216	-4.28	0.654576	-0.417	YDJC	YdjC homolog (bacterial)
213537_at	0.0141125	0.000217	4.28	0.650005	1.77	HLA-DPA1	major histocompatibility complex, class II, DP alpha 1
221207_s_at	0.0141722	0.000218	-4.28	0.643071	-0.641	NBEA	neurobeachin
200075_s_at	0.0141722	0.000218	4.28	0.642941	0.475	GUK1	guanylate kinase 1
209970_x_at	0.0141722	0.000219	4.28	0.642803	1.83	CASP1	caspase 1
202038_at	0.0141899	0.000219	-4.28	0.640554	-0.296	UBE4A	ubiquitination factor E4A
224586_x_at	0.0142082	0.00022	4.28	0.638268	0.414	SUB1	SUB1 homolog, transcriptional regulator
215354_s_at	0.0142095	0.00022	-4.27	0.634891	-0.412	PELP1	proline, glutamate and leucine rich protein 1
1562788_at	0.0142095	0.000221	-4.27	0.634178	-0.324	LINC01342	long intergenic non-protein coding RNA 1342
229371_at	0.0142095	0.000221	-4.27	0.633925	-1.05	SLC20A2	solute carrier family 20 member 2
204781_s_at	0.0142095	0.000221	-4.27	0.633818	-0.704	FAS	Fas cell surface death receptor
218019_s_at	0.0142202	0.000221	-4.27	0.632033	-0.407	PDXK	pyridoxal (pyridoxine, vitamin B6) kinase
201906_s_at	0.014275	0.000222	-4.27	0.626432	-0.805	CTDSPL	CTD small phosphatase like
230479_at	0.014275	0.000223	-4.27	0.625333	-0.628	EIF3F	eukaryotic translation initiation factor 3 subunit F
212998_x_at	0.014275	0.000223	4.27	0.62415	2.1	LOC101060835///HLA-DQB1	HLA class II histocompatibility antigen, DQ beta 1 chain-like///major histocompatibility complex, class II, DQ beta 1
218302_at	0.014275	0.000223	4.27	0.624138	0.487	PSENEN	presenilin enhancer gamma-secretase subunit
236700_at	0.0142793	0.000223	-4.27	0.622323	-0.87	EIF3C	eukaryotic translation initiation factor 3 subunit C
229473_at	0.0142793	0.000224	-4.27	0.621696	-0.614	MAMDC4	MAM domain containing 4
227191_at	0.0143573	0.000225	-4.27	0.614629	-0.602	ITFG1	integrin alpha FG-GAP repeat containing 1
226470_at	0.0143573	0.000225	-4.27	0.614507	-0.575	GGT7	gamma-glutamyltransferase 7
201532_at	0.0144087	0.000226	4.26	0.610128	0.666	PSMA3	proteasome subunit alpha 3
205433_at	0.0144415	0.000227	-4.26	0.606948	-1.1	BCHE	butyrylcholinesterase
224626_at	0.0145934	0.00023	-4.26	0.595998	-0.474	SLC35A4	solute carrier family 35 member A4
211633_x_at	0.0145934	0.00023	4.26	0.595132	2.54
223051_at	0.0146464	0.000231	-4.26	0.590705	-0.502	SSU72	SSU72 homolog, RNA polymerase II CTD phosphatase
207820_at	0.0147113	0.000232	-4.25	0.585549	-0.583	ADH1A	alcohol dehydrogenase 1A (class I), alpha polypeptide
224630_at	0.0147222	0.000233	4.25	0.583754	0.781	ERLEC1	endoplasmic reticulum lectin 1
238846_at	0.0147222	0.000233	-4.25	0.582731	-1.1	TNFRSF11A	TNF receptor superfamily member 11a
210622_x_at	0.0147274	0.000234	-4.25	0.581336	-0.589	CDK10	cyclin dependent kinase 10
208142_at	0.0147296	0.000234	-4.25	0.58013	-0.239	EDDM3A	epididymal protein 3A
221509_at	0.014743	0.000234	-4.25	0.578225	-0.379	DENR	density regulated re-initiation and release factor
1554208_at	0.0148489	0.000236	4.25	0.570551	0.819	MEI1	meiotic double-stranded break formation protein 1
223282_at	0.0148632	0.000237	-4.25	0.568599	-1.01	TSHZ1	teashirt zinc finger homeobox 1
222561_at	0.0148786	0.000237	-4.25	0.566583	-0.403	LANCL2	LanC like 2
217866_at	0.0148976	0.000238	-4.25	0.564341	-0.417	CPSF7	cleavage and polyadenylation specific factor 7
236537_at	0.0149193	0.000238	-4.24	0.56194	-0.506
239847_at	0.0149322	0.000239	-4.24	0.559775	-0.657
211336_x_at	0.0149322	0.000239	4.24	0.558553	0.631	LILRB1	leukocyte immunoglobulin like receptor B1
201032_at	0.0149322	0.00024	-4.24	0.557974	-0.449	BLCAP	bladder cancer associated protein
1552703_s_at	0.0149961	0.000241	4.24	0.552972	1.59	CARD16///CASP1	caspase recruitment domain family member 16///caspase 1
217811_at	0.0150249	0.000242	4.24	0.548849	0.419	SELT	selenoprotein T
211640_x_at	0.0150249	0.000242	4.24	0.547898	2.69	IGHM///IGHG1	immunoglobulin heavy constant mu///immunoglobulin heavy constant gamma 1 (G1m marker)
230009_at	0.0150249	0.000242	-4.24	0.54714	-0.85	FAM118B	family with sequence similarity 118 member B
210852_s_at	0.0150249	0.000243	4.24	0.54601	0.303	AASS	aminoadipate-semialdehyde synthase
208523_x_at	0.0150249	0.000243	4.24	0.545954	0.548	HIST1H2BC///HIST1H2BI///HIST1H2BE///HIST1H2BF///HIST1H2BG	histone cluster 1, H2bc///histone cluster 1, H2bi///histone cluster 1, H2be///histone cluster 1, H2bf///histone cluster 1, H2bg
208823_s_at	0.0150347	0.000243	-4.24	0.544179	-0.333	CDK16	cyclin dependent kinase 16
223403_s_at	0.0150347	0.000243	-4.24	0.543257	-0.929	POLR1B	RNA polymerase I subunit B
219481_at	0.0150737	0.000244	-4.24	0.539821	-0.665	TTC13	tetratricopeptide repeat domain 13
213022_s_at	0.015092	0.000245	4.23	0.536276	0.612	UTRN	utrophin
207350_s_at	0.015092	0.000245	4.23	0.536168	0.675	VAMP4	vesicle associated membrane protein 4
225618_at	0.015092	0.000246	-4.23	0.533711	-0.431	ARHGAP27	Rho GTPase activating protein 27
229952_at	0.015092	0.000246	-4.23	0.532904	-0.65	PLEKHG3	pleckstrin homology and RhoGEF domain containing G3
212717_at	0.015092	0.000246	-4.23	0.532465	-0.501	PLEKHM1	pleckstrin homology and RUN domain containing M1
207002_s_at	0.015092	0.000246	-4.23	0.532462	-0.637	PLAGL1	PLAG1 like zinc finger 1
213714_at	0.015096	0.000247	-4.23	0.531184	-0.682	CACNB2	calcium voltage-gated channel auxiliary subunit beta 2
1557452_at	0.0151043	0.000247	4.23	0.52964	0.357
213567_at	0.0151536	0.000248	-4.23	0.525593	-0.572	KPNA4	karyopherin subunit alpha 4
226640_at	0.0152654	0.00025	-4.23	0.517773	-0.422	DAGLB	diacylglycerol lipase beta
221506_s_at	0.0152707	0.000251	-4.23	0.515547	-0.397	TNPO2	transportin 2
227093_at	0.0152707	0.000251	-4.23	0.51539	-0.797	USP36	ubiquitin specific peptidase 36
218158_s_at	0.0153345	0.000252	-4.22	0.5102	-0.786	APPL1	adaptor protein, phosphotyrosine interacting with PH domain and leucine zipper 1
243039_at	0.0153345	0.000253	4.22	0.508778	0.371
222431_at	0.0153345	0.000253	-4.22	0.508456	-0.373	SPIN1	spindlin 1
210002_at	0.0153628	0.000253	-4.22	0.505724	-1.04	GATA6	GATA binding protein 6
201365_at	0.0153798	0.000254	4.22	0.503679	0.494	OAZ2	ornithine decarboxylase antizyme 2
204858_s_at	0.0153844	0.000254	4.22	0.502382	0.938	TYMP	thymidine phosphorylase
1569954_at	0.0153937	0.000255	-4.22	0.500613	-0.212	LOC101928834	uncharacterized LOC101928834
200922_at	0.0153937	0.000255	4.22	0.499777	0.433	KDELR1	KDEL endoplasmic reticulum protein retention receptor 1
205808_at	0.0154211	0.000256	4.22	0.497117	0.51	ASPH	aspartate beta-hydroxylase
225356_at	0.0154908	0.000257	-4.22	0.491932	-0.374	SFT2D2	SFT2 domain containing 2
1559502_s_at	0.015497	0.000258	4.21	0.490545	0.63	LRRC25	leucine rich repeat containing 25
205071_x_at	0.0155181	0.000259	4.21	0.486949	0.633	XRCC4	X-ray repair cross complementing 4
220305_at	0.0155181	0.000259	-4.21	0.485464	-0.702	MAVS	mitochondrial antiviral signaling protein
219363_s_at	0.0155181	0.000259	-4.21	0.484125	-0.442	MTERF3	mitochondrial transcription termination factor 3
210191_s_at	0.0155181	0.00026	4.21	0.483122	0.798	PHTF1	putative homeodomain transcription factor 1
235850_at	0.0155181	0.00026	-4.21	0.483089	-1.41	FAM162A	family with sequence similarity 162 member A
227477_at	0.0155181	0.00026	-4.21	0.483053	-0.599	ZMYND19	zinc finger MYND-type containing 19
203611_at	0.0155181	0.00026	-4.21	0.481589	-0.475	TERF2	telomeric repeat binding factor 2
212051_at	0.0155181	0.00026	-4.21	0.48119	-0.505	WIPF2	WAS/WASL interacting protein family member 2
201978_s_at	0.0155449	0.000261	-4.21	0.478298	-0.409	KIAA0141	KIAA0141
234998_at	0.0155449	0.000261	-4.21	0.477582	-0.739	RAB11A	RAB11A, member RAS oncogene family
240655_at	0.0156131	0.000263	4.21	0.472534	0.582
203418_at	0.0156208	0.000263	4.21	0.471076	1.11	CCNA2	cyclin A2
215030_at	0.015622	0.000263	-4.21	0.469999	-1.05	GRSF1	G-rich RNA sequence binding factor 1
239230_at	0.0156252	0.000264	-4.21	0.468565	-0.479	HES5	hes family bHLH transcription factor 5
210628_x_at	0.0156252	0.000264	-4.21	0.466921	-0.522	LTBP4	latent transforming growth factor beta binding protein 4
208734_x_at	0.0156252	0.000264	4.21	0.466809	0.412	RAB2A	RAB2A, member RAS oncogene family
219506_at	0.015709	0.000266	4.2	0.460152	1.11	C1orf54	chromosome 1 open reading frame 54
226204_at	0.015709	0.000266	-4.2	0.459874	-0.551	C22orf29///GNB1L	chromosome 22 open reading frame 29///G protein subunit beta 1 like
241741_at	0.015807	0.000268	-4.2	0.453133	-0.784	CRLS1	cardiolipin synthase 1
219178_at	0.0158094	0.000269	-4.2	0.451995	-0.604	QTRT2	queuine tRNA-ribosyltransferase accessory subunit 2
235085_at	0.0158339	0.000269	-4.2	0.449571	-1.16	SGK223	homolog of rat pragma of Rnd2
219125_s_at	0.0159383	0.000271	4.2	0.442505	0.56	SLC50A1	solute carrier family 50 member 1
210992_x_at	0.0159975	0.000273	4.19	0.438091	1.32	FCGR2C	Fc fragment of IgG receptor IIc (gene/pseudogene)
207104_x_at	0.0160193	0.000273	4.19	0.435843	0.597	LILRB1	leukocyte immunoglobulin like receptor B1
220961_s_at	0.01602	0.000274	-4.19	0.434808	-0.452	TBRG4	transforming growth factor beta regulator 4
221135_s_at	0.016141	0.000276	-4.19	0.425369	-0.689	ASTE1	asteroid homolog 1 (Drosophila)
222683_at	0.016141	0.000277	-4.19	0.425078	-0.419	RNF20	ring finger protein 20
218463_s_at	0.016141	0.000277	-4.19	0.424898	-0.365	MUS81	MUS81 structure-specific endonuclease subunit
211100_x_at	0.0161498	0.000277	4.19	0.422803	0.395	LILRA2	leukocyte immunoglobulin like receptor A2
227482_at	0.0161498	0.000278	-4.19	0.420595	-0.279	ADCK1	aarF domain containing kinase 1
204294_at	0.0161498	0.000278	-4.19	0.420142	-0.754	AMT	aminomethyltransferase
239775_at	0.0161498	0.000278	-4.19	0.42001	-0.329	LOC101927609	uncharacterized LOC101927609
228611_s_at	0.0161498	0.000278	-4.19	0.419226	-0.363
213223_at	0.0161498	0.000279	-4.18	0.417129	-0.455	MIR6805///RPL28	microRNA 6805///ribosomal protein L28
201081_s_at	0.0161498	0.000279	4.18	0.415565	0.398	PIP4K2B	phosphatidylinositol-5-phosphate 4-kinase type 2 beta
224758_at	0.0161498	0.00028	-4.18	0.415089	-0.581	C7orf73	chromosome 7 open reading frame 73
243278_at	0.0161498	0.00028	-4.18	0.414807	-0.807	FOXP2	forkhead box P2
225583_at	0.0161498	0.00028	-4.18	0.413157	-0.405	UXS1	UDP-glucuronate decarboxylase 1
204174_at	0.0161498	0.00028	4.18	0.41313	0.985	ALOX5AP	arachidonate 5-lipoxygenase activating protein
201421_s_at	0.0161498	0.00028	-4.18	0.412635	-0.592	WDR77	WD repeat domain 77
210264_at	0.0161747	0.000281	-4.18	0.41024	-0.486	GPR35	G protein-coupled receptor 35
204533_at	0.0162571	0.000283	4.18	0.404007	2.33	CXCL10	C-X-C motif chemokine ligand 10
221463_at	0.0162571	0.000283	4.18	0.403259	1.12	CCL24	C-C motif chemokine ligand 24
210792_x_at	0.0162571	0.000284	4.18	0.400858	0.321	SIVA1	SIVA1 apoptosis inducing factor
218066_at	0.0162571	0.000284	-4.18	0.399569	-0.411	SLC12A7	solute carrier family 12 member 7
223166_x_at	0.0162571	0.000285	-4.18	0.398197	-0.336	RABL6	RAB, member RAS oncogene family-like 6
204366_s_at	0.0162571	0.000285	-4.18	0.397829	-0.403	GTF3C2	general transcription factor IIIC subunit 2
1562013_a_at	0.0162571	0.000285	-4.18	0.396897	-0.731	LOC100506730	uncharacterized LOC100506730
204530_s_at	0.0162571	0.000285	-4.18	0.39586	-0.303	TOX	thymocyte selection associated high mobility group box
223183_at	0.0162571	0.000286	-4.18	0.394834	-0.651	AGPAT3	1-acylglycerol-3-phosphate O-acyltransferase 3
227341_at	0.0162571	0.000286	-4.18	0.39482	-0.967	BEND7	BEN domain containing 7
224780_at	0.0162571	0.000286	-4.18	0.393972	-0.587	RBM17	RNA binding motif protein 17
239043_at	0.0162571	0.000286	-4.18	0.393951	-0.452	ZNF404	zinc finger protein 404
204270_at	0.0162765	0.000287	-4.17	0.391889	-0.445	SKI	SKI proto-oncogene
210594_x_at	0.0163648	0.000289	4.17	0.385457	0.436	MPZL1	myelin protein zero like 1
227630_at	0.0163648	0.000289	-4.17	0.384978	-0.617	PPP2R5E	protein phosphatase 2 regulatory subunit B'epsilon
234419_x_at	0.0163875	0.00029	4.17	0.381225	1.36	LOC100293211///IGHV4-31///IGHM///IGHG3///IGHG1///IGHA1	uncharacterized LOC100293211///immunoglobulin heavy variable 4-31///immunoglobulin heavy constant mu///immunoglobulin heavy constant gamma 3 (G3m marker)///immunoglobulin heavy constant gamma 1 (G1m marker)///immunoglobulin heavy constant alpha 1
221567_at	0.0163875	0.00029	-4.17	0.380898	-0.411	NOL3	nucleolar protein 3
235467_s_at	0.0163875	0.00029	-4.17	0.380829	-0.579	KCNC4	potassium voltage-gated channel subfamily C member 4
230855_at	0.0164468	0.000292	-4.17	0.375695	-0.346	GATA4	GATA binding protein 4
207943_x_at	0.0164468	0.000292	-4.17	0.375587	-0.63	PLAGL1	PLAG1 like zinc finger 1
212194_s_at	0.0164969	0.000293	4.17	0.370288	0.491	TM9SF4	transmembrane 9 superfamily member 4
223910_at	0.0164969	0.000294	-4.17	0.3688	-0.346	ERN2	endoplasmic reticulum to nucleus signaling 2
205624_at	0.0164969	0.000294	4.16	0.368515	1.77	CPA3	carboxypeptidase A3
1555154_a_at	0.0164969	0.000294	4.16	0.368052	0.598	QKI	QKI, KH domain containing RNA binding
219283_at	0.0164969	0.000294	4.16	0.368027	0.418	C1GALT1C1	C1GALT1 specific chaperone 1
207023_x_at	0.0165143	0.000295	-4.16	0.366109	-0.528	KRT10	keratin 10
221648_s_at	0.0165719	0.000296	-4.16	0.361502	-1.01	AGMAT	agmatinase
227105_at	0.0165719	0.000296	-4.16	0.361	-0.629	CSPP1	centrosome and spindle pole associated protein 1
201400_at	0.0166132	0.000298	4.16	0.356927	0.295	PSMB3	proteasome subunit beta 3
228084_at	0.0166132	0.000298	-4.16	0.356813	-0.96	PLA2G12A	phospholipase A2 group XIIA
216508_x_at	0.0166307	0.000298	4.16	0.354898	0.428
1555935_s_at	0.0166366	0.000299	-4.16	0.353634	-0.693	HUNK	hormonally up-regulated Neu-associated kinase
216316_x_at	0.0166728	0.0003	4.16	0.350169	0.491	GK6P	glycerol kinase 6 pseudogene
219118_at	0.0166728	0.0003	4.16	0.349747	2	FKBP11	FK506 binding protein 11
212367_at	0.0166808	0.000301	-4.16	0.348363	-0.585	FEM1B	fem-1 homolog B
212395_s_at	0.0167093	0.000302	-4.16	0.344836	-0.463	EMC1	ER membrane protein complex subunit 1
1558027_s_at	0.0167093	0.000302	-4.16	0.344509	-0.539	PRKAB2	protein kinase AMP-activated non-catalytic subunit beta 2
203208_s_at	0.0167093	0.000302	-4.15	0.343981	-0.518	MTFR1	mitochondrial fission regulator 1
223655_at	0.016713	0.000303	4.15	0.342164	0.933	CD163L1	CD163 molecule like 1
205098_at	0.016713	0.000303	4.15	0.341906	1.21	CCR1	C-C motif chemokine receptor 1
240446_at	0.0167203	0.000303	4.15	0.340569	0.469
242871_at	0.0167235	0.000303	-4.15	0.339461	-1.43	PAQR5	progestin and adipoQ receptor family member 5
218977_s_at	0.0167509	0.000304	4.15	0.337018	0.421	TRNAU1AP	tRNA selenocysteine 1 associated protein 1
233952_s_at	0.0167836	0.000305	-4.15	0.334289	-0.689	ZBTB21	zinc finger and BTB domain containing 21
AFFX-r2-Ec-bioD-3_at	0.0167991	0.000307	-4.15	0.329864	-0.341
234306_s_at	0.0167991	0.000307	4.15	0.329825	1.33	SLAMF7	SLAM family member 7
211287_x_at	0.0167991	0.000307	4.15	0.329074	0.429	CSF2RA	colony stimulating factor 2 receptor alpha subunit
210188_at	0.0167991	0.000307	4.15	0.328829	0.583	GABPA	GA binding protein transcription factor alpha subunit
228012_at	0.0167991	0.000307	-4.15	0.328801	-0.601	SNHG4///MATR3	small nucleolar RNA host gene 4///matrin 3
1563087_at	0.0168032	0.000307	-4.15	0.3274	-0.201
217192_s_at	0.0168032	0.000308	4.15	0.325826	0.998	PRDM1	PR/SET domain 1
1555167_s_at	0.0168032	0.000308	4.15	0.325806	1.18	NAMPT	nicotinamide phosphoribosyltransferase
230711_at	0.0169205	0.00031	4.14	0.318446	0.444
213285_at	0.0169205	0.000311	-4.14	0.317543	-0.899	TMEM30B	transmembrane protein 30B
222401_s_at	0.0169244	0.000311	4.14	0.316412	0.372	TMEM50A	transmembrane protein 50A
221214_s_at	0.0169707	0.000312	-4.14	0.312968	-0.486	MIR7114///NSMF	microRNA 7114///NMDA receptor synaptonuclear signaling and neuronal migration factor
200096_s_at	0.0169892	0.000313	4.14	0.311044	0.275	ATP6V0E1	ATPase H+ transporting V0 subunit e1
227075_at	0.01704	0.000315	-4.14	0.305541	-0.586	ELP3	elongator acetyltransferase complex subunit 3
217356_s_at	0.01704	0.000315	4.14	0.305476	0.5	PGK1	phosphoglycerate kinase 1
207727_s_at	0.01704	0.000315	-4.14	0.304156	-0.458	MUTYH	mutY DNA glycosylase
1554768_a_at	0.01704	0.000316	4.14	0.302075	0.983	MAD2L1	MAD2 mitotic arrest deficient-like 1 (yeast)
229158_at	0.01704	0.000316	-4.14	0.301305	-1.17	WNK4	WNK lysine deficient protein kinase 4
210740_s_at	0.01704	0.000316	-4.14	0.300862	-0.288	ITPK1	inositol-tetrakisphosphate 1-kinase
206686_at	0.01704	0.000317	4.14	0.30008	1.17	PDK1	pyruvate dehydrogenase kinase 1
230156_x_at	0.01704	0.000317	-4.14	0.299442	-0.389	LINC01578	long intergenic non-protein coding RNA 1578
212110_at	0.01704	0.000317	-4.14	0.299176	-0.611	SLC39A14	solute carrier family 39 member 14
212090_at	0.01704	0.000317	4.14	0.29908	0.587	GRINA	glutamate ionotropic receptor NMDA type subunit associated protein 1
224697_at	0.01704	0.000318	-4.14	0.297356	-0.357	DCAF5	DDB1 and CUL4 associated factor 5
218082_s_at	0.01704	0.000318	-4.14	0.295941	-0.371	UBP1	upstream binding protein 1 (LBP-1a)
234989_at	0.01704	0.000318	4.14	0.295603	1.24	MIR612///NEAT1	microRNA 612///nuclear paraspeckle assembly transcript 1 (non-protein coding)
219358_s_at	0.01704	0.000318	4.14	0.295536	0.443	ADAP2	ArfGAP with dual PH domains 2
200662_s_at	0.0171225	0.00032	-4.13	0.290132	-0.551	TOMM20	translocase of outer mitochondrial membrane 20
216347_s_at	0.0171225	0.000321	-4.13	0.288877	-0.467	PPP1R13B	protein phosphatase 1 regulatory subunit 13B
201704_at	0.0171225	0.000321	-4.13	0.288371	-0.647	ENTPD6	ectonucleoside triphosphate diphosphohydrolase 6 (putative)
223353_at	0.0171306	0.000321	-4.13	0.286707	-0.268	MOB2	MOB kinase activator 2
208745_at	0.0171306	0.000321	-4.13	0.286132	-0.631	ATP5L	ATP synthase, H+ transporting, mitochondrial Fo complex subunit G
214800_x_at	0.0171358	0.000322	-4.13	0.284952	-0.394	BTF3	basic transcription factor 3
239274_at	0.0171655	0.000323	4.13	0.282455	0.612
224188_s_at	0.0171905	0.000324	4.13	0.280212	0.29	XPNPEP3	X-prolyl aminopeptidase 3
210108_at	0.0172104	0.000324	-4.13	0.278247	-0.85	CACNA1D	calcium voltage-gated channel subunit alpha1 D
1552797_s_at	0.0172195	0.000325	-4.13	0.276861	-0.859	PROM2	prominin 2
209507_at	0.017232	0.000325	4.13	0.275299	0.432	RPA3	replication protein A3
228864_at	0.0172469	0.000326	-4.13	0.273605	-0.409	ZNF653	zinc finger protein 653
AFFX-r2-P1-cre-5_at	0.0173057	0.000327	-4.12	0.26957	-0.378
1558088_a_at	0.0173397	0.000328	-4.12	0.266864	-0.323	UBE2I	ubiquitin conjugating enzyme E2 I
212014_x_at	0.0173412	0.000329	4.12	0.265891	1.18	CD44	CD44 molecule (Indian blood group)
225543_at	0.0173814	0.00033	-4.12	0.262865	-0.396	GTF3C4	general transcription factor IIIC subunit 4
202659_at	0.0173883	0.00033	4.12	0.261563	0.776	PSMB10	proteasome subunit beta 10
205116_at	0.0173883	0.00033	4.12	0.26072	0.587	LAMA2	laminin subunit alpha 2
224025_s_at	0.0174204	0.000332	4.12	0.25617	0.399	ATG7	autophagy related 7
214753_at	0.0174204	0.000332	4.12	0.255512	0.703	N4BP2L2	NEDD4 binding protein 2 like 2
228623_at	0.0174204	0.000333	4.12	0.254784	1.02
215693_x_at	0.0174204	0.000333	-4.12	0.254644	-0.462	DDX27	DEAD-box helicase 27
219551_at	0.0174204	0.000333	4.12	0.253254	1.61	EAF2	ELL associated factor 2
41160_at	0.0174204	0.000333	-4.12	0.252864	-0.374	MBD3	methyl-CpG binding domain protein 3
224820_at	0.0174204	0.000333	-4.12	0.252819	-0.515	COX20	COX20, cytochrome c oxidase assembly factor
221741_s_at	0.0174402	0.000334	-4.12	0.250885	-0.456	YTHDF1	YTH N6-methyladenosine RNA binding protein 1
235923_at	0.0174509	0.000334	4.12	0.249438	0.513	VTI1A	vesicle transport through interaction with t-SNAREs 1A
222516_at	0.0174606	0.000335	-4.12	0.24738	-0.323	AP3M1	adaptor related protein complex 3 mu 1 subunit
223507_at	0.0174606	0.000336	-4.11	0.245204	-0.526	CLPX	caseinolytic mitochondrial matrix peptidase chaperone subunit
201778_s_at	0.0174606	0.000336	-4.11	0.244678	-0.447	EFCAB14	EF-hand calcium binding domain 14
228443_s_at	0.0174606	0.000336	-4.11	0.244641	-0.438	KMT5A	lysine methyltransferase 5A
230053_at	0.0174606	0.000336	-4.11	0.244533	-1.32
212429_s_at	0.0174647	0.000337	-4.11	0.243437	-0.427	GTF3C2	general transcription factor IIIC subunit 2
226137_at	0.0175575	0.000339	-4.11	0.237667	-0.681	ZFHX3	zinc finger homeobox 3
200935_at	0.0175678	0.000339	4.11	0.236256	0.863	CALR	calreticulin
206059_at	0.0175789	0.00034	-4.11	0.234794	-1.19	ZNF91	zinc finger protein 91
216853_x_at	0.0176209	0.000341	4.11	0.231209	2.46	IGLJ3	immunoglobulin lambda joining 3
203923_s_at	0.0176209	0.000341	4.11	0.230848	1.11	CYBB	cytochrome b-245 beta chain
1555756_a_at	0.0176237	0.000342	4.11	0.229829	1.19	CLEC7A	C-type lectin domain family 7 member A
231926_at	0.0176372	0.000342	-4.11	0.227939	-0.537	EPS15L1	epidermal growth factor receptor pathway substrate 15 like 1
221587_s_at	0.0176372	0.000343	-4.11	0.227381	-0.425	C19orf24	chromosome 19 open reading frame 24
211368_s_at	0.0176403	0.000343	4.11	0.226352	2	CASP1	caspase 1
203608_at	0.0176407	0.000343	-4.11	0.225187	-1.22	ALDH5A1	aldehyde dehydrogenase 5 family member A1
210624_s_at	0.0176407	0.000344	-4.11	0.224595	-0.617	ILVBL	ilvB acetolactate synthase like
202641_at	0.0176469	0.000344	4.11	0.223407	0.801	ARL3	ADP ribosylation factor like GTPase 3
204670_x_at	0.0176472	0.000344	4.11	0.222523	1.52	LOC100996809///HLA-DRB4///HLA-DRB1	HLA class II histocompatibility antigen, DRB1-10 beta chain-like///major histocompatibility complex, class II, DR beta 4///major histocompatibility complex, class II, DR beta 1
224450_s_at	0.0177289	0.000346	-4.1	0.217396	-0.654	RIOK1	RIO kinase 1
227029_at	0.0177359	0.000347	-4.1	0.216169	-0.516	LOC101927178///FAM177A1	uncharacterized LOC101927178///family with sequence similarity 177 member A1
1568617_a_at	0.0177515	0.000347	-4.1	0.214493	-0.589	CAMSAP3	calmodulin regulated spectrin associated protein family member 3
202993_at	0.0178005	0.000349	-4.1	0.210335	-0.727	ILVBL	ilvB acetolactate synthase like
224858_at	0.0178005	0.000349	-4.1	0.210157	-0.269	ZDHHC5	zinc finger DHHC-type containing 5
226116_at	0.0178005	0.000349	-4.1	0.209365	-0.512	DFFA	DNA fragmentation factor subunit alpha
225157_at	0.0178386	0.000351	-4.1	0.205935	-0.658	MLXIP	MLX interacting protein
209882_at	0.0178386	0.000351	4.1	0.205668	0.718	RIT1	Ras like without CAAX 1
201101_s_at	0.0178743	0.000352	4.1	0.202964	0.59	BCLAF1	BCL2 associated transcription factor 1
202172_at	0.0178786	0.000352	-4.1	0.201111	-0.514	VEZF1	vascular endothelial zinc finger 1
231872_at	0.0178786	0.000353	-4.1	0.200853	-0.737	LRRCC1	leucine rich repeat and coiled-coil centrosomal protein 1
222641_s_at	0.0178786	0.000353	-4.1	0.200172	-0.367	FAM222B	family with sequence similarity 222 member B
235022_at	0.0178832	0.000353	-4.1	0.199082	-0.787	FAM210A	family with sequence similarity 210 member A
238965_at	0.017909	0.000354	-4.09	0.196882	-0.601	C21orf2	chromosome 21 open reading frame 2
208992_s_at	0.017909	0.000354	4.09	0.196041	0.573	STAT3	signal transducer and activator of transcription 3
220329_s_at	0.0179293	0.000355	-4.09	0.193299	-0.569	RMND1	required for meiotic nuclear division 1 homolog
1562093_at	0.0179293	0.000355	-4.09	0.193293	-0.258
222471_s_at	0.0179461	0.000356	-4.09	0.191577	-0.544	KCMF1	potassium channel modulatory factor 1
210473_s_at	0.0179639	0.000357	-4.09	0.189742	-0.995	ADGRA3	adhesion G protein-coupled receptor A3
217757_at	0.0179639	0.000357	4.09	0.188963	0.728	A2M	alpha-2-macroglobulin
219188_s_at	0.0179902	0.000358	-4.09	0.18676	-0.808	MACROD1	MACRO domain containing 1
54970_at	0.0180025	0.000359	-4.09	0.184145	-0.47	ZMIZ2	zinc finger MIZ-type containing 2
203554_x_at	0.0180025	0.000359	4.09	0.183989	0.743	PTTG1	pituitary tumor-transforming 1
215356_at	0.0180025	0.000359	4.09	0.183588	0.228	TDRD12	tudor domain containing 12
201091_s_at	0.0180465	0.00036	4.09	0.180492	0.46	CBX3	chromobox 3
225781_at	0.0181786	0.000364	-4.08	0.171236	-0.566	MAPK9	mitogen-activated protein kinase 9
207079_s_at	0.0181786	0.000364	4.08	0.170459	0.415	MED6	mediator complex subunit 6
AFFX-r2-Bs-thr-5_s_at	0.0181786	0.000365	-4.08	0.169811	-0.614
243168_at	0.0181786	0.000365	-4.08	0.169093	-0.297
200039_s_at	0.0181786	0.000365	4.08	0.168766	0.523	PSMB2	proteasome subunit beta 2
1554365_a_at	0.0181786	0.000365	4.08	0.1687	0.625	PPP2R5C	protein phosphatase 2 regulatory subunit B'gamma
228628_at	0.0182481	0.000367	4.08	0.164342	0.647	SRGAP2C	SLIT-ROBO Rho GTPase activating protein 2C
218151_x_at	0.0182687	0.000368	-4.08	0.161511	-0.414	SLC52A2	solute carrier family 52 member 2
227997_at	0.0182687	0.000368	-4.08	0.16079	-0.516	IL17RD	interleukin 17 receptor D
58994_at	0.0182687	0.000368	-4.08	0.160781	-0.512	CC2D1A	coiled-coil and C2 domain containing 1A
215223_s_at	0.0183164	0.00037	4.08	0.157539	1.43	LOC100129518///SOD2	uncharacterized LOC100129518///superoxide dismutase 2, mitochondrial
200782_at	0.0183188	0.00037	4.08	0.156311	1.1	ANXA5	annexin A5
226913_s_at	0.0183188	0.00037	-4.08	0.155745	-0.949	SOX8	SRY-box 8
202056_at	0.0183707	0.000372	-4.08	0.1523	-0.768	KPNA1	karyopherin subunit alpha 1
219595_at	0.0184241	0.000373	-4.07	0.14879	-0.728	ZNF26	zinc finger protein 26
230790_x_at	0.0185056	0.000375	-4.07	0.14388	-0.405	FOXN3	forkhead box N3
210629_x_at	0.0185277	0.000376	4.07	0.141946	0.763	LST1	leukocyte specific transcript 1
202893_at	0.0185962	0.000378	-4.07	0.137182	-0.562	UNC13B	unc-13 homolog B
228907_at	0.0185962	0.000378	-4.07	0.136574	-0.551
35685_at	0.0185962	0.000378	-4.07	0.136047	-0.283	RING1	ring finger protein 1
201272_at	0.0186139	0.000379	4.07	0.134075	1.16	AKR1B1	aldo-keto reductase family 1 member B
234983_at	0.0186139	0.000379	-4.07	0.133356	-0.5	C12orf49	chromosome 12 open reading frame 49
203848_at	0.0186139	0.00038	-4.07	0.132685	-0.355	AKAP8	A-kinase anchoring protein 8
224015_s_at	0.018626	0.000381	-4.07	0.130443	-0.774	MRPS25	mitochondrial ribosomal protein S25
209944_at	0.018626	0.000381	-4.07	0.130431	-0.304	PTGR2///ZNF410	prostaglandin reductase 2///zinc finger protein 410
1554867_a_at	0.0186431	0.000381	4.07	0.128758	0.513	PRR16	proline rich 16
222082_at	0.018723	0.000383	-4.06	0.123988	-0.284	ZBTB7A	zinc finger and BTB domain containing 7A
201738_at	0.018767	0.000385	-4.06	0.120284	-0.548	EIF1B	eukaryotic translation initiation factor 1B
216412_x_at	0.018767	0.000385	4.06	0.120174	2.14	CKAP2///IGLC1	cytoskeleton associated protein 2///immunoglobulin lambda constant 1
214826_at	0.018794	0.000386	-4.06	0.118026	-0.295	PDE12	phosphodiesterase 12
222753_s_at	0.0187986	0.000386	4.06	0.116543	1.23	SPCS3	signal peptidase complex subunit 3
224301_x_at	0.0187986	0.000386	4.06	0.116155	0.386	H2AFJ	H2A histone family member J
204717_s_at	0.0188054	0.000387	-4.06	0.114999	-0.777	SLC29A2	solute carrier family 29 member 2
222155_s_at	0.018837	0.000388	-4.06	0.11263	-0.621	SLC52A2	solute carrier family 52 member 2
226301_at	0.0188696	0.000389	-4.06	0.110066	-0.52	SLC18B1	solute carrier family 18 member B1
209336_at	0.0188696	0.000389	-4.06	0.109046	-0.518	PWP2	PWP2 periodic tryptophan protein homolog (yeast)
1555638_a_at	0.0188696	0.00039	4.06	0.108582	1.36	SAMSN1	SAM domain, SH3 domain and nuclear localization signals 1
204103_at	0.018878	0.00039	4.06	0.107253	1.53	CCL4	C-C motif chemokine ligand 4
219953_s_at	0.018878	0.000391	4.06	0.104464	0.352	AKIP1	A-kinase interacting protein 1
1557303_at	0.018878	0.000391	-4.06	0.104283	-0.396	NT5C	5', 3'-nucleotidase, cytosolic
212862_at	0.018878	0.000392	4.06	0.103812	0.481	CDS2	CDP-diacylglycerol synthase 2
212592_at	0.018878	0.000392	4.06	0.103721	0.882	JCHAIN	joining chain of multimeric IgA and IgM
202097_at	0.018878	0.000392	-4.06	0.103277	-0.479	NUP153	nucleoporin 153
220673_s_at	0.0188785	0.000392	-4.06	0.102443	-0.264	PPP4R4	protein phosphatase 4 regulatory subunit 4
1553722_s_at	0.0189	0.000393	-4.05	0.09977	-0.34	RNF152	ring finger protein 152
229235_at	0.0189	0.000394	-4.05	0.09908	-0.532	NFATC2IP	nuclear factor of activated T-cells 2 interacting protein
202981_x_at	0.0189	0.000394	-4.05	0.097574	-0.438	SIAH1	siah E3 ubiquitin protein ligase 1
226776_at	0.0189	0.000395	-4.05	0.095585	-0.417	ENY2	ENY2, transcription and export complex 2 subunit
221290_s_at	0.0189	0.000395	-4.05	0.094922	-0.549	MUM1	melanoma associated antigen (mutated) 1
204502_at	0.0189	0.000395	4.05	0.094826	0.833	SAMHD1	SAM and HD domain containing deoxynucleoside triphosphate triphosphohydrolase 1
203291_at	0.0189	0.000396	-4.05	0.094786	-0.442	CNOT4	CCR4-NOT transcription complex subunit 4
223443_s_at	0.0189	0.000396	4.05	0.093644	0.526	AMZ2P1	archaelysin family metallopeptidase 2 pseudogene 1
240303_at	0.0189	0.000396	4.05	0.093195	1.4	TMC5	transmembrane channel like 5
1555797_a_at	0.0189	0.000397	4.05	0.092422	0.562	ARPC5	actin related protein 2/3 complex subunit 5
33760_at	0.0189	0.000397	-4.05	0.092294	-0.502	PEX14	peroxisomal biogenesis factor 14
228039_at	0.0189	0.000397	-4.05	0.091695	-0.491	DDX46	DEAD-box helicase 46
228650_at	0.0189124	0.000397	-4.05	0.090289	-0.538
213139_at	0.0189299	0.000398	4.05	0.088633	1.01	SNAI2	snail family transcriptional repressor 2
230298_at	0.0189919	0.0004	-4.05	0.084196	-0.505	MBLAC2	metallo-beta-lactamase domain containing 2
213271_s_at	0.0189919	0.0004	-4.05	0.084011	-0.362	DOPEY1	dopey family member 1
1556183_at	0.0190493	0.000402	4.05	0.080312	1.92	ANKRD36BP2	ankyrin repeat domain 36B pseudogene 2
44669_at	0.0190493	0.000402	-4.05	0.079257	-0.442	SDHAF1	succinate dehydrogenase complex assembly factor 1
206015_s_at	0.0190493	0.000402	-4.05	0.078828	-0.404	FOXJ3	forkhead box J3
239252_at	0.0190685	0.000403	-4.05	0.077101	-0.888	COX7B	cytochrome c oxidase subunit 7B
226336_at	0.0190719	0.000404	-4.04	0.075535	-0.515	LOC101060363///PPIA	peptidyl-prolyl cis-trans isomerase A pseudogene///peptidylprolyl isomerase A
209541_at	0.0190719	0.000404	4.04	0.075339	1.12	IGF1	insulin like growth factor 1
209972_s_at	0.0190792	0.000404	-4.04	0.074189	-0.447	AIMP2	aminoacyl tRNA synthetase complex interacting multifunctional protein 2
1565577_s_at	0.0190796	0.000405	-4.04	0.072449	-0.477
213566_at	0.0190796	0.000405	4.04	0.071975	1.19	RNASE6	ribonuclease A family member k6
206272_at	0.0190796	0.000405	-4.04	0.071786	-0.941	SPHAR///RAB4A	S-phase response (cyclin related)///RAB4A, member RAS oncogene family
219194_at	0.0191433	0.000407	-4.04	0.067919	-0.872	SEMA4G	semaphorin 4G
201467_s_at	0.0192457	0.00041	4.04	0.062201	1.08	NQO1	NAD(P)H quinone dehydrogenase 1
213264_at	0.0192968	0.000411	-4.04	0.058965	-0.747	PCBP2	poly(rC) binding protein 2
219513_s_at	0.0193039	0.000412	-4.04	0.057835	-0.498	SH2D3A	SH2 domain containing 3A
211649_x_at	0.0193529	0.000414	4.04	0.053247	2.13	IGHM///IGHG1///IGHA1	immunoglobulin heavy constant mu///immunoglobulin heavy constant gamma 1 (G1m marker)///immunoglobulin heavy constant alpha 1
217606_at	0.0193529	0.000414	-4.04	0.053152	-0.279
216708_x_at	0.0193529	0.000414	4.04	0.053124	0.64	IGLJ3	immunoglobulin lambda joining 3
202803_s_at	0.0193778	0.000415	4.03	0.051008	1.85	ITGB2	integrin subunit beta 2
217618_x_at	0.0193778	0.000415	-4.03	0.04979	-0.634	HUS1	HUS1 checkpoint clamp component
204434_at	0.0193778	0.000415	-4.03	0.049572	-0.788	SPATA2	spermatogenesis associated 2
74694_s_at	0.0193848	0.000416	-4.03	0.048453	-0.589	RABEP2	rabaptin, RAB GTPase binding effector protein 2
224513_s_at	0.0194244	0.000417	-4.03	0.045783	-0.445	UBQLN4	ubiquilin 4
230972_at	0.0194622	0.000418	-4.03	0.043095	-0.773	ANKRD9	ankyrin repeat domain 9
1559067_a_at	0.0194622	0.000419	-4.03	0.042424	-0.751	LOC158402	uncharacterized LOC158402
218548_x_at	0.0194638	0.000419	-4.03	0.040568	-0.378	TEX264	testis expressed 264
208373_s_at	0.0194638	0.00042	4.03	0.039966	0.493	P2RY6	pyrimidinergic receptor P2Y6
227867_at	0.0194638	0.00042	-4.03	0.039564	-1.42	TRABD2A	TraB domain containing 2A
225679_at	0.0194638	0.00042	-4.03	0.038706	-0.532	NAA30	N(alpha)-acetyltransferase 30, NatC catalytic subunit
211135_x_at	0.0194638	0.00042	4.03	0.038433	0.465	LILRB3	leukocyte immunoglobulin like receptor B3
232978_at	0.0194962	0.000421	4.03	0.036119	0.635
201485_s_at	0.0195266	0.000422	4.03	0.033902	0.422	RCN2	reticulocalbin 2
209445_x_at	0.0195339	0.000423	4.03	0.032776	0.625	COA1	cytochrome c oxidase assembly factor 1 homolog
218747_s_at	0.0195645	0.000424	4.03	0.030553	0.714	TAPBPL	TAP binding protein like
233873_x_at	0.0195707	0.000425	-4.03	0.029484	-0.517	MTPAP	mitochondrial poly(A) polymerase
236284_at	0.0196399	0.000426	4.02	0.025448	0.351	SPIDR	scaffolding protein involved in DNA repair
1570335_at	0.0197328	0.000429	4.02	0.02032	0.507
218947_s_at	0.019769	0.00043	-4.02	0.017852	-0.603	MTPAP	mitochondrial poly(A) polymerase
229757_at	0.0197867	0.000431	-4.02	0.016254	-0.808
209933_s_at	0.0198745	0.000433	4.02	0.010659	1.08	CD300A	CD300a molecule
221253_s_at	0.0198745	0.000433	4.02	0.01062	1.1	BLOC1S5-TXNDC5///TXNDC5	BLOC1S5-TXNDC5 readthrough (NMD candidate)///thioredoxin domain containing 5
207334_s_at	0.0199084	0.000434	4.02	0.008273	0.491	TGFBR2	transforming growth factor beta receptor 2
218932_at	0.0199103	0.000435	-4.02	0.007415	-0.603	ZNHIT6	zinc finger HIT-type containing 6
225916_at	0.0200063	0.000437	-4.01	0.002204	-0.433	LOC100506639///ZNF131	uncharacterized LOC100506639///zinc finger protein 131
226356_at	0.0200414	0.000438	-4.01	-0.000185	-0.575	MIGA2	mitoguardin 2
209358_at	0.0200579	0.000439	-4.01	-0.001719	-0.408	TAF11	TATA-box binding protein associated factor 11
225915_at	0.0200579	0.000439	-4.01	-0.002483	-0.638	CAB39L	calcium binding protein 39 like
225038_s_at	0.0200749	0.00044	-4.01	-0.004036	-0.498	SURF6	surfeit 6
203674_at	0.0201071	0.000442	4.01	-0.007086	0.296	HELZ	helicase with zinc finger
235937_at	0.0201071	0.000442	-4.01	-0.00732	-0.909	OCLN	occludin
214022_s_at	0.0201071	0.000442	4.01	-0.007817	1.23	IFITM1	interferon induced transmembrane protein 1
203752_s_at	0.0201126	0.000444	-4.01	-0.011091	-0.388	JUND	JunD proto-oncogene, AP-1 transcription factor subunit
209518_at	0.0201126	0.000444	-4.01	-0.011296	-0.331	SMARCD1	SWI/SNF related, matrix associated, actin dependent regulator of chromatin, subfamily d, member 1
217841_s_at	0.0201126	0.000444	-4.01	-0.01144	-0.482	PPME1	protein phosphatase methylesterase 1
205217_at	0.0201126	0.000444	-4.01	-0.011569	-0.805	TIMM8A	translocase of inner mitochondrial membrane 8 homolog A (yeast)
210256_s_at	0.0201126	0.000444	4.01	-0.011895	0.422	PIP5K1A	phosphatidylinositol-4-phosphate 5-kinase type 1 alpha
202775_s_at	0.0201231	0.000445	-4.01	-0.013142	-0.429	SFSWAP	splicing factor SWAP homolog
223585_x_at	0.0201513	0.000446	4.01	-0.015866	0.397	KBTBD2	kelch repeat and BTB domain containing 2
219525_at	0.0201513	0.000446	4.01	-0.015961	0.387	SLC47A1	solute carrier family 47 member 1
219955_at	0.0201878	0.000447	4.01	-0.018573	2.02	L1TD1	LINE1 type transposase domain containing 1
238002_at	0.0201878	0.000448	-4.01	-0.019795	-0.568	GOLIM4	golgi integral membrane protein 4
225923_at	0.0201878	0.000448	-4.01	-0.01991	-0.954	VAPB	VAMP associated protein B and C
227405_s_at	0.0201897	0.000448	-4	-0.020761	-0.701	MIR4683///FZD8	microRNA 4683///frizzled class receptor 8
239404_at	0.0201901	0.000449	4	-0.021535	0.773
212123_at	0.0202073	0.000449	-4	-0.023184	-0.387	TCTN3	tectonic family member 3
217168_s_at	0.0202073	0.00045	4	-0.02384	0.761	HERPUD1	homocysteine inducible ER protein with ubiquitin like domain 1
203797_at	0.0202083	0.000451	4	-0.025922	0.952	VSNL1	visinin like 1
218068_s_at	0.0202083	0.000451	-4	-0.026575	-0.449	ZNF672	zinc finger protein 672
202171_at	0.0202083	0.000451	-4	-0.02683	-0.288	VEZF1	vascular endothelial zinc finger 1
218282_at	0.0202083	0.000452	4	-0.027511	0.464	EDEM2	ER degradation enhancing alpha-mannosidase like protein 2
235907_at	0.0202083	0.000452	-4	-0.02807	-0.744	TMEM33	transmembrane protein 33
226188_at	0.0202083	0.000452	-4	-0.029235	-0.682	LGALSL	galectin like
214447_at	0.0202083	0.000452	4	-0.029278	0.547	ETS1	ETS proto-oncogene 1, transcription factor
227187_at	0.0202083	0.000453	-4	-0.029927	-0.602	CBLL1	Cbl proto-oncogene like 1
204416_x_at	0.0202567	0.000454	4	-0.032884	0.938	APOC1	apolipoprotein C1
AFFX-HUMISGF3A/M97935_MA_at	0.0202835	0.000455	4	-0.034908	1.34	STAT1	signal transducer and activator of transcription 1
225389_at	0.0202835	0.000456	-4	-0.036309	-0.236	BTBD6	BTB domain containing 6
212747_at	0.0202835	0.000456	-4	-0.036818	-0.372	ANKS1A	ankyrin repeat and sterile alpha motif domain containing 1A
201527_at	0.0202835	0.000457	4	-0.039025	0.559	LOC101927180///ATP6V1F	V-type proton ATPase subunit F pseudogene///ATPase H+ transporting V1 subunit F
222663_at	0.0202835	0.000457	-4	-0.03914	-0.556	RIOK2	RIO kinase 2
233090_at	0.0202835	0.000458	4	-0.040033	0.639
240600_at	0.0202835	0.000458	4	-0.040422	0.871
204448_s_at	0.0202835	0.000458	4	-0.040512	0.361	PDCL	phosducin like
201219_at	0.0202835	0.000458	-4	-0.040926	-0.429	CTBP2	C-terminal binding protein 2
221579_s_at	0.0202835	0.000459	4	-0.041594	0.508	RPS10-NUDT3///NUDT3	RPS10-NUDT3 readthrough///nudix hydrolase 3
205147_x_at	0.0202883	0.000459	4	-0.042558	1.25	NCF4	neutrophil cytosolic factor 4
213143_at	0.0203225	0.00046	-3.99	-0.044856	-0.688	C2orf72	chromosome 2 open reading frame 72
218329_at	0.020431	0.000463	-3.99	-0.050513	-0.407	PRDM4	PR/SET domain 4
214751_at	0.0204328	0.000463	-3.99	-0.051335	-0.772	ZNF468	zinc finger protein 468
211998_at	0.0204358	0.000464	-3.99	-0.052422	-0.448	MIR4738///H3F3B///H3F3A	microRNA 4738///H3 histone, family 3B///H3 histone, family 3A
205815_at	0.0204358	0.000464	3.99	-0.052959	5.05	REG3A	regenerating family member 3 alpha
208632_at	0.0204786	0.000466	-3.99	-0.055632	-0.507	RNF10	ring finger protein 10
212904_at	0.020485	0.000466	-3.99	-0.056838	-0.421	LRRC47	leucine rich repeat containing 47
201137_s_at	0.020485	0.000467	3.99	-0.057948	1.59	HLA-DPB1	major histocompatibility complex, class II, DP beta 1
209398_at	0.020485	0.000467	3.99	-0.058331	1.02	HIST1H1C	histone cluster 1, H1c
229313_at	0.020485	0.000467	-3.99	-0.059434	-0.896	ANO5	anoctamin 5
210716_s_at	0.020485	0.000468	3.99	-0.05962	0.492	CLIP1	CAP-Gly domain containing linker protein 1
228045_at	0.0205091	0.000469	-3.99	-0.061443	-1.14	SUGT1	SGT1 homolog, MIS12 kinetochore complex assembly cochaperone
216365_x_at	0.0205158	0.000469	3.99	-0.062479	2.02	IGLJ3///CKAP2	immunoglobulin lambda joining 3///cytoskeleton associated protein 2
202862_at	0.0205407	0.00047	-3.99	-0.064338	-0.578	FAH	fumarylacetoacetate hydrolase
228458_at	0.0205809	0.000472	3.99	-0.067384	0.334	C6orf226	chromosome 6 open reading frame 226
222567_s_at	0.0205809	0.000472	3.99	-0.067989	0.376	MEX3C	mex-3 RNA binding family member C
213548_s_at	0.0205809	0.000472	3.99	-0.068738	0.86	CDV3	CDV3 homolog
231714_s_at	0.0205809	0.000472	-3.98	-0.069081	-0.387	AP4B1	adaptor related protein complex 4 beta 1 subunit
234331_s_at	0.0206016	0.000473	-3.98	-0.070855	-0.844	FAM84A	family with sequence similarity 84 member A
228002_at	0.0206016	0.000474	-3.98	-0.072562	-0.702	IDI2///GTPBP4	isopentenyl-diphosphate delta isomerase 2///GTP binding protein 4
200623_s_at	0.0206016	0.000474	3.98	-0.073059	0.542	CALM3///CALM2///CALM1	calmodulin 3///calmodulin 2///calmodulin 1
213701_at	0.0206016	0.000475	-3.98	-0.073186	-0.686	C12orf29	chromosome 12 open reading frame 29
204279_at	0.0206016	0.000475	3.98	-0.073674	1.89	PSMB9	proteasome subunit beta 9
213900_at	0.0206021	0.000475	-3.98	-0.074791	-0.547	FAM189A2	family with sequence similarity 189 member A2
201201_at	0.0206021	0.000476	3.98	-0.075161	0.632	CSTB	cystatin B
223185_s_at	0.0206223	0.000477	-3.98	-0.077462	-0.674	BHLHE41	basic helix-loop-helix family member e41
212872_s_at	0.0206223	0.000477	-3.98	-0.077521	-0.377	MED20	mediator complex subunit 20
AFFX-ThrX-5_at	0.0206282	0.000477	-3.98	-0.078517	-0.476
222517_at	0.0206343	0.000478	-3.98	-0.079518	-0.524	AP3M1	adaptor related protein complex 3 mu 1 subunit
212483_at	0.0206711	0.000479	-3.98	-0.082525	-0.428	NIPBL	NIPBL, cohesin loading factor
1555993_at	0.0206711	0.000479	-3.98	-0.082614	-0.493	CACNA1D	calcium voltage-gated channel subunit alpha1 D
203800_s_at	0.0207325	0.000482	3.98	-0.087567	0.343	MRPS14	mitochondrial ribosomal protein S14
219286_s_at	0.0207325	0.000482	-3.98	-0.088085	-0.502	RBM15	RNA binding motif protein 15
222578_s_at	0.0207325	0.000482	3.98	-0.088279	0.513	UBA5	ubiquitin like modifier activating enzyme 5
218208_at	0.0207325	0.000483	-3.98	-0.088967	-0.56	PQLC1	PQ loop repeat containing 1
201040_at	0.0207325	0.000483	3.98	-0.089551	0.785	GNAI2	G protein subunit alpha i2
209064_x_at	0.0207325	0.000483	-3.98	-0.089703	-0.747	PAIP1	poly(A) binding protein interacting protein 1
216199_s_at	0.0207588	0.000484	-3.98	-0.092082	-0.418	MAP3K4	mitogen-activated protein kinase kinase kinase 4
215509_s_at	0.0207588	0.000484	3.98	-0.092316	0.876	BUB1	BUB1 mitotic checkpoint serine/threonine kinase
204204_at	0.0208499	0.000487	3.97	-0.097397	0.653	SLC31A2	solute carrier family 31 member 2
216064_s_at	0.0208499	0.000488	3.97	-0.098234	0.621	AGA	aspartylglucosaminidase
224591_at	0.0208499	0.000488	-3.97	-0.098517	-0.389	HP1BP3	heterochromatin protein 1 binding protein 3
206303_s_at	0.0208514	0.000488	3.97	-0.099306	0.66	NUDT4P1///NUDT4P2///NUDT4	nudix hydrolase 4 pseudogene 1///nudix hydrolase 4 pseudogene 2///nudix hydrolase 4
1567697_at	0.0209359	0.000491	-3.97	-0.104547	-0.212
1553979_at	0.0209359	0.000491	-3.97	-0.105139	-0.465	ZNF121	zinc finger protein 121
230252_at	0.0209359	0.000492	-3.97	-0.105645	-0.634	LPAR5	lysophosphatidic acid receptor 5
209494_s_at	0.0209359	0.000492	-3.97	-0.106282	-0.388	PATZ1	POZ/BTB and AT hook containing zinc finger 1
212766_s_at	0.0209359	0.000492	-3.97	-0.106628	-0.628	ISG20L2	interferon stimulated exonuclease gene 20 like 2
51192_at	0.0209413	0.000493	-3.97	-0.108099	-0.358	SSH3	slingshot protein phosphatase 3
203338_at	0.0209413	0.000493	-3.97	-0.108298	-0.452	PPP2R5E	protein phosphatase 2 regulatory subunit B'epsilon
200831_s_at	0.0210038	0.000496	3.97	-0.114092	0.919	SCD	stearoyl-CoA desaturase
241765_at	0.0210038	0.000496	-3.97	-0.114299	-0.92	CPM	carboxypeptidase M
218767_at	0.0210038	0.000496	-3.97	-0.114342	-0.347	REXO4	REX4 homolog, 3'-5' exonuclease
1555229_a_at	0.0210038	0.000496	3.97	-0.114419	1.64	C1S	complement component 1, s subcomponent
225467_s_at	0.0210038	0.000496	-3.97	-0.114922	-0.595	RDH13	retinol dehydrogenase 13
242905_at	0.0210038	0.000497	-3.97	-0.115331	-0.944	PNO1	partner of NOB1 homolog
225962_at	0.0210232	0.000498	-3.97	-0.116896	-0.506	ZNRF1	zinc and ring finger 1, E3 ubiquitin protein ligase
219448_at	0.0210781	0.000499	-3.96	-0.120015	-0.4	TMEM70	transmembrane protein 70
232307_at	0.021103	0.000501	3.96	-0.122422	0.72
204647_at	0.021103	0.000501	3.96	-0.122524	0.37	HOMER3	homer scaffolding protein 3
201720_s_at	0.0211706	0.000503	3.96	-0.12661	1.56	LAPTM5	lysosomal protein transmembrane 5
202677_at	0.0211706	0.000503	-3.96	-0.12689	-0.301	RASA1	RAS p21 protein activator 1
201788_at	0.0211931	0.000504	-3.96	-0.12858	-0.379	DDX42	DEAD-box helicase 42
237625_s_at	0.0211999	0.000505	3.96	-0.130249	2.3
1556834_at	0.0211999	0.000505	-3.96	-0.13113	-0.983	DSG2-AS1	DSG2 antisense RNA 1
205527_s_at	0.0211999	0.000505	-3.96	-0.131149	-0.551	GEMIN4	gem nuclear organelle associated protein 4
219420_s_at	0.0211999	0.000506	-3.96	-0.131707	-0.79	COA7	cytochrome c oxidase assembly factor 7 (putative)
219546_at	0.0213174	0.000509	-3.96	-0.137509	-0.561	BMP2K	BMP2 inducible kinase
227436_at	0.0213403	0.00051	-3.96	-0.139205	-0.523	OTUD7B	OTU deubiquitinase 7B
210430_x_at	0.021347	0.00051	3.96	-0.140199	0.292	RHD	Rh blood group D antigen
AFFX-r2-Ec-bioB-5_at	0.0214199	0.000513	-3.95	-0.144544	-0.425
224829_at	0.0214199	0.000513	3.95	-0.144749	1.26	CPEB4	cytoplasmic polyadenylation element binding protein 4
210655_s_at	0.0214335	0.000514	3.95	-0.14604	0.615	FOXO3B///FOXO3	forkhead box O3B pseudogene///forkhead box O3
225588_s_at	0.0214376	0.000514	-3.95	-0.147118	-0.466	TMEM129	transmembrane protein 129
207085_x_at	0.0214376	0.000515	3.95	-0.147777	0.63	CSF2RA	colony stimulating factor 2 receptor alpha subunit
201239_s_at	0.0214376	0.000515	3.95	-0.148325	0.523	SPCS2	signal peptidase complex subunit 2
242943_at	0.0214591	0.000516	3.95	-0.149951	1.04	ST8SIA4	ST8 alpha-N-acetyl-neuraminide alpha-2,8-sialyltransferase 4
200737_at	0.021473	0.000516	3.95	-0.151249	0.452	PGK1	phosphoglycerate kinase 1
224569_s_at	0.021495	0.000517	-3.95	-0.152892	-0.661	IRF2BP2	interferon regulatory factor 2 binding protein 2
202746_at	0.0215152	0.000518	3.95	-0.154459	0.839	ITM2A	integral membrane protein 2A
222297_x_at	0.0215219	0.00052	-3.95	-0.156931	-0.307	RPL18	ribosomal protein L18
226431_at	0.0215219	0.00052	-3.95	-0.157028	-0.901	FAM117B	family with sequence similarity 117 member B
215936_s_at	0.0215219	0.00052	3.95	-0.157313	0.636	KIAA1033	KIAA1033
223126_s_at	0.0215219	0.00052	-3.95	-0.1582	-0.656	C1orf21	chromosome 1 open reading frame 21
217844_at	0.0215219	0.00052	-3.95	-0.158235	-0.31	CTDSP1	CTD small phosphatase 1
227836_at	0.0215909	0.000522	-3.95	-0.161885	-0.384	UTP23	UTP23, small subunit processome component
214662_at	0.0216113	0.000523	-3.95	-0.16345	-0.833	WDR43	WD repeat domain 43
208997_s_at	0.0216168	0.000524	3.95	-0.164381	1.01	UCP2	uncoupling protein 2
208498_s_at	0.0216645	0.000525	-3.94	-0.167109	-1.05	ACTG1P4///AMY2B///AMY2A///AMY1C///AMY1B///AMY1A	actin gamma 1 pseudogene 4///amylase, alpha 2B (pancreatic)///amylase, alpha 2A (pancreatic)///amylase, alpha 1C (salivary)///amylase, alpha 1B (salivary)///amylase, alpha 1A (salivary)
218933_at	0.0217333	0.000527	-3.94	-0.170723	-0.389	SPATA5L1	spermatogenesis associated 5 like 1
203363_s_at	0.0217523	0.000529	3.94	-0.172754	0.425	ATG13	autophagy related 13
236673_at	0.0217523	0.000529	3.94	-0.172918	0.42	TIFAB	TIFA inhibitor
212438_at	0.0218024	0.00053	3.94	-0.175732	0.45	SNRNP27	small nuclear ribonucleoprotein U4/U6.U5 subunit 27
221527_s_at	0.0218619	0.000532	-3.94	-0.178935	-0.679	PARD3	par-3 family cell polarity regulator
218698_at	0.0218674	0.000533	3.94	-0.180731	1.07	APIP	APAF1 interacting protein
207797_s_at	0.0218674	0.000534	3.94	-0.182175	0.242	LRP2BP	LRP2 binding protein
215076_s_at	0.0218674	0.000534	3.94	-0.182446	1.22	COL3A1	collagen type III alpha 1 chain
243594_x_at	0.0218674	0.000535	-3.94	-0.183188	-0.716	SPIRE2	spire type actin nucleation factor 2
200814_at	0.0218674	0.000535	3.94	-0.183216	0.528	PSME1	proteasome activator subunit 1
243524_at	0.0218674	0.000536	3.94	-0.184869	0.831
208804_s_at	0.0218674	0.000536	-3.94	-0.185039	-0.551	SRSF6	serine and arginine rich splicing factor 6
1568936_a_at	0.0218674	0.000536	-3.94	-0.185049	-0.214
227132_at	0.0218674	0.000536	-3.94	-0.185374	-0.741	ZNF706	zinc finger protein 706
226892_at	0.0218822	0.000537	-3.94	-0.18669	-0.435	C10orf12	chromosome 10 open reading frame 12
224924_at	0.0218822	0.000537	3.94	-0.187374	0.364	TTC7A	tetratricopeptide repeat domain 7A
218552_at	0.0218824	0.000538	-3.94	-0.189281	-0.424	ECHDC2	enoyl-CoA hydratase domain containing 2
210759_s_at	0.0218824	0.000538	3.94	-0.189517	0.374	PSMA1	proteasome subunit alpha 1
216457_s_at	0.0218824	0.000539	-3.93	-0.190149	-0.38	SF3A1	splicing factor 3a subunit 1
202223_at	0.0218824	0.000539	3.93	-0.190578	0.532	STT3A	STT3A, catalytic subunit of the oligosaccharyltransferase complex
222912_at	0.0218824	0.00054	-3.93	-0.192623	-0.863	ARRB1	arrestin beta 1
224983_at	0.0218824	0.00054	-3.93	-0.19276	-0.35	SCARB2	scavenger receptor class B member 2
212114_at	0.0218824	0.00054	-3.93	-0.193173	-0.409	ATXN7L3B	ataxin 7 like 3B
212267_at	0.0218824	0.00054	-3.93	-0.193174	-0.324	WAPL	WAPL cohesin release factor
221724_s_at	0.0218824	0.000541	3.93	-0.19354	0.82	CLEC4A	C-type lectin domain family 4 member A
236476_at	0.0220394	0.000545	-3.93	-0.201574	-0.464
212613_at	0.0220394	0.000546	3.93	-0.202438	0.996	BTN3A2	butyrophilin subfamily 3 member A2
1563783_a_at	0.0220394	0.000546	3.93	-0.202673	0.285	ZNF333	zinc finger protein 333
211382_s_at	0.0220394	0.000547	-3.93	-0.203872	-0.724	TACC2	transforming acidic coiled-coil containing protein 2
237158_s_at	0.0220394	0.000547	3.93	-0.203929	0.554	MPHOSPH9	M-phase phosphoprotein 9
218184_at	0.0220394	0.000547	-3.93	-0.204212	-0.6	TULP4	tubby like protein 4
226993_at	0.0220546	0.000548	-3.93	-0.205613	-0.434	TRIP12	thyroid hormone receptor interactor 12
200995_at	0.0220546	0.000548	-3.93	-0.206203	-0.559	IPO7	importin 7
208820_at	0.022114	0.00055	-3.93	-0.20936	-0.284	PTK2	protein tyrosine kinase 2
215230_x_at	0.0221176	0.000551	-3.93	-0.210186	-0.51	EIF3CL///EIF3C	eukaryotic translation initiation factor 3 subunit C-like///eukaryotic translation initiation factor 3 subunit C
212205_at	0.0221864	0.000553	-3.92	-0.214773	-0.552	H2AFV	H2A histone family member V
219675_s_at	0.0221864	0.000554	-3.92	-0.215695	-0.487	UXS1	UDP-glucuronate decarboxylase 1
210706_s_at	0.0221864	0.000554	3.92	-0.21603	0.479	RNF24	ring finger protein 24
212599_at	0.0221864	0.000555	-3.92	-0.217542	-0.934	AUTS2	autism susceptibility candidate 2
203827_at	0.0221864	0.000555	3.92	-0.217886	0.408	WIPI1	WD repeat domain, phosphoinositide interacting 1
216684_s_at	0.0221864	0.000555	3.92	-0.218031	0.368	SS18	SS18, nBAF chromatin remodeling complex subunit
218149_s_at	0.0221864	0.000555	-3.92	-0.2184	-0.618	ZNF395	zinc finger protein 395
221270_s_at	0.0221864	0.000556	-3.92	-0.218446	-0.645	QTRT1	queuine tRNA-ribosyltransferase catalytic subunit 1
239245_at	0.0222413	0.000557	3.92	-0.221396	0.536
206028_s_at	0.0222427	0.000558	3.92	-0.222125	0.962	MERTK	MER proto-oncogene, tyrosine kinase
222312_s_at	0.022259	0.000559	-3.92	-0.223498	-0.655
200647_x_at	0.022259	0.000559	-3.92	-0.224146	-0.504	EIF3CL///EIF3C	eukaryotic translation initiation factor 3 subunit C-like///eukaryotic translation initiation factor 3 subunit C
218065_s_at	0.0222923	0.00056	-3.92	-0.226192	-0.527	TMEM9B	TMEM9 domain family member B
202487_s_at	0.0223436	0.000562	3.92	-0.228983	0.31	H2AFV	H2A histone family member V
231069_at	0.0223457	0.000562	-3.92	-0.229737	-0.931
236380_at	0.0223674	0.000563	-3.92	-0.231302	-0.554	RPP14	ribonuclease P/MRP subunit p14
238571_at	0.0223872	0.000565	-3.92	-0.233249	-0.784	HOXA13	homeobox A13
201535_at	0.0223872	0.000565	-3.92	-0.233752	-0.609	UBL3	ubiquitin like 3
1552390_a_at	0.0223872	0.000565	-3.92	-0.234123	-0.57	ERICH5	glutamate rich 5
209456_s_at	0.0223945	0.000566	3.92	-0.23509	0.482	FBXW11	F-box and WD repeat domain containing 11
207224_s_at	0.022399	0.000566	3.92	-0.235942	0.496	SIGLEC7	sialic acid binding Ig like lectin 7
229043_at	0.0224382	0.000568	-3.91	-0.238217	-0.417	PAPD5	poly(A) RNA polymerase D5, non-canonical
201513_at	0.0224391	0.000568	-3.91	-0.238922	-0.622	TSN	translin
227655_at	0.0224463	0.000569	-3.91	-0.23988	-0.959	SNHG18	small nucleolar RNA host gene 18
221476_s_at	0.0224762	0.00057	-3.91	-0.241771	-0.394	RPL15	ribosomal protein L15
1555357_at	0.0225351	0.000572	-3.91	-0.245335	-0.191	DDX53	DEAD-box helicase 53
232138_at	0.0225351	0.000572	3.91	-0.245512	0.899	MBNL2	muscleblind like splicing regulator 2
230079_at	0.022565	0.000573	-3.91	-0.247568	-0.367	ST7L	suppression of tumorigenicity 7 like
46167_at	0.022565	0.000574	-3.91	-0.248146	-0.536	MROH7-TTC4///TTC4	MROH7-TTC4 readthrough (NMD candidate)///tetratricopeptide repeat domain 4
212640_at	0.022565	0.000574	-3.91	-0.248721	-0.565	HACD2	3-hydroxyacyl-CoA dehydratase 2
201012_at	0.0226357	0.000577	3.91	-0.253547	2.19	ANXA1	annexin A1
217138_x_at	0.0226357	0.000578	3.91	-0.254212	0.912	IGLC1	immunoglobulin lambda constant 1
226447_at	0.0226357	0.000578	-3.91	-0.255301	-0.42	ASH1L	ASH1 like histone lysine methyltransferase
225153_at	0.0226357	0.000579	-3.91	-0.256085	-0.741	GFM1	G elongation factor mitochondrial 1
212303_x_at	0.0226357	0.000579	-3.91	-0.25617	-0.351	KHSRP	KH-type splicing regulatory protein
206765_at	0.0226357	0.000579	-3.91	-0.256716	-1.17	KCNJ2	potassium voltage-gated channel subfamily J member 2
203230_at	0.0226357	0.000579	-3.91	-0.256939	-0.601	DVL1	dishevelled segment polarity protein 1
1559883_s_at	0.0226357	0.00058	3.91	-0.258265	0.786	SAMHD1	SAM and HD domain containing deoxynucleoside triphosphate triphosphohydrolase 1
201426_s_at	0.0226357	0.000581	3.91	-0.259393	1.02	VIM	vimentin
1554577_a_at	0.0226357	0.000581	3.91	-0.259607	0.423	PSMD10	proteasome 26S subunit, non-ATPase 10
225865_x_at	0.0226357	0.000581	-3.91	-0.260015	-0.301	NELFCD	negative elongation factor complex member C/D
201415_at	0.0226357	0.000581	-3.91	-0.260253	-0.405	GSS	glutathione synthetase
232809_s_at	0.0226357	0.000581	3.91	-0.260415	0.424	FLT1	fms related tyrosine kinase 1
229016_s_at	0.0226357	0.000582	3.91	-0.26083	0.387	TRERF1	transcriptional regulating factor 1
212673_at	0.0226899	0.000584	-3.9	-0.263831	-0.428	METAP1	methionyl aminopeptidase 1
204833_at	0.0226899	0.000585	3.9	-0.265437	0.452	ATG12	autophagy related 12
219301_s_at	0.0226899	0.000585	-3.9	-0.265458	-0.504	CNTNAP2	contactin associated protein-like 2
239330_at	0.0226899	0.000585	-3.9	-0.265836	-0.216	DCAF12L2	DDB1 and CUL4 associated factor 12 like 2
201105_at	0.0226899	0.000585	3.9	-0.266418	1.2	LGALS1	galectin 1
202075_s_at	0.0226899	0.000586	3.9	-0.267153	1.16	PLTP	phospholipid transfer protein
225666_at	0.0226899	0.000586	-3.9	-0.267609	-0.705	TMTC4	transmembrane and tetratricopeptide repeat containing 4
228601_at	0.0226997	0.000587	-3.9	-0.268659	-1.24	HAGLR	HOXD antisense growth-associated long non-coding RNA
202748_at	0.0227218	0.000588	3.9	-0.270207	1.13	GBP2	guanylate binding protein 2
225977_at	0.0227244	0.000589	3.9	-0.271571	0.7	PCDH18	protocadherin 18
208097_s_at	0.0227244	0.000589	3.9	-0.271614	0.55	TMX1	thioredoxin related transmembrane protein 1
227658_s_at	0.0228615	0.000592	3.9	-0.277806	0.393	PLEKHA3	pleckstrin homology domain containing A3
229121_at	0.0228639	0.000593	3.9	-0.278549	0.731	CMKLR1	chemerin chemokine-like receptor 1
218298_s_at	0.0229401	0.000596	-3.9	-0.283024	-0.347	C14orf159	chromosome 14 open reading frame 159
219031_s_at	0.0229401	0.000596	-3.9	-0.283467	-0.726	NIP7	NIP7, nucleolar pre-rRNA processing protein
240339_at	0.0229401	0.000597	-3.9	-0.284587	-0.553
239629_at	0.0229401	0.000597	3.9	-0.284682	0.98	CFLAR	CASP8 and FADD like apoptosis regulator
203650_at	0.0229401	0.000597	3.9	-0.284858	0.771	PROCR	protein C receptor
201470_at	0.0230959	0.000602	3.89	-0.292444	0.447	GSTO1	glutathione S-transferase omega 1
210037_s_at	0.0230959	0.000602	3.89	-0.292643	2.29	NOS2	nitric oxide synthase 2
219725_at	0.0230959	0.000602	3.89	-0.293031	0.4	TREM2	triggering receptor expressed on myeloid cells 2
228014_at	0.0231575	0.000605	3.89	-0.296528	0.429	PTRH1	peptidyl-tRNA hydrolase 1 homolog
228486_at	0.0231575	0.000605	-3.89	-0.297046	-0.808	SLC44A1	solute carrier family 44 member 1
208757_at	0.0231575	0.000605	3.89	-0.297418	0.506	TMED9	transmembrane p24 trafficking protein 9
238545_at	0.0231953	0.000607	-3.89	-0.299564	-0.283	BRD7	bromodomain containing 7
225982_at	0.0232224	0.000608	-3.89	-0.301356	-0.374	UBTF	upstream binding transcription factor, RNA polymerase I
200778_s_at	0.0232224	0.000608	3.89	-0.301952	0.387	2019-09-02	septin 2
201954_at	0.0232224	0.000609	3.89	-0.302568	0.742	ARPC1B	actin related protein 2/3 complex subunit 1B
223216_x_at	0.0232406	0.00061	-3.89	-0.304348	-0.62	FBXO16///ZNF395	F-box protein 16///zinc finger protein 395
217969_at	0.0232406	0.00061	-3.89	-0.304575	-0.525	VPS51	VPS51, GARP complex subunit
201801_s_at	0.023248	0.000611	3.89	-0.306161	0.651	SLC29A1	solute carrier family 29 member 1 (Augustine blood group)
212109_at	0.023248	0.000611	-3.89	-0.306718	-0.407	HN1L	hematological and neurological expressed 1 like
217724_at	0.023248	0.000611	-3.89	-0.30679	-0.405	SERBP1	SERPINE1 mRNA binding protein 1
224749_at	0.0232915	0.000613	-3.89	-0.309153	-0.501	FAM234A	family with sequence similarity 234 member A
224250_s_at	0.0233107	0.000614	-3.88	-0.310551	-0.447	SECISBP2	SECIS binding protein 2
226462_at	0.0233728	0.000616	3.88	-0.313832	0.604	STXBP6	syntaxin binding protein 6
203244_at	0.0233728	0.000616	-3.88	-0.314281	-0.409	PEX5	peroxisomal biogenesis factor 5
1554094_at	0.0234267	0.000618	-3.88	-0.317219	-1.29	ENTPD5	ectonucleoside triphosphate diphosphohydrolase 5
228562_at	0.0234267	0.000619	-3.88	-0.317676	-1	ZBTB10	zinc finger and BTB domain containing 10
213229_at	0.0234549	0.00062	-3.88	-0.319422	-0.519	DICER1	dicer 1, ribonuclease III
226100_at	0.0234656	0.000621	-3.88	-0.320478	-0.726	KMT2E	lysine methyltransferase 2E
203075_at	0.0235127	0.000622	-3.88	-0.322963	-0.445	SMAD2	SMAD family member 2
210225_x_at	0.0236067	0.000625	3.88	-0.327408	0.453	LILRB3	leukocyte immunoglobulin like receptor B3
201515_s_at	0.0236067	0.000626	-3.88	-0.327973	-0.26	TSN	translin
227506_at	0.0236067	0.000626	-3.88	-0.328545	-2.63	SLC16A9	solute carrier family 16 member 9
1558944_at	0.0236208	0.000627	-3.88	-0.330076	-0.26	LOC100507353///CACNA1A	uncharacterized LOC100507353///calcium voltage-gated channel subunit alpha1 A
218943_s_at	0.0236208	0.000627	3.88	-0.330363	0.97	DDX58	DEXD/H-box helicase 58
211913_s_at	0.0236643	0.000629	3.88	-0.332691	0.647	MERTK	MER proto-oncogene, tyrosine kinase
1559696_at	0.023682	0.00063	-3.88	-0.334012	-0.382
217809_at	0.0236923	0.00063	-3.87	-0.335045	-0.588	BZW2	basic leucine zipper and W2 domains 2
232942_at	0.0237254	0.000632	3.87	-0.337209	0.338	PYROXD2	pyridine nucleotide-disulphide oxidoreductase domain 2
211982_x_at	0.0237254	0.000632	-3.87	-0.337596	-0.303	XPO6	exportin 6
204006_s_at	0.02388	0.000637	3.87	-0.344209	2.5	FCGR3B///FCGR3A	Fc fragment of IgG receptor IIIb///Fc fragment of IgG receptor IIIa
225455_at	0.0238916	0.000638	-3.87	-0.345283	-0.581	TADA1	transcriptional adaptor 1
219857_at	0.0239485	0.00064	3.87	-0.348107	0.504	PLEKHS1	pleckstrin homology domain containing S1
209623_at	0.0240049	0.000642	-3.87	-0.351344	-0.361	MCCC2	methylcrotonoyl-CoA carboxylase 2
219263_at	0.0240049	0.000642	-3.87	-0.351772	-0.998	RNF128	ring finger protein 128, E3 ubiquitin protein ligase
223070_at	0.0240049	0.000642	3.87	-0.35216	0.499	SELK	selenoprotein K
239953_at	0.0241801	0.000648	-3.86	-0.359727	-0.288	ENTPD6	ectonucleoside triphosphate diphosphohydrolase 6 (putative)
236251_at	0.0241801	0.000648	3.86	-0.360227	0.814
207076_s_at	0.0241801	0.000648	3.86	-0.360743	1.07	ASS1	argininosuccinate synthase 1
212493_s_at	0.0242092	0.00065	-3.86	-0.362573	-0.51	SETD2	SET domain containing 2
227120_at	0.0242092	0.00065	-3.86	-0.363107	-0.418	FOXP4	forkhead box P4
229091_s_at	0.0242092	0.00065	-3.86	-0.363731	-0.528	CCNJ	cyclin J
208250_s_at	0.0242116	0.000651	3.86	-0.364449	2.78	DMBT1	deleted in malignant brain tumors 1
226806_s_at	0.0242201	0.000652	-3.86	-0.3654	-0.505	NFIA	nuclear factor I A
238337_s_at	0.0243393	0.000655	-3.86	-0.370542	-0.353	DNAJC21	DnaJ heat shock protein family (Hsp40) member C21
203221_at	0.0243933	0.000657	-3.86	-0.373537	-0.591	TLE1	transducin like enhancer of split 1
242888_at	0.0243933	0.000658	-3.86	-0.373833	-0.584	PRRT3-AS1	PRRT3 antisense RNA 1
228411_at	0.0244094	0.000659	-3.86	-0.375671	-0.861	PARD3B	par-3 family cell polarity regulator beta
211590_x_at	0.0244094	0.000659	3.86	-0.376334	0.266	TBXA2R	thromboxane A2 receptor
228743_at	0.0244094	0.00066	-3.86	-0.376601	-0.52	TXNDC17	thioredoxin domain containing 17
209480_at	0.0244094	0.00066	3.86	-0.377085	2.71	HLA-DQB1	major histocompatibility complex, class II, DQ beta 1
204392_at	0.0244094	0.00066	3.86	-0.377558	0.388	CAMK1	calcium/calmodulin dependent protein kinase I
203197_s_at	0.024411	0.000661	3.86	-0.378489	0.273	C1orf123	chromosome 1 open reading frame 123
1558412_at	0.024411	0.000661	-3.86	-0.378862	-0.372	MIR1199///MISP3	microRNA 1199///MISP family member 3
210990_s_at	0.0244673	0.000663	3.86	-0.381603	0.513	LAMA4	laminin subunit alpha 4
211430_s_at	0.0245306	0.000665	3.85	-0.384602	2.52	MIR8071-2///MIR8071-1///IGHV4-31///IGHM///IGHG2///IGHG1	microRNA 8071-2///microRNA 8071-1///immunoglobulin heavy variable 4-31///immunoglobulin heavy constant mu///immunoglobulin heavy constant gamma 2 (G2m marker)///immunoglobulin heavy constant gamma 1 (G1m marker)
226712_at	0.0245617	0.000667	3.85	-0.387294	0.679	SSR1	signal sequence receptor subunit 1
225723_at	0.0245617	0.000667	3.85	-0.387389	0.729	CCDC167	coiled-coil domain containing 167
221820_s_at	0.0245617	0.000668	-3.85	-0.388797	-0.387	KAT8	lysine acetyltransferase 8
244098_at	0.0245617	0.000669	-3.85	-0.389369	-0.204
228292_at	0.0245617	0.000669	-3.85	-0.389838	-0.526
224512_s_at	0.0245617	0.000669	3.85	-0.390078	0.344	NAA38	N(alpha)-acetyltransferase 38, NatC auxiliary subunit
227800_at	0.0245617	0.00067	-3.85	-0.390892	-0.253	FAM110B	family with sequence similarity 110 member B
226817_at	0.0245617	0.00067	-3.85	-0.391401	-0.718	DSC2	desmocollin 2
213553_x_at	0.0245617	0.00067	3.85	-0.391433	0.718	APOC1	apolipoprotein C1
203675_at	0.0245617	0.000671	3.85	-0.391964	1.19	NUCB2	nucleobindin 2
1561167_at	0.0245617	0.000671	3.85	-0.39257	0.948
217076_s_at	0.0245668	0.000672	-3.85	-0.393377	-0.287	LOC401021///HOXD4///HOXD3	uncharacterized LOC401021///homeobox D4///homeobox D3
1561056_a_at	0.0246103	0.000674	3.85	-0.396036	0.334
1555349_a_at	0.0246103	0.000674	3.85	-0.396238	1.5	ITGB2	integrin subunit beta 2
205975_s_at	0.0246231	0.000675	-3.85	-0.397481	-0.872	HOXD1	homeobox D1
218738_s_at	0.0246231	0.000676	-3.85	-0.398555	-0.66	RNF138	ring finger protein 138
209588_at	0.0246231	0.000676	-3.85	-0.398558	-0.388	EPHB2	EPH receptor B2
203373_at	0.0246296	0.000676	-3.85	-0.39944	-0.72	SOCS2	suppressor of cytokine signaling 2
213997_at	0.0246296	0.000677	-3.85	-0.400325	-0.816	FAM189A1	family with sequence similarity 189 member A1
244534_at	0.0246296	0.000677	-3.85	-0.40064	-0.646
210101_x_at	0.0246449	0.000678	3.85	-0.401825	0.434	SH3GLB1	SH3 domain containing GRB2 like endophilin B1
202954_at	0.0246543	0.000679	3.85	-0.402935	0.708	UBE2C	ubiquitin conjugating enzyme E2 C
211285_s_at	0.0246543	0.000679	-3.85	-0.403399	-0.27	UBE3A	ubiquitin protein ligase E3A
205283_at	0.0246569	0.00068	-3.85	-0.404407	-0.652	FKTN	fukutin
206949_s_at	0.0246569	0.00068	-3.85	-0.405277	-0.478	RUSC1	RUN and SH3 domain containing 1
229204_at	0.0246569	0.000681	-3.85	-0.405543	-0.492	HP1BP3	heterochromatin protein 1 binding protein 3
226922_at	0.0246569	0.000681	-3.85	-0.405937	-0.646	RANBP2	RAN binding protein 2
205686_s_at	0.024714	0.000683	3.84	-0.408674	0.679	CD86	CD86 molecule
219062_s_at	0.0247373	0.000684	-3.84	-0.410406	-0.553	ZCCHC2	zinc finger CCHC-type containing 2
201050_at	0.0247373	0.000685	3.84	-0.410757	0.554	PLD3	phospholipase D family member 3
205219_s_at	0.0247442	0.000686	3.84	-0.413005	0.514	GALK2	galactokinase 2
226867_at	0.0247442	0.000686	-3.84	-0.413246	-0.612	DENND4C	DENN domain containing 4C
201444_s_at	0.0247442	0.000686	3.84	-0.413381	0.28	ATP6AP2	ATPase H+ transporting accessory protein 2
1566039_a_at	0.0247442	0.000687	-3.84	-0.413446	-0.229	LOC100996385	uncharacterized LOC100996385
215214_at	0.0247612	0.000688	3.84	-0.41508	2.64	IGLC1	immunoglobulin lambda constant 1
1007_s_at	0.0247612	0.000688	-3.84	-0.41529	-0.576	MIR4640///DDR1	microRNA 4640///discoidin domain receptor tyrosine kinase 1
223295_s_at	0.0247978	0.00069	-3.84	-0.417587	-0.424	LUC7L	LUC7 like
228964_at	0.0247978	0.00069	3.84	-0.417861	1.76	PRDM1	PR/SET domain 1
242272_at	0.0248089	0.000691	-3.84	-0.418877	-0.376	ZNF785	zinc finger protein 785
231894_at	0.0248203	0.000691	-3.84	-0.419904	-0.873	SARS	seryl-tRNA synthetase
201245_s_at	0.0248213	0.000692	3.84	-0.420688	0.298	LOC101927673///OTUB1	uncharacterized LOC101927673///OTU deubiquitinase, ubiquitin aldehyde binding 1
204433_s_at	0.0248213	0.000692	-3.84	-0.421149	-0.565	SPATA2	spermatogenesis associated 2
241680_at	0.0248278	0.000693	-3.84	-0.422133	-0.289
211858_x_at	0.0248278	0.000693	3.84	-0.422594	0.261	GNAS	GNAS complex locus
225589_at	0.0248341	0.000694	-3.84	-0.42343	-0.822	SH3RF1	SH3 domain containing ring finger 1
209436_at	0.0248476	0.000695	-3.84	-0.424535	-1.17	SPON1	spondin 1
201649_at	0.0249469	0.000698	3.84	-0.428805	1.48	UBE2L6	ubiquitin conjugating enzyme E2 L6
210046_s_at	0.0249611	0.000699	3.84	-0.429931	0.576	IDH2	isocitrate dehydrogenase (NADP(+)) 2, mitochondrial
226206_at	0.0249651	0.000701	-3.83	-0.431991	-0.543	MAFK	MAF bZIP transcription factor K
209759_s_at	0.0249651	0.000701	-3.83	-0.432214	-0.569	ECI1	enoyl-CoA delta isomerase 1
211799_x_at	0.0249651	0.000701	3.83	-0.43268	0.63	HLA-C	major histocompatibility complex, class I, C
1555123_at	0.0249651	0.000701	-3.83	-0.432736	-1.18	ST6GAL2	ST6 beta-galactoside alpha-2,6-sialyltransferase 2
212200_at	0.0249651	0.000702	-3.83	-0.433703	-0.603	ANKLE2	ankyrin repeat and LEM domain containing 2
222603_at	0.0249651	0.000702	-3.83	-0.43439	-0.722	ERMP1	endoplasmic reticulum metallopeptidase 1
211729_x_at	0.0249651	0.000702	3.83	-0.43449	1.2	BLVRA	biliverdin reductase A
204775_at	0.0249651	0.000703	3.83	-0.435099	0.306	CHAF1B	chromatin assembly factor 1 subunit B
226742_at	0.0249651	0.000703	-3.83	-0.435472	-0.442	SAR1B	secretion associated Ras related GTPase 1B
231843_at	0.0249894	0.000704	-3.83	-0.436965	-0.516	DDX55	DEAD-box helicase 55
229418_at	0.0250118	0.000705	-3.83	-0.438386	-0.262	FAM222B	family with sequence similarity 222 member B
203045_at	0.0250294	0.000706	3.83	-0.439631	0.516	NINJ1	ninjurin 1
238539_at	0.0250366	0.000707	3.83	-0.440492	0.433	HPS3	HPS3, biogenesis of lysosomal organelles complex 2 subunit 1
1570087_at	0.0250384	0.000708	3.83	-0.441733	0.305
209395_at	0.0250384	0.000708	3.83	-0.441747	4.07	CHI3L1	chitinase 3 like 1
227541_at	0.0250413	0.000709	-3.83	-0.442449	-0.504	WDR20	WD repeat domain 20
226052_at	0.0251223	0.000711	-3.83	-0.446015	-0.389	BRD4	bromodomain containing 4
234649_at	0.0251444	0.000712	3.83	-0.44742	0.513
52005_at	0.0251561	0.000713	-3.83	-0.448442	-0.336	WIZ	widely interspaced zinc finger motifs
225649_s_at	0.0251684	0.000714	-3.83	-0.449484	-0.392	STK35	serine/threonine kinase 35
227576_at	0.0252499	0.000717	3.83	-0.453054	0.792
217390_x_at	0.0252499	0.000717	3.83	-0.453642	0.453
229483_at	0.0252849	0.000719	3.82	-0.455975	0.916
226009_at	0.0252849	0.000719	3.82	-0.456103	0.393	DPCD	deleted in primary ciliary dyskinesia homolog (mouse)
228773_at	0.02541	0.000723	3.82	-0.46161	0.397	LOC100506100	uncharacterized LOC100506100
206175_x_at	0.02541	0.000724	3.82	-0.461825	0.39	ZNF222	zinc finger protein 222
217198_x_at	0.0254918	0.000726	3.82	-0.465373	1.59	IGHG1///IGHD///IGHA2///IGH	immunoglobulin heavy constant gamma 1 (G1m marker)///immunoglobulin heavy constant delta///immunoglobulin heavy constant alpha 2 (A2m marker)///immunoglobulin heavy locus
211208_s_at	0.025492	0.000728	-3.82	-0.466784	-0.35	CASK	calcium/calmodulin dependent serine protein kinase
1554383_a_at	0.025492	0.000728	3.82	-0.467655	0.522	TRAM2	translocation associated membrane protein 2
224755_at	0.025492	0.000729	-3.82	-0.468228	-0.417	TM9SF3	transmembrane 9 superfamily member 3
215855_s_at	0.025492	0.000729	3.82	-0.468582	0.555	TMF1	TATA element modulatory factor 1
215236_s_at	0.025492	0.000729	3.82	-0.469168	0.501	PICALM	phosphatidylinositol binding clathrin assembly protein
218993_at	0.025492	0.00073	-3.82	-0.469414	-0.514	MRM3	mitochondrial rRNA methyltransferase 3
203798_s_at	0.025492	0.00073	3.82	-0.469628	1.16	VSNL1	visinin like 1
207485_x_at	0.025492	0.00073	3.82	-0.470093	0.71	BTN3A1	butyrophilin subfamily 3 member A1
233000_x_at	0.0255006	0.000731	-3.82	-0.470989	-0.248	DPH3P1	diphthamide biosynthesis 3 pseudogene 1
214291_at	0.0255184	0.000732	-3.82	-0.47222	-0.598	RPL17-C18orf32///SNORD58C///SNORD58A///SNORD58B///RPL17	RPL17-C18orf32 readthrough///small nucleolar RNA, C/D box 58C///small nucleolar RNA, C/D box 58A///small nucleolar RNA, C/D box 58B///ribosomal protein L17
204897_at	0.0255698	0.000734	-3.82	-0.47484	-0.551	PTGER4	prostaglandin E receptor 4
203988_s_at	0.0255698	0.000734	3.82	-0.475242	1.34	FUT8	fucosyltransferase 8
206470_at	0.0255814	0.000735	3.82	-0.476245	0.727	PLXNC1	plexin C1
1557521_a_at	0.0256306	0.000737	-3.82	-0.478601	-0.738
219104_at	0.0256483	0.000738	3.81	-0.479834	0.496	RNF141	ring finger protein 141
201501_s_at	0.0256483	0.000739	-3.81	-0.481177	-0.507	GRSF1	G-rich RNA sequence binding factor 1
228930_at	0.0256483	0.00074	-3.81	-0.482599	-0.603	SCARNA15	small Cajal body-specific RNA 15
243345_at	0.0256483	0.00074	-3.81	-0.482733	-0.289	RNF14	ring finger protein 14
218926_at	0.0256483	0.00074	-3.81	-0.482767	-0.355	MYNN	myoneurin
229390_at	0.0256483	0.000741	3.81	-0.483373	2.13	FAM26F	family with sequence similarity 26 member F
214106_s_at	0.0256483	0.000741	3.81	-0.483633	0.58	GMDS	GDP-mannose 4,6-dehydratase
202591_s_at	0.0256483	0.000741	3.81	-0.483905	0.391	SSBP1	single stranded DNA binding protein 1
227562_at	0.0256995	0.000744	-3.81	-0.486808	-0.699	LAMTOR3	late endosomal/lysosomal adaptor, MAPK and MTOR activator 3
218187_s_at	0.0256995	0.000744	-3.81	-0.487206	-0.874	C8orf33	chromosome 8 open reading frame 33
225468_at	0.0256995	0.000745	3.81	-0.488623	0.522	PATL1	PAT1 homolog 1, processing body mRNA decay factor
203994_s_at	0.0256995	0.000745	-3.81	-0.488921	-0.305	C21orf2	chromosome 21 open reading frame 2
244828_x_at	0.0256995	0.000745	-3.81	-0.48901	-0.582	NAF1	nuclear assembly factor 1 ribonucleoprotein
1564300_at	0.0256995	0.000745	3.81	-0.489224	0.218	IQCF5-AS1	IQCF5 antisense RNA 1
242781_at	0.0257012	0.000746	3.81	-0.489877	0.431	FAM199X	family with sequence similarity 199, X-linked
214196_s_at	0.0257012	0.000747	3.81	-0.491182	0.43	TPP1	tripeptidyl peptidase 1
219518_s_at	0.0257012	0.000747	-3.81	-0.491466	-0.883	ELL3	elongation factor for RNA polymerase II 3
205467_at	0.0257012	0.000748	3.81	-0.492156	0.692	CASP10	caspase 10
210815_s_at	0.0257012	0.000748	3.81	-0.492402	1.08	CALCRL	calcitonin receptor like receptor
227679_at	0.0257012	0.000749	-3.81	-0.492964	-0.479	HDAC11	histone deacetylase 11
203472_s_at	0.0257012	0.000749	3.81	-0.493337	0.611	SLCO2B1	solute carrier organic anion transporter family member 2B1
229160_at	0.025711	0.00075	-3.81	-0.494265	-0.284	MUM1L1	MUM1 like 1
214783_s_at	0.0257409	0.000751	-3.81	-0.49591	-0.417	ANXA11	annexin A11
1552610_a_at	0.0257532	0.000753	3.81	-0.498015	0.608	JAK1	Janus kinase 1
1569603_at	0.0257532	0.000753	3.81	-0.498234	0.218
1554555_a_at	0.0257532	0.000753	-3.81	-0.498509	-0.698	SETD6	SET domain containing 6
221286_s_at	0.0257532	0.000753	3.81	-0.49892	1.84	MZB1	marginal zone B and B1 cell specific protein
229410_at	0.0257532	0.000754	-3.81	-0.499545	-0.37	SLC35E1	solute carrier family 35 member E1
210724_at	0.0257532	0.000754	3.81	-0.499802	0.354	ADGRE3	adhesion G protein-coupled receptor E3
230926_s_at	0.0258012	0.000756	3.81	-0.50209	0.619	ODF2L	outer dense fiber of sperm tails 2 like
225926_at	0.0258698	0.000758	-3.8	-0.505106	-0.589	VTI1B	vesicle transport through interaction with t-SNAREs 1B
204725_s_at	0.0259392	0.000761	3.8	-0.508146	0.518	NCK1	NCK adaptor protein 1
222488_s_at	0.0259483	0.000762	-3.8	-0.509447	-0.314	DCTN4	dynactin subunit 4
201424_s_at	0.0259483	0.000763	-3.8	-0.51034	-0.389	CUL4A	cullin 4A
1567105_at	0.0259483	0.000763	3.8	-0.510537	0.568
216231_s_at	0.0259483	0.000763	3.8	-0.510759	0.302	B2M	beta-2-microglobulin
AFFX-CreX-5_at	0.025959	0.000764	-3.8	-0.511709	-0.427
205886_at	0.025972	0.000765	3.8	-0.51274	5.42	REG1B	regenerating family member 1 beta
226565_at	0.0260516	0.000768	-3.8	-0.516126	-0.612	TMEM99	transmembrane protein 99
209431_s_at	0.026074	0.000769	-3.8	-0.517489	-0.495	PATZ1	POZ/BTB and AT hook containing zinc finger 1
217924_at	0.0261296	0.000771	3.8	-0.520017	0.445	C6orf106	chromosome 6 open reading frame 106
226977_at	0.0261301	0.000771	-3.8	-0.520606	-0.396	IGIP	IgA inducing protein
212361_s_at	0.0261315	0.000772	-3.8	-0.521223	-0.513	ATP2A2	ATPase sarcoplasmic/endoplasmic reticulum Ca2+ transporting 2
229348_at	0.0261445	0.000773	-3.8	-0.522249	-0.422	UBIAD1	UbiA prenyltransferase domain containing 1
213318_s_at	0.0261729	0.000774	-3.8	-0.523947	-0.363	BAG6	BCL2 associated athanogene 6
221543_s_at	0.0261729	0.000775	-3.8	-0.524385	-0.683	ERLIN2	ER lipid raft associated 2
212690_at	0.0261963	0.000776	-3.8	-0.525776	-0.531	DDHD2	DDHD domain containing 2
211162_x_at	0.0262341	0.000777	3.79	-0.527673	0.918	SCD	stearoyl-CoA desaturase
206978_at	0.0262446	0.000778	3.79	-0.528607	1.33	CCR2	C-C motif chemokine receptor 2
226163_at	0.0262632	0.000779	-3.79	-0.529827	-0.504	ZBTB9	zinc finger and BTB domain containing 9
90265_at	0.0262713	0.00078	-3.79	-0.530675	-0.536	ADAP1	ArfGAP with dual PH domains 1
213369_at	0.026273	0.00078	-3.79	-0.531301	-1.77	CDHR1	cadherin related family member 1
212311_at	0.0263123	0.000782	3.79	-0.533243	0.751	SEL1L3	SEL1L family member 3
233341_s_at	0.026338	0.000783	-3.79	-0.53483	-0.742	POLR1B	RNA polymerase I subunit B
223356_s_at	0.026338	0.000784	3.79	-0.53527	0.356	MTIF3	mitochondrial translational initiation factor 3
212115_at	0.0263414	0.000785	-3.79	-0.536917	-0.398	HN1L	hematological and neurological expressed 1 like
217867_x_at	0.0263414	0.000785	3.79	-0.53692	1.51	BACE2	beta-site APP-cleaving enzyme 2
203709_at	0.0263414	0.000785	-3.79	-0.537084	-0.328	PHKG2	phosphorylase kinase catalytic subunit gamma 2
227001_at	0.0263575	0.000786	-3.79	-0.53821	-0.69	NIPAL2	NIPA like domain containing 2
224283_x_at	0.026401	0.000788	3.79	-0.540291	0.245	IL18BP	interleukin 18 binding protein
231950_at	0.0264436	0.00079	-3.79	-0.542336	-0.311	ZNF658	zinc finger protein 658
215966_x_at	0.0264638	0.000791	3.79	-0.544265	0.598	GK3P	glycerol kinase 3 pseudogene
226908_at	0.0264638	0.000792	-3.79	-0.544624	-0.822	LRIG3	leucine rich repeats and immunoglobulin like domains 3
219083_at	0.0264638	0.000792	-3.79	-0.544725	-0.461	SHQ1	SHQ1, H/ACA ribonucleoprotein assembly factor
210644_s_at	0.0264838	0.000793	3.79	-0.545984	0.834	LAIR1	leukocyte associated immunoglobulin like receptor 1
228131_at	0.0264873	0.000794	-3.79	-0.547222	-0.651	ERCC1	ERCC excision repair 1, endonuclease non-catalytic subunit
208705_s_at	0.0264873	0.000794	3.79	-0.547226	0.451	EIF5	eukaryotic translation initiation factor 5
229182_at	0.026494	0.000795	-3.79	-0.548021	-0.419	MIR4723///TMEM199	microRNA 4723///transmembrane protein 199
210115_at	0.0265468	0.000797	3.79	-0.550482	0.543	RPL39L	ribosomal protein L39 like
219594_at	0.0265468	0.000797	3.78	-0.550972	0.637	NINJ2	ninjurin 2
224881_at	0.0265532	0.000799	-3.78	-0.552797	-0.566	VKORC1L1	vitamin K epoxide reductase complex subunit 1 like 1
203088_at	0.0265532	0.000799	3.78	-0.55298	0.779	FBLN5	fibulin 5
203676_at	0.0265532	0.000799	3.78	-0.553253	0.542	GNS	glucosamine (N-acetyl)-6-sulfatase
241402_at	0.0265532	0.000799	-3.78	-0.553509	-0.57	TSEN54	tRNA splicing endonuclease subunit 54
218847_at	0.0265532	0.0008	-3.78	-0.55399	-0.715	IGF2BP2	insulin like growth factor 2 mRNA binding protein 2
1554930_a_at	0.0265747	0.000801	3.78	-0.55543	1.15	FUT8	fucosyltransferase 8
233614_at	0.0265747	0.000802	3.78	-0.556401	0.534
221704_s_at	0.0265747	0.000802	-3.78	-0.556408	-0.608	VPS37B	VPS37B, ESCRT-I subunit
222702_x_at	0.0265765	0.000803	3.78	-0.557027	0.416	CRIPT	CXXC repeat containing interactor of PDZ3 domain
213617_s_at	0.0266079	0.000804	3.78	-0.559108	0.51	TPGS2	tubulin polyglutamylase complex subunit 2
1554285_at	0.0266079	0.000805	3.78	-0.559931	0.342	HAVCR2	hepatitis A virus cellular receptor 2
209313_at	0.0266079	0.000806	-3.78	-0.560671	-0.254	GPN1	GPN-loop GTPase 1
213725_x_at	0.0266079	0.000806	-3.78	-0.561115	-0.751	XYLT1	xylosyltransferase 1
206874_s_at	0.0266079	0.000806	-3.78	-0.561258	-0.711	SLK	STE20 like kinase
225319_s_at	0.0266079	0.000806	-3.78	-0.561448	-0.433	FAM104A	family with sequence similarity 104 member A
222757_s_at	0.0266177	0.000807	3.78	-0.562341	0.728	ZAK	sterile alpha motif and leucine zipper containing kinase AZK
204959_at	0.0266324	0.000808	3.78	-0.563401	1.88	MNDA	myeloid cell nuclear differentiation antigen
223220_s_at	0.0266405	0.000809	3.78	-0.564235	1.21	PARP9	poly(ADP-ribose) polymerase family member 9
219919_s_at	0.0266678	0.00081	-3.78	-0.565732	-0.36	SSH3	slingshot protein phosphatase 3
225574_at	0.0266697	0.000811	-3.78	-0.566352	-0.508	RWDD4	RWD domain containing 4
214727_at	0.0266821	0.000812	3.78	-0.568097	0.424	BRCA2	BRCA2, DNA repair associated
1553842_at	0.0266821	0.000813	-3.78	-0.568429	-0.163	BEND2	BEN domain containing 2
213623_at	0.0266821	0.000813	3.78	-0.568434	0.32	KIF3A	kinesin family member 3A
233208_x_at	0.0267641	0.000816	3.78	-0.572051	0.405	CPSF2	cleavage and polyadenylation specific factor 2
208983_s_at	0.0267641	0.000816	3.78	-0.572362	1.95	PECAM1	platelet and endothelial cell adhesion molecule 1
230612_at	0.0268457	0.000819	-3.77	-0.575712	-0.231	SCAND2P	SCAN domain containing 2 pseudogene
213247_at	0.0268814	0.000821	3.77	-0.577485	0.593	SVEP1	sushi, von Willebrand factor type A, EGF and pentraxin domain containing 1
209094_at	0.0268897	0.000821	-3.77	-0.578317	-0.606	DDAH1	dimethylarginine dimethylaminohydrolase 1
218542_at	0.026937	0.000823	3.77	-0.580485	1.12	CEP55	centrosomal protein 55
202718_at	0.0269946	0.000826	3.77	-0.582997	1.03	IGFBP2	insulin like growth factor binding protein 2
227301_at	0.0270272	0.000827	-3.77	-0.584837	-0.429	CCT6P1///CCT6P3	chaperonin containing TCP1 subunit 6 pseudogene 1///chaperonin containing TCP1 subunit 6 pseudogene 3
217883_at	0.0270272	0.000828	3.77	-0.585438	0.31	MMADHC	methylmalonic aciduria and homocystinuria, cblD type
207590_s_at	0.0270272	0.000829	3.77	-0.587323	0.413	CENPI	centromere protein I
220076_at	0.0270272	0.00083	-3.77	-0.587781	-0.662	ANKH	ANKH inorganic pyrophosphate transport regulator
205284_at	0.0270272	0.00083	-3.77	-0.588373	-0.923	URB2	URB2 ribosome biogenesis 2 homolog (S. cerevisiae)
200967_at	0.0270272	0.00083	3.77	-0.588411	0.464	PPIB	peptidylprolyl isomerase B
238077_at	0.0270272	0.000831	-3.77	-0.589147	-0.828	KCTD6	potassium channel tetramerization domain containing 6
223425_at	0.0270272	0.000831	-3.77	-0.589593	-0.389	RAVER1	ribonucleoprotein, PTB binding 1
214639_s_at	0.0270272	0.000832	-3.77	-0.590384	-0.558	HOXA1	homeobox A1
218868_at	0.0270272	0.000833	-3.77	-0.591498	-0.534	ACTR3B	ARP3 actin related protein 3 homolog B
213654_at	0.0270272	0.000834	-3.77	-0.591939	-0.329	TAF5L	TATA-box binding protein associated factor 5 like
211792_s_at	0.0270272	0.000834	3.77	-0.592005	0.439	CDKN2C	cyclin dependent kinase inhibitor 2C
213182_x_at	0.0270272	0.000834	3.77	-0.592166	0.282	CDKN1C	cyclin dependent kinase inhibitor 1C
232290_at	0.0270272	0.000834	3.77	-0.592596	0.738
209688_s_at	0.0270272	0.000834	-3.77	-0.592648	-0.465	CCDC93	coiled-coil domain containing 93
202917_s_at	0.0270272	0.000834	3.77	-0.592864	3.77	S100A8	S100 calcium binding protein A8
1557820_at	0.027047	0.000836	-3.77	-0.59408	-0.98	AFG3L2	AFG3 like matrix AAA peptidase subunit 2
204972_at	0.0270477	0.000836	3.77	-0.594649	1.38	OAS2	2'-5'-oligoadenylate synthetase 2
226671_at	0.0270745	0.000837	-3.77	-0.596101	-0.903	LAMP2	lysosomal associated membrane protein 2
208805_at	0.0271507	0.00084	3.76	-0.599231	0.352	KIAA0391///PSMA6	KIAA0391///proteasome subunit alpha 6
214363_s_at	0.0271527	0.000841	-3.76	-0.599969	-0.282	SNHG4///MATR3	small nucleolar RNA host gene 4///matrin 3
219079_at	0.0271527	0.000842	3.76	-0.600872	0.463	CYB5R4	cytochrome b5 reductase 4
236899_at	0.0271527	0.000842	-3.76	-0.600925	-0.274
208799_at	0.0271727	0.000843	3.76	-0.602145	0.396	PSMB5	proteasome subunit beta 5
AFFX-CreX-3_at	0.0272034	0.000844	-3.76	-0.603723	-0.364
204829_s_at	0.0272681	0.000847	3.76	-0.606451	0.639	FOLR2	folate receptor beta
213251_at	0.0273009	0.000848	-3.76	-0.608096	-0.375	SMARCA5	SWI/SNF related, matrix associated, actin dependent regulator of chromatin, subfamily a, member 5
239654_at	0.027321	0.00085	3.76	-0.609747	0.706	CHD9	chromodomain helicase DNA binding protein 9
225009_at	0.027321	0.00085	-3.76	-0.610307	-0.815	CMTM4	CKLF like MARVEL transmembrane domain containing 4
243405_at	0.027321	0.00085	-3.76	-0.610392	-0.429
230011_at	0.0273267	0.000851	3.76	-0.611124	1.11	MEI1	meiotic double-stranded break formation protein 1
225380_at	0.0273432	0.000852	-3.76	-0.612559	-1.11	PKDCC	protein kinase domain containing, cytoplasmic
227964_at	0.0273432	0.000853	-3.76	-0.61276	-0.665	FRMD8	FERM domain containing 8
221931_s_at	0.0273833	0.000854	-3.76	-0.614645	-0.798	SEH1L	SEH1 like nucleoporin
210519_s_at	0.0274169	0.000856	3.76	-0.616601	1.06	NQO1	NAD(P)H quinone dehydrogenase 1
203343_at	0.0274169	0.000856	-3.76	-0.61685	-0.922	UGDH	UDP-glucose 6-dehydrogenase
1562916_at	0.0274319	0.000857	-3.76	-0.61789	-0.204	LINC00102	long intergenic non-protein coding RNA 102
206734_at	0.0274886	0.00086	-3.76	-0.620619	-0.487	JRKL	JRK-like
228402_at	0.0274886	0.00086	-3.76	-0.620863	-0.379	ZBED3	zinc finger BED-type containing 3
212170_at	0.0275087	0.000861	-3.76	-0.622072	-0.669	RBM12	RNA binding motif protein 12
207253_s_at	0.0275321	0.000863	-3.75	-0.623477	-0.282	UBN1	ubinuclein 1
219741_x_at	0.0275321	0.000863	-3.75	-0.623925	-0.572	ZNF552	zinc finger protein 552
215631_s_at	0.0275857	0.000865	-3.75	-0.626248	-0.403	BRMS1	breast cancer metastasis suppressor 1
212927_at	0.0276194	0.000867	-3.75	-0.628019	-0.633	SMC5	structural maintenance of chromosomes 5
202360_at	0.0276194	0.000867	-3.75	-0.628443	-0.328	MAML1	mastermind like transcriptional coactivator 1
233268_s_at	0.0277611	0.000873	3.75	-0.634114	0.442	CHURC1	churchill domain containing 1
203466_at	0.0277611	0.000873	3.75	-0.634215	0.386	MPV17	MPV17, mitochondrial inner membrane protein
200979_at	0.0277751	0.000874	-3.75	-0.635212	-0.822	PDHA1	pyruvate dehydrogenase (lipoamide) alpha 1
200890_s_at	0.0278384	0.000876	3.75	-0.637838	0.739	SSR1	signal sequence receptor subunit 1
217912_at	0.0278473	0.000877	-3.75	-0.638666	-0.4	DUS1L	dihydrouridine synthase 1 like
223347_at	0.027851	0.000878	-3.75	-0.639321	-0.569	MUM1	melanoma associated antigen (mutated) 1
208925_at	0.0278699	0.000879	3.75	-0.640479	0.464	CLDND1	claudin domain containing 1
211988_at	0.0278864	0.00088	-3.75	-0.641603	-0.29	SMARCE1	SWI/SNF related, matrix associated, actin dependent regulator of chromatin, subfamily e, member 1
226005_at	0.0278864	0.00088	-3.75	-0.642087	-0.416	UBE2G1	ubiquitin conjugating enzyme E2 G1
1565804_at	0.0279171	0.000882	3.75	-0.643633	0.508
210568_s_at	0.0279357	0.000883	3.75	-0.644943	0.728	RECQL	RecQ like helicase
212999_x_at	0.0279357	0.000884	3.75	-0.64572	1.59	LOC101060835///HLA-DQB1	HLA class II histocompatibility antigen, DQ beta 1 chain-like///major histocompatibility complex, class II, DQ beta 1
219161_s_at	0.0279357	0.000884	3.75	-0.645838	0.654	CKLF-CMTM1///CKLF	CKLF-CMTM1 readthrough///chemokine like factor
226848_at	0.0279416	0.000885	-3.74	-0.647246	-0.759
212802_s_at	0.0279416	0.000885	-3.74	-0.647413	-0.376	GAPVD1	GTPase activating protein and VPS9 domains 1
1564996_at	0.0279416	0.000886	-3.74	-0.648031	-0.224
225053_at	0.0279416	0.000886	-3.74	-0.648154	-0.399	CNOT7	CCR4-NOT transcription complex subunit 7
233445_at	0.0279817	0.000888	3.74	-0.650163	0.388
238883_at	0.0279817	0.000889	3.74	-0.650835	0.874
226511_at	0.0279817	0.00089	-3.74	-0.652039	-0.376	DCAF10	DDB1 and CUL4 associated factor 10
224698_at	0.0279817	0.00089	-3.74	-0.652302	-0.6	ESYT2	extended synaptotagmin 2
AFFX-DapX-5_at	0.0279817	0.000891	-3.74	-0.653096	-0.659
209835_x_at	0.0279817	0.000892	3.74	-0.654137	1.16	CD44	CD44 molecule (Indian blood group)
202496_at	0.0279817	0.000892	-3.74	-0.654394	-0.369	EDC4	enhancer of mRNA decapping 4
1562885_at	0.0279817	0.000892	3.74	-0.65453	0.277	LOC101929002	uncharacterized LOC101929002
218128_at	0.0279817	0.000893	-3.74	-0.6555	-0.492	NFYB	nuclear transcription factor Y subunit beta
239237_at	0.0279817	0.000894	3.74	-0.656132	0.712	TRG-AS1	T cell receptor gamma locus antisense RNA 1
234863_x_at	0.0279817	0.000894	3.74	-0.656499	0.498	FBXO5	F-box protein 5
228026_at	0.0279817	0.000894	-3.74	-0.656625	-0.577	SIKE1	suppressor of IKBKE 1
218984_at	0.0279817	0.000895	-3.74	-0.656765	-1.05	PUS7	pseudouridylate synthase 7 (putative)
217806_s_at	0.0279817	0.000895	-3.74	-0.656933	-0.422	POLDIP2	DNA polymerase delta interacting protein 2
202898_at	0.0279817	0.000895	3.74	-0.657389	0.569	SDC3	syndecan 3
200069_at	0.027989	0.000896	-3.74	-0.658242	-0.542	SART3	squamous cell carcinoma antigen recognized by T-cells 3
212383_at	0.027989	0.000896	-3.74	-0.658677	-0.383	ATP6V0A1	ATPase H+ transporting V0 subunit a1
217903_at	0.0279963	0.000897	-3.74	-0.65944	-0.558	STRN4	striatin 4
221381_s_at	0.0280078	0.000899	3.74	-0.661085	0.41	MORF4L1	mortality factor 4 like 1
227924_at	0.0280078	0.000899	3.74	-0.661394	0.466	INO80D	INO80 complex subunit D
211708_s_at	0.0280078	0.000899	3.74	-0.661464	1.28	SCD	stearoyl-CoA desaturase
201579_at	0.0280078	0.0009	-3.74	-0.662171	-0.45	FAT1	FAT atypical cadherin 1
205928_at	0.0280078	0.0009	-3.74	-0.662685	-0.75	ZNF443	zinc finger protein 443
65635_at	0.0280078	0.000901	-3.74	-0.662961	-0.283	ENGASE	endo-beta-N-acetylglucosaminidase
224751_at	0.0280097	0.000901	-3.74	-0.663545	-0.459	LOC101930655///C7orf73	uncharacterized LOC101930655///chromosome 7 open reading frame 73
209709_s_at	0.0280234	0.000903	3.74	-0.66502	1.12	HMMR	hyaluronan mediated motility receptor
243951_at	0.0280234	0.000903	-3.74	-0.665694	-1.36	ABCB1	ATP binding cassette subfamily B member 1
235663_at	0.0280234	0.000903	-3.74	-0.665858	-0.549
224076_s_at	0.0280234	0.000904	-3.74	-0.666081	-0.402	WHSC1L1	Wolf-Hirschhorn syndrome candidate 1-like 1
225120_at	0.02808	0.000906	-3.74	-0.668455	-0.309	MIR4657///PURB	microRNA 4657///purine rich element binding protein B
214873_at	0.0281008	0.000908	-3.73	-0.670445	-0.277	LRP5L	LDL receptor related protein 5 like
225997_at	0.0281008	0.000908	-3.73	-0.670542	-0.467	MOB1B	MOB kinase activator 1B
211467_s_at	0.0281008	0.000909	3.73	-0.671041	0.396	NFIB	nuclear factor I B
226223_at	0.0281008	0.000909	-3.73	-0.671219	-0.516	PAWR	pro-apoptotic WT1 regulator
207275_s_at	0.028165	0.000911	3.73	-0.673833	1.09	ACSL1	acyl-CoA synthetase long-chain family member 1
238183_at	0.0283513	0.000918	-3.73	-0.680412	-0.484
229267_at	0.0283786	0.000919	-3.73	-0.681813	-0.636	LOC730268///ANAPC1	anaphase-promoting complex subunit 1-like///anaphase promoting complex subunit 1
AFFX-BioB-3_at	0.0284313	0.000921	-3.73	-0.684036	-0.52
204593_s_at	0.0284358	0.000922	-3.73	-0.684701	-0.567	MIEF1	mitochondrial elongation factor 1
226030_at	0.0284399	0.000923	-3.73	-0.685352	-0.761	ACADSB	acyl-CoA dehydrogenase, short/branched chain
228282_at	0.0284532	0.000924	-3.73	-0.68677	-0.577	MFSD8	major facilitator superfamily domain containing 8
229391_s_at	0.0284532	0.000924	3.73	-0.686814	1.74	FAM26F	family with sequence similarity 26 member F
204875_s_at	0.0285289	0.000927	3.73	-0.689773	0.748	GMDS	GDP-mannose 4,6-dehydratase
207618_s_at	0.0285497	0.000928	-3.73	-0.69096	-0.471	BCS1L	BCS1 homolog, ubiquinol-cytochrome c reductase complex chaperone
209371_s_at	0.0285561	0.000929	3.73	-0.691818	0.416	SH3BP2	SH3 domain binding protein 2
204489_s_at	0.0285561	0.00093	3.73	-0.692199	0.976	CD44	CD44 molecule (Indian blood group)
224160_s_at	0.0285601	0.00093	-3.73	-0.692842	-0.374	ACAD9	acyl-CoA dehydrogenase family member 9
228977_at	0.0285834	0.000932	-3.72	-0.694371	-1.01	LOC729680	uncharacterized LOC729680
208675_s_at	0.0285834	0.000932	3.72	-0.694624	0.316	DDOST	dolichyl-diphosphooligosaccharide--protein glycosyltransferase non-catalytic subunit
209176_at	0.0285883	0.000934	-3.72	-0.696171	-0.402	SEC23IP	SEC23 interacting protein
244780_at	0.0285883	0.000934	-3.72	-0.696464	-1.05	SGPP2	sphingosine-1-phosphate phosphatase 2
228622_s_at	0.0285883	0.000934	-3.72	-0.696531	-0.479	DNAJC4	DnaJ heat shock protein family (Hsp40) member C4
235747_at	0.0285883	0.000935	-3.72	-0.697343	-0.625	LINC00849///SLC25A16	long intergenic non-protein coding RNA 849///solute carrier family 25 member 16
222025_s_at	0.0285883	0.000935	-3.72	-0.697352	-0.702	OPLAH	5-oxoprolinase (ATP-hydrolysing)
224366_s_at	0.0286093	0.000936	-3.72	-0.698541	-0.421	REPS1	RALBP1 associated Eps domain containing 1
212892_at	0.028636	0.000938	-3.72	-0.70032	-0.327	ZNF282	zinc finger protein 282
1553219_a_at	0.028636	0.000938	3.72	-0.700425	0.688	AMMECR1	Alport syndrome, mental retardation, midface hypoplasia and elliptocytosis chromosomal region gene 1
1555469_a_at	0.0286522	0.000939	3.72	-0.701587	0.486	CLASP2	cytoplasmic linker associated protein 2
223230_at	0.0286522	0.00094	-3.72	-0.70197	-0.486	PRPF38A	pre-mRNA processing factor 38A
217988_at	0.028667	0.000941	-3.72	-0.703075	-0.465	CCNB1IP1	cyclin B1 interacting protein 1
220475_at	0.028667	0.000941	3.72	-0.703466	0.447	SLC28A3	solute carrier family 28 member 3
204985_s_at	0.0286968	0.000943	-3.72	-0.70522	-0.628	TRAPPC6A	trafficking protein particle complex 6A
241321_at	0.0286968	0.000944	-3.72	-0.705897	-0.38
205963_s_at	0.0286968	0.000944	-3.72	-0.705955	-0.546	DNAJA3	DnaJ heat shock protein family (Hsp40) member A3
211080_s_at	0.0287018	0.000945	3.72	-0.70708	0.658	NEK2	NIMA related kinase 2
227274_at	0.0287018	0.000945	-3.72	-0.707137	-0.562	SYNJ2BP-COX16///SYNJ2BP	SYNJ2BP-COX16 readthrough///synaptojanin 2 binding protein
227980_at	0.0287153	0.000948	-3.72	-0.709966	-0.314	ZNF322	zinc finger protein 322
1554789_a_at	0.0287153	0.000948	-3.72	-0.710001	-0.188	PDE8B	phosphodiesterase 8B
208071_s_at	0.0287153	0.000949	3.72	-0.710897	0.517	LAIR1	leukocyte associated immunoglobulin like receptor 1
211676_s_at	0.0287153	0.000949	3.72	-0.711094	0.518	IFNGR1	interferon gamma receptor 1
1569477_at	0.0287153	0.000949	3.72	-0.711389	0.954
212481_s_at	0.0287153	0.00095	3.72	-0.711668	1	TPM4	tropomyosin 4
222742_s_at	0.0287153	0.00095	3.72	-0.712128	0.673	IFT22	intraflagellar transport 22
202184_s_at	0.0287153	0.000951	-3.72	-0.712801	-0.353	NUP133	nucleoporin 133
227538_at	0.0287153	0.000951	-3.72	-0.712892	-0.343	MED26	mediator complex subunit 26
212476_at	0.0287153	0.000951	-3.72	-0.7132	-0.487	ACAP2	ArfGAP with coiled-coil, ankyrin repeat and PH domains 2
219386_s_at	0.0287153	0.000951	3.72	-0.713484	1.41	SLAMF8	SLAM family member 8
236586_at	0.0287153	0.000952	-3.72	-0.713673	-0.512
1569238_a_at	0.0287285	0.000953	3.72	-0.714603	0.738
204288_s_at	0.0287704	0.000955	-3.72	-0.716561	-0.57	SORBS2	sorbin and SH3 domain containing 2
232744_x_at	0.0287704	0.000955	3.72	-0.716954	0.945
211014_s_at	0.0288003	0.000957	3.71	-0.718412	0.298	PML	promyelocytic leukemia
214830_at	0.0288317	0.000958	3.71	-0.71992	0.594	SLC38A6	solute carrier family 38 member 6
205385_at	0.0288366	0.000959	3.71	-0.720813	0.249	MDM2	MDM2 proto-oncogene
201457_x_at	0.0288366	0.000959	3.71	-0.721085	0.294	BUB3	BUB3, mitotic checkpoint protein
236414_at	0.0288723	0.000961	3.71	-0.722725	0.381
210428_s_at	0.0288774	0.000962	-3.71	-0.723393	-0.372	HGS	hepatocyte growth factor-regulated tyrosine kinase substrate
229721_x_at	0.0288846	0.000963	3.71	-0.724126	1.89	DERL3	derlin 3
208761_s_at	0.0289404	0.000966	3.71	-0.727079	0.213	SUMO1	small ubiquitin-like modifier 1
202640_s_at	0.0289404	0.000966	-3.71	-0.727256	-0.288	RANBP3	RAN binding protein 3
1553974_at	0.0289404	0.000966	-3.71	-0.72741	-0.539	C22orf39	chromosome 22 open reading frame 39
219402_s_at	0.0289895	0.000968	3.71	-0.729648	0.517	DERL1	derlin 1
200679_x_at	0.0289895	0.000969	3.71	-0.730568	0.588	HMGB1	high mobility group box 1
230461_s_at	0.0289895	0.000969	-3.71	-0.730686	-0.731	MUM1	melanoma associated antigen (mutated) 1
47560_at	0.0289895	0.00097	-3.71	-0.731228	-0.593	ADGRL1	adhesion G protein-coupled receptor L1
239462_at	0.0289895	0.00097	-3.71	-0.731481	-0.277	ZNF284	zinc finger protein 284
214714_at	0.0290295	0.000972	-3.71	-0.73347	-0.336	ZNF394	zinc finger protein 394
209527_at	0.0290295	0.000973	-3.71	-0.733747	-0.652	EXOSC2	exosome component 2
1553551_s_at	0.0290973	0.000975	-3.71	-0.736394	-0.281	ND2	MTND2
203255_at	0.0291121	0.000977	-3.71	-0.737361	-0.503	FBXO11	F-box protein 11
228257_at	0.0291125	0.000977	-3.71	-0.737872	-0.333	ANKRD52	ankyrin repeat domain 52
202813_at	0.0291144	0.000978	-3.71	-0.738434	-0.447	TARBP1	TAR (HIV-1) RNA binding protein 1
202788_at	0.0291382	0.000979	-3.71	-0.739684	-0.345	MAPKAPK3	mitogen-activated protein kinase-activated protein kinase 3
50221_at	0.0291448	0.00098	-3.71	-0.740809	-0.596	TFEB	transcription factor EB
240698_s_at	0.0291448	0.00098	-3.71	-0.740892	-0.358
1556608_a_at	0.0291689	0.000982	3.7	-0.742491	0.382	EHD4	EH domain containing 4
225261_x_at	0.0291689	0.000982	-3.7	-0.742859	-0.334	NELFCD	negative elongation factor complex member C/D
225397_at	0.0291689	0.000983	-3.7	-0.743148	-0.464	C15orf57	chromosome 15 open reading frame 57
205514_at	0.0291768	0.000984	-3.7	-0.744262	-0.673	ZNF415	zinc finger protein 415
225321_s_at	0.0291768	0.000984	-3.7	-0.744609	-0.85	MIR6840///STAG3L5P-PVRIG2P-PILRB///PILRB	microRNA 6840///STAG3L5P-PVRIG2P-PILRB readthrough///paired immunoglobin-like type 2 receptor beta
208649_s_at	0.0291768	0.000985	3.7	-0.744891	0.46	VCP	valosin containing protein
42361_g_at	0.0292619	0.000988	-3.7	-0.748064	-0.467	CCHCR1	coiled-coil alpha-helical rod protein 1
226434_at	0.0292855	0.000991	-3.7	-0.750609	-0.357	PPP1R35	protein phosphatase 1 regulatory subunit 35
212508_at	0.0292855	0.000991	-3.7	-0.751158	-0.468	MOAP1	modulator of apoptosis 1
212870_at	0.0292855	0.000992	-3.7	-0.751682	-0.505	SOS2	SOS Ras/Rho guanine nucleotide exchange factor 2
241756_at	0.0292855	0.000992	-3.7	-0.751915	-0.386
32723_at	0.0292855	0.000992	-3.7	-0.75214	-0.376	CSTF1	cleavage stimulation factor subunit 1
206471_s_at	0.0292855	0.000992	3.7	-0.752223	0.764	PLXNC1	plexin C1
225304_s_at	0.0292855	0.000993	3.7	-0.752278	0.309	NDUFA11	NADH:ubiquinone oxidoreductase subunit A11
226721_at	0.0292917	0.000993	-3.7	-0.752968	-0.506	DPY19L4	dpy-19 like 4 (C. elegans)
1555736_a_at	0.0293194	0.000995	3.7	-0.754331	0.794	AGTRAP	angiotensin II receptor associated protein
222670_s_at	0.0293339	0.000996	3.7	-0.755869	0.908	MAFB	MAF bZIP transcription factor B
212812_at	0.0293339	0.000997	-3.7	-0.756173	-0.745	SERINC5	serine incorporator 5
230088_at	0.0293339	0.000997	-3.7	-0.756437	-0.466	EPHB2	EPH receptor B2
212737_at	0.0293339	0.000998	3.7	-0.757378	0.828	GM2A	GM2 ganglioside activator
222163_s_at	0.0293339	0.000998	-3.7	-0.757623	-0.589	SPATA5L1	spermatogenesis associated 5 like 1
200755_s_at	0.0293339	0.000998	3.7	-0.757749	0.934	CALU	calumenin
205017_s_at	0.0293553	0.001	3.7	-0.758913	0.555	MBNL2	muscleblind like splicing regulator 2
239923_at	0.0293716	0.001	3.7	-0.759915	0.652
238924_at	0.0293876	0.001	3.7	-0.761182	0.264	BMS1P5	BMS1, ribosome biogenesis factor pseudogene 5
222720_x_at	0.0293876	0.001	-3.7	-0.761402	-0.365	C1orf27	chromosome 1 open reading frame 27
205964_at	0.0294186	0.001	-3.7	-0.7631	-0.538	ZNF426	zinc finger protein 426
200941_at	0.0294186	0.001	-3.7	-0.763354	-0.305	HSBP1	heat shock factor binding protein 1
235754_at	0.0294936	0.00101	3.69	-0.766181	0.354	HFE	hemochromatosis
212778_at	0.0295333	0.00101	-3.69	-0.767908	-0.401	PACS2	phosphofurin acidic cluster sorting protein 2
230343_at	0.0295633	0.00101	-3.69	-0.769331	-0.541	CST3	cystatin C
208490_x_at	0.029579	0.00101	3.69	-0.770311	0.58	HIST1H2BC///HIST1H2BI///HIST1H2BE///HIST1H2BF///HIST1H2BG	histone cluster 1, H2bc///histone cluster 1, H2bi///histone cluster 1, H2be///histone cluster 1, H2bf///histone cluster 1, H2bg
218046_s_at	0.0295988	0.00101	3.69	-0.771736	0.397	MRPS16	mitochondrial ribosomal protein S16
242414_at	0.0295988	0.00101	-3.69	-0.771907	-0.736	QPRT	quinolinate phosphoribosyltransferase
219526_at	0.0296152	0.00102	-3.69	-0.772904	-0.453	C14orf169	chromosome 14 open reading frame 169
218540_at	0.0296235	0.00102	-3.69	-0.774105	-0.329	THTPA	thiamine triphosphatase
242337_at	0.0296235	0.00102	3.69	-0.774299	0.481
212446_s_at	0.0296235	0.00102	-3.69	-0.774926	-0.75	CERS6	ceramide synthase 6
201894_s_at	0.0296235	0.00102	3.69	-0.7754	0.549	SSR1	signal sequence receptor subunit 1
217167_x_at	0.0296235	0.00102	3.69	-0.775607	0.622	GK	glycerol kinase
220661_s_at	0.0296627	0.00102	-3.69	-0.777389	-0.568	ZNF692	zinc finger protein 692
227620_at	0.0296627	0.00102	-3.69	-0.778721	-0.905	SLC44A1	solute carrier family 44 member 1
237379_at	0.0296627	0.00102	3.69	-0.778749	0.201	PHRF1	PHD and ring finger domains 1
218787_x_at	0.0296627	0.00102	3.69	-0.778929	0.334	CWF19L1	CWF19-like 1, cell cycle control (S. pombe)
216541_x_at	0.0296627	0.00102	3.69	-0.7793	2.5	IGHM///IGHG1	immunoglobulin heavy constant mu///immunoglobulin heavy constant gamma 1 (G1m marker)
223068_at	0.0296627	0.00102	-3.69	-0.77975	-0.343	EML4	echinoderm microtubule associated protein like 4
1554747_a_at	0.0296772	0.00102	3.69	-0.780928	0.437	2019-09-02	septin 2
227981_at	0.0296772	0.00102	-3.69	-0.781357	-0.281	CYB561D1	cytochrome b561 family member D1
203773_x_at	0.0296772	0.00103	3.69	-0.782074	1.26	BLVRA	biliverdin reductase A
211356_x_at	0.0296772	0.00103	3.69	-0.78247	0.458	LEPROT///LEPR	leptin receptor overlapping transcript///leptin receptor
238759_at	0.0296772	0.00103	3.69	-0.78263	0.221	CCDC88A	coiled-coil domain containing 88A
211012_s_at	0.0296887	0.00103	3.69	-0.784179	0.544	PML	promyelocytic leukemia
222386_s_at	0.0296887	0.00103	3.69	-0.784337	0.292	COPZ1	coatomer protein complex subunit zeta 1
238808_at	0.0296887	0.00103	-3.69	-0.784441	-0.778	HOXA13	homeobox A13
AFFX-BioB-5_at	0.0299001	0.00104	-3.68	-0.791675	-0.447
211810_s_at	0.0299001	0.00104	3.68	-0.791923	0.476	GALC	galactosylceramidase
214039_s_at	0.0299486	0.00104	-3.68	-0.793896	-0.678	LAPTM4B	lysosomal protein transmembrane 4 beta
202960_s_at	0.0299776	0.00104	-3.68	-0.79527	-0.53	MUT	methylmalonyl-CoA mutase
1555812_a_at	0.0300985	0.00104	3.68	-0.799447	1.57	ARHGDIB	Rho GDP dissociation inhibitor beta
200008_s_at	0.0301269	0.00105	3.68	-0.800798	0.456	GDI2	GDP dissociation inhibitor 2
202220_at	0.0301342	0.00105	-3.68	-0.801502	-0.451	KIAA0907	KIAA0907
203764_at	0.030214	0.00105	3.68	-0.804427	0.976	DLGAP5	DLG associated protein 5
208774_at	0.030214	0.00105	-3.68	-0.804895	-0.394	CSNK1D	casein kinase 1 delta
219634_at	0.0302174	0.00105	3.68	-0.805481	0.815	CHST11	carbohydrate (chondroitin 4) sulfotransferase 11
232882_at	0.0302205	0.00105	3.68	-0.806324	0.806
209642_at	0.0302205	0.00105	3.68	-0.806794	1.13	BUB1	BUB1 mitotic checkpoint serine/threonine kinase
204129_at	0.0302205	0.00105	-3.68	-0.807053	-0.254	BCL9	B-cell CLL/lymphoma 9
221423_s_at	0.0302205	0.00105	3.68	-0.807502	0.591	YIPF5	Yip1 domain family member 5
212182_at	0.03025	0.00106	-3.68	-0.808881	-0.297	NUDT4	nudix hydrolase 4
202374_s_at	0.0302571	0.00106	3.68	-0.809575	0.369	RAB3GAP2///AURKAPS1	RAB3 GTPase activating non-catalytic protein subunit 2///aurora kinase A pseudogene 1
218476_at	0.0302748	0.00106	-3.68	-0.811183	-0.447	POMT1	protein O-mannosyltransferase 1
230129_at	0.0302748	0.00106	-3.68	-0.811432	-0.336	PSTK	phosphoseryl-tRNA kinase
1557505_a_at	0.0302748	0.00106	3.68	-0.811906	0.624
222528_s_at	0.0302748	0.00106	3.67	-0.812696	0.865	SLC25A37	solute carrier family 25 member 37
205446_s_at	0.0302748	0.00106	3.67	-0.813247	0.578	ATF2	activating transcription factor 2
219052_at	0.0302748	0.00106	-3.67	-0.813435	-0.308	HPS6	HPS6, biogenesis of lysosomal organelles complex 2 subunit 3
201773_at	0.0302748	0.00106	-3.67	-0.81386	-0.342	ADNP	activity dependent neuroprotector homeobox
222937_s_at	0.0302748	0.00106	-3.67	-0.813952	-0.688	MMP28	matrix metallopeptidase 28
211863_x_at	0.0303866	0.00107	3.67	-0.817813	0.312	HFE	hemochromatosis
226533_at	0.0303934	0.00107	-3.67	-0.818579	-0.491	HINT3	histidine triad nucleotide binding protein 3
208872_s_at	0.0303934	0.00107	3.67	-0.818975	0.467	REEP5	receptor accessory protein 5
206106_at	0.0304356	0.00107	3.67	-0.820726	0.361	MAPK12	mitogen-activated protein kinase 12
207677_s_at	0.0304675	0.00107	3.67	-0.822164	1.29	NCF4	neutrophil cytosolic factor 4
200090_at	0.0304967	0.00107	-3.67	-0.823522	-0.252	FNTA	farnesyltransferase, CAAX box, alpha
215787_at	0.0306021	0.00108	3.67	-0.827164	0.268	ACTA2	actin, alpha 2, smooth muscle, aorta
222270_at	0.0306175	0.00108	-3.67	-0.828105	-0.515	PPP4R3B	protein phosphatase 4 regulatory subunit 3B
243209_at	0.0306243	0.00108	-3.67	-0.828785	-0.461	KCNQ4	potassium voltage-gated channel subfamily Q member 4
224031_at	0.0306456	0.00108	-3.67	-0.830364	-0.32
212473_s_at	0.0306456	0.00108	-3.67	-0.830374	-0.515	MICAL2	microtubule associated monooxygenase, calponin and LIM domain containing 2
220525_s_at	0.0306714	0.00108	-3.67	-0.831623	-0.38	AUP1	ancient ubiquitous protein 1
235173_at	0.0307143	0.00108	-3.67	-0.833381	-0.659	MBNL1-AS1	MBNL1 antisense RNA 1
214992_s_at	0.0307423	0.00109	3.67	-0.834692	0.612	DNASE2	deoxyribonuclease 2, lysosomal
201956_s_at	0.0308269	0.00109	-3.66	-0.838068	-0.273	GNPAT	glyceronephosphate O-acyltransferase
235505_s_at	0.0308269	0.00109	-3.66	-0.838164	-0.532	LRPAP1	LDL receptor related protein associated protein 1
213459_at	0.0308269	0.00109	-3.66	-0.838639	-0.71	RPL37A	ribosomal protein L37a
203460_s_at	0.030895	0.00109	-3.66	-0.841137	-0.54	PSEN1	presenilin 1
212183_at	0.0309466	0.0011	-3.66	-0.843144	-0.566	NUDT4P1///NUDT4	nudix hydrolase 4 pseudogene 1///nudix hydrolase 4
239161_at	0.0309807	0.0011	-3.66	-0.844932	-0.715	FDX1	ferredoxin 1
223092_at	0.0309807	0.0011	-3.66	-0.845264	-0.864	ANKH	ANKH inorganic pyrophosphate transport regulator
229909_at	0.0309807	0.0011	-3.66	-0.845575	-0.582	B4GALNT3	beta-1,4-N-acetyl-galactosaminyltransferase 3
229341_at	0.0310216	0.0011	-3.66	-0.847258	-0.721	TFCP2L1	transcription factor CP2-like 1
201721_s_at	0.0310268	0.0011	3.66	-0.847884	1.39	LAPTM5	lysosomal protein transmembrane 5
239178_at	0.031032	0.0011	-3.66	-0.848835	-0.223	FGF9	fibroblast growth factor 9
212590_at	0.031032	0.0011	-3.66	-0.848985	-0.773	RRAS2	related RAS viral (r-ras) oncogene homolog 2
228925_at	0.0310558	0.0011	-3.66	-0.850159	-0.995
225733_at	0.0310967	0.00111	-3.66	-0.851839	-0.561	B3GALT6	beta-1,3-galactosyltransferase 6
243011_at	0.0311517	0.00111	3.66	-0.853932	0.498	NXPE3	neurexophilin and PC-esterase domain family member 3
203305_at	0.031221	0.00111	3.66	-0.856443	1.54	F13A1	coagulation factor XIII A chain
237461_at	0.0312386	0.00111	3.66	-0.857684	0.529	NLRP7	NLR family pyrin domain containing 7
218505_at	0.0312386	0.00111	-3.66	-0.857903	-0.352	WDR59	WD repeat domain 59
222983_s_at	0.0312393	0.00111	3.66	-0.858392	0.464	PAIP2	poly(A) binding protein interacting protein 2
39966_at	0.031263	0.00112	-3.66	-0.859624	-0.256	CSPG5	chondroitin sulfate proteoglycan 5
242618_at	0.031263	0.00112	-3.66	-0.86003	-0.398	HCG18	HLA complex group 18 (non-protein coding)
223080_at	0.0312824	0.00112	3.65	-0.861836	0.344	GLS	glutaminase
203028_s_at	0.0312824	0.00112	3.65	-0.861839	0.62	CYBA	cytochrome b-245 alpha chain
1555845_at	0.0312824	0.00112	-3.65	-0.862528	-0.38
1552798_a_at	0.0312824	0.00112	3.65	-0.862608	0.471	TLR4	toll like receptor 4
227882_at	0.0312824	0.00112	-3.65	-0.862945	-0.428	FKRP	fukutin related protein
212974_at	0.0313644	0.00112	3.65	-0.865817	0.609	DENND3	DENN domain containing 3
1558628_at	0.0313708	0.00112	-3.65	-0.866723	-0.228	RBFADN	RBFA downstream neighbor (non-protein coding)
221522_at	0.0313708	0.00112	-3.65	-0.86694	-0.49	ANKRD27	ankyrin repeat domain 27
242931_at	0.0314212	0.00113	-3.65	-0.868879	-0.96
226038_at	0.0315504	0.00113	-3.65	-0.873222	-0.538	LONRF1	LON peptidase N-terminal domain and ring finger 1
217929_s_at	0.0315504	0.00113	-3.65	-0.874279	-0.299	KIAA0319L	KIAA0319 like
206188_at	0.0315504	0.00113	-3.65	-0.874831	-0.346	ZNF623	zinc finger protein 623
AFFX-r2-Ec-bioB-3_at	0.0315504	0.00113	-3.65	-0.875187	-0.386
1559351_at	0.0315504	0.00113	-3.65	-0.875216	-0.663
223717_s_at	0.0315504	0.00114	-3.65	-0.875448	-0.375	ACRBP	acrosin binding protein
210208_x_at	0.0316256	0.00114	-3.65	-0.879049	-0.31	BAG6	BCL2 associated athanogene 6
226403_at	0.0316256	0.00114	-3.65	-0.879204	-0.872	TMC4	transmembrane channel like 4
209131_s_at	0.0316256	0.00114	3.65	-0.879229	0.647	SNAP23	synaptosome associated protein 23
204335_at	0.0316256	0.00114	-3.65	-0.879495	-0.281	CCDC94	coiled-coil domain containing 94
201190_s_at	0.0316378	0.00114	-3.65	-0.880313	-0.413	PITPNA	phosphatidylinositol transfer protein alpha
210587_at	0.0316464	0.00114	-3.65	-0.881165	-0.17	INHBE	inhibin beta E subunit
229238_at	0.0316464	0.00114	-3.65	-0.881605	-0.88	C17orf97	chromosome 17 open reading frame 97
227946_at	0.0316464	0.00114	-3.65	-0.881958	-0.51	OSBPL7	oxysterol binding protein like 7
222443_s_at	0.0316545	0.00114	3.65	-0.882658	0.351	RBM8A	RNA binding motif protein 8A
212351_at	0.0316867	0.00115	-3.64	-0.884362	-0.322	EIF2B5	eukaryotic translation initiation factor 2B subunit epsilon
219909_at	0.0316867	0.00115	-3.64	-0.884518	-1.26	MMP28	matrix metallopeptidase 28
225650_at	0.0316897	0.00115	-3.64	-0.885236	-0.41	SAMD1	sterile alpha motif domain containing 1
218606_at	0.0316897	0.00115	-3.64	-0.885907	-0.354	ZDHHC7	zinc finger DHHC-type containing 7
214766_s_at	0.0316897	0.00115	-3.64	-0.886595	-0.369	AHCTF1	AT-hook containing transcription factor 1
230421_at	0.0316897	0.00115	-3.64	-0.886842	-0.327	ZNF879	zinc finger protein 879
212788_x_at	0.0316897	0.00115	3.64	-0.886921	0.281	FTL	ferritin light chain
210111_s_at	0.0317018	0.00115	-3.64	-0.887734	-0.385	KLHDC10	kelch domain containing 10
211609_x_at	0.0317091	0.00115	3.64	-0.889369	0.235	PSMD4	proteasome 26S subunit, non-ATPase 4
217819_at	0.0317091	0.00115	-3.64	-0.889857	-0.256	GOLGA7	golgin A7
211952_at	0.0317091	0.00115	-3.64	-0.8903	-0.475	IPO5	importin 5
202915_s_at	0.0317091	0.00115	-3.64	-0.89054	-0.441	FAM20B	family with sequence similarity 20 member B
203335_at	0.0317091	0.00115	-3.64	-0.89094	-1.03	PHYH	phytanoyl-CoA 2-hydroxylase
204022_at	0.0317091	0.00115	-3.64	-0.891136	-0.351	WWP2	WW domain containing E3 ubiquitin protein ligase 2
229529_at	0.0317091	0.00115	3.64	-0.891176	0.755	TCF21	transcription factor 21
226630_at	0.031737	0.00116	3.64	-0.892444	0.607	MIS18BP1	MIS18 binding protein 1
225192_at	0.0318482	0.00116	-3.64	-0.896112	-0.331	CACUL1	CDK2 associated cullin domain 1
201445_at	0.031878	0.00116	3.64	-0.897428	0.664	CNN3	calponin 3
221479_s_at	0.0319213	0.00116	3.64	-0.899268	0.827	BNIP3L	BCL2 interacting protein 3 like
232596_at	0.0319213	0.00117	3.64	-0.899596	0.28	DIAPH3	diaphanous related formin 3
203421_at	0.0319766	0.00117	-3.64	-0.90164	-0.31	TP53I11	tumor protein p53 inducible protein 11
212246_at	0.0319938	0.00117	3.64	-0.902919	0.85	MCFD2	multiple coagulation factor deficiency 2
229173_at	0.0319938	0.00117	-3.64	-0.903569	-0.621	LNPK	lunapark, ER junction formation factor
[truncated: 46,750 more rows]

## Sheet: GSE8671
ID	adj.P.Val	P.Value	t	B	logFC	Gene.symbol	Gene.title
222696_at	9.88e-35	1.81e-39	29.998	79.0219	2.58951	AXIN2	axin 2
203256_at	2.81e-31	1.03e-35	25.9301	70.7356	6.37212	CDH3	cadherin 3
212014_x_at	8.61e-31	5.56e-35	25.1931	69.1056	2.14256	CD44	CD44 molecule (Indian blood group)
209835_x_at	8.61e-31	6.3e-35	25.1391	68.9844	2.05945	CD44	CD44 molecule (Indian blood group)
212942_s_at	1.03e-30	9.4e-35	24.9671	68.5972	6.01332	CEMIP	cell migration inducing hyaluronan binding protein
201563_at	2.07e-30	2.27e-34	24.591	67.7417	1.98091	SORD	sorbitol dehydrogenase
206134_at	3.54e-30	4.54e-34	-24.2999	67.0717	-3.77579	ADAMDEC1	ADAM like decysin 1
224176_s_at	8.55e-30	1.25e-33	23.8777	66.0872	2.73269	AXIN2	axin 2
204036_at	2.06e-29	3.39e-33	-23.469	65.1196	-2.27463	LPAR1	lysophosphatidic acid receptor 1
218412_s_at	9.11e-29	1.67e-32	22.8263	63.5681	1.69538	GTF2IRD1	GTF2I repeat domain containing 1
204490_s_at	1.19e-28	2.39e-32	22.6827	63.2163	1.87672	CD44	CD44 molecule (Indian blood group)
227354_at	1.21e-28	2.66e-32	-22.64	63.1114	-2.3175	PAG1	phosphoprotein membrane anchor with glycosphingolipid microdomains 1
209735_at	4.05e-28	9.62e-32	-22.1356	61.8587	-4.4307	ABCG2	ATP binding cassette subfamily G member 2 (Junior blood group)
225622_at	6.54e-28	1.67e-31	-21.9206	61.3176	-2.09166	PAG1	phosphoprotein membrane anchor with glycosphingolipid microdomains 1
200845_s_at	1.06e-27	2.9e-31	-21.7088	60.7803	-1.55755	PRDX6	peroxiredoxin 6
223018_at	1.19e-27	3.49e-31	21.6384	60.6007	1.351	NOB1	NIN1/PSMD8 binding protein 1 homolog
219956_at	1.29e-27	4.01e-31	21.5855	60.4653	2.4894	GALNT6	polypeptide N-acetylgalactosaminyltransferase 6
213407_at	1.58e-27	5.19e-31	-21.4865	60.2114	-2.63921	PHLPP2	PH domain and leucine rich repeat protein phosphatase 2
240157_at	1.74e-27	6.04e-31	-21.4291	60.064	-5.67088
227475_at	2.29e-27	8.38e-31	21.305	59.7437	4.56058	FOXQ1	forkhead box Q1
204719_at	3.37e-27	1.29e-30	-21.1408	59.3174	-4.86893	ABCA8	ATP binding cassette subfamily A member 8
208383_s_at	5.04e-27	2.03e-30	-20.9723	58.8773	-4.29393	PCK1	phosphoenolpyruvate carboxykinase 1
209369_at	6.61e-27	2.78e-30	20.855	58.5694	1.82854	ANXA3	annexin A3
225275_at	9.29e-27	4.08e-30	-20.713	58.1945	-2.50013	EDIL3	EGF like repeats and discoidin domains 3
218218_at	1.18e-26	5.42e-30	-20.6078	57.9156	-1.59664	APPL2	adaptor protein, phosphotyrosine interacting with PH domain and leucine zipper 2
202242_at	1.49e-26	7.1e-30	-20.5083	57.6508	-2.59791	TSPAN7	tetraspanin 7
218704_at	1.62e-26	7.99e-30	20.4647	57.5341	1.93518	RNF43	ring finger protein 43
202555_s_at	2.9e-26	1.54e-29	-20.2262	56.8939	-2.43132	MYLK	myosin light chain kinase
224823_at	2.9e-26	1.54e-29	-20.226	56.8935	-2.2478	MYLK	myosin light chain kinase
204489_s_at	5.87e-26	3.22e-29	19.9578	56.1666	2.00015	CD44	CD44 molecule (Indian blood group)
1554522_at	6.19e-26	3.51e-29	-19.927	56.0824	-2.25052	CNNM2	cyclin and CBS domain divalent metal cation transport mediator 2
228707_at	1.02e-25	5.96e-29	-19.7369	55.562	-3.05367	CLDN23	claudin 23
228195_at	1.1e-25	6.62e-29	-19.6997	55.4598	-2.6744	C2orf88	chromosome 2 open reading frame 88
211253_x_at	1.18e-25	7.35e-29	-19.6625	55.3573	-5.1181	PYY	peptide YY
226430_at	1.54e-25	9.88e-29	-19.5569	55.0656	-1.68435	RELL1	RELT like 1
223754_at	1.77e-25	1.17e-28	-19.4982	54.9029	-2.47783	C2orf88	chromosome 2 open reading frame 88
235146_at	2.3e-25	1.55e-28	-19.3967	54.6208	-2.05468	TMCC3	transmembrane and coiled-coil domain family 3
221748_s_at	2.34e-25	1.62e-28	-19.3815	54.5783	-2.25309	TNS1	tensin 1
219563_at	2.63e-25	1.87e-28	-19.3307	54.4365	-2.44052	SYNE3///LINC00341	spectrin repeat containing nuclear envelope family member 3///long intergenic non-protein coding RNA 341
224903_at	2.63e-25	1.93e-28	19.3211	54.4099	1.25388	UTP4	UTP4, small subunit processome component
211494_s_at	3.05e-25	2.31e-28	-19.258	54.2333	-3.25177	SLC4A4	solute carrier family 4 member 4
201562_s_at	3.05e-25	2.34e-28	19.2527	54.2184	1.81434	SORD	sorbitol dehydrogenase
225626_at	3.64e-25	2.87e-28	-19.1816	54.0191	-2.29664	PAG1	phosphoprotein membrane anchor with glycosphingolipid microdomains 1
207051_at	3.9e-25	3.14e-28	-19.15	53.9301	-2.84585	SLC17A4	solute carrier family 17 member 4
205480_s_at	3.92e-25	3.22e-28	-19.1405	53.9035	-1.13323	UGP2	UDP-glucose pyrophosphorylase 2
205513_at	4.1e-25	3.45e-28	19.1164	53.8358	6.61643	TCN1	transcobalamin 1
212063_at	5.87e-25	5.11e-28	18.9802	53.4511	1.36309	CD44	CD44 molecule (Indian blood group)
226039_at	5.87e-25	5.15e-28	-18.9771	53.4423	-1.80374	MGAT4A	mannosyl (alpha-1,3-)-glycoprotein beta-1,4-N-acetylglucosaminyltransferase, isozyme A
208399_s_at	6.7e-25	6e-28	-18.9241	53.2922	-3.67638	EDN3	endothelin 3
203313_s_at	8.16e-25	7.46e-28	18.8486	53.0777	1.2595	TGIF1	TGFB induced factor homeobox 1
218557_at	8.76e-25	8.17e-28	18.8172	52.9883	1.06804	NIT2	nitrilase family member 2
201341_at	1.03e-24	9.76e-28	18.7558	52.813	1.58942	ENC1	ectodermal-neural cortex 1
204259_at	1.04e-24	1.02e-27	18.7397	52.7672	5.62794	MMP7	matrix metallopeptidase 7
202431_s_at	1.04e-24	1.03e-27	18.7389	52.7648	1.63667	MYC	v-myc avian myelocytomatosis viral oncogene homolog
205240_at	1.1e-24	1.11e-27	18.7129	52.6903	2.06128	GPSM2	G-protein signaling modulator 2
202804_at	1.35e-24	1.38e-27	18.6364	52.4713	1.38	ABCC1	ATP binding cassette subfamily C member 1
230204_at	1.4e-24	1.46e-27	-18.6177	52.4175	-2.58555	HAPLN1	hyaluronan and proteoglycan link protein 1
203510_at	1.74e-24	1.84e-27	18.5376	52.1872	1.77313	MET	MET proto-oncogene, receptor tyrosine kinase
204341_at	1.93e-24	2.08e-27	18.4965	52.0687	1.50857	TRIM16	tripartite motif containing 16
228365_at	2.15e-24	2.36e-27	-18.4531	51.9432	-2.67782	CPNE8	copine 8
202246_s_at	2.21e-24	2.49e-27	18.4347	51.8902	1.17333	CDK4	cyclin dependent kinase 4
221923_s_at	2.21e-24	2.5e-27	18.4332	51.8856	1.23225	NPM1	nucleophosmin
204404_at	2.27e-24	2.62e-27	18.4182	51.8424	1.93562	SLC12A2	solute carrier family 12 member 2
210739_x_at	2.33e-24	2.72e-27	-18.4046	51.8031	-2.99995	SLC4A4	solute carrier family 4 member 4
213716_s_at	2.61e-24	3.1e-27	-18.3602	51.6743	-2.39506	SECTM1	secreted and transmembrane 1
1557905_s_at	2.63e-24	3.17e-27	18.3527	51.6525	1.87966	CD44	CD44 molecule (Indian blood group)
214601_at	2.79e-24	3.42e-27	-18.3274	51.5791	-5.9473	TPH1	tryptophan hydroxylase 1
205945_at	2.91e-24	3.62e-27	-18.3076	51.5216	-2.29346	IL6R	interleukin 6 receptor
218622_at	3.99e-24	5.04e-27	18.1962	51.1969	1.09486	NUP37	nucleoporin 37
200750_s_at	4.06e-24	5.19e-27	18.1859	51.1668	1.00333	RAN	RAN, member RAS oncogene family
212482_at	4.25e-24	5.52e-27	-18.1651	51.106	-1.24166	RMND5A	required for meiotic nuclear division 5 homolog A
224836_at	4.27e-24	5.62e-27	-18.159	51.0882	-2.53024	TP53INP2	tumor protein p53 inducible nuclear protein 2
204702_s_at	4.58e-24	6.15e-27	18.129	51.0006	2.01096	NFE2L3	nuclear factor, erythroid 2 like 3
203908_at	4.58e-24	6.2e-27	-18.1263	50.9925	-3.4639	SLC4A4	solute carrier family 4 member 4
204069_at	5.85e-24	8.02e-27	-18.0395	50.738	-2.58944	MEIS1	Meis homeobox 1
230656_s_at	7.04e-24	9.79e-27	17.9728	50.5417	1.24905	UTP4	UTP4, small subunit processome component
206784_at	7.6e-24	1.07e-26	-17.943	50.4538	-6.49919	AQP8	aquaporin 8
227826_s_at	8.22e-24	1.17e-26	-17.9122	50.363	-3.40458	SORBS2	sorbin and SH3 domain containing 2
224412_s_at	8.51e-24	1.23e-26	-17.8964	50.3164	-5.13035	TRPM6	transient receptor potential cation channel subfamily M member 6
210916_s_at	9.6e-24	1.4e-26	17.8523	50.1858	1.66055	CD44	CD44 molecule (Indian blood group)
1553559_at	1.26e-23	1.87e-26	-17.7577	49.9054	-2.35842	TMEM171	transmembrane protein 171
218756_s_at	1.26e-23	1.9e-26	-17.7524	49.8896	-2.4114	DHRS11	dehydrogenase/reductase 11
213071_at	1.34e-23	2.03e-26	-17.7294	49.8213	-3.64525	DPT	dermatopontin
212378_at	1.49e-23	2.29e-26	17.6904	49.7051	1.34357	GART	phosphoribosylglycinamide formyltransferase, phosphoribosylglycinamide synthetase, phosphoribosylaminoimidazole synthetase
221922_at	1.63e-23	2.54e-26	17.6553	49.6004	1.6883	GPSM2	G-protein signaling modulator 2
207502_at	1.64e-23	2.59e-26	-17.6489	49.5814	-7.29814	GUCA2B	guanylate cyclase activator 2B
201348_at	1.64e-23	2.61e-26	-17.647	49.5759	-2.06766	GPX3	glutathione peroxidase 3
228885_at	1.85e-23	2.98e-26	-17.603	49.4442	-3.55153	MAMDC2	MAM domain containing 2
225544_at	1.97e-23	3.21e-26	17.5785	49.3709	1.88244	TBX3	T-box 3
209147_s_at	1.97e-23	3.25e-26	-17.5742	49.3583	-1.41387	PLPP1	phospholipid phosphatase 1
230788_at	2.11e-23	3.52e-26	-17.548	49.2798	-4.74266	GCNT2	glucosaminyl (N-acetyl) transferase 2, I-branching enzyme (I blood group)
209104_s_at	2.47e-23	4.16e-26	17.4925	49.1131	1.07389	NHP2	NHP2 ribonucleoprotein
202920_at	2.56e-23	4.35e-26	-17.4779	49.0694	-3.44956	ANK2	ankyrin 2, neuronal
207504_at	2.6e-23	4.48e-26	-17.4686	49.0415	-4.15249	CA7	carbonic anhydrase 7
216321_s_at	2.73e-23	4.74e-26	-17.4498	48.9848	-2.44457	NR3C1	nuclear receptor subfamily 3 group C member 1
207080_s_at	2.73e-23	4.79e-26	-17.4466	48.9754	-6.89738	PYY	peptide YY
213317_at	3.16e-23	5.6e-26	-17.395	48.82	-1.89069	CLIC5	chloride intracellular channel 5
204497_at	3.48e-23	6.29e-26	-17.3572	48.7058	-1.33057	ADCY9	adenylate cyclase 9
210738_s_at	3.48e-23	6.3e-26	-17.3567	48.7043	-3.63479	SLC4A4	solute carrier family 4 member 4
201623_s_at	3.58e-23	6.55e-26	17.3439	48.6658	1.06933	DARS	aspartyl-tRNA synthetase
214091_s_at	3.68e-23	6.81e-26	-17.3314	48.628	-1.78385	GPX3	glutathione peroxidase 3
201420_s_at	3.69e-23	6.88e-26	17.3279	48.6174	1.42686	WDR77	WD repeat domain 77
207003_at	3.85e-23	7.26e-26	-17.3103	48.5641	-6.19958	GUCA2A	guanylate cyclase activator 2A
212741_at	4.39e-23	8.36e-26	-17.2644	48.4251	-1.47033	MAOA	monoamine oxidase A
209568_s_at	5.22e-23	1e-25	-17.2054	48.2464	-1.42183	RGL1	ral guanine nucleotide dissociation stimulator like 1
221652_s_at	6.07e-23	1.18e-25	17.153	48.0869	1.15936	ASUN	asunder, spermatogenesis regulator
231283_at	6.44e-23	1.26e-25	-17.1307	48.019	-1.95044	MGAT4A	mannosyl (alpha-1,3-)-glycoprotein beta-1,4-N-acetylglucosaminyltransferase, isozyme A
201892_s_at	7.49e-23	1.48e-25	17.0789	47.8611	1.01124	IMPDH2	inosine monophosphate dehydrogenase 2
232370_at	7.49e-23	1.49e-25	17.0761	47.8524	4.44245
200660_at	7.93e-23	1.59e-25	17.0547	47.7872	2.00574	S100A11	S100 calcium binding protein A11
225520_at	8.33e-23	1.69e-25	17.0357	47.7291	1.93754	LOC101928195///LOC100996643///MTHFD1L	methylenetetrahydrofolate dehydrogenase (NADP+ dependent) 1-like pseudogene///monofunctional C1-tetrahydrofolate synthase, mitochondrial-like///methylenetetrahydrofolate dehydrogenase (NADP+ dependent) 1-like
210198_s_at	9.34e-23	1.91e-25	-16.9959	47.6072	-4.08725	PLP1	proteolipid protein 1
201947_s_at	1.08e-22	2.22e-25	16.9473	47.4583	0.901249	CCT2	chaperonin containing TCP1 subunit 2
236313_at	1.09e-22	2.27e-25	-16.9406	47.4378	-4.47678	CDKN2B	cyclin dependent kinase inhibitor 2B
201391_at	1.16e-22	2.44e-25	16.9177	47.3676	1.44282	TRAP1	TNF receptor associated protein 1
222549_at	1.27e-22	2.69e-25	16.8859	47.2698	2.96714	CLDN1	claudin 1
200844_s_at	1.31e-22	2.79e-25	-16.8738	47.2326	-1.25409	PRDX6	peroxiredoxin 6
201112_s_at	1.4e-22	3.02e-25	16.8487	47.1552	1.2165	CSE1L	chromosome segregation 1 like
564_at	1.41e-22	3.07e-25	-16.8438	47.1403	-1.21595	GNA11	G protein subunit alpha 11
219787_s_at	1.46e-22	3.22e-25	16.8289	47.0942	1.62874	ECT2	epithelial cell transforming 2
217848_s_at	1.62e-22	3.58e-25	16.7948	46.989	1.21745	PPA1	pyrophosphatase (inorganic) 1
205697_at	1.64e-22	3.66e-25	-16.787	46.965	-4.24555	SCGN	secretagogin, EF-hand calcium binding protein
242317_at	1.66e-22	3.75e-25	-16.78	46.9432	-1.8767	HIGD1A	HIG1 hypoxia inducible domain family member 1A
231626_at	1.72e-22	3.9e-25	-16.7667	46.9023	-5.3392	TPH1	tryptophan hydroxylase 1
202421_at	1.81e-22	4.14e-25	-16.748	46.8444	-1.30432	IGSF3	immunoglobulin superfamily member 3
241031_at	2.49e-22	5.74e-25	16.644	46.522	5.05301	C2CD4A	C2 calcium dependent domain containing 4A
222446_s_at	2.64e-22	6.13e-25	16.6228	46.4564	1.74574	BACE2	beta-site APP-cleaving enzyme 2
213921_at	2.67e-22	6.25e-25	-16.6166	46.437	-6.58686	SST	somatostatin
213139_at	2.9e-22	6.85e-25	-16.5876	46.3467	-1.99836	SNAI2	snail family transcriptional repressor 2
203320_at	2.95e-22	7.08e-25	-16.5768	46.3131	-1.19973	SH2B3	SH2B adaptor protein 3
205861_at	2.95e-22	7.09e-25	-16.5767	46.3128	-3.95966	SPIB	Spi-B transcription factor
206422_at	2.95e-22	7.13e-25	-16.5746	46.3063	-7.83961	GCG	glucagon
209667_at	3.4e-22	8.28e-25	-16.5274	46.1591	-2.03855	CES2	carboxylesterase 2
209348_s_at	3.41e-22	8.35e-25	-16.5248	46.1511	-1.76347	MAF	MAF bZIP transcription factor
208683_at	3.6e-22	8.89e-25	-16.5049	46.0889	-0.896011	CAPN2	calpain 2
210766_s_at	3.97e-22	9.88e-25	16.4713	45.9839	1.13202	CSE1L	chromosome segregation 1 like
221691_x_at	4.17e-22	1.04e-24	16.4539	45.9295	1.22144	NPM1	nucleophosmin
201718_s_at	4.48e-22	1.13e-24	16.4289	45.8513	1.57148	EPB41L2	erythrocyte membrane protein band 4.1 like 2
204389_at	4.48e-22	1.14e-24	-16.4262	45.8429	-1.37924	MAOA	monoamine oxidase A
201530_x_at	4.89e-22	1.25e-24	16.3969	45.7508	0.847423	LOC101928634///SENP3-EIF4A1///SNORD10///SNORA48///SNORA67///EIF4A1	uncharacterized LOC101928634///SENP3-EIF4A1 readthrough (NMD candidate)///small nucleolar RNA, C/D box 10///small nucleolar RNA, H/ACA box 48///small nucleolar RNA, H/ACA box 67///eukaryotic translation initiation factor 4A1
1552296_at	4.91e-22	1.27e-24	-16.3932	45.7394	-5.10923	BEST4	bestrophin 4
41037_at	5.91e-22	1.53e-24	16.3326	45.5491	1.81921	TEAD4	TEA domain transcription factor 4
238143_at	5.94e-22	1.55e-24	-16.3285	45.5361	-3.03334	LYPD8	LY6/PLAUR domain containing 8
213509_x_at	5.99e-22	1.58e-24	-16.3239	45.5215	-2.20645	CES2	carboxylesterase 2
218546_at	6.25e-22	1.66e-24	-16.3084	45.4728	-1.74745	C1orf115	chromosome 1 open reading frame 115
226177_at	6.78e-22	1.81e-24	-16.2805	45.385	-1.20646	GLTP	glycolipid transfer protein
225806_at	6.88e-22	1.85e-24	16.2738	45.3641	2.11657	AJUBA	ajuba LIM protein
200992_at	7.02e-22	1.9e-24	16.2654	45.3374	0.998586	IPO7	importin 7
220376_at	7.45e-22	2.04e-24	-16.2428	45.266	-1.67083	LRRC19	leucine rich repeat containing 19
205174_s_at	7.45e-22	2.04e-24	16.2424	45.2648	2.37751	QPCT	glutaminyl-peptide cyclotransferase
211787_s_at	7.89e-22	2.18e-24	16.2222	45.2012	0.963249	LOC101928634///SENP3-EIF4A1///SNORD10///SNORA48///SNORA67///EIF4A1	uncharacterized LOC101928634///SENP3-EIF4A1 readthrough (NMD candidate)///small nucleolar RNA, C/D box 10///small nucleolar RNA, H/ACA box 48///small nucleolar RNA, H/ACA box 67///eukaryotic translation initiation factor 4A1
223156_at	9.14e-22	2.54e-24	16.1744	45.0501	1.125	MRPS23	mitochondrial ribosomal protein S23
207530_s_at	1.03e-21	2.88e-24	-16.1351	44.9257	-3.08502	CDKN2B	cyclin dependent kinase inhibitor 2B
228504_at	1.18e-21	3.32e-24	-16.0909	44.7855	-3.91106	SCN7A	sodium voltage-gated channel alpha subunit 7
218999_at	1.18e-21	3.34e-24	-16.0892	44.7799	-2.25114	TMEM140	transmembrane protein 140
212814_at	1.19e-21	3.41e-24	-16.0827	44.7594	-1.8181	AHCYL2	adenosylhomocysteinase like 2
40562_at	1.21e-21	3.47e-24	-16.077	44.7413	-1.24665	GNA11	G protein subunit alpha 11
1564520_s_at	1.25e-21	3.62e-24	16.0635	44.6982	1.00368	PRMT5	protein arginine methyltransferase 5
202286_s_at	1.32e-21	3.83e-24	16.046	44.6426	4.19257	TACSTD2	tumor-associated calcium signal transducer 2
218512_at	1.4e-21	4.09e-24	16.0256	44.5777	1.06874	WDR12	WD repeat domain 12
226936_at	1.5e-21	4.42e-24	16.0019	44.5023	1.56705	CENPW	centromere protein W
239196_at	1.59e-21	4.72e-24	15.9812	44.4365	1.75276	ANKRD22	ankyrin repeat domain 22
204268_at	1.69e-21	5.04e-24	15.9611	44.3723	4.14367	S100A2	S100 calcium binding protein A2
202037_s_at	1.76e-21	5.28e-24	-15.9464	44.3254	-2.98386	SFRP1	secreted frizzled related protein 1
207379_at	1.89e-21	5.74e-24	-15.9204	44.2422	-2.17628	EDIL3	EGF like repeats and discoidin domains 3
210174_at	1.89e-21	5.75e-24	-15.9203	44.2422	-2.36751	NR5A2	nuclear receptor subfamily 5 group A member 2
207895_at	1.92e-21	5.85e-24	-15.9145	44.2234	-3.63312	NAALADL1	N-acetylated alpha-linked acidic dipeptidase-like 1
201506_at	2.05e-21	6.3e-24	15.892	44.1514	2.25608	TGFBI	transforming growth factor beta induced
229839_at	2.36e-21	7.3e-24	-15.8462	44.0049	-2.69509	SCARA5	scavenger receptor class A member 5
234312_s_at	2.54e-21	7.91e-24	-15.8216	43.9258	-1.12678	ACSS2	acyl-CoA synthetase short-chain family member 2
200877_at	2.54e-21	7.95e-24	15.8198	43.9203	0.82698	CCT4	chaperonin containing TCP1 subunit 4
202936_s_at	2.82e-21	8.88e-24	15.7858	43.8109	1.4081	SOX9	SRY-box 9
201327_s_at	2.9e-21	9.17e-24	15.776	43.7795	0.915467	CCT6A	chaperonin containing TCP1 subunit 6A
218124_at	2.98e-21	9.48e-24	-15.7655	43.7458	-1.16186	RETSAT	retinol saturase
201719_s_at	2.98e-21	9.54e-24	15.7637	43.7401	1.64256	EPB41L2	erythrocyte membrane protein band 4.1 like 2
200903_s_at	3.02e-21	9.75e-24	15.7571	43.7187	1.1703	AHCY	adenosylhomocysteinase
208699_x_at	3.02e-21	9.78e-24	15.7561	43.7155	1.42965	TKT	transketolase
229215_at	3.1e-21	1.01e-23	15.746	43.6829	2.868	ASCL2	achaete-scute family bHLH transcription factor 2
204388_s_at	3.12e-21	1.02e-23	-15.7428	43.6728	-1.38765	MAOA	monoamine oxidase A
226333_at	3.19e-21	1.05e-23	-15.7343	43.6455	-1.98335	IL6R	interleukin 6 receptor
200795_at	3.28e-21	1.08e-23	-15.7243	43.6131	-2.08096	SPARCL1	SPARC like 1
221019_s_at	3.32e-21	1.1e-23	-15.7189	43.5958	-2.20883	COLEC12	collectin subfamily member 12
208700_s_at	3.36e-21	1.12e-23	15.7134	43.578	1.68754	TKT	transketolase
213427_at	3.49e-21	1.17e-23	15.6997	43.534	1.56678	RPP40	ribonuclease P/MRP subunit p40
203988_s_at	3.7e-21	1.25e-23	15.6804	43.4717	1.40905	FUT8	fucosyltransferase 8
202731_at	3.7e-21	1.26e-23	-15.6782	43.4647	-1.44603	MIR4680///PDCD4	microRNA 4680///programmed cell death 4 (neoplastic transformation inhibitor)
201656_at	3.75e-21	1.29e-23	15.6711	43.4417	1.30774	ITGA6	integrin subunit alpha 6
201063_at	3.75e-21	1.29e-23	15.6706	43.44	1.24625	RCN1	reticulocalbin 1
217867_x_at	3.75e-21	1.3e-23	15.6692	43.4356	1.87495	BACE2	beta-site APP-cleaving enzyme 2
224468_s_at	3.99e-21	1.39e-23	15.649	43.3704	1.55813	SNORD88C///C19orf48	small nucleolar RNA, C/D box 88C///chromosome 19 open reading frame 48
220794_at	4.16e-21	1.46e-23	-15.6332	43.3193	-4.69165	GREM2	gremlin 2, DAN family BMP antagonist
201872_s_at	4.16e-21	1.46e-23	15.633	43.3186	1.11536	ABCE1	ATP binding cassette subfamily E member 1
215388_s_at	4.21e-21	1.49e-23	-15.6277	43.3014	-2.22729	CFHR1///CFH	complement factor H related 1///complement factor H
1568604_a_at	4.37e-21	1.56e-23	15.6137	43.2561	2.60648	CADPS	calcium dependent secretion activator
207222_at	4.37e-21	1.56e-23	-15.6121	43.2509	-1.64356	LOC100652777///PLA2G10	group 10 secretory phospholipase A2-like///phospholipase A2 group X
228706_s_at	4.37e-21	1.57e-23	-15.6116	43.2494	-3.13317	CLDN23	claudin 23
215177_s_at	4.62e-21	1.67e-23	15.5925	43.1876	1.59295	ITGA6	integrin subunit alpha 6
224721_at	4.75e-21	1.72e-23	15.5831	43.157	0.851885	WDR75	WD repeat domain 75
201577_at	4.76e-21	1.74e-23	15.5793	43.1449	1.38345	NME1	NME/NM23 nucleoside diphosphate kinase 1
203914_x_at	4.76e-21	1.74e-23	-15.5793	43.1447	-2.42556	HPGD	hydroxyprostaglandin dehydrogenase 15-(NAD)
218305_at	4.76e-21	1.75e-23	15.5773	43.1382	1.27671	IPO4	importin 4
209335_at	4.91e-21	1.81e-23	-15.5666	43.1037	-1.80831	DCN	decorin
1558143_a_at	4.95e-21	1.84e-23	-15.5626	43.0907	-1.25987	BCL2L11	BCL2 like 11
208756_at	5.03e-21	1.88e-23	15.556	43.0694	0.88727	EIF3I	eukaryotic translation initiation factor 3 subunit I
235651_at	5.08e-21	1.91e-23	-15.5515	43.0545	-1.58266	TTC22	tetratricopeptide repeat domain 22
210946_at	5.41e-21	2.04e-23	-15.5311	42.9886	-1.42119	PLPP1	phospholipid phosphatase 1
227607_at	5.44e-21	2.06e-23	15.5273	42.9763	1.14934	STAMBPL1	STAM binding protein like 1
217850_at	5.44e-21	2.07e-23	15.5257	42.971	1.07363	SNORD19B///GNL3	small nucleolar RNA, C/D box 19B///G protein nucleolar 3
223395_at	5.44e-21	2.08e-23	-15.5249	42.9682	-2.56661	ABI3BP	ABI family member 3 binding protein
204697_s_at	5.56e-21	2.13e-23	-15.517	42.9427	-5.5491	CHGA	chromogranin A
203962_s_at	5.56e-21	2.15e-23	15.5154	42.9375	1.8456	NEBL	nebulette
228143_at	5.58e-21	2.16e-23	-15.513	42.9297	-2.62293	CP	ceruloplasmin (ferroxidase)
208636_at	5.69e-21	2.22e-23	15.5053	42.9048	0.944036	ACTN1	actinin alpha 1
227193_at	5.81e-21	2.28e-23	-15.4974	42.8791	-1.42416	SLC30A4	solute carrier family 30 member 4
209550_at	6.09e-21	2.39e-23	-15.4819	42.8288	-2.36907	NDN	necdin, MAGE family member
222722_at	6.09e-21	2.41e-23	-15.4805	42.8242	-4.76207	OGN	osteoglycin
211548_s_at	6.14e-21	2.44e-23	-15.4766	42.8115	-2.49253	HPGD	hydroxyprostaglandin dehydrogenase 15-(NAD)
227606_s_at	6.24e-21	2.49e-23	15.4701	42.7903	1.07901	STAMBPL1	STAM binding protein like 1
226492_at	6.43e-21	2.57e-23	-15.4599	42.757	-2.88982	SEMA6D	semaphorin 6D
209167_at	6.56e-21	2.65e-23	-15.4515	42.7299	-3.92145	GPM6B	glycoprotein M6B
204818_at	6.56e-21	2.65e-23	-15.4509	42.7277	-2.42418	HSD17B2	hydroxysteroid 17-beta dehydrogenase 2
221004_s_at	6.81e-21	2.76e-23	-15.4381	42.686	-1.3307	ITM2C	integral membrane protein 2C
210519_s_at	6.83e-21	2.79e-23	15.4354	42.6772	1.98535	NQO1	NAD(P)H quinone dehydrogenase 1
204260_at	6.83e-21	2.8e-23	-15.4343	42.6739	-3.94586	CHGB	chromogranin B
205433_at	7.77e-21	3.2e-23	-15.394	42.5422	-4.3961	BCHE	butyrylcholinesterase
209613_s_at	8e-21	3.31e-23	-15.3837	42.5087	-4.55715	ADH1B	alcohol dehydrogenase 1B (class I), beta polypeptide
206084_at	8.08e-21	3.36e-23	-15.3792	42.4939	-3.50168	PTPRR	protein tyrosine phosphatase, receptor type R
222216_s_at	8.28e-21	3.45e-23	15.3704	42.4653	1.06451	MRPL17	mitochondrial ribosomal protein L17
226275_at	9.43e-21	3.95e-23	-15.3299	42.3329	-1.77989	MXD1	MAX dimerization protein 1
209773_s_at	9.72e-21	4.09e-23	15.3194	42.2987	2.10311	RRM2	ribonucleotide reductase regulatory subunit M2
227212_s_at	1.02e-20	4.29e-23	15.3046	42.25	1.63252	PHF19	PHD finger protein 19
203213_at	1.04e-20	4.43e-23	15.2954	42.22	1.9726	CDK1	cyclin dependent kinase 1
223623_at	1.13e-20	4.8e-23	-15.2709	42.1397	-4.23614	C2orf40	chromosome 2 open reading frame 40
201013_s_at	1.15e-20	4.91e-23	15.2637	42.1161	1.04478	PAICS	phosphoribosylaminoimidazole carboxylase; phosphoribosylaminoimidazolesuccinocarboxamide synthase
218009_s_at	1.16e-20	5e-23	15.2587	42.0996	1.88392	PRC1	protein regulator of cytokinesis 1
209668_x_at	1.16e-20	5e-23	-15.2587	42.0995	-2.17422	CES2	carboxylesterase 2
238439_at	1.21e-20	5.26e-23	15.2432	42.0488	1.59848	ANKRD22	ankyrin repeat domain 22
209540_at	1.31e-20	5.72e-23	-15.2181	41.9664	-2.09567	IGF1	insulin like growth factor 1
224964_s_at	1.33e-20	5.84e-23	-15.2119	41.9459	-1.79089	GNG2	G protein subunit gamma 2
213119_at	1.36e-20	5.98e-23	-15.2044	41.9213	-1.92391	SLC36A1	solute carrier family 36 member 1
207961_x_at	1.48e-20	6.51e-23	-15.1788	41.8369	-2.09225	MYH11	myosin heavy chain 11
222608_s_at	1.49e-20	6.62e-23	15.174	41.8214	2.00545	ANLN	anillin actin binding protein
209687_at	1.5e-20	6.65e-23	-15.1724	41.8161	-3.86332	CXCL12	C-X-C motif chemokine ligand 12
227135_at	1.52e-20	6.79e-23	-15.1663	41.7958	-1.89555	NAAA	N-acylethanolamine acid amidase
218542_at	1.53e-20	6.84e-23	15.1641	41.7888	1.98199	CEP55	centrosomal protein 55
240045_at	1.53e-20	6.89e-23	15.1619	41.7816	2.89961
206286_s_at	1.58e-20	7.12e-23	15.1521	41.7493	2.1477	TDGF1P3///TDGF1	teratocarcinoma-derived growth factor 1 pseudogene 3///teratocarcinoma-derived growth factor 1
227378_x_at	1.76e-20	8e-23	15.1168	41.6328	0.986817	METTL26	methyltransferase like 26
202364_at	1.84e-20	8.36e-23	-15.1036	41.5892	-1.57098	MXI1	MAX interactor 1, dimerization protein
203362_s_at	1.95e-20	8.93e-23	15.0838	41.5238	1.43423	MAD2L1	MAD2 mitotic arrest deficient-like 1 (yeast)
213766_x_at	2.18e-20	9.99e-23	-15.0503	41.4131	-1.28375	GNA11	G protein subunit alpha 11
215118_s_at	2.43e-20	1.12e-22	-15.0162	41.3004	-2.89765	IGH	immunoglobulin heavy locus
203022_at	2.43e-20	1.12e-22	15.0153	41.2972	1.56694	RNASEH2A	ribonuclease H2 subunit A
205019_s_at	2.58e-20	1.2e-22	-14.9957	41.2323	-1.85865	VIPR1	vasoactive intestinal peptide receptor 1
212296_at	2.65e-20	1.24e-22	14.9866	41.2023	0.803203	PSMD14	proteasome 26S subunit, non-ATPase 14
203913_s_at	3.09e-20	1.45e-22	-14.9393	41.0452	-2.28749	HPGD	hydroxyprostaglandin dehydrogenase 15-(NAD)
202503_s_at	3.17e-20	1.49e-22	14.9303	41.0153	1.69838	KIAA0101	KIAA0101
212713_at	3.28e-20	1.55e-22	-14.9194	40.9792	-4.06842	MFAP4	microfibrillar associated protein 4
202994_s_at	3.35e-20	1.59e-22	-14.9119	40.9541	-3.43917	FBLN1	fibulin 1
219682_s_at	3.37e-20	1.6e-22	14.909	40.9447	1.74162	TBX3	T-box 3
204038_s_at	3.46e-20	1.65e-22	-14.8999	40.9143	-1.38897	LPAR1	lysophosphatidic acid receptor 1
217154_s_at	3.51e-20	1.68e-22	-14.8948	40.8971	-3.42852	EDN3	endothelin 3
206100_at	3.65e-20	1.75e-22	-14.882	40.8546	-2.59089	CPM	carboxypeptidase M
202894_at	4.07e-20	1.96e-22	14.8483	40.7423	1.13151	EPHB4	EPH receptor B4
212398_at	4.21e-20	2.04e-22	-14.8372	40.7053	-1.78874	RDX	radixin
204170_s_at	4.25e-20	2.07e-22	14.8328	40.6907	1.36137	CKS2	CDC28 protein kinase regulatory subunit 2
212956_at	4.47e-20	2.18e-22	-14.8172	40.6388	-2.23793	TBC1D9	TBC1 domain family member 9
200910_at	4.47e-20	2.19e-22	14.8161	40.6351	0.931047	LOC101927137///CCT3	uncharacterized LOC101927137///chaperonin containing TCP1 subunit 3
225575_at	4.58e-20	2.26e-22	-14.8073	40.6056	-3.35716	LIFR	leukemia inhibitory factor receptor alpha
204127_at	4.62e-20	2.28e-22	14.8038	40.594	1.08747	RFC3	replication factor C subunit 3
200064_at	4.65e-20	2.31e-22	14.8008	40.5839	0.820635	HSP90AB1	heat shock protein 90 alpha family class B member 1
201614_s_at	4.71e-20	2.34e-22	14.7962	40.5686	1.59527	RUVBL1	RuvB like AAA ATPase 1
227586_at	4.84e-20	2.42e-22	-14.7866	40.5363	-1.05289	TMEM170A	transmembrane protein 170A
200807_s_at	4.91e-20	2.46e-22	14.7814	40.5192	0.705049	HSPD1	heat shock protein family D (Hsp60) member 1
203462_x_at	5.01e-20	2.52e-22	14.7745	40.4962	0.947459	EIF3B	eukaryotic translation initiation factor 3 subunit B
218796_at	5.03e-20	2.54e-22	14.7719	40.4872	1.38676	FERMT1	fermitin family member 1
205470_s_at	5.33e-20	2.7e-22	14.7541	40.4278	2.95684	KLK11	kallikrein related peptidase 11
227265_at	5.33e-20	2.71e-22	-14.7529	40.4236	-1.8665	FGL2	fibrinogen like 2
213320_at	5.4e-20	2.75e-22	14.7481	40.4077	1.34301	PRMT3	protein arginine methyltransferase 3
220291_at	6.29e-20	3.22e-22	-14.7017	40.2522	-3.48384	GDPD2	glycerophosphodiester phosphodiesterase domain containing 2
237530_at	6.31e-20	3.24e-22	-14.6997	40.2455	-5.12878
202779_s_at	6.32e-20	3.26e-22	14.6979	40.2395	1.61676	UBE2S	ubiquitin conjugating enzyme E2 S
235706_at	6.39e-20	3.31e-22	-14.694	40.2264	-2.23625	CPM	carboxypeptidase M
235570_at	6.76e-20	3.51e-22	-14.6759	40.1658	-1.69325	RBMS3	RNA binding motif single stranded interacting protein 3
224603_at	6.82e-20	3.56e-22	14.6724	40.1541	1.07299	SNHG16///SNORD1C///SNORD1A	small nucleolar RNA host gene 16///small nucleolar RNA, C/D box 1C///small nucleolar RNA, C/D box 1A
212594_at	6.97e-20	3.65e-22	-14.6648	40.1287	-1.60909	MIR4680///PDCD4	microRNA 4680///programmed cell death 4 (neoplastic transformation inhibitor)
225676_s_at	7.08e-20	3.72e-22	14.6592	40.1097	1.06359	DCAF13	DDB1 and CUL4 associated factor 13
228835_at	7.26e-20	3.82e-22	-14.6511	40.0823	-1.73799
220136_s_at	7.31e-20	3.87e-22	-14.6478	40.0712	-4.03906	CRYBA2	crystallin beta A2
218507_at	7.51e-20	3.98e-22	14.639	40.0418	1.16571	HILPDA	hypoxia inducible lipid droplet associated
226932_at	7.63e-20	4.08e-22	-14.6317	40.0173	-1.57731	SSPN	sarcospan
232739_at	7.63e-20	4.08e-22	-14.6314	40.0164	-3.07778	SPIB	Spi-B transcription factor
237400_at	7.63e-20	4.09e-22	-14.6312	40.0155	-1.41635	ATP5S	ATP synthase, H+ transporting, mitochondrial Fo complex subunit s (factor B)
205394_at	7.71e-20	4.15e-22	14.627	40.0013	1.31827	CHEK1	checkpoint kinase 1
226490_at	7.78e-20	4.2e-22	-14.6233	39.989	-1.28425	NHSL1	NHS like 1
212188_at	8.28e-20	4.48e-22	-14.6039	39.9237	-2.08277	KCTD12	potassium channel tetramerization domain containing 12
211501_s_at	8.35e-20	4.54e-22	14.6005	39.9123	1.10989	EIF3B	eukaryotic translation initiation factor 3 subunit B
223229_at	8.72e-20	4.75e-22	14.5867	39.8657	1.44728	UBE2T	ubiquitin conjugating enzyme E2 T
211714_x_at	9.04e-20	4.94e-22	14.5753	39.8276	0.950874	TUBB	tubulin beta class I
218900_at	9.06e-20	4.97e-22	-14.5737	39.8219	-1.40049	CNNM4	cyclin and CBS domain divalent metal cation transport mediator 4
213415_at	9.28e-20	5.11e-22	-14.5654	39.7942	-1.6333	CLIC2	chloride intracellular channel 2
211549_s_at	9.29e-20	5.13e-22	-14.5643	39.7903	-1.89858	HPGD	hydroxyprostaglandin dehydrogenase 15-(NAD)
214096_s_at	1.04e-19	5.75e-22	14.5307	39.6772	1.12501	SHMT2	serine hydroxymethyltransferase 2
212145_at	1.04e-19	5.79e-22	14.5288	39.6707	0.698871	MRPS27	mitochondrial ribosomal protein S27
225710_at	1.07e-19	5.95e-22	-14.5209	39.6439	-1.64019	GNB4	G protein subunit beta 4
208698_s_at	1.07e-19	6.01e-22	14.5177	39.6331	0.908937	NONO	non-POU domain containing, octamer-binding
201479_at	1.14e-19	6.41e-22	14.4986	39.5687	1.07598	MIR664B///SNORA56///DKC1	microRNA 664b///small nucleolar RNA, H/ACA box 56///dyskerin pseudouridine synthase 1
209612_s_at	1.14e-19	6.42e-22	-14.4982	39.5672	-4.85493	ADH1B	alcohol dehydrogenase 1B (class I), beta polypeptide
208787_at	1.14e-19	6.43e-22	14.4979	39.5662	0.727941	MRPL3	mitochondrial ribosomal protein L3
223509_at	1.15e-19	6.52e-22	14.4938	39.5524	4.17976	CLDN2	claudin 2
209301_at	1.15e-19	6.55e-22	-14.4924	39.5478	-3.16946	CA2	carbonic anhydrase 2
204033_at	1.17e-19	6.7e-22	14.4857	39.5249	1.77163	TRIP13	thyroid hormone receptor interactor 13
212288_at	1.19e-19	6.8e-22	-14.4817	39.5114	-1.38635	FNBP1	formin binding protein 1
202591_s_at	1.21e-19	6.95e-22	14.4749	39.4885	0.804612	SSBP1	single stranded DNA binding protein 1
224467_s_at	1.21e-19	6.95e-22	14.4749	39.4885	1.4216	PDCD2L	programmed cell death 2 like
228376_at	1.26e-19	7.27e-22	-14.4618	39.4442	-1.58275	GGTA1P	glycoprotein, alpha-galactosyltransferase 1 pseudogene
213295_at	1.41e-19	8.16e-22	-14.4279	39.3294	-1.14726	CYLD	CYLD lysine 63 deubiquitinase
220266_s_at	1.41e-19	8.18e-22	-14.4274	39.3278	-1.37983	KLF4	Kruppel like factor 4
214710_s_at	1.42e-19	8.3e-22	14.4231	39.313	1.67972	CCNB1	cyclin B1
200993_at	1.47e-19	8.63e-22	14.4118	39.2749	0.873607	IPO7	importin 7
203557_s_at	1.48e-19	8.67e-22	14.4102	39.2695	0.891616	PCBD1	pterin-4 alpha-carbinolamine dehydratase 1
204834_at	1.48e-19	8.77e-22	-14.4069	39.2583	-1.5958	FGL2	fibrinogen like 2
205434_s_at	1.48e-19	8.77e-22	-14.4068	39.258	-1.25802	AAK1	AP2 associated kinase 1
200994_at	1.48e-19	8.79e-22	14.4063	39.2563	0.875637	IPO7	importin 7
205126_at	1.48e-19	8.8e-22	14.4058	39.2546	0.938663	VRK2	vaccinia related kinase 2
225439_at	1.56e-19	9.29e-22	14.3903	39.2017	1.02658	NUDCD1	NudC domain containing 1
225541_at	1.57e-19	9.37e-22	14.3877	39.1932	2.29075	RPL22L1	ribosomal protein L22 like 1
201540_at	1.62e-19	9.7e-22	-14.3773	39.1579	-1.94228	FHL1	four and a half LIM domains 1
212601_at	1.64e-19	9.85e-22	-14.3731	39.1435	-1.06257	ZZEF1	zinc finger ZZ-type and EF-hand domain containing 1
201853_s_at	1.68e-19	1.02e-21	14.3637	39.1117	1.58866	CDC25B	cell division cycle 25B
224523_s_at	1.71e-19	1.04e-21	14.3578	39.0917	1.4795	CMSS1	cms1 ribosomal small subunit homolog (yeast)
226438_at	1.74e-19	1.06e-21	14.3528	39.0746	1.21721	SNTB1	syntrophin beta 1
204281_at	1.74e-19	1.06e-21	14.3513	39.0693	2.60743	TEAD4	TEA domain transcription factor 4
222890_at	1.81e-19	1.1e-21	14.34	39.031	1.34628	CCDC113	coiled-coil domain containing 113
226489_at	1.86e-19	1.14e-21	-14.3297	38.9961	-1.62284	TMCC3	transmembrane and coiled-coil domain family 3
219010_at	1.95e-19	1.2e-21	-14.3151	38.9464	-1.035	C1orf106	chromosome 1 open reading frame 106
230264_s_at	1.99e-19	1.22e-21	-14.3097	38.9278	-1.42695	AP1S2	adaptor related protein complex 1 sigma 2 subunit
225522_at	2e-19	1.23e-21	-14.3073	38.9199	-1.06335	AAK1	AP2 associated kinase 1
201139_s_at	2e-19	1.24e-21	14.3058	38.9147	0.84116	SSB	Sjogren syndrome antigen B
223158_s_at	2.09e-19	1.3e-21	14.2928	38.8703	1.15292	NEK6	NIMA related kinase 6
235849_at	2.12e-19	1.32e-21	-14.2871	38.8508	-2.80714	SCARA5	scavenger receptor class A member 5
226254_s_at	2.19e-19	1.37e-21	14.2771	38.817	1.0004	CFAP97	cilia and flagella associated protein 97
225606_at	2.22e-19	1.39e-21	-14.2717	38.7986	-1.33904	BCL2L11	BCL2 like 11
207140_at	2.27e-19	1.43e-21	-14.2647	38.7745	-3.98531	ALPI	alkaline phosphatase, intestinal
206209_s_at	2.27e-19	1.43e-21	-14.2643	38.7734	-5.48352	CA4	carbonic anhydrase 4
204855_at	2.27e-19	1.44e-21	14.2624	38.7668	3.77012	SERPINB5	serpin family B member 5
203498_at	2.38e-19	1.51e-21	-14.2478	38.7172	-1.74993	RCAN2	regulator of calcineurin 2
211671_s_at	2.5e-19	1.59e-21	-14.233	38.6664	-2.06329	NR3C1	nuclear receptor subfamily 3 group C member 1
217967_s_at	2.52e-19	1.61e-21	-14.2304	38.6577	-1.9419	FAM129A	family with sequence similarity 129 member A
201467_s_at	2.52e-19	1.61e-21	14.2291	38.6533	2.10792	NQO1	NAD(P)H quinone dehydrogenase 1
1552619_a_at	2.54e-19	1.63e-21	14.2257	38.6415	1.91331	ANLN	anillin actin binding protein
203612_at	2.54e-19	1.64e-21	14.2248	38.6385	1.52778	BYSL	bystin like
224714_at	2.64e-19	1.71e-21	14.2127	38.5973	0.773706	NIFK	nucleolar protein interacting with the FHA domain of MKI67
201608_s_at	2.64e-19	1.71e-21	14.2118	38.5941	0.884249	PWP1	PWP1 homolog, endonuclein
221514_at	2.64e-19	1.71e-21	14.2114	38.5928	1.02652	UTP14A	UTP14A small subunit processome component
212282_at	2.69e-19	1.75e-21	14.2053	38.5719	1.19615	TMEM97	transmembrane protein 97
217207_s_at	2.71e-19	1.77e-21	-14.2025	38.5622	-1.97533	BTNL3	butyrophilin like 3
221696_s_at	2.75e-19	1.8e-21	-14.1975	38.5452	-1.26576	STYK1	serine/threonine/tyrosine kinase 1
212192_at	2.8e-19	1.84e-21	-14.191	38.5228	-2.19733	KCTD12	potassium channel tetramerization domain containing 12
211896_s_at	2.89e-19	1.91e-21	-14.1808	38.488	-1.8302	DCN	decorin
219293_s_at	2.9e-19	1.91e-21	14.1795	38.4838	0.786682	OLA1	Obg-like ATPase 1
1564323_at	3.02e-19	2e-21	-14.1669	38.4407	-2.79029	LOC101928405	uncharacterized LOC101928405
211813_x_at	3.03e-19	2.01e-21	-14.1653	38.4352	-1.8857	DCN	decorin
1563692_at	3.09e-19	2.06e-21	-14.1583	38.4113	-4.3245
231579_s_at	3.09e-19	2.06e-21	-14.1578	38.4094	-1.50664	TIMP2	TIMP metallopeptidase inhibitor 2
225328_at	3.09e-19	2.07e-21	-14.1565	38.4051	-1.7605	FBXO32	F-box protein 32
203895_at	3.09e-19	2.08e-21	14.1561	38.4034	1.73155	PLCB4	phospholipase C beta 4
202995_s_at	3.11e-19	2.09e-21	-14.154	38.3964	-2.92539	FBLN1	fibulin 1
201865_x_at	3.11e-19	2.1e-21	-14.1526	38.3915	-1.974	NR3C1	nuclear receptor subfamily 3 group C member 1
205412_at	3.12e-19	2.11e-21	-14.1512	38.3867	-1.30392	ACAT1	acetyl-CoA acetyltransferase 1
209627_s_at	3.16e-19	2.14e-21	14.1469	38.372	1.51228	OSBPL3	oxysterol binding protein like 3
223062_s_at	3.2e-19	2.18e-21	14.142	38.3554	2.62427	PSAT1	phosphoserine aminotransferase 1
225442_at	3.37e-19	2.3e-21	-14.1265	38.3022	-1.61611	DDR2	discoidin domain receptor tyrosine kinase 2
217989_at	3.45e-19	2.37e-21	-14.1181	38.2734	-1.0071	HSD17B11	hydroxysteroid 17-beta dehydrogenase 11
212279_at	3.45e-19	2.37e-21	14.1178	38.2725	1.17226	TMEM97	transmembrane protein 97
227088_at	3.48e-19	2.4e-21	-14.1144	38.2607	-1.63599	PDE5A	phosphodiesterase 5A
205464_at	3.73e-19	2.57e-21	-14.0939	38.1903	-4.14084	SCNN1B	sodium channel epithelial 1 beta subunit
212686_at	3.92e-19	2.71e-21	14.0788	38.1385	1.56003	PPM1H	protein phosphatase, Mg2+/Mn2+ dependent 1H
218156_s_at	4.14e-19	2.87e-21	14.0622	38.0816	1.23853	TSR1	TSR1, ribosome maturation factor
203344_s_at	4.23e-19	2.94e-21	14.0553	38.0578	1.04005	RBBP8	RB binding protein 8, endonuclease
204744_s_at	4.27e-19	2.98e-21	14.0518	38.0456	0.986745	IARS	isoleucyl-tRNA synthetase
217757_at	4.44e-19	3.1e-21	-14.0397	38.0043	-1.52513	A2M	alpha-2-macroglobulin
222760_at	4.48e-19	3.14e-21	14.0367	37.9938	1.13316	ZNF703	zinc finger protein 703
222773_s_at	4.68e-19	3.29e-21	-14.0229	37.9464	-1.61385	GALNT12	polypeptide N-acetylgalactosaminyltransferase 12
220435_at	4.68e-19	3.29e-21	-14.0225	37.9448	-5.10245	SLC30A10	solute carrier family 30 member 10
200875_s_at	4.77e-19	3.37e-21	14.0162	37.9231	1.20923	MIR1292///SNORD110///SNORD86///SNORD57///NOP56	microRNA 1292///small nucleolar RNA, C/D box 110///small nucleolar RNA, C/D box 86///small nucleolar RNA, C/D box 57///NOP56 ribonucleoprotein
224694_at	4.84e-19	3.43e-21	-14.0108	37.9047	-1.37536	ANTXR1	anthrax toxin receptor 1
60474_at	4.84e-19	3.43e-21	14.0107	37.9043	1.23635	FERMT1	fermitin family member 1
205384_at	4.91e-19	3.49e-21	-14.0055	37.8864	-3.26434	FXYD1	FXYD domain containing ion transport regulator 1
212160_at	4.94e-19	3.53e-21	14.0028	37.8771	0.981985	XPOT	exportin for tRNA
202148_s_at	4.97e-19	3.55e-21	14.0007	37.87	1.25668	PYCR1	pyrroline-5-carboxylate reductase 1
218481_at	5.05e-19	3.62e-21	13.9951	37.8504	0.983682	EXOSC5	exosome component 5
212922_s_at	5.48e-19	3.94e-21	13.9709	37.7672	0.814723	SMYD2	SET and MYND domain containing 2
222993_at	5.54e-19	3.99e-21	13.9672	37.7544	0.722487	MRPL37	mitochondrial ribosomal protein L37
214106_s_at	5.54e-19	4e-21	13.9664	37.7515	1.34225	GMDS	GDP-mannose 4,6-dehydratase
220994_s_at	5.57e-19	4.03e-21	13.9642	37.7441	1.37384	STXBP6	syntaxin binding protein 6
218730_s_at	6.04e-19	4.38e-21	-13.9401	37.661	-4.78417	OGN	osteoglycin
201014_s_at	6.09e-19	4.44e-21	13.9368	37.6494	1.21764	PAICS	phosphoribosylaminoimidazole carboxylase; phosphoribosylaminoimidazolesuccinocarboxamide synthase
212116_at	6.17e-19	4.5e-21	13.9324	37.6343	0.980503	TRIM27	tripartite motif containing 27
209332_s_at	6.2e-19	4.54e-21	-13.9303	37.6272	-0.854532	MAX	MYC associated factor X
227827_at	6.45e-19	4.73e-21	-13.9184	37.5859	-3.15289	SORBS2	sorbin and SH3 domain containing 2
217988_at	6.74e-19	4.96e-21	13.9049	37.5392	0.876485	CCNB1IP1	cyclin B1 interacting protein 1
230082_at	6.76e-19	4.98e-21	-13.9033	37.5339	-1.27588
240389_at	6.76e-19	5e-21	-13.9025	37.5311	-4.12251	TRPM6	transient receptor potential cation channel subfamily M member 6
213309_at	6.89e-19	5.1e-21	-13.8964	37.51	-1.27329	PLCL2	phospholipase C like 2
212018_s_at	7.02e-19	5.21e-21	13.8905	37.4895	0.942942	RSL1D1	ribosomal L1 domain containing 1
201801_s_at	7.46e-19	5.56e-21	13.8721	37.4259	1.61343	SLC29A1	solute carrier family 29 member 1 (Augustine blood group)
204846_at	7.65e-19	5.71e-21	-13.8642	37.3986	-3.62962	CP	ceruloplasmin (ferroxidase)
211725_s_at	7.71e-19	5.76e-21	13.8615	37.3893	1.03592	BID	BH3 interacting domain death agonist
209080_x_at	7.81e-19	5.85e-21	13.8571	37.3739	0.959668	GLRX3	glutaredoxin 3
229670_at	8.21e-19	6.17e-21	-13.8421	37.322	-1.66957
227539_at	8.4e-19	6.33e-21	-13.8347	37.2962	-0.908558	GNA13	G protein subunit alpha 13
201138_s_at	8.45e-19	6.38e-21	13.8325	37.2887	0.804916	SSB	Sjogren syndrome antigen B
226751_at	8.45e-19	6.4e-21	-13.8315	37.2853	-1.67202	CNRIP1	cannabinoid receptor interacting protein 1
204175_at	8.74e-19	6.64e-21	13.8212	37.2495	1.19066	ZNF593	zinc finger protein 593
212813_at	8.84e-19	6.72e-21	-13.8174	37.2364	-1.29557	JAM3	junctional adhesion molecule 3
219148_at	9.38e-19	7.16e-21	13.7996	37.1747	1.71325	PBK	PDZ binding kinase
211762_s_at	9.38e-19	7.17e-21	13.7991	37.1727	1.50922	KPNA2	karyopherin subunit alpha 2
228333_at	9.65e-19	7.39e-21	-13.7902	37.142	-1.93435	ZEB2	zinc finger E-box binding homeobox 2
226793_at	9.78e-19	7.51e-21	-13.7857	37.1263	-1.24613	LINC00294	long intergenic non-protein coding RNA 294
214765_s_at	9.83e-19	7.57e-21	-13.7836	37.1189	-1.94562	NAAA	N-acylethanolamine acid amidase
203963_at	1.01e-18	7.8e-21	-13.7749	37.0887	-1.2805	CA12	carbonic anhydrase 12
201842_s_at	1.02e-18	7.89e-21	-13.7716	37.0772	-2.04288	EFEMP1	EGF containing fibulin like extracellular matrix protein 1
203420_at	1.02e-18	7.94e-21	-13.7699	37.0714	-1.10079	FAM8A1	family with sequence similarity 8 member A1
208300_at	1.03e-18	8.01e-21	-13.7673	37.0623	-1.39595	PTPRH	protein tyrosine phosphatase, receptor type H
228766_at	1.06e-18	8.23e-21	-13.7595	37.0353	-2.22097	CD36	CD36 molecule
231773_at	1.14e-18	8.87e-21	-13.7382	36.9613	-5.33383	ANGPTL1	angiopoietin like 1
212281_s_at	1.22e-18	9.53e-21	13.7177	36.8898	1.18996	TMEM97	transmembrane protein 97
204204_at	1.22e-18	9.61e-21	-13.7155	36.8822	-1.19584	SLC31A2	solute carrier family 31 member 2
203961_at	1.25e-18	9.8e-21	13.7099	36.8628	1.80964	NEBL	nebulette
204829_s_at	1.28e-18	1.01e-20	-13.7023	36.8361	-1.87008	FOLR2	folate receptor beta
210962_s_at	1.28e-18	1.01e-20	-13.7016	36.8337	-1.13793	AKAP9	A-kinase anchoring protein 9
227481_at	1.28e-18	1.01e-20	-13.7004	36.8296	-1.43915	CNKSR3	CNKSR family member 3
208758_at	1.31e-18	1.04e-20	13.6935	36.8055	1.03842	ATIC	5-aminoimidazole-4-carboxamide ribonucleotide formyltransferase/IMP cyclohydrolase
202687_s_at	1.34e-18	1.07e-20	-13.6849	36.7756	-1.04524	TNFSF10	tumor necrosis factor superfamily member 10
1559946_s_at	1.5e-18	1.19e-20	13.6537	36.6667	0.989915	RUVBL2	RuvB like AAA ATPase 2
225763_at	1.51e-18	1.21e-20	-13.6504	36.6551	-1.64692	RCSD1	RCSD domain containing 1
205523_at	1.52e-18	1.22e-20	-13.6472	36.644	-2.56611	HAPLN1	hyaluronan and proteoglycan link protein 1
220180_at	1.53e-18	1.23e-20	-13.6451	36.6366	-1.63472	CCDC68	coiled-coil domain containing 68
210302_s_at	1.56e-18	1.25e-20	-13.6398	36.6183	-2.06016	MAB21L2	mab-21 like 2
215867_x_at	1.58e-18	1.28e-20	-13.6345	36.5998	-1.19506	CA12	carbonic anhydrase 12
221102_s_at	1.6e-18	1.29e-20	-13.6313	36.5884	-3.55772	TRPM6	transient receptor potential cation channel subfamily M member 6
225604_s_at	1.64e-18	1.33e-20	-13.6233	36.5607	-1.46761	GLIPR2	GLI pathogenesis related 2
233514_x_at	1.76e-18	1.43e-20	-13.6019	36.4857	-2.27892	TEX11	testis expressed 11
206208_at	1.76e-18	1.44e-20	-13.6005	36.481	-4.8885	CA4	carbonic anhydrase 4
235019_at	1.76e-18	1.44e-20	-13.6004	36.4805	-2.42658	CPM	carboxypeptidase M
208308_s_at	1.78e-18	1.45e-20	13.5975	36.4702	0.773698	GPI	glucose-6-phosphate isomerase
222500_at	1.78e-18	1.46e-20	13.5967	36.4675	1.26437	PPIL1	peptidylprolyl isomerase like 1
201329_s_at	1.78e-18	1.46e-20	13.5959	36.4646	1.22578	ETS2	ETS proto-oncogene 2, transcription factor
218309_at	1.79e-18	1.47e-20	-13.5937	36.457	-1.44079	CAMK2N1	calcium/calmodulin dependent protein kinase II inhibitor 1
224560_at	1.8e-18	1.49e-20	-13.5909	36.4472	-1.39854	TIMP2	TIMP metallopeptidase inhibitor 2
202309_at	1.81e-18	1.5e-20	13.5896	36.4426	1.10151	MTHFD1	methylenetetrahydrofolate dehydrogenase, cyclohydrolase and formyltetrahydrofolate synthetase 1
215380_s_at	1.86e-18	1.54e-20	13.5805	36.4111	0.962164	GGCT	gamma-glutamylcyclotransferase
225895_at	1.94e-18	1.61e-20	-13.5684	36.3687	-2.20639	SYNPO2	synaptopodin 2
225340_s_at	2.01e-18	1.68e-20	13.5573	36.3298	0.655404	CAPRIN1	cell cycle associated protein 1
209398_at	2.02e-18	1.69e-20	-13.5555	36.3234	-1.79373	HIST1H1C	histone cluster 1, H1c
221841_s_at	2.12e-18	1.77e-20	-13.541	36.2727	-1.14777	KLF4	Kruppel like factor 4
211737_x_at	2.13e-18	1.79e-20	-13.5389	36.2652	-2.15362	PTN	pleiotrophin
226353_at	2.2e-18	1.85e-20	-13.5292	36.2313	-0.985906	SPPL2A	signal peptide peptidase like 2A
223046_at	2.24e-18	1.89e-20	-13.5235	36.2112	-0.762737	EGLN1	egl-9 family hypoxia inducible factor 1
201890_at	2.32e-18	1.96e-20	13.5132	36.1752	1.74539	RRM2	ribonucleotide reductase regulatory subunit M2
209763_at	2.33e-18	1.97e-20	-13.5117	36.1697	-3.88579	CHRDL1	chordin like 1
203896_s_at	2.33e-18	1.97e-20	13.5108	36.1668	1.75575	PLCB4	phospholipase C beta 4
203980_at	2.38e-18	2.02e-20	-13.5042	36.1435	-3.98943	FABP4	fatty acid binding protein 4
224601_at	2.38e-18	2.03e-20	13.5035	36.1411	1.00007	SNHG16///SNORD1C///SNORD1A	small nucleolar RNA host gene 16///small nucleolar RNA, C/D box 1C///small nucleolar RNA, C/D box 1A
210298_x_at	2.4e-18	2.04e-20	-13.5013	36.1332	-1.98634	FHL1	four and a half LIM domains 1
201497_x_at	2.49e-18	2.12e-20	-13.4903	36.0947	-2.88487	MYH11	myosin heavy chain 11
228640_at	2.5e-18	2.14e-20	-13.4881	36.087	-2.85989	PCDH7	protocadherin 7
201115_at	2.53e-18	2.17e-20	13.4836	36.071	0.956351	POLD2	DAN polymerase delta 2, accessory subunit
240422_at	2.53e-18	2.18e-20	-13.4828	36.0684	-1.71066
232245_at	2.53e-18	2.18e-20	-13.4825	36.0673	-3.76695	SLC25A34	solute carrier family 25 member 34
212233_at	2.56e-18	2.21e-20	-13.4784	36.0529	-1.38974	MAP1B	microtubule associated protein 1B
225578_at	2.73e-18	2.36e-20	13.46	35.9881	1.23574	MZT1	mitotic spindle organizing protein 1
220643_s_at	2.76e-18	2.4e-20	13.4561	35.9746	1.17373	FAIM	Fas apoptotic inhibitory molecule
217628_at	2.77e-18	2.41e-20	-13.4545	35.9688	-1.68536	CLIC5	chloride intracellular channel 5
202620_s_at	2.77e-18	2.41e-20	-13.454	35.967	-1.71011	PLOD2	procollagen-lysine,2-oxoglutarate 5-dioxygenase 2
1554027_a_at	2.77e-18	2.42e-20	-13.4538	35.9664	-2.73137	SLC4A4	solute carrier family 4 member 4
220834_at	2.81e-18	2.45e-20	-13.4495	35.9512	-5.88091	MS4A12	membrane spanning 4-domains A12
226841_at	2.94e-18	2.58e-20	-13.4357	35.9028	-1.83539	MPEG1	macrophage expressed 1
217562_at	2.95e-18	2.59e-20	-13.4339	35.8965	-4.88578	BRINP3	BMP/retinoic acid inducible neural specific 3
201743_at	3.04e-18	2.67e-20	-13.425	35.8652	-1.64786	CD14	CD14 molecule
202613_at	3.19e-18	2.81e-20	13.411	35.8157	1.86954	CTPS1	CTP synthase 1
212573_at	3.23e-18	2.85e-20	-13.407	35.8017	-1.33349	ENDOD1	endonuclease domain containing 1
1554768_a_at	3.28e-18	2.91e-20	13.4015	35.7825	1.57475	MAD2L1	MAD2 mitotic arrest deficient-like 1 (yeast)
213944_x_at	3.32e-18	2.94e-20	-13.398	35.7701	-1.04504	GNA11	G protein subunit alpha 11
204931_at	3.32e-18	2.95e-20	-13.3975	35.7684	-1.82074	TCF21	transcription factor 21
227230_s_at	3.33e-18	2.97e-20	-13.3954	35.761	-1.48606	KIAA1211	KIAA1211
1554685_a_at	3.34e-18	2.98e-20	13.3946	35.7581	3.72336	CEMIP	cell migration inducing hyaluronan binding protein
217996_at	3.42e-18	3.06e-20	13.3869	35.7311	2.15693	PHLDA1	pleckstrin homology like domain family A member 1
240770_at	3.47e-18	3.11e-20	-13.3828	35.7165	-1.77305	TMEM171	transmembrane protein 171
201349_at	3.48e-18	3.13e-20	-13.3809	35.7098	-1.43969	SLC9A3R1	SLC9A3 regulator 1
208920_at	3.48e-18	3.13e-20	-13.3807	35.709	-1.42757	SRI	sorcin
218885_s_at	3.5e-18	3.16e-20	-13.3779	35.6991	-1.46163	GALNT12	polypeptide N-acetylgalactosaminyltransferase 12
201770_at	3.5e-18	3.17e-20	13.3775	35.6976	0.976298	SNRPA	small nuclear ribonucleoprotein polypeptide A
201453_x_at	3.59e-18	3.25e-20	13.3698	35.6706	0.834347	RHEB	Ras homolog enriched in brain
207260_at	3.73e-18	3.39e-20	-13.3585	35.6307	-3.61013	FEV	FEV, ETS transcription factor
219038_at	3.74e-18	3.4e-20	13.357	35.6256	1.26039	MORC4	MORC family CW-type zinc finger 4
202475_at	3.78e-18	3.44e-20	13.3537	35.6139	1.02073	TMEM147	transmembrane protein 147
202388_at	3.87e-18	3.53e-20	-13.3467	35.5892	-1.76544	RGS2	regulator of G-protein signaling 2
231120_x_at	3.87e-18	3.54e-20	-13.3461	35.587	-2.71827	PKIB	protein kinase (cAMP-dependent, catalytic) inhibitor beta
212397_at	3.92e-18	3.59e-20	-13.342	35.5725	-1.95761	RDX	radixin
223266_at	3.98e-18	3.66e-20	-13.3368	35.5542	-1.18763	STRADB	STE20-related kinase adaptor beta
203603_s_at	3.98e-18	3.66e-20	-13.3366	35.5535	-2.10034	ZEB2	zinc finger E-box binding homeobox 2
218084_x_at	3.99e-18	3.68e-20	13.335	35.5478	1.70852	FXYD5	FXYD domain containing ion transport regulator 5
204248_at	4e-18	3.7e-20	-13.3338	35.5437	-1.39629	GNA11	G protein subunit alpha 11
205950_s_at	4.2e-18	3.89e-20	-13.3197	35.4939	-5.93867	CA1	carbonic anhydrase 1
222405_at	4.22e-18	3.91e-20	13.3178	35.4872	0.922798	HACD3	3-hydroxyacyl-CoA dehydratase 3
203305_at	4.3e-18	4e-20	-13.3117	35.4655	-2.99506	F13A1	coagulation factor XIII A chain
1559977_a_at	4.33e-18	4.03e-20	-13.3095	35.4577	-2.33782	SLC25A34	solute carrier family 25 member 34
228302_x_at	4.36e-18	4.07e-20	-13.3069	35.4484	-1.66701	CAMK2N1	calcium/calmodulin dependent protein kinase II inhibitor 1
201459_at	4.47e-18	4.18e-20	13.2991	35.4209	1.13443	RUVBL2	RuvB like AAA ATPase 2
218561_s_at	4.47e-18	4.19e-20	13.2989	35.4202	0.835582	LYRM4	LYR motif containing 4
201912_s_at	4.55e-18	4.26e-20	13.2936	35.4016	0.708509	GSPT1	G1 to S phase transition 1
213624_at	4.58e-18	4.31e-20	-13.2907	35.3912	-1.89784	SMPDL3A	sphingomyelin phosphodiesterase acid like 3A
203219_s_at	4.58e-18	4.32e-20	13.2903	35.3898	0.903853	APRT	adenine phosphoribosyltransferase
226784_at	4.58e-18	4.33e-20	13.2896	35.3874	0.886429	TWISTNB	TWIST neighbor
221259_s_at	4.65e-18	4.39e-20	-13.2852	35.3717	-2.88529	TEX11	testis expressed 11
225842_at	4.67e-18	4.42e-20	13.2835	35.3655	2.16603	PHLDA1	pleckstrin homology like domain family A member 1
204508_s_at	4.7e-18	4.46e-20	-13.2812	35.3574	-1.38494	CA12	carbonic anhydrase 12
225545_at	4.7e-18	4.47e-20	-13.2801	35.3538	-1.07262	LOC101930123///EEF2K	eukaryotic elongation factor 2 kinase///eukaryotic elongation factor 2 kinase
231975_s_at	4.73e-18	4.51e-20	-13.2781	35.3465	-1.41326	MIER3	MIER family member 3
218095_s_at	4.79e-18	4.57e-20	13.274	35.3323	0.846291	TMEM165	transmembrane protein 165
212593_s_at	4.79e-18	4.58e-20	-13.2737	35.3311	-1.05392	MIR4680///PDCD4	microRNA 4680///programmed cell death 4 (neoplastic transformation inhibitor)
203023_at	4.79e-18	4.59e-20	13.2729	35.3281	1.12848	NOP16	NOP16 nucleolar protein
210675_s_at	4.88e-18	4.68e-20	-13.2674	35.3087	-3.13688	PTPRR	protein tyrosine phosphatase, receptor type R
223328_at	4.97e-18	4.78e-20	13.2615	35.2877	0.945781	ARMC10	armadillo repeat containing 10
204359_at	5.01e-18	4.82e-20	-13.259	35.2791	-2.45872	LOC100506718///FLRT2	uncharacterized LOC100506718///fibronectin leucine rich transmembrane protein 2
1559884_at	5.01e-18	4.84e-20	-13.258	35.2755	-4.60936	CDKN2B-AS1	CDKN2B antisense RNA 1
224654_at	5.09e-18	4.92e-20	13.2534	35.259	1.20744	DDX21	DEAD-box helicase 21
209541_at	5.21e-18	5.05e-20	-13.2461	35.2333	-2.0613	IGF1	insulin like growth factor 1
218768_at	5.33e-18	5.17e-20	13.2395	35.21	0.824079	NUP107	nucleoporin 107
204244_s_at	5.39e-18	5.24e-20	13.2358	35.1969	1.07342	DBF4	DBF4 zinc finger
214431_at	5.41e-18	5.28e-20	13.234	35.1903	1.01082	GMPS	guanine monophosphate synthase
225777_at	5.5e-18	5.37e-20	13.2288	35.1721	1.29206	SAPCD2	suppressor APC domain containing 2
212125_at	5.57e-18	5.45e-20	13.2247	35.1574	1.17498	RANGAP1	Ran GTPase activating protein 1
218984_at	5.63e-18	5.51e-20	13.2215	35.1462	1.28665	PUS7	pseudouridylate synthase 7 (putative)
202168_at	5.69e-18	5.58e-20	13.2181	35.1338	0.682831	AK6///TAF9	adenylate kinase 6///TATA-box binding protein associated factor 9
206000_at	5.75e-18	5.66e-20	-13.2143	35.1207	-2.15897	MEP1A	meprin A subunit alpha
228854_at	5.82e-18	5.74e-20	-13.2106	35.1073	-3.72177
238177_at	5.84e-18	5.76e-20	-13.2091	35.1022	-3.95624	SLC6A19	solute carrier family 6 member 19
203925_at	5.99e-18	5.93e-20	13.2013	35.0745	1.24733	GCLM	glutamate-cysteine ligase modifier subunit
206818_s_at	6.17e-18	6.12e-20	-13.1925	35.043	-1.33026	CNNM2	cyclin and CBS domain divalent metal cation transport mediator 2
221246_x_at	6.2e-18	6.16e-20	-13.1907	35.0368	-1.51132	TNS1	tensin 1
206869_at	6.24e-18	6.21e-20	-13.1883	35.0282	-2.99869	CHAD	chondroadherin
226360_at	6.33e-18	6.31e-20	13.1839	35.0125	1.36382	ZNRF3	zinc and ring finger 3
224913_s_at	6.46e-18	6.45e-20	13.1777	34.9907	0.942353	TIMM50	translocase of inner mitochondrial membrane 50
205518_s_at	6.54e-18	6.54e-20	-13.1736	34.9762	-3.03175	CMAHP	cytidine monophospho-N-acetylneuraminic acid hydroxylase, pseudogene
214211_at	6.55e-18	6.56e-20	-13.1729	34.9737	-1.31447	FTH1	ferritin heavy chain 1
1566472_s_at	6.57e-18	6.6e-20	-13.1712	34.9676	-1.0449	LOC100996506///RETSAT	uncharacterized LOC100996506///retinol saturase
228113_at	6.8e-18	6.84e-20	-13.1612	34.932	-1.81915	RAB37	RAB37, member RAS oncogene family
223368_s_at	6.99e-18	7.04e-20	13.153	34.9029	1.25113	NTMT1	N-terminal Xaa-Pro-Lys N-methyltransferase 1
209656_s_at	7.02e-18	7.09e-20	-13.1513	34.8968	-1.969	TMEM47	transmembrane protein 47
1555733_s_at	7.08e-18	7.16e-20	13.1486	34.8873	1.73611	AP1S3	adaptor related protein complex 1 sigma 3 subunit
202831_at	7.08e-18	7.17e-20	13.1481	34.8853	1.09081	GPX2	glutathione peroxidase 2
1558324_a_at	7.44e-18	7.56e-20	-13.1335	34.8334	-3.58224	TMEM72	transmembrane protein 72
225207_at	7.6e-18	7.72e-20	-13.1273	34.8115	-1.78529	PDK4	pyruvate dehydrogenase kinase 4
205074_at	7.85e-18	8e-20	-13.1175	34.7767	-1.32279	SLC22A5	solute carrier family 22 member 5
201893_x_at	7.94e-18	8.11e-20	-13.1138	34.7633	-1.87093	DCN	decorin
227176_at	7.94e-18	8.12e-20	-13.1133	34.7615	-1.26009	SLC2A13	solute carrier family 2 member 13
232244_at	7.98e-18	8.18e-20	-13.1114	34.7549	-1.0831	KIAA1161	KIAA1161
207153_s_at	8.03e-18	8.24e-20	13.1094	34.7477	1.23075	GLMN	glomulin, FKBP associated protein
200873_s_at	8.19e-18	8.42e-20	13.1033	34.7261	0.750867	CCT8	chaperonin containing TCP1 subunit 8
228372_at	8.62e-18	8.88e-20	-13.0884	34.6729	-1.15081	C10orf128	chromosome 10 open reading frame 128
210517_s_at	8.89e-18	9.17e-20	-13.0794	34.6408	-1.90094	AKAP12	A-kinase anchoring protein 12
224331_s_at	8.92e-18	9.22e-20	13.078	34.6359	0.858969	MRPL36	mitochondrial ribosomal protein L36
210559_s_at	9.24e-18	9.57e-20	13.0675	34.5985	1.57116	CDK1	cyclin dependent kinase 1
210299_s_at	9.31e-18	9.65e-20	-13.0651	34.59	-1.99469	FHL1	four and a half LIM domains 1
218421_at	9.36e-18	9.72e-20	-13.0632	34.583	-1.35554	CERK	ceramide kinase
218708_at	9.81e-18	1.02e-19	13.0491	34.5327	0.889344	NXT1	nuclear transport factor 2 like export factor 1
233565_s_at	9.81e-18	1.02e-19	-13.0489	34.5318	-2.14489	FKBP1A-SDCBP2///SDCBP2	FKBP1A-SDCBP2 readthrough (NMD candidate)///syndecan binding protein 2
201088_at	9.81e-18	1.02e-19	13.0485	34.5305	1.25024	KPNA2	karyopherin subunit alpha 2
228280_at	9.98e-18	1.04e-19	13.0434	34.5122	1.39565	ZC3HAV1L	zinc finger CCCH-type containing, antiviral 1 like
200853_at	1.05e-17	1.1e-19	13.0299	34.4641	0.964717	H2AFZ	H2A histone family member Z
222116_s_at	1.08e-17	1.14e-19	13.0193	34.4263	1.05065	TBC1D16	TBC1 domain family member 16
225782_at	1.09e-17	1.15e-19	-13.0161	34.4147	-1.59059	MSRB3	methionine sulfoxide reductase B3
208637_x_at	1.12e-17	1.18e-19	13.0096	34.3917	1.07514	ACTN1	actinin alpha 1
206637_at	1.12e-17	1.18e-19	-13.0095	34.3911	-1.69142	P2RY14	purinergic receptor P2Y14
203845_at	1.12e-17	1.18e-19	-13.0094	34.391	-1.11783	KAT2B	lysine acetyltransferase 2B
200920_s_at	1.12e-17	1.18e-19	-13.0083	34.3871	-0.887367	BTG1	BTG anti-proliferation factor 1
201478_s_at	1.13e-17	1.2e-19	13.0047	34.3741	1.18216	MIR664B///SNORA56///DKC1	microRNA 664b///small nucleolar RNA, H/ACA box 56///dyskerin pseudouridine synthase 1
205983_at	1.13e-17	1.2e-19	13.0046	34.3737	4.81591	DPEP1	dipeptidase 1 (renal)
200812_at	1.15e-17	1.23e-19	12.9988	34.353	0.923098	CCT7	chaperonin containing TCP1 subunit 7
212419_at	1.16e-17	1.23e-19	-12.9969	34.3461	-1.46455	ZCCHC24	zinc finger CCHC-type containing 24
214359_s_at	1.19e-17	1.27e-19	12.9884	34.3159	0.844484	HSP90AB1	heat shock protein 90 alpha family class B member 1
223468_s_at	1.24e-17	1.33e-19	-12.976	34.2714	-2.10998	RGMA	repulsive guidance molecule family member a
215321_at	1.27e-17	1.36e-19	-12.9693	34.2473	-2.39072	RUNDC3B	RUN domain containing 3B
208688_x_at	1.27e-17	1.36e-19	12.9692	34.2473	0.944881	EIF3B	eukaryotic translation initiation factor 3 subunit B
223595_at	1.27e-17	1.36e-19	-12.9688	34.2459	-1.26916	TMEM133	transmembrane protein 133
242871_at	1.29e-17	1.39e-19	-12.9631	34.2251	-1.65041	PAQR5	progestin and adipoQ receptor family member 5
204977_at	1.3e-17	1.4e-19	12.9618	34.2206	0.865022	DDX10	DEAD-box helicase 10
1558643_s_at	1.32e-17	1.42e-19	-12.9573	34.2046	-1.92732	EDIL3	EGF like repeats and discoidin domains 3
228961_at	1.35e-17	1.46e-19	-12.9496	34.1768	-1.57378	MIER3	MIER family member 3
1554436_a_at	1.35e-17	1.47e-19	12.9489	34.1744	2.89842	REG4	regenerating family member 4
214679_x_at	1.35e-17	1.47e-19	-12.948	34.1711	-1.00067	GNA11	G protein subunit alpha 11
217871_s_at	1.38e-17	1.51e-19	12.9416	34.1484	1.13795	MIF	macrophage migration inhibitory factor (glycosylation-inhibiting factor)
201714_at	1.4e-17	1.52e-19	12.9381	34.1358	1.14177	TUBG1	tubulin gamma 1
206354_at	1.42e-17	1.55e-19	12.9334	34.1188	4.83248	SLCO1B3	solute carrier organic anion transporter family member 1B3
39582_at	1.44e-17	1.57e-19	-12.9297	34.1056	-1.08394	CYLD	CYLD lysine 63 deubiquitinase
206198_s_at	1.46e-17	1.6e-19	-12.9248	34.088	-3.55811	CEACAM7	carcinoembryonic antigen related cell adhesion molecule 7
218726_at	1.48e-17	1.62e-19	12.9215	34.0761	1.65332	HJURP	Holliday junction recognition protein
229367_s_at	1.54e-17	1.7e-19	-12.9082	34.0284	-1.64538	GIMAP6	GTPase, IMAP family member 6
231052_at	1.54e-17	1.7e-19	-12.908	34.0278	-1.19085	GLOD5	glyoxalase domain containing 5
228915_at	1.56e-17	1.72e-19	12.9045	34.0154	1.88572	DACH1	dachshund family transcription factor 1
204146_at	1.56e-17	1.73e-19	12.9036	34.0121	1.46899	RAD51AP1	RAD51 associated protein 1
214164_x_at	1.56e-17	1.73e-19	-12.9029	34.0095	-1.17022	CA12	carbonic anhydrase 12
204037_at	1.57e-17	1.74e-19	-12.9017	34.0053	-1.50591	LPAR1	lysophosphatidic acid receptor 1
208715_at	1.59e-17	1.77e-19	-12.897	33.9882	-0.955458	TMCO1	transmembrane and coiled-coil domains 1
219494_at	1.62e-17	1.8e-19	12.8915	33.9685	2.16387	RAD54B	RAD54 homolog B (S. cerevisiae)
208818_s_at	1.7e-17	1.9e-19	12.8777	33.9191	0.881695	COMT	catechol-O-methyltransferase
209373_at	1.7e-17	1.9e-19	-12.8773	33.9176	-2.16684	MALL	mal, T-cell differentiation protein like
1554452_a_at	1.7e-17	1.9e-19	12.8768	33.9159	1.11382	HILPDA	hypoxia inducible lipid droplet associated
236703_at	1.74e-17	1.95e-19	-12.8698	33.8907	-1.48934
203300_x_at	1.75e-17	1.97e-19	-12.8675	33.8825	-1.23861	AP1S2	adaptor related protein complex 1 sigma 2 subunit
201555_at	1.8e-17	2.02e-19	12.8597	33.8543	1.11205	MCM3	minichromosome maintenance complex component 3
225307_at	1.82e-17	2.04e-19	12.8569	33.8444	1.16474	ZNF511	zinc finger protein 511
207515_s_at	1.82e-17	2.05e-19	12.8564	33.8426	0.935368	POLR1C	RNA polymerase I subunit C
227530_at	1.91e-17	2.16e-19	-12.8417	33.7895	-2.20021	AKAP12	A-kinase anchoring protein 12
218384_at	1.94e-17	2.19e-19	12.8381	33.7767	1.07296	CARHSP1	calcium regulated heat stable protein 1
225721_at	1.95e-17	2.2e-19	-12.8363	33.7701	-1.67874	SYNPO2	synaptopodin 2
221747_at	1.96e-17	2.22e-19	-12.8337	33.7609	-1.83465	TNS1	tensin 1
209026_x_at	2.08e-17	2.37e-19	12.8162	33.698	1.0121	TUBB	tubulin beta class I
215178_x_at	2.1e-17	2.38e-19	-12.8143	33.6911	-1.55123	NAAA	N-acylethanolamine acid amidase
218644_at	2.13e-17	2.42e-19	12.8098	33.6748	1.18678	PLEK2	pleckstrin 2
225581_s_at	2.2e-17	2.51e-19	12.8006	33.6417	1.0349	MRPL50	mitochondrial ribosomal protein L50
235512_at	2.24e-17	2.56e-19	-12.795	33.6215	-1.49851	CDKL1	cyclin dependent kinase like 1
205200_at	2.31e-17	2.64e-19	-12.7861	33.5896	-2.3325	EXOSC7///CLEC3B	exosome component 7///C-type lectin domain family 3 member B
202200_s_at	2.32e-17	2.66e-19	12.7844	33.5833	0.777874	SRPK1	SRSF protein kinase 1
202808_at	2.32e-17	2.67e-19	-12.7834	33.5798	-0.649778	WBP1L	WW domain binding protein 1-like
221823_at	2.38e-17	2.74e-19	-12.776	33.5532	-1.10862	C5orf30	chromosome 5 open reading frame 30
205593_s_at	2.39e-17	2.76e-19	-12.7744	33.5474	-1.65065	PDE9A	phosphodiesterase 9A
223151_at	2.43e-17	2.81e-19	12.7695	33.5296	1.14422	DCUN1D5	defective in cullin neddylation 1 domain containing 5
204699_s_at	2.47e-17	2.86e-19	12.7646	33.512	0.824103	DIEXF	digestive organ expansion factor homolog (zebrafish)
240509_s_at	2.48e-17	2.87e-19	-12.7635	33.5082	-4.63694	GREM2	gremlin 2, DAN family BMP antagonist
230573_at	2.5e-17	2.9e-19	-12.7607	33.4979	-1.48399	SGK2	SGK2, serine/threonine kinase 2
219555_s_at	2.52e-17	2.92e-19	12.7582	33.4889	1.50199	CENPN	centromere protein N
223743_s_at	2.53e-17	2.94e-19	12.7561	33.4814	0.874548	MRPL4	mitochondrial ribosomal protein L4
214719_at	2.58e-17	3.01e-19	-12.7503	33.4604	-1.52915	SLC46A3	solute carrier family 46 member 3
227282_at	2.61e-17	3.05e-19	-12.7465	33.4468	-3.27182	PCDH19	protocadherin 19
204944_at	2.63e-17	3.08e-19	12.7439	33.4375	0.960142	PTPRG	protein tyrosine phosphatase, receptor type G
228754_at	2.63e-17	3.08e-19	12.7437	33.4365	2.45789	SLC6A6	solute carrier family 6 member 6
214264_s_at	2.66e-17	3.11e-19	12.7406	33.4255	1.173	EFCAB11	EF-hand calcium binding domain 11
227322_s_at	2.74e-17	3.22e-19	12.7317	33.3934	0.837549	BCCIP	BRCA2 and CDKN1A interacting protein
226594_at	2.74e-17	3.22e-19	-12.7316	33.393	-1.49686	ENTPD5	ectonucleoside triphosphate diphosphohydrolase 5
244050_at	2.74e-17	3.23e-19	-12.7305	33.3891	-1.38082	HACD4	3-hydroxyacyl-CoA dehydratase 4
201946_s_at	2.94e-17	3.47e-19	12.7106	33.3173	0.954248	CCT2	chaperonin containing TCP1 subunit 2
206978_at	2.95e-17	3.49e-19	-12.7097	33.3137	-1.91274	CCR2	C-C motif chemokine receptor 2
209199_s_at	2.95e-17	3.5e-19	-12.7088	33.3106	-1.72827	MEF2C	myocyte enhancer factor 2C
200014_s_at	3.06e-17	3.63e-19	12.6986	33.2737	0.747782	HNRNPC	heterogeneous nuclear ribonucleoprotein C (C1/C2)
208821_at	3.07e-17	3.64e-19	12.6979	33.2711	0.930431	SNRPB	small nuclear ribonucleoprotein polypeptides B and B1
209792_s_at	3.13e-17	3.72e-19	12.692	33.2498	5.16647	KLK10	kallikrein related peptidase 10
221276_s_at	3.13e-17	3.73e-19	-12.691	33.2461	-1.51276	SYNC	syncoilin, intermediate filament protein
218194_at	3.13e-17	3.74e-19	12.6906	33.2447	0.93531	REXO2	RNA exonuclease 2
211951_at	3.16e-17	3.78e-19	12.6875	33.2338	0.991548	NOLC1	nucleolar and coiled-body phosphoprotein 1
208937_s_at	3.22e-17	3.85e-19	12.6821	33.2139	1.22997	ID1	inhibitor of DNA binding 1, HLH protein
202680_at	3.22e-17	3.86e-19	12.6819	33.2133	0.895967	GTF2E2	general transcription factor IIE subunit 2
210534_s_at	3.28e-17	3.93e-19	12.6766	33.1942	1.39338	B9D1	B9 domain containing 1
234672_s_at	3.34e-17	4.02e-19	12.6706	33.1726	0.84743	NDC1	NDC1 transmembrane nucleoporin
204866_at	3.45e-17	4.15e-19	12.6616	33.1399	0.912257	JADE3	jade family PHD finger 3
1554930_a_at	3.47e-17	4.18e-19	12.6595	33.1325	1.17959	FUT8	fucosyltransferase 8
224448_s_at	3.53e-17	4.26e-19	12.6544	33.1139	1.02407	MIR3934///UQCC2	microRNA 3934///ubiquinol-cytochrome c reductase complex assembly factor 2
209633_at	3.53e-17	4.27e-19	-12.654	33.1125	-1.54452	PPP2R3A	protein phosphatase 2 regulatory subunit B''alpha
205392_s_at	3.56e-17	4.31e-19	-12.6513	33.1025	-1.95762	CCL15-CCL14///CCL14	CCL15-CCL14 readthrough (NMD candidate)///C-C motif chemokine ligand 14
212221_x_at	3.56e-17	4.32e-19	-12.651	33.1015	-0.954085	IDS	iduronate 2-sulfatase
214661_s_at	3.6e-17	4.38e-19	12.6471	33.0876	0.894678	NOP14	NOP14 nucleolar protein
225295_at	3.6e-17	4.38e-19	12.6467	33.086	1.23449	SLC39A10	solute carrier family 39 member 10
213506_at	3.77e-17	4.59e-19	-12.6338	33.0391	-0.962219	F2RL1	F2R like trypsin receptor 1
228774_at	3.86e-17	4.71e-19	12.6269	33.0141	0.971072	CEP78	centrosomal protein 78
43511_s_at	3.94e-17	4.81e-19	-12.6213	32.9941	-1.05981	ARRB1	arrestin beta 1
212423_at	4.1e-17	5.02e-19	-12.6095	32.9513	-1.54194	ZCCHC24	zinc finger CCHC-type containing 24
209295_at	4.26e-17	5.22e-19	12.5985	32.9114	1.16458	TNFRSF10B	TNF receptor superfamily member 10b
219669_at	4.28e-17	5.25e-19	-12.5973	32.907	-5.2687	CD177	CD177 molecule
209357_at	4.31e-17	5.29e-19	-12.5949	32.8982	-1.32324	CITED2	Cbp/p300 interacting transactivator with Glu/Asp rich carboxy-terminal domain 2
205975_s_at	4.34e-17	5.34e-19	-12.5926	32.8899	-1.6788	HOXD1	homeobox D1
212636_at	4.36e-17	5.38e-19	-12.5905	32.8824	-1.70126	QKI	QKI, KH domain containing RNA binding
229181_s_at	4.5e-17	5.55e-19	12.5818	32.8506	0.933275	HAUS2	HAUS augmin like complex subunit 2
201496_x_at	4.58e-17	5.67e-19	-12.5762	32.8304	-2.37136	MYH11	myosin heavy chain 11
205430_at	4.62e-17	5.72e-19	-12.5736	32.8209	-2.36834	BMP5	bone morphogenetic protein 5
213800_at	4.62e-17	5.73e-19	-12.5732	32.8195	-2.82943	CFH	complement factor H
226380_at	4.64e-17	5.77e-19	-12.5715	32.8132	-1.06777	PTPN21	protein tyrosine phosphatase, non-receptor type 21
204822_at	4.68e-17	5.83e-19	12.5687	32.8032	1.31922	TTK	TTK protein kinase
214437_s_at	4.8e-17	5.97e-19	12.5618	32.7781	1.34308	SHMT2	serine hydroxymethyltransferase 2
200972_at	4.82e-17	6.02e-19	-12.5596	32.7702	-0.800882	TSPAN3	tetraspanin 3
219165_at	4.82e-17	6.02e-19	-12.5596	32.77	-1.20877	PDLIM2	PDZ and LIM domain 2
225941_at	4.84e-17	6.06e-19	-12.5581	32.7646	-0.953029	EIF4E3	eukaryotic translation initiation factor 4E family member 3
204613_at	4.85e-17	6.07e-19	-12.5574	32.7621	-1.57528	PLCG2	phospholipase C gamma 2
43977_at	4.87e-17	6.11e-19	12.5555	32.755	0.748964	TMEM161A	transmembrane protein 161A
212724_at	4.89e-17	6.15e-19	-12.554	32.7498	-0.979581	RND3	Rho family GTPase 3
230183_at	5.02e-17	6.32e-19	-12.5465	32.7224	-1.13421	EXT1	exostosin glycosyltransferase 1
201843_s_at	5.05e-17	6.36e-19	-12.5448	32.7162	-2.16638	EFEMP1	EGF containing fibulin like extracellular matrix protein 1
213097_s_at	5.05e-17	6.38e-19	12.544	32.7133	0.866598	DNAJC2	DnaJ heat shock protein family (Hsp40) member C2
206898_at	5.06e-17	6.4e-19	-12.5431	32.7103	-3.28061	CDH19	cadherin 19
210541_s_at	5.17e-17	6.55e-19	12.5367	32.6868	0.832049	TRIM27	tripartite motif containing 27
204386_s_at	5.28e-17	6.69e-19	12.531	32.6661	0.626696	MRPL57	mitochondrial ribosomal protein L57
223307_at	5.31e-17	6.74e-19	12.5289	32.6586	1.28881	CDCA3	cell division cycle associated 3
202144_s_at	5.33e-17	6.78e-19	12.5272	32.6523	0.798622	ADSL	adenylosuccinate lyase
202900_s_at	5.39e-17	6.86e-19	12.5241	32.6411	0.724243	NUP88	nucleoporin 88
201111_at	5.5e-17	7.01e-19	12.5182	32.6198	1.00762	CSE1L	chromosome segregation 1 like
229127_at	5.55e-17	7.08e-19	-12.5154	32.6093	-2.23183	JAM2	junctional adhesion molecule 2
225202_at	5.55e-17	7.11e-19	12.5143	32.6053	1.29792	RHOBTB3	Rho related BTB domain containing 3
1558034_s_at	5.55e-17	7.11e-19	-12.5141	32.6048	-3.77007	CP	ceruloplasmin (ferroxidase)
38487_at	5.55e-17	7.12e-19	-12.5138	32.6036	-1.33629	STAB1	stabilin 1
228424_at	5.62e-17	7.21e-19	-12.5104	32.5911	-1.92563	NAALADL1	N-acetylated alpha-linked acidic dipeptidase-like 1
221677_s_at	5.81e-17	7.47e-19	12.5008	32.5562	1.10824	DONSON	downstream neighbor of SON
219797_at	5.85e-17	7.54e-19	-12.4983	32.547	-1.13686	MGAT4A	mannosyl (alpha-1,3-)-glycoprotein beta-1,4-N-acetylglucosaminyltransferase, isozyme A
208152_s_at	5.85e-17	7.54e-19	12.498	32.546	1.20327	DDX21	DEAD-box helicase 21
227561_at	6.26e-17	8.08e-19	-12.4794	32.4782	-1.20632	DDR2	discoidin domain receptor tyrosine kinase 2
213599_at	6.27e-17	8.11e-19	12.4782	32.4741	1.45078	OIP5	Opa interacting protein 5
227051_at	6.28e-17	8.13e-19	12.4776	32.4719	2.23669	BACE2	beta-site APP-cleaving enzyme 2
203755_at	6.58e-17	8.54e-19	12.4643	32.4232	1.35735	BUB1B	BUB1 mitotic checkpoint serine/threonine kinase B
202824_s_at	6.59e-17	8.55e-19	12.4637	32.4212	0.698161	TCEB1	transcription elongation factor B subunit 1
230914_at	6.71e-17	8.73e-19	-12.4582	32.4009	-1.35757	HNF4A	hepatocyte nuclear factor 4 alpha
201797_s_at	7e-17	9.12e-19	12.4464	32.3579	1.32345	VARS	valyl-tRNA synthetase
218982_s_at	7e-17	9.14e-19	12.4456	32.3553	0.839056	MRPS17	mitochondrial ribosomal protein S17
210735_s_at	7e-17	9.14e-19	-12.4455	32.3549	-1.21897	CA12	carbonic anhydrase 12
212430_at	7.06e-17	9.23e-19	-12.4429	32.3453	-1.18255	RBM38	RNA binding motif protein 38
225798_at	7.29e-17	9.54e-19	-12.4339	32.3125	-1.47313	JAZF1	JAZF zinc finger 1
228303_at	7.38e-17	9.68e-19	12.4299	32.2979	2.87927	GALNT6	polypeptide N-acetylgalactosaminyltransferase 6
227662_at	8.06e-17	1.06e-18	-12.4057	32.2095	-2.66425	SYNPO2	synaptopodin 2
205780_at	8.09e-17	1.06e-18	12.4043	32.2043	1.10106	BIK	BCL2 interacting killer
1564154_at	8.19e-17	1.08e-18	-12.4006	32.1911	-3.20277
1553976_a_at	8.24e-17	1.09e-18	12.3987	32.1838	0.962377	DPCD	deleted in primary ciliary dyskinesia homolog (mouse)
209964_s_at	8.4e-17	1.11e-18	-12.3929	32.163	-0.907226	ATXN7	ataxin 7
202095_s_at	8.7e-17	1.15e-18	12.3831	32.127	1.69573	BIRC5	baculoviral IAP repeat containing 5
210802_s_at	9.03e-17	1.2e-18	12.3725	32.0882	1.00874	DIMT1	DIM1 dimethyladenosine transferase 1 homolog
1555736_a_at	9.03e-17	1.2e-18	12.3719	32.0862	0.921265	AGTRAP	angiotensin II receptor associated protein
205259_at	9.03e-17	1.2e-18	-12.3717	32.0853	-1.4125	NR3C2	nuclear receptor subfamily 3 group C member 2
220486_x_at	9.24e-17	1.23e-18	-12.3649	32.0605	-0.746086	LOC101928589///TMEM164	uncharacterized LOC101928589///transmembrane protein 164
204955_at	9.24e-17	1.23e-18	-12.3648	32.0601	-1.57032	SRPX	sushi repeat containing protein, X-linked
1554483_at	9.29e-17	1.24e-18	-12.3628	32.0527	-1.61023	TMEM37	transmembrane protein 37
204034_at	9.42e-17	1.26e-18	-12.3586	32.0375	-0.942404	ETHE1	ETHE1, persulfide dioxygenase
205659_at	9.43e-17	1.26e-18	-12.3581	32.0354	-1.69981	HDAC9	histone deacetylase 9
36920_at	9.62e-17	1.29e-18	-12.3523	32.0145	-1.27529	MTM1	myotubularin 1
212479_s_at	9.73e-17	1.3e-18	-12.3488	32.0016	-0.872505	RMND5A	required for meiotic nuclear division 5 homolog A
1554466_a_at	1.01e-16	1.35e-18	12.3392	31.9666	1.27783	METTL26	methyltransferase like 26
213224_s_at	1.02e-16	1.37e-18	-12.3362	31.9555	-0.988398	BBIP1	BBSome interacting protein 1
209449_at	1.03e-16	1.38e-18	12.3334	31.9451	0.912524	LSM2	LSM2 homolog, U6 small nuclear RNA and mRNA degradation associated
219796_s_at	1.04e-16	1.4e-18	-12.3304	31.9343	-1.82667	CDHR5	cadherin related family member 5
211599_x_at	1.04e-16	1.41e-18	12.3277	31.9243	1.6957	MET	MET proto-oncogene, receptor tyrosine kinase
1564521_x_at	1.04e-16	1.41e-18	12.3273	31.9229	0.971148	PRMT5	protein arginine methyltransferase 5
225554_s_at	1.07e-16	1.45e-18	12.3194	31.894	0.772822	ANAPC7	anaphase promoting complex subunit 7
200615_s_at	1.07e-16	1.46e-18	12.319	31.8923	1.13318	AP2B1	adaptor related protein complex 2 beta 1 subunit
206577_at	1.08e-16	1.47e-18	-12.3169	31.8846	-4.40142	VIP	vasoactive intestinal peptide
218911_at	1.09e-16	1.48e-18	12.3152	31.8787	1.03247	YEATS4	YEATS domain containing 4
217997_at	1.09e-16	1.49e-18	12.3136	31.8727	2.16755	PHLDA1	pleckstrin homology like domain family A member 1
226462_at	1.1e-16	1.49e-18	12.3121	31.8671	1.27955	STXBP6	syntaxin binding protein 6
1554480_a_at	1.1e-16	1.5e-18	12.3115	31.865	0.836873	ARMC10	armadillo repeat containing 10
222695_s_at	1.1e-16	1.51e-18	12.3097	31.8585	2.32766	AXIN2	axin 2
225602_at	1.1e-16	1.51e-18	-12.3088	31.8551	-1.57058	GLIPR2	GLI pathogenesis related 2
204616_at	1.12e-16	1.54e-18	12.304	31.8376	0.674814	UCHL3	ubiquitin C-terminal hydrolase L3
200039_s_at	1.13e-16	1.55e-18	12.302	31.8301	0.690741	PSMB2	proteasome subunit beta 2
219087_at	1.16e-16	1.59e-18	-12.2948	31.8039	-3.03318	ASPN	asporin
213864_s_at	1.16e-16	1.6e-18	12.2937	31.7997	0.989386	NAP1L1	nucleosome assembly protein 1 like 1
210027_s_at	1.17e-16	1.61e-18	12.2919	31.7932	0.7542	APEX1	apurinic/apyrimidinic endodeoxyribonuclease 1
219000_s_at	1.23e-16	1.69e-18	12.2781	31.7426	1.45726	DSCC1	DNA replication and sister chromatid cohesion 1
207980_s_at	1.25e-16	1.73e-18	-12.2724	31.7215	-1.28301	CITED2	Cbp/p300 interacting transactivator with Glu/Asp rich carboxy-terminal domain 2
209714_s_at	1.26e-16	1.74e-18	12.2701	31.7133	1.4617	CDKN3	cyclin dependent kinase inhibitor 3
219304_s_at	1.29e-16	1.79e-18	-12.2637	31.6895	-1.54516	PDGFD	platelet derived growth factor D
218252_at	1.31e-16	1.82e-18	12.259	31.6724	1.13405	CKAP2	cytoskeleton associated protein 2
212607_at	1.34e-16	1.87e-18	-12.2516	31.6452	-1.49267	AKT3	AKT serine/threonine kinase 3
212226_s_at	1.34e-16	1.87e-18	-12.2512	31.6439	-1.16558	PLPP3	phospholipid phosphatase 3
224498_x_at	1.35e-16	1.88e-18	12.2503	31.6404	3.06288	AXIN2	axin 2
209170_s_at	1.35e-16	1.88e-18	-12.2502	31.6402	-3.3205	GPM6B	glycoprotein M6B
205395_s_at	1.37e-16	1.91e-18	12.2452	31.6218	0.928512	MRE11A	MRE11 homolog A, double strand break repair nuclease
208079_s_at	1.38e-16	1.92e-18	12.2436	31.6159	1.25721	AURKA	aurora kinase A
219666_at	1.38e-16	1.93e-18	-12.2425	31.612	-1.52612	MS4A6A	membrane spanning 4-domains A6A
209283_at	1.39e-16	1.95e-18	-12.2401	31.6031	-1.8444	CRYAB	crystallin alpha B
228355_s_at	1.4e-16	1.97e-18	12.2372	31.5922	0.828774	NDUFAF2	NADH:ubiquinone oxidoreductase complex assembly factor 2
234624_at	1.42e-16	2e-18	-12.2328	31.5764	-1.79872
223040_at	1.43e-16	2.01e-18	12.2317	31.5721	0.709412	NAA20	N(alpha)-acetyltransferase 20, NatB catalytic subunit
204284_at	1.45e-16	2.04e-18	-12.2282	31.5592	-1.67751	PPP1R3C	protein phosphatase 1 regulatory subunit 3C
219866_at	1.45e-16	2.05e-18	-12.2267	31.5538	-1.68564	CLIC5	chloride intracellular channel 5
208799_at	1.53e-16	2.16e-18	12.2124	31.5012	0.921373	PSMB5	proteasome subunit beta 5
205403_at	1.53e-16	2.16e-18	-12.2119	31.4993	-1.97346	IL1R2	interleukin 1 receptor type 2
200973_s_at	1.54e-16	2.19e-18	-12.2088	31.4879	-0.849672	TSPAN3	tetraspanin 3
234092_s_at	1.57e-16	2.22e-18	-12.2046	31.4725	-3.32059	TM6SF2	transmembrane 6 superfamily member 2
220030_at	1.58e-16	2.24e-18	-12.2018	31.4622	-1.52291	STYK1	serine/threonine/tyrosine kinase 1
212203_x_at	1.58e-16	2.24e-18	12.2018	31.4621	1.39411	IFITM3	interferon induced transmembrane protein 3
211742_s_at	1.58e-16	2.25e-18	-12.2007	31.4583	-1.80596	EVI2B	ecotropic viral integration site 2B
203501_at	1.61e-16	2.3e-18	-12.1954	31.4387	-1.36221	CPQ	carboxypeptidase Q
205407_at	1.61e-16	2.3e-18	-12.1951	31.4376	-1.871	RECK	reversion inducing cysteine rich protein with kazal motifs
204446_s_at	1.62e-16	2.31e-18	12.1935	31.4316	1.42969	ALOX5	arachidonate 5-lipoxygenase
200824_at	1.65e-16	2.36e-18	12.1882	31.4123	1.20056	GSTP1	glutathione S-transferase pi 1
223974_at	1.65e-16	2.36e-18	12.1879	31.4111	2.0939	DLGAP1-AS2	DLGAP1 antisense RNA 2
218529_at	1.71e-16	2.45e-18	12.1784	31.3763	1.07964	CD320	CD320 molecule
218706_s_at	1.71e-16	2.45e-18	-12.1781	31.375	-0.953589	GRAMD3	GRAM domain containing 3
200661_at	1.71e-16	2.45e-18	-12.1776	31.3734	-1.06343	CTSA	cathepsin A
218014_at	1.72e-16	2.47e-18	12.1757	31.3662	0.833206	NUP85	nucleoporin 85
220812_s_at	1.72e-16	2.48e-18	-12.1752	31.3645	-2.07849	HHLA2	HERV-H LTR-associating 2
228073_at	1.72e-16	2.48e-18	12.1742	31.3608	0.714234	NANP	N-acetylneuraminic acid phosphatase
232488_at	1.72e-16	2.49e-18	-12.1742	31.3606	-1.13522	PHYKPL	5-phosphohydroxy-L-lysine phospho-lyase
1554450_s_at	1.72e-16	2.49e-18	-12.1734	31.3578	-1.33408	MIER3	MIER family member 3
208985_s_at	1.73e-16	2.5e-18	12.1722	31.3535	0.685444	EIF3J	eukaryotic translation initiation factor 3 subunit J
204688_at	1.75e-16	2.54e-18	-12.1685	31.3399	-1.55942	SGCE	sarcoglycan epsilon
206102_at	1.76e-16	2.57e-18	12.1656	31.3291	1.33504	GINS1	GINS complex subunit 1
225258_at	1.76e-16	2.57e-18	-12.1656	31.3289	-0.909727	FBLIM1	filamin binding LIM protein 1
226303_at	1.77e-16	2.57e-18	-12.1649	31.3266	-2.0662	PGM5	phosphoglucomutase 5
228186_s_at	1.77e-16	2.58e-18	-12.1642	31.3239	-3.74029	RSPO3	R-spondin 3
212115_at	1.79e-16	2.61e-18	12.1612	31.313	0.87415	HN1L	hematological and neurological expressed 1 like
205290_s_at	1.79e-16	2.62e-18	-12.1602	31.3091	-1.13383	BMP2	bone morphogenetic protein 2
213911_s_at	1.79e-16	2.62e-18	12.1598	31.3077	0.751836	H2AFZ	H2A histone family member Z
223168_at	1.82e-16	2.67e-18	-12.1552	31.2907	-1.11827	RHOU	ras homolog family member U
203868_s_at	1.82e-16	2.68e-18	-12.1542	31.2871	-1.95536	VCAM1	vascular cell adhesion molecule 1
219777_at	1.83e-16	2.69e-18	-12.1533	31.2837	-1.65248	GIMAP6	GTPase, IMAP family member 6
213839_at	1.84e-16	2.71e-18	-12.1505	31.2736	-1.2564	CLMN	calmin
208836_at	1.85e-16	2.72e-18	-12.1496	31.27	-0.899719	ATP1B3	ATPase Na+/K+ transporting subunit beta 3
208726_s_at	1.86e-16	2.75e-18	12.147	31.2604	0.711905	EIF2S2	eukaryotic translation initiation factor 2 subunit beta
209642_at	1.86e-16	2.75e-18	12.1469	31.26	1.39513	BUB1	BUB1 mitotic checkpoint serine/threonine kinase
204875_s_at	1.89e-16	2.79e-18	12.1432	31.2463	1.15304	GMDS	GDP-mannose 4,6-dehydratase
223381_at	1.9e-16	2.81e-18	12.1412	31.2393	1.55451	NUF2	NUF2, NDC80 kinetochore complex component
231319_x_at	1.93e-16	2.86e-18	12.1367	31.2226	1.15585	KIF9	kinesin family member 9
218694_at	1.93e-16	2.86e-18	-12.1361	31.2205	-1.99641	ARMCX1	armadillo repeat containing, X-linked 1
213166_x_at	1.93e-16	2.86e-18	12.1359	31.2195	0.905534	MIR4784///MZT2A///MZT2B	microRNA 4784///mitotic spindle organizing protein 2A///mitotic spindle organizing protein 2B
243366_s_at	1.99e-16	2.96e-18	-12.1272	31.1876	-2.2449	ITGA4	integrin subunit alpha 4
205154_at	1.99e-16	2.96e-18	-12.1272	31.1875	-3.26442	LRRN2	leucine rich repeat neuronal 2
230269_at	2e-16	2.98e-18	-12.1248	31.1787	-4.44822	B3GALT5	beta-1,3-galactosyltransferase 5
200057_s_at	2.01e-16	3e-18	12.1237	31.1746	0.544151	NONO	non-POU domain containing, octamer-binding
234864_s_at	2.01e-16	3.01e-18	-12.1225	31.1701	-3.32013	TRPM6	transient receptor potential cation channel subfamily M member 6
218831_s_at	2.02e-16	3.02e-18	-12.1212	31.1655	-1.38045	FCGRT	Fc fragment of IgG receptor and transporter
222646_s_at	2.04e-16	3.06e-18	12.1182	31.1544	1.30171	ERO1A	endoplasmic reticulum oxidoreductase 1 alpha
225082_at	2.1e-16	3.14e-18	12.1109	31.1273	0.718135	CPSF3	cleavage and polyadenylation specific factor 3
1553977_a_at	2.13e-16	3.2e-18	12.1061	31.1097	1.08647	CYP39A1	cytochrome P450 family 39 subfamily A member 1
206070_s_at	2.13e-16	3.21e-18	-12.1055	31.1075	-3.79295	EPHA3	EPH receptor A3
201417_at	2.14e-16	3.22e-18	12.1041	31.1023	0.901007	SOX4	SRY-box 4
225940_at	2.16e-16	3.25e-18	-12.1019	31.094	-0.926927	EIF4E3	eukaryotic translation initiation factor 4E family member 3
215091_s_at	2.16e-16	3.26e-18	12.1009	31.0906	1.02913	GTF3A	general transcription factor IIIA
238075_at	2.2e-16	3.32e-18	12.0957	31.0714	1.2831	CHEK1	checkpoint kinase 1
223002_s_at	2.25e-16	3.4e-18	12.0896	31.0489	0.798198	XRN2	5'-3' exoribonuclease 2
204825_at	2.25e-16	3.4e-18	12.0893	31.0476	1.4173	MELK	maternal embryonic leucine zipper kinase
203214_x_at	2.27e-16	3.45e-18	12.086	31.0354	1.57181	CDK1	cyclin dependent kinase 1
218870_at	2.3e-16	3.5e-18	-12.0822	31.0215	-2.37112	LOC101928361///ARHGAP15	uncharacterized LOC101928361///Rho GTPase activating protein 15
222717_at	2.3e-16	3.5e-18	-12.0822	31.0215	-1.58088	SDPR	serum deprivation response
225866_at	2.34e-16	3.56e-18	12.077	31.0024	1.0077	RPF2	ribosome production factor 2 homolog
229741_at	2.35e-16	3.57e-18	-12.0762	30.9992	-0.89694	MAVS	mitochondrial antiviral signaling protein
201144_s_at	2.35e-16	3.59e-18	12.0749	30.9946	0.898414	EIF2S1	eukaryotic translation initiation factor 2 subunit alpha
227061_at	2.38e-16	3.64e-18	-12.0711	30.9806	-3.57228	LINC01279	long intergenic non-protein coding RNA 1279
202730_s_at	2.39e-16	3.65e-18	-12.0704	30.9777	-1.30382	MIR4680///PDCD4	microRNA 4680///programmed cell death 4 (neoplastic transformation inhibitor)
228053_s_at	2.39e-16	3.66e-18	12.0701	30.9768	0.859718	TOMM5	translocase of outer mitochondrial membrane 5
203764_at	2.42e-16	3.71e-18	12.0659	30.9612	1.60157	DLGAP5	DLG associated protein 5
228653_at	2.43e-16	3.73e-18	12.0647	30.9569	1.52647	SAMD5	sterile alpha motif domain containing 5
202589_at	2.46e-16	3.78e-18	12.0614	30.9447	1.52245	TYMS	thymidylate synthetase
213175_s_at	2.48e-16	3.82e-18	12.0582	30.933	0.961447	SNRPB	small nuclear ribonucleoprotein polypeptides B and B1
1554385_a_at	2.66e-16	4.1e-18	-12.0391	30.8623	-1.69013	PADI2	peptidyl arginine deiminase 2
200658_s_at	2.67e-16	4.11e-18	12.0386	30.8604	0.693253	PHB	prohibitin
212967_x_at	2.69e-16	4.15e-18	12.0357	30.8498	0.927903	NAP1L1	nucleosome assembly protein 1 like 1
219181_at	2.75e-16	4.25e-18	12.0298	30.8278	1.54868	LIPG	lipase G, endothelial type
211385_x_at	2.75e-16	4.25e-18	-12.0296	30.8272	-1.39885	SULT1A2	sulfotransferase family 1A member 2
207122_x_at	2.76e-16	4.28e-18	-12.0276	30.8195	-1.32707	SULT1A2	sulfotransferase family 1A member 2
1553764_a_at	2.77e-16	4.29e-18	12.0271	30.818	1.69756	AJUBA	ajuba LIM protein
206574_s_at	2.85e-16	4.42e-18	12.0188	30.7871	3.06053	PTP4A3	protein tyrosine phosphatase type IVA, member 3
201624_at	2.89e-16	4.5e-18	12.0145	30.7713	0.987299	DARS	aspartyl-tRNA synthetase
204962_s_at	2.91e-16	4.52e-18	12.0129	30.7654	1.60826	SLC35F6///CENPA	solute carrier family 35 member F6///centromere protein A
209129_at	2.92e-16	4.54e-18	12.0116	30.7604	1.66189	TRIP6	thyroid hormone receptor interactor 6
220688_s_at	2.95e-16	4.6e-18	12.0084	30.7487	1.13901	MRTO4	MRT4 homolog, ribosome maturation factor
223447_at	2.96e-16	4.62e-18	12.0073	30.7445	2.64266	REG4	regenerating family member 4
231849_at	3e-16	4.7e-18	12.0026	30.7271	3.18784	KRT80	keratin 80
212854_x_at	3e-16	4.7e-18	-12.0023	30.726	-1.22889	NBPF1	neuroblastoma breakpoint family member 1
220335_x_at	3.07e-16	4.82e-18	-11.9959	30.7022	-1.19986	CES3	carboxylesterase 3
203798_s_at	3.08e-16	4.84e-18	11.9948	30.6981	1.99436	VSNL1	visinin like 1
214214_s_at	3.08e-16	4.85e-18	11.9943	30.6965	0.789455	C1QBP	complement C1q binding protein
202130_at	3.09e-16	4.87e-18	-11.9932	30.6924	-0.884873	RIOK3	RIO kinase 3
220892_s_at	3.09e-16	4.87e-18	11.9929	30.6911	2.61628	PSAT1	phosphoserine aminotransferase 1
224252_s_at	3.14e-16	4.96e-18	11.9883	30.6741	1.58457	FXYD5	FXYD domain containing ion transport regulator 5
203951_at	3.15e-16	4.97e-18	-11.9878	30.6724	-2.80999	CNN1	calponin 1
204351_at	3.15e-16	4.99e-18	11.9867	30.6684	2.43577	S100P	S100 calcium binding protein P
200731_s_at	3.17e-16	5.01e-18	-11.9855	30.6637	-1.30013	PTP4A1	protein tyrosine phosphatase type IVA, member 1
208343_s_at	3.17e-16	5.01e-18	-11.9852	30.6626	-2.80681	NR5A2	nuclear receptor subfamily 5 group A member 2
223343_at	3.21e-16	5.09e-18	-11.9814	30.6484	-1.77899	MS4A7	membrane spanning 4-domains A7
202706_s_at	3.32e-16	5.27e-18	11.9718	30.6129	0.755761	UMPS	uridine monophosphate synthetase
209106_at	3.39e-16	5.39e-18	-11.9658	30.5907	-0.944324	NCOA1	nuclear receptor coactivator 1
200806_s_at	3.47e-16	5.52e-18	11.9592	30.5664	0.891198	HSPD1	heat shock protein family D (Hsp60) member 1
217768_at	3.49e-16	5.56e-18	11.9576	30.5604	0.593835	C14orf166	chromosome 14 open reading frame 166
206502_s_at	3.49e-16	5.56e-18	-11.9574	30.5596	-4.24318	INSM1	INSM transcriptional repressor 1
241706_at	3.55e-16	5.67e-18	-11.9521	30.54	-2.7165	CPNE8	copine 8
224810_s_at	3.55e-16	5.67e-18	-11.952	30.5395	-0.999135	ANKRD13A	ankyrin repeat domain 13A
204646_at	3.57e-16	5.71e-18	-11.9504	30.5335	-2.21795	DPYD	dihydropyrimidine dehydrogenase
239994_at	3.72e-16	5.96e-18	-11.9386	30.4899	-3.18908	B3GALT5	beta-1,3-galactosyltransferase 5
203017_s_at	3.72e-16	5.97e-18	11.9383	30.4887	1.04644	SSX2IP	SSX family member 2 interacting protein
201340_s_at	3.73e-16	6e-18	11.9372	30.4846	1.7988	ENC1	ectodermal-neural cortex 1
225623_at	3.76e-16	6.05e-18	-11.9347	30.4755	-0.865019	CIPC	CLOCK interacting pacemaker
201606_s_at	3.82e-16	6.14e-18	11.9307	30.4605	0.6431	PWP1	PWP1 homolog, endonuclein
205471_s_at	3.93e-16	6.33e-18	11.9226	30.4307	1.50205	DACH1	dachshund family transcription factor 1
211848_s_at	3.97e-16	6.41e-18	-11.9194	30.4188	-3.35155	CEACAM7	carcinoembryonic antigen related cell adhesion molecule 7
212521_s_at	3.99e-16	6.44e-18	-11.918	30.4135	-0.889407	PDE8A	phosphodiesterase 8A
202504_at	4.05e-16	6.54e-18	11.9139	30.3983	2.80215	TRIM29	tripartite motif containing 29
223922_x_at	4.05e-16	6.56e-18	-11.9131	30.3951	-1.26416	MS4A6A	membrane spanning 4-domains A6A
201670_s_at	4.18e-16	6.78e-18	-11.9043	30.3627	-1.09939	MARCKS	myristoylated alanine rich protein kinase C substrate
201075_s_at	4.29e-16	6.97e-18	11.897	30.3355	0.824688	SMARCC1	SWI/SNF related, matrix associated, actin dependent regulator of chromatin subfamily c member 1
226064_s_at	4.3e-16	6.98e-18	11.8964	30.3333	2.08256	DGAT2	diacylglycerol O-acyltransferase 2
201666_at	4.32e-16	7.03e-18	11.8946	30.3265	1.40563	TIMP1	TIMP metallopeptidase inhibitor 1
219267_at	4.36e-16	7.1e-18	-11.892	30.317	-0.926765	GLTP	glycolipid transfer protein
218039_at	4.43e-16	7.22e-18	11.8875	30.3002	1.2441	NUSAP1	nucleolar and spindle associated protein 1
201326_at	4.47e-16	7.3e-18	11.8845	30.2891	1.00609	CCT6A	chaperonin containing TCP1 subunit 6A
209105_at	4.5e-16	7.35e-18	-11.8828	30.2826	-0.990763	NCOA1	nuclear receptor coactivator 1
215657_at	4.5e-16	7.35e-18	-11.8826	30.2819	-4.45954	SLC26A3	solute carrier family 26 member 3
1555758_a_at	4.56e-16	7.46e-18	11.8788	30.2676	1.53216	CDKN3	cyclin dependent kinase inhibitor 3
229584_at	4.58e-16	7.51e-18	-11.8771	30.2613	-3.01656	LRRK2	leucine rich repeat kinase 2
225720_at	4.58e-16	7.51e-18	-11.8771	30.2613	-2.50508	SYNPO2	synaptopodin 2
226577_at	4.7e-16	7.73e-18	-11.8693	30.2326	-0.817395	PSEN1	presenilin 1
204023_at	4.79e-16	7.87e-18	11.8643	30.2137	1.01002	RFC4	replication factor C subunit 4
200709_at	4.85e-16	7.98e-18	-11.8606	30.2002	-0.864664	LOC101929368///FKBP1A	uncharacterized LOC101929368///FK506 binding protein 1A
230238_at	4.93e-16	8.13e-18	-11.8557	30.182	-1.54308	SOWAHA	sosondowah ankyrin repeat domain family member A
208337_s_at	5.12e-16	8.44e-18	-11.8457	30.1445	-2.08091	NR5A2	nuclear receptor subfamily 5 group A member 2
205242_at	5.14e-16	8.49e-18	-11.8442	30.1391	-5.27866	CXCL13	C-X-C motif chemokine ligand 13
227948_at	5.15e-16	8.52e-18	-11.8432	30.1351	-0.930927	FGD4	FYVE, RhoGEF and PH domain containing 4
214598_at	5.39e-16	8.93e-18	-11.8307	30.0888	-5.92638	CLDN8	claudin 8
200681_at	5.41e-16	8.97e-18	11.8296	30.0846	0.79432	GLO1	glyoxalase I
226386_at	5.49e-16	9.11e-18	11.8254	30.0689	0.698176	MALSU1	mitochondrial assembly of ribosomal large subunit 1
211955_at	5.73e-16	9.52e-18	11.8136	30.0249	0.786347	IPO5	importin 5
211991_s_at	5.86e-16	9.74e-18	-11.8075	30.0025	-1.73612	HLA-DPA1	major histocompatibility complex, class II, DP alpha 1
213617_s_at	5.98e-16	9.96e-18	11.8015	29.9802	1.03257	TPGS2	tubulin polyglutamylase complex subunit 2
1555950_a_at	6.03e-16	1.01e-17	11.7991	29.971	1.74956	CD55	CD55 molecule (Cromer blood group)
222606_at	6.16e-16	1.03e-17	11.7933	29.9496	0.889462	ZWILCH	zwilch kinetochore protein
223209_s_at	6.18e-16	1.03e-17	-11.7921	29.945	-0.666405	VIMP	VCP interacting membrane selenoprotein
213007_at	6.22e-16	1.04e-17	11.7901	29.9375	1.32202	FANCI	Fanconi anemia complementation group I
224753_at	6.29e-16	1.05e-17	11.7868	29.9253	1.26607	CDCA5	cell division cycle associated 5
212896_at	6.41e-16	1.07e-17	11.7812	29.9044	0.59957	SKIV2L2	Ski2 like RNA helicase 2
202664_at	6.47e-16	1.09e-17	-11.7785	29.8944	-1.48933	WIPF1	WAS/WASL interacting protein family member 1
203680_at	6.49e-16	1.09e-17	-11.7775	29.8903	-1.88858	PRKAR2B	protein kinase cAMP-dependent type II regulatory subunit beta
200995_at	6.52e-16	1.1e-17	11.7759	29.8845	0.720662	IPO7	importin 7
218889_at	6.53e-16	1.1e-17	11.7751	29.8817	1.04144	NOC3L	NOC3 like DNA replication regulator
218820_at	6.63e-16	1.12e-17	-11.7709	29.866	-1.92232	C14orf132	chromosome 14 open reading frame 132
223176_at	6.7e-16	1.13e-17	11.7679	29.8547	0.762482	KCTD20	potassium channel tetramerization domain containing 20
201468_s_at	6.83e-16	1.15e-17	11.7624	29.8341	1.68303	NQO1	NAD(P)H quinone dehydrogenase 1
212865_s_at	7e-16	1.18e-17	-11.7557	29.8093	-2.17541	COL14A1	collagen type XIV alpha 1 chain
203786_s_at	7.22e-16	1.22e-17	11.7471	29.7771	1.30861	TPD52L1	tumor protein D52-like 1
227249_at	7.35e-16	1.24e-17	11.7421	29.7584	1.16634	NDE1	nudE neurodevelopment protein 1
227117_at	7.42e-16	1.26e-17	11.7392	29.7474	1.02125	XPOT	exportin for tRNA
213088_s_at	7.5e-16	1.27e-17	11.736	29.7356	0.867864	DNAJC9	DnaJ heat shock protein family (Hsp40) member C9
244032_at	7.56e-16	1.28e-17	-11.7338	29.7274	-1.50109
225260_s_at	7.63e-16	1.3e-17	11.7309	29.7165	0.644917	MRPL32	mitochondrial ribosomal protein L32
201328_at	7.92e-16	1.35e-17	11.7209	29.6791	1.1282	ETS2	ETS proto-oncogene 2, transcription factor
204228_at	7.93e-16	1.35e-17	11.7201	29.6761	0.811149	PPIH	peptidylprolyl isomerase H
209711_at	7.95e-16	1.36e-17	-11.7191	29.6723	-0.778975	SLC35D1	solute carrier family 35 member D1
202954_at	7.95e-16	1.36e-17	11.719	29.6722	1.2575	UBE2C	ubiquitin conjugating enzyme E2 C
203658_at	8.07e-16	1.38e-17	-11.7144	29.6549	-0.963164	SLC25A20	solute carrier family 25 member 20
201338_x_at	8.07e-16	1.38e-17	11.7144	29.6549	0.985022	GTF3A	general transcription factor IIIA
215136_s_at	8.07e-16	1.38e-17	11.7142	29.654	0.943805	EXOSC8	exosome component 8
204128_s_at	8.07e-16	1.38e-17	11.7138	29.6527	1.45354	RFC3	replication factor C subunit 3
212379_at	8.11e-16	1.39e-17	11.7122	29.6467	1.23426	GART	phosphoribosylglycinamide formyltransferase, phosphoribosylglycinamide synthetase, phosphoribosylaminoimidazole synthetase
213068_at	8.19e-16	1.41e-17	-11.7092	29.6356	-3.09139	DPT	dermatopontin
200723_s_at	8.19e-16	1.41e-17	11.7089	29.6341	0.667759	CAPRIN1	cell cycle associated protein 1
218593_at	8.26e-16	1.42e-17	11.7065	29.6254	1.00102	RBM28	RNA binding motif protein 28
223655_at	8.29e-16	1.43e-17	-11.705	29.6198	-1.63994	CD163L1	CD163 molecule like 1
223096_at	8.3e-16	1.43e-17	11.7045	29.6178	0.852952	NOP58	NOP58 ribonucleoprotein
202805_s_at	8.38e-16	1.45e-17	11.7017	29.6072	1.17322	ABCC1	ATP binding cassette subfamily C member 1
204438_at	8.45e-16	1.46e-17	-11.6992	29.5981	-1.61118	MRC1	mannose receptor, C type 1
206030_at	8.45e-16	1.46e-17	-11.6989	29.597	-2.9287	ASPA	aspartoacylase
201539_s_at	8.5e-16	1.47e-17	-11.697	29.5897	-1.37879	FHL1	four and a half LIM domains 1
220432_s_at	8.59e-16	1.49e-17	11.6939	29.5781	1.49913	CYP39A1	cytochrome P450 family 39 subfamily A member 1
229481_at	8.78e-16	1.53e-17	11.6878	29.5555	3.20807	NKD1	naked cuticle homolog 1
201141_at	8.99e-16	1.56e-17	-11.6814	29.5315	-2.1501	GPNMB	glycoprotein nmb
219258_at	9.1e-16	1.58e-17	11.6779	29.5184	1.17116	TIPIN	TIMELESS interacting protein
229545_at	9.17e-16	1.6e-17	11.6756	29.5096	1.09029	FERMT1	fermitin family member 1
211372_s_at	9.33e-16	1.63e-17	-11.6708	29.4916	-2.04613	IL1R2	interleukin 1 receptor type 2
215185_at	9.43e-16	1.65e-17	11.6676	29.4798	2.84593	LINC00963	long intergenic non-protein coding RNA 963
201485_s_at	9.55e-16	1.67e-17	11.6639	29.4659	0.871893	RCN2	reticulocalbin 2
204768_s_at	9.67e-16	1.69e-17	11.6603	29.4525	1.25452	FEN1	flap structure-specific endonuclease 1
212930_at	9.85e-16	1.73e-17	-11.6552	29.4333	-1.19225	ATP2B1	ATPase plasma membrane Ca2+ transporting 1
211297_s_at	9.85e-16	1.73e-17	11.6549	29.4322	0.884767	CDK7	cyclin dependent kinase 7
222077_s_at	9.87e-16	1.73e-17	11.6541	29.4292	1.20485	RACGAP1	Rac GTPase activating protein 1
233269_at	9.88e-16	1.74e-17	-11.6531	29.4255	-2.20644
224761_at	9.88e-16	1.74e-17	-11.6531	29.4255	-0.79437	GNA13	G protein subunit alpha 13
219363_s_at	9.98e-16	1.76e-17	11.6503	29.4149	0.863299	MTERF3	mitochondrial transcription termination factor 3
207761_s_at	1e-15	1.77e-17	-11.6486	29.4086	-1.43826	METTL7A	methyltransferase like 7A
202283_at	1.01e-15	1.78e-17	-11.6469	29.4022	-1.40854	SERPINF1	serpin family F member 1
203166_at	1.02e-15	1.81e-17	-11.6432	29.3885	-0.895001	CFDP1	craniofacial development protein 1
217884_at	1.02e-15	1.81e-17	11.6428	29.3868	0.92871	NAT10	N-acetyltransferase 10
218001_at	1.03e-15	1.83e-17	11.6395	29.3744	0.846511	MRPS2	mitochondrial ribosomal protein S2
228507_at	1.04e-15	1.85e-17	-11.637	29.3652	-2.65001	PDE3A	phosphodiesterase 3A
233882_s_at	1.05e-15	1.87e-17	-11.6345	29.3557	-3.01884	SEMA6D	semaphorin 6D
203856_at	1.06e-15	1.89e-17	11.6312	29.3435	1.13844	VRK1	vaccinia related kinase 1
1554485_s_at	1.07e-15	1.9e-17	-11.6292	29.336	-2.02258	TMEM37	transmembrane protein 37
213416_at	1.08e-15	1.92e-17	-11.6266	29.3262	-1.47277	ITGA4	integrin subunit alpha 4
210139_s_at	1.08e-15	1.93e-17	-11.6253	29.3212	-1.59887	PMP22	peripheral myelin protein 22
223331_s_at	1.08e-15	1.93e-17	11.625	29.3201	0.794656	DDX20	DEAD-box helicase 20
212760_at	1.09e-15	1.94e-17	-11.6236	29.3149	-0.77076	UBR2	ubiquitin protein ligase E3 component n-recognin 2
202619_s_at	1.09e-15	1.95e-17	-11.6227	29.3116	-1.74044	PLOD2	procollagen-lysine,2-oxoglutarate 5-dioxygenase 2
219588_s_at	1.09e-15	1.96e-17	11.622	29.3089	1.28269	NCAPG2	non-SMC condensin II complex subunit G2
201926_s_at	1.09e-15	1.96e-17	11.6216	29.3075	1.7788	CD55	CD55 molecule (Cromer blood group)
1553808_a_at	1.11e-15	1.99e-17	-11.6178	29.2931	-2.16776	NKX2-3	NK2 homeobox 3
225651_at	1.12e-15	2.02e-17	-11.6141	29.2791	-1.42062	UBE2E2	ubiquitin conjugating enzyme E2 E2
225150_s_at	1.14e-15	2.05e-17	11.6097	29.2627	0.993713	RTKN	rhotekin
222685_at	1.15e-15	2.07e-17	11.6075	29.2546	1.01354	HAUS6	HAUS augmin like complex subunit 6
206149_at	1.16e-15	2.09e-17	-11.6049	29.2448	-3.34816	CHP2	calcineurin like EF-hand protein 2
214011_s_at	1.16e-15	2.09e-17	11.6048	29.2445	0.978958	NOP16	NOP16 nucleolar protein
236471_at	1.17e-15	2.1e-17	11.6025	29.2359	2.29632	NFE2L3	nuclear factor, erythroid 2 like 3
227653_at	1.19e-15	2.14e-17	11.5981	29.2191	0.703462	TRMT5	tRNA methyltransferase 5
225576_at	1.19e-15	2.15e-17	-11.5971	29.2154	-0.776455	GINM1	glycoprotein integral membrane 1
219607_s_at	1.2e-15	2.17e-17	-11.5947	29.2065	-1.8026	MS4A4A	membrane spanning 4-domains A4A
204767_s_at	1.21e-15	2.19e-17	11.592	29.1964	1.46157	FEN1	flap structure-specific endonuclease 1
1555724_s_at	1.22e-15	2.21e-17	-11.5901	29.1893	-1.57781	TAGLN	transgelin
218497_s_at	1.25e-15	2.27e-17	11.583	29.1627	0.745827	RNASEH1	ribonuclease H1
224839_s_at	1.25e-15	2.27e-17	11.5825	29.1608	1.58062	GPT2	glutamic--pyruvic transaminase 2
236001_at	1.26e-15	2.29e-17	-11.5803	29.1525	-0.903913	LINC00675	long intergenic non-protein coding RNA 675
218792_s_at	1.26e-15	2.3e-17	11.5794	29.1491	0.961423	BSPRY	B-box and SPRY domain containing
203316_s_at	1.27e-15	2.31e-17	11.5779	29.1435	0.74617	SNRPE	small nuclear ribonucleoprotein polypeptide E
209161_at	1.27e-15	2.31e-17	11.5776	29.1424	0.814315	PRPF4	pre-mRNA processing factor 4
210052_s_at	1.27e-15	2.32e-17	11.5767	29.1389	1.35543	TPX2	TPX2, microtubule nucleation factor
210046_s_at	1.28e-15	2.33e-17	11.5755	29.1346	1.0442	IDH2	isocitrate dehydrogenase (NADP(+)) 2, mitochondrial
203721_s_at	1.29e-15	2.37e-17	11.5712	29.1184	0.749028	UTP18	UTP18, small subunit processome component
1554572_a_at	1.3e-15	2.38e-17	11.5705	29.1155	1.14621	SUV39H2	suppressor of variegation 3-9 homolog 2
223551_at	1.3e-15	2.39e-17	-11.5693	29.1111	-2.70809	PKIB	protein kinase (cAMP-dependent, catalytic) inhibitor beta
201787_at	1.32e-15	2.43e-17	-11.5646	29.0933	-2.78677	FBLN1	fibulin 1
202870_s_at	1.33e-15	2.44e-17	11.5638	29.0905	1.44398	CDC20	cell division cycle 20
208753_s_at	1.33e-15	2.44e-17	11.5629	29.0872	0.976859	NAP1L1	nucleosome assembly protein 1 like 1
205776_at	1.37e-15	2.52e-17	-11.5552	29.058	-1.30706	FMO5	flavin containing monooxygenase 5
201323_at	1.37e-15	2.52e-17	11.5551	29.0579	0.911404	MIR6733///EBNA1BP2	microRNA 6733///EBNA1 binding protein 2
202107_s_at	1.37e-15	2.52e-17	11.5549	29.0571	1.38273	MCM2	minichromosome maintenance complex component 2
206429_at	1.39e-15	2.57e-17	-11.5494	29.0363	-0.978091	F2RL1	F2R like trypsin receptor 1
203296_s_at	1.4e-15	2.59e-17	-11.5474	29.0287	-2.92949	ATP1A2	ATPase Na+/K+ transporting subunit alpha 2
202759_s_at	1.41e-15	2.61e-17	-11.5451	29.0201	-1.26055	PALM2-AKAP2///AKAP2	PALM2-AKAP2 readthrough///A-kinase anchoring protein 2
209317_at	1.41e-15	2.62e-17	11.545	29.0198	0.879886	POLR1C	RNA polymerase I subunit C
225355_at	1.42e-15	2.63e-17	-11.5432	29.013	-1.1613	NEURL1B	neuralized E3 ubiquitin protein ligase 1B
202724_s_at	1.42e-15	2.64e-17	-11.5427	29.0111	-1.01612	FOXO1	forkhead box O1
1554667_s_at	1.44e-15	2.67e-17	11.5397	29	0.79615	METTL8	methyltransferase like 8
213261_at	1.44e-15	2.67e-17	-11.5397	28.9999	-1.41738	TRANK1	tetratricopeptide repeat and ankyrin repeat containing 1
204035_at	1.44e-15	2.69e-17	-11.5378	28.9927	-3.64609	SCG2	secretogranin II
212627_s_at	1.47e-15	2.73e-17	11.5334	28.9763	0.860826	EXOSC7	exosome component 7
202350_s_at	1.48e-15	2.76e-17	-11.5307	28.9662	-1.79241	LOC100506558///MATN2	uncharacterized LOC100506558///matrilin 2
218755_at	1.62e-15	3.03e-17	11.5064	28.8747	1.38845	KIF20A	kinesin family member 20A
209421_at	1.62e-15	3.04e-17	11.5056	28.8716	0.86907	MSH2	mutS homolog 2
205499_at	1.62e-15	3.04e-17	11.5056	28.8716	2.70804	SRPX2	sushi repeat containing protein, X-linked 2
217942_at	1.63e-15	3.04e-17	11.505	28.8693	0.560521	MRPS35	mitochondrial ribosomal protein S35
202483_s_at	1.64e-15	3.07e-17	11.5027	28.8608	1.01991	RANBP1	RAN binding protein 1
241703_at	1.67e-15	3.13e-17	-11.4976	28.8417	-2.45429	RUNDC3B	RUN domain containing 3B
225242_s_at	1.7e-15	3.2e-17	-11.4918	28.8196	-2.14051	CCDC80	coiled-coil domain containing 80
205393_s_at	1.71e-15	3.21e-17	11.4911	28.8169	1.39847	CHEK1	checkpoint kinase 1
242733_at	1.75e-15	3.3e-17	-11.4836	28.7889	-2.68671
221689_s_at	1.75e-15	3.3e-17	11.4834	28.7879	0.874996	PIGP	phosphatidylinositol glycan anchor biosynthesis class P
226488_at	1.76e-15	3.32e-17	11.482	28.7827	0.808661	RCCD1	RCC1 domain containing 1
232072_at	1.78e-15	3.35e-17	-11.4794	28.7729	-1.64174	NAAA	N-acylethanolamine acid amidase
64064_at	1.79e-15	3.38e-17	-11.4771	28.7643	-1.03366	GIMAP1-GIMAP5///GIMAP5	GIMAP1-GIMAP5 readthrough///GTPase, IMAP family member 5
218882_s_at	1.84e-15	3.48e-17	11.4694	28.7353	0.840847	WDR3	WD repeat domain 3
227478_at	1.87e-15	3.53e-17	-11.4655	28.7208	-2.48795	SETBP1	SET binding protein 1
218123_at	1.87e-15	3.54e-17	11.4647	28.7177	0.867581	C21orf59	chromosome 21 open reading frame 59
228547_at	1.88e-15	3.57e-17	-11.4629	28.7106	-3.27865	NRXN1	neurexin 1
219493_at	1.9e-15	3.6e-17	11.4606	28.7023	1.72407	SHCBP1	SHC binding and spindle associated 1
236300_at	1.91e-15	3.62e-17	-11.459	28.6961	-2.50874	PDE3A	phosphodiesterase 3A
223516_s_at	1.92e-15	3.65e-17	11.4572	28.6894	0.718823	TOMM6///PRICKLE4	translocase of outer mitochondrial membrane 6///prickle planar cell polarity protein 4
232431_at	1.92e-15	3.66e-17	-11.4562	28.6856	-2.99632	NR3C1	nuclear receptor subfamily 3 group C member 1
228831_s_at	1.93e-15	3.67e-17	-11.4556	28.6832	-1.26574	GNG7	G protein subunit gamma 7
213008_at	1.93e-15	3.68e-17	11.4546	28.6796	1.55417	FANCI	Fanconi anemia complementation group I
229254_at	1.93e-15	3.68e-17	-11.4545	28.6791	-2.51457	MFSD4A	major facilitator superfamily domain containing 4A
213129_s_at	1.95e-15	3.72e-17	11.4519	28.6695	0.844685	LOC101060817///GCSH	glycine cleavage system H protein, mitochondrial-like///glycine cleavage system protein H
226084_at	1.95e-15	3.72e-17	-11.4516	28.6682	-1.79571	MAP1B	microtubule associated protein 1B
204088_at	1.98e-15	3.78e-17	-11.4475	28.653	-0.962123	P2RX4	purinergic receptor P2X 4
235456_at	1.99e-15	3.81e-17	-11.4454	28.645	-1.78849
207607_at	1.99e-15	3.81e-17	11.4453	28.6443	3.91093	ASCL2	achaete-scute family bHLH transcription factor 2
211776_s_at	2.01e-15	3.86e-17	-11.4422	28.6329	-2.1495	EPB41L3	erythrocyte membrane protein band 4.1 like 3
201426_s_at	2.01e-15	3.86e-17	-11.442	28.632	-1.29384	VIM	vimentin
200843_s_at	2.02e-15	3.88e-17	11.4409	28.6277	0.679353	EPRS	glutamyl-prolyl-tRNA synthetase
225901_at	2.07e-15	3.98e-17	11.434	28.602	0.847262	PTPMT1	protein tyrosine phosphatase, mitochondrial 1
201427_s_at	2.07e-15	3.99e-17	-11.4335	28.5999	-1.10754	SEPP1	selenoprotein P, plasma, 1
220026_at	2.1e-15	4.05e-17	-11.4297	28.5857	-5.26382	CLCA4	chloride channel accessory 4
218182_s_at	2.15e-15	4.16e-17	11.4225	28.5585	3.2949	CLDN1	claudin 1
208770_s_at	2.23e-15	4.3e-17	-11.4135	28.5247	-0.690393	EIF4EBP2	eukaryotic translation initiation factor 4E binding protein 2
204126_s_at	2.25e-15	4.35e-17	11.4106	28.5136	1.86266	CDC45	cell division cycle 45
202948_at	2.3e-15	4.45e-17	-11.4048	28.4918	-1.1227	IL1R1	interleukin 1 receptor type 1
223369_at	2.32e-15	4.49e-17	11.4022	28.482	1.0177	NTMT1	N-terminal Xaa-Pro-Lys N-methyltransferase 1
209485_s_at	2.33e-15	4.52e-17	-11.4004	28.4749	-1.21162	OSBPL1A	oxysterol binding protein like 1A
1552362_a_at	2.33e-15	4.53e-17	-11.4	28.4737	-1.53678	LEAP2	liver enriched antimicrobial peptide 2
228716_at	2.34e-15	4.55e-17	-11.3986	28.4681	-2.43637	THRB	thyroid hormone receptor beta
230729_at	2.37e-15	4.6e-17	-11.3957	28.4573	-1.32477
216212_s_at	2.39e-15	4.65e-17	11.3931	28.4476	1.09304	MIR664B///SNORA56///DKC1	microRNA 664b///small nucleolar RNA, H/ACA box 56///dyskerin pseudouridine synthase 1
223700_at	2.42e-15	4.7e-17	11.39	28.4356	1.35639	MND1	meiotic nuclear divisions 1
225464_at	2.43e-15	4.74e-17	-11.3879	28.4278	-1.6534	FRMD6	FERM domain containing 6
206363_at	2.48e-15	4.83e-17	-11.3828	28.4084	-1.94716	MAF	MAF bZIP transcription factor
219032_x_at	2.55e-15	4.98e-17	-11.3751	28.3794	-1.24166	OPN3	opsin 3
203125_x_at	2.55e-15	4.99e-17	11.3742	28.3762	1.17316	SLC11A2	solute carrier family 11 member 2
202525_at	2.58e-15	5.05e-17	-11.3712	28.3649	-1.03504	PRSS8	protease, serine 8
212330_at	2.59e-15	5.07e-17	11.3701	28.3606	0.728675	TFDP1	transcription factor Dp-1
222848_at	2.61e-15	5.13e-17	11.3673	28.3502	1.56132	CENPK	centromere protein K
217445_s_at	2.65e-15	5.19e-17	11.3641	28.3377	1.22183	GART	phosphoribosylglycinamide formyltransferase, phosphoribosylglycinamide synthetase, phosphoribosylaminoimidazole synthetase
201195_s_at	2.66e-15	5.22e-17	11.3625	28.3319	2.30442	SLC7A5	solute carrier family 7 member 5
1568639_a_at	2.68e-15	5.27e-17	11.3599	28.322	2.7159	GATA2-AS1	GATA2 antisense RNA 1
219728_at	2.69e-15	5.29e-17	-11.359	28.3184	-3.16199	MYOT	myotilin
218766_s_at	2.71e-15	5.33e-17	11.3569	28.3106	0.872552	WARS2	tryptophanyl tRNA synthetase 2, mitochondrial
206377_at	2.71e-15	5.35e-17	-11.3563	28.3084	-1.28146	FOXF2	forkhead box F2
1563111_a_at	2.71e-15	5.35e-17	11.3561	28.3076	0.769923	PIGX	phosphatidylinositol glycan anchor biosynthesis class X
239845_at	2.74e-15	5.41e-17	-11.3534	28.2974	-1.31618
209709_s_at	2.76e-15	5.45e-17	11.3513	28.2896	1.31043	HMMR	hyaluronan mediated motility receptor
225300_at	2.8e-15	5.54e-17	11.3468	28.2726	0.911697	KNSTRN	kinetochore localized astrin/SPAG5 binding protein
226818_at	2.8e-15	5.55e-17	-11.3464	28.2708	-1.48498	MPEG1	macrophage expressed 1
210283_x_at	2.81e-15	5.57e-17	11.3454	28.2672	0.602671	PAIP1	poly(A) binding protein interacting protein 1
204480_s_at	2.89e-15	5.74e-17	11.3375	28.2374	1.03528	C9orf16	chromosome 9 open reading frame 16
210466_s_at	2.95e-15	5.85e-17	11.3326	28.2189	0.998072	SERBP1	SERPINE1 mRNA binding protein 1
227623_at	2.95e-15	5.87e-17	-11.3316	28.2152	-1.80867	CACNA2D1	calcium voltage-gated channel auxiliary subunit alpha2delta 1
201571_s_at	2.97e-15	5.92e-17	11.3296	28.2076	0.850155	DCTD	dCMP deaminase
222912_at	3.02e-15	6.01e-17	-11.3254	28.1916	-0.925722	ARRB1	arrestin beta 1
218788_s_at	3.04e-15	6.06e-17	11.3234	28.184	0.671289	SMYD3	SET and MYND domain containing 3
200620_at	3.05e-15	6.08e-17	-11.3224	28.18	-0.551713	TMEM59	transmembrane protein 59
227153_at	3.07e-15	6.13e-17	11.3202	28.1718	1.02287	IMMP2L	inner mitochondrial membrane peptidase subunit 2
205632_s_at	3.07e-15	6.14e-17	-11.32	28.1712	-0.908894	PIP5K1B	phosphatidylinositol-4-phosphate 5-kinase type 1 beta
224963_at	3.08e-15	6.15e-17	-11.3193	28.1685	-3.37213	SLC26A2	solute carrier family 26 member 2
230398_at	3.15e-15	6.31e-17	11.3126	28.1432	2.45813	TNS4	tensin 4
206385_s_at	3.18e-15	6.38e-17	-11.3098	28.1325	-1.29003	ANK3	ankyrin 3, node of Ranvier (ankyrin G)
222748_s_at	3.21e-15	6.45e-17	11.307	28.122	0.76038	TXNL4B	thioredoxin like 4B
201092_at	3.21e-15	6.45e-17	11.307	28.1217	0.626502	RBBP7	RB binding protein 7, chromatin remodeling factor
201866_s_at	3.22e-15	6.47e-17	-11.306	28.1183	-1.89895	NR3C1	nuclear receptor subfamily 3 group C member 1
227642_at	3.22e-15	6.48e-17	-11.3057	28.117	-1.28302	TFCP2L1	transcription factor CP2-like 1
210548_at	3.25e-15	6.54e-17	-11.3033	28.1079	-3.97976	CCL23	C-C motif chemokine ligand 23
227059_at	3.25e-15	6.55e-17	-11.303	28.1067	-2.27929	GPC6	glypican 6
208716_s_at	3.25e-15	6.56e-17	-11.3027	28.1055	-0.768675	TMCO1	transmembrane and coiled-coil domains 1
210768_x_at	3.28e-15	6.62e-17	-11.3003	28.0964	-1.0539	TMCO1	transmembrane and coiled-coil domains 1
206093_x_at	3.28e-15	6.62e-17	-11.3	28.0954	-2.58325	TNXB///TNXA	tenascin XB///tenascin XA (pseudogene)
206404_at	3.32e-15	6.72e-17	-11.2963	28.0813	-2.23222	FGF9	fibroblast growth factor 9
227969_at	3.33e-15	6.75e-17	-11.2951	28.0767	-1.4001	PCBP1-AS1	PCBP1 antisense RNA 1
223159_s_at	3.35e-15	6.78e-17	11.2939	28.0722	0.936982	NEK6	NIMA related kinase 6
211954_s_at	3.35e-15	6.8e-17	11.2929	28.0685	0.757855	IPO5	importin 5
212846_at	3.39e-15	6.87e-17	11.2903	28.0587	0.73217	RRP1B	ribosomal RNA processing 1B
219911_s_at	3.41e-15	6.93e-17	11.288	28.0497	1.71182	SLCO4A1	solute carrier organic anion transporter family member 4A1
222453_at	3.5e-15	7.12e-17	-11.2809	28.023	-2.02141	CYBRD1	cytochrome b reductase 1
209589_s_at	3.53e-15	7.18e-17	11.2789	28.0153	1.51256	EPHB2	EPH receptor B2
226519_s_at	3.54e-15	7.22e-17	-11.2774	28.0096	-0.926314	PHYKPL	5-phosphohydroxy-L-lysine phospho-lyase
238021_s_at	3.58e-15	7.31e-17	11.2742	27.9977	3.77117	CRNDE	colorectal neoplasia differentially expressed (non-protein coding)
228750_at	3.64e-15	7.42e-17	-11.2701	27.9821	-2.98891	COL14A1	collagen type XIV alpha 1 chain
212730_at	3.67e-15	7.5e-17	-11.2675	27.9723	-1.71846	SYNM	synemin
205909_at	3.68e-15	7.52e-17	11.2667	27.9692	1.17547	POLE2	DNA polymerase epsilon 2, accessory subunit
201572_x_at	3.73e-15	7.64e-17	11.2626	27.9537	0.726726	DCTD	dCMP deaminase
212196_at	3.79e-15	7.76e-17	-11.2585	27.9381	-0.99246	IL6ST	interleukin 6 signal transducer
205524_s_at	3.82e-15	7.84e-17	-11.2557	27.9275	-2.83365	HAPLN1	hyaluronan and proteoglycan link protein 1
203712_at	3.83e-15	7.85e-17	11.2553	27.9259	0.81474	PUM3	pumilio RNA binding family member 3
201527_at	3.85e-15	7.91e-17	11.2534	27.9188	0.882373	LOC101927180///ATP6V1F	V-type proton ATPase subunit F pseudogene///ATPase H+ transporting V1 subunit F
203409_at	3.86e-15	7.94e-17	11.2524	27.9149	1.37079	DDB2	damage specific DNA binding protein 2
203542_s_at	3.93e-15	8.08e-17	-11.2479	27.8979	-1.09982	KLF9	Kruppel like factor 9
1552316_a_at	3.94e-15	8.12e-17	-11.2466	27.8929	-1.54452	GIMAP1	GTPase, IMAP family member 1
206121_at	3.94e-15	8.13e-17	-11.2462	27.8914	-2.6971	AMPD1	adenosine monophosphate deaminase 1
223100_s_at	3.95e-15	8.14e-17	11.2458	27.89	0.865211	NUDT5	nudix hydrolase 5
225498_at	3.95e-15	8.16e-17	-11.2453	27.8878	-0.592859	CHMP4B	charged multivesicular body protein 4B
227190_at	3.96e-15	8.19e-17	-11.2443	27.8843	-1.68207	TMEM37	transmembrane protein 37
202266_at	3.98e-15	8.25e-17	-11.2425	27.8772	-0.869586	TDP2	tyrosyl-DNA phosphodiesterase 2
212815_at	3.98e-15	8.25e-17	11.2424	27.8768	1.05319	ASCC3	activating signal cointegrator 1 complex subunit 3
211144_x_at	4e-15	8.28e-17	-11.2414	27.8732	-2.00011	TARP///TRGV9///TRGC2	TCR gamma alternate reading frame protein///T cell receptor gamma variable 9///T cell receptor gamma constant 2
203485_at	4.03e-15	8.35e-17	-11.2392	27.8647	-2.41536	RTN1	reticulon 1
206097_at	4.03e-15	8.36e-17	-11.2387	27.8631	-1.5373	SLC22A18AS	solute carrier family 22 member 18 antisense
209861_s_at	4.13e-15	8.58e-17	11.2322	27.8381	0.604883	METAP2	methionyl aminopeptidase 2
205828_at	4.23e-15	8.8e-17	11.2254	27.8125	4.29992	MMP3	matrix metallopeptidase 3
207949_s_at	4.25e-15	8.84e-17	11.2242	27.808	0.992752	ICA1	islet cell autoantigen 1
211990_at	4.25e-15	8.85e-17	-11.2241	27.8074	-1.38907	HLA-DPA1	major histocompatibility complex, class II, DP alpha 1
217873_at	4.28e-15	8.92e-17	-11.2218	27.7987	-0.598046	CAB39	calcium binding protein 39
229568_at	4.38e-15	9.14e-17	-11.2155	27.7749	-1.02241	MOB3B	MOB kinase activator 3B
226287_at	4.41e-15	9.2e-17	11.2137	27.768	0.852033	CCDC34	coiled-coil domain containing 34
219253_at	4.41e-15	9.23e-17	11.213	27.7654	0.862241	TMEM185B	transmembrane protein 185B
221580_s_at	4.41e-15	9.23e-17	11.213	27.7653	1.01738	MIR1304///SNORD5///SNORA32///SNORA40///SNORA18///SNORA1///SNORA8///TAF1D	microRNA 1304///small nucleolar RNA, C/D box 5///small nucleolar RNA, H/ACA box 32///small nucleolar RNA, H/ACA box 40///small nucleolar RNA, H/ACA box 18///small nucleolar RNA, H/ACA box 1///small nucleolar RNA, H/ACA box 8///TATA-box binding protein associated factor, RNA polymerase I subunit D
224824_at	4.49e-15	9.41e-17	11.2078	27.7456	0.948225	COX20	COX20, cytochrome c oxidase assembly factor
204655_at	4.49e-15	9.42e-17	-11.2077	27.7453	-1.95762	CCL5	C-C motif chemokine ligand 5
233801_s_at	4.55e-15	9.55e-17	-11.2041	27.7315	-2.76673	SEMA6D	semaphorin 6D
204447_at	4.58e-15	9.61e-17	11.2025	27.7254	2.06783	LZTS3	leucine zipper tumor suppressor family member 3
203011_at	4.63e-15	9.73e-17	-11.199	27.7124	-0.847934	IMPA1	inositol monophosphatase 1
225835_at	4.63e-15	9.75e-17	11.1986	27.7108	1.03286	SLC12A2	solute carrier family 12 member 2
230323_s_at	4.66e-15	9.82e-17	-11.1968	27.7039	-1.14702	TMEM45B	transmembrane protein 45B
203270_at	4.7e-15	9.89e-17	11.1948	27.6961	1.5364	DTYMK	deoxythymidylate kinase
221091_at	4.72e-15	9.95e-17	-11.1932	27.6902	-5.75013	INSL5	insulin like 5
212049_at	4.74e-15	1e-16	-11.1918	27.6848	-0.627738	WIPF2	WAS/WASL interacting protein family member 2
234992_x_at	4.74e-15	1e-16	11.1917	27.6844	1.84798	ECT2	epithelial cell transforming 2
213811_x_at	4.74e-15	1e-16	11.1913	27.683	0.797179	TCF3	transcription factor 3
209281_s_at	4.77e-15	1.01e-16	-11.1896	27.6764	-1.03683	ATP2B1	ATPase plasma membrane Ca2+ transporting 1
213816_s_at	4.78e-15	1.01e-16	11.1887	27.673	1.65135	MET	MET proto-oncogene, receptor tyrosine kinase
222404_x_at	4.8e-15	1.02e-16	11.1872	27.6675	0.785242	HACD3	3-hydroxyacyl-CoA dehydratase 3
208763_s_at	4.8e-15	1.02e-16	-11.187	27.6665	-1.25811	TSC22D3	TSC22 domain family member 3
213454_at	4.86e-15	1.03e-16	11.1838	27.6546	1.0258	APITD1-CORT///APITD1	APITD1-CORT readthrough///apoptosis-inducing, TAF9-like domain 1
231311_at	4.9e-15	1.04e-16	11.1813	27.645	2.02946
1559477_s_at	5.04e-15	1.07e-16	-11.1736	27.6157	-3.43567	MEIS1	Meis homeobox 1
218997_at	5.06e-15	1.08e-16	11.1725	27.6116	0.957056	POLR1E	RNA polymerase I subunit E
220075_s_at	5.38e-15	1.15e-16	-11.1564	27.5501	-2.6053	CDHR5	cadherin related family member 5
213892_s_at	5.38e-15	1.15e-16	11.1561	27.5491	0.643175	APRT	adenine phosphoribosyltransferase
225687_at	5.45e-15	1.16e-16	11.1522	27.5342	1.40643	FAM83D	family with sequence similarity 83 member D
212077_at	5.5e-15	1.17e-16	-11.1498	27.5251	-1.28866	CALD1	caldesmon 1
222843_at	5.51e-15	1.18e-16	11.1489	27.5215	1.0858	FIGNL1	fidgetin like 1
203787_at	5.51e-15	1.18e-16	-11.1488	27.5213	-1.46913	SSBP2	single stranded DNA binding protein 2
200736_s_at	5.51e-15	1.18e-16	11.1487	27.5208	0.815376	GPX1	glutathione peroxidase 1
202191_s_at	5.52e-15	1.18e-16	-11.1482	27.5189	-2.038	GAS7	growth arrest specific 7
218732_at	5.55e-15	1.19e-16	11.1465	27.5124	0.881949	PTRH2	peptidyl-tRNA hydrolase 2
225736_at	5.62e-15	1.21e-16	11.143	27.4991	0.938661	FBXO22	F-box protein 22
217546_at	5.64e-15	1.21e-16	-11.1417	27.4942	-3.49646	MT1M	metallothionein 1M
228597_at	5.67e-15	1.22e-16	11.1402	27.4886	1.00266	MIS18A	MIS18 kinetochore protein A
200749_at	5.7e-15	1.23e-16	11.1384	27.4819	0.94544	RAN	RAN, member RAS oncogene family
210095_s_at	5.74e-15	1.24e-16	-11.1364	27.4742	-2.04225	IGFBP3	insulin like growth factor binding protein 3
225470_at	5.74e-15	1.24e-16	11.1363	27.4739	0.801505	NUP35	nucleoporin 35
201897_s_at	5.77e-15	1.25e-16	11.1345	27.4669	0.860497	CKS1B	CDC28 protein kinase regulatory subunit 1B
204118_at	5.83e-15	1.26e-16	-11.1316	27.456	-1.91338	CD48	CD48 molecule
209731_at	5.9e-15	1.27e-16	11.1285	27.4441	0.832714	NTHL1	nth like DNA glycosylase 1
207165_at	5.9e-15	1.28e-16	11.1283	27.4432	1.31835	HMMR	hyaluronan mediated motility receptor
229337_at	5.9e-15	1.28e-16	-11.128	27.4422	-2.4758	USP2	ubiquitin specific peptidase 2
202417_at	5.92e-15	1.28e-16	11.1267	27.4373	0.6707	KEAP1	kelch like ECH associated protein 1
224634_at	5.94e-15	1.29e-16	11.1256	27.4329	0.767044	GPATCH4	G-patch domain containing 4
204509_at	5.95e-15	1.29e-16	-11.1251	27.4311	-1.89066	CA12	carbonic anhydrase 12
221712_s_at	5.97e-15	1.3e-16	11.1237	27.4259	0.918451	WDR74	WD repeat domain 74
203130_s_at	5.97e-15	1.3e-16	-11.1236	27.4254	-2.9826	KIF5C	kinesin family member 5C
230655_at	6e-15	1.31e-16	11.1223	27.4205	2.11945
238862_at	6.01e-15	1.31e-16	-11.1216	27.4178	-1.96553	MFSD4A	major facilitator superfamily domain containing 4A
209515_s_at	6.02e-15	1.31e-16	-11.1209	27.4153	-1.20774	RAB27A	RAB27A, member RAS oncogene family
225956_at	6.03e-15	1.32e-16	-11.1202	27.4124	-0.986149	CREBRF	CREB3 regulatory factor
209242_at	6.04e-15	1.32e-16	-11.1195	27.4098	-1.73541	PEG3	paternally expressed 3
225734_at	6.05e-15	1.32e-16	11.1189	27.4076	0.835324	FBXO22	F-box protein 22
210249_s_at	6.07e-15	1.33e-16	-11.118	27.4042	-0.855424	NCOA1	nuclear receptor coactivator 1
216333_x_at	6.12e-15	1.34e-16	-11.1156	27.395	-2.71539	TNXB///TNXA	tenascin XB///tenascin XA (pseudogene)
206483_at	6.12e-15	1.34e-16	11.1154	27.3941	2.00263	LRRC6	leucine rich repeat containing 6
230002_at	6.14e-15	1.35e-16	11.1142	27.3896	1.1667	GPSM2	G-protein signaling modulator 2
203616_at	6.19e-15	1.36e-16	11.1119	27.3807	0.707865	POLB	DNA polymerase beta
218663_at	6.22e-15	1.37e-16	11.1104	27.3752	1.48782	NCAPG	non-SMC condensin I complex subunit G
203554_x_at	6.36e-15	1.4e-16	11.1042	27.3517	1.24126	PTTG1	pituitary tumor-transforming 1
1552931_a_at	6.42e-15	1.41e-16	-11.1018	27.3422	-0.903852	PDE8A	phosphodiesterase 8A
212995_x_at	6.45e-15	1.42e-16	11.1001	27.336	0.714115	MZT2A///MZT2B///PHGDH	mitotic spindle organizing protein 2A///mitotic spindle organizing protein 2B///phosphoglycerate dehydrogenase
209074_s_at	6.54e-15	1.44e-16	-11.0965	27.3223	-2.68693	FAM107A	family with sequence similarity 107 member A
226694_at	6.58e-15	1.45e-16	-11.0946	27.3151	-1.37824	PALM2-AKAP2///AKAP2	PALM2-AKAP2 readthrough///A-kinase anchoring protein 2
206641_at	6.7e-15	1.48e-16	-11.0896	27.2957	-2.43409	TNFRSF17	TNF receptor superfamily member 17
241765_at	6.7e-15	1.48e-16	-11.0894	27.295	-1.993	CPM	carboxypeptidase M
201873_s_at	6.82e-15	1.51e-16	11.0846	27.2767	0.866638	ABCE1	ATP binding cassette subfamily E member 1
201136_at	6.89e-15	1.52e-16	11.0818	27.2662	0.834897	PLP2	proteolipid protein 2
224341_x_at	6.91e-15	1.53e-16	11.0808	27.2621	1.57664	TLR4	toll like receptor 4
209891_at	6.93e-15	1.54e-16	11.0798	27.2586	1.31931	SPC25	SPC25, NDC80 kinetochore complex component
222757_s_at	7.03e-15	1.56e-16	11.0757	27.2428	1.02246	ZAK	sterile alpha motif and leucine zipper containing kinase AZK
208696_at	7.09e-15	1.57e-16	11.0735	27.2346	0.815127	CCT5	chaperonin containing TCP1 subunit 5
200732_s_at	7.25e-15	1.61e-16	-11.0673	27.2107	-0.915358	PTP4A1	protein tyrosine phosphatase type IVA, member 1
204912_at	7.28e-15	1.62e-16	-11.0661	27.2062	-1.28874	IL10RA	interleukin 10 receptor subunit alpha
221122_at	7.6e-15	1.69e-16	-11.0548	27.163	-3.0685	HRASLS2	HRAS like suppressor 2
205645_at	7.66e-15	1.71e-16	11.0525	27.1544	1.05447	REPS2	RALBP1 associated Eps domain containing 2
205547_s_at	7.68e-15	1.71e-16	-11.0511	27.1491	-1.61823	TAGLN	transgelin
218898_at	7.68e-15	1.72e-16	11.051	27.1486	1.29955	FAM57A	family with sequence similarity 57 member A
205112_at	7.68e-15	1.72e-16	-11.051	27.1485	-1.19194	PLCE1	phospholipase C epsilon 1
208671_at	7.74e-15	1.73e-16	-11.0488	27.1401	-0.650177	SERINC1	serine incorporator 1
229733_s_at	7.76e-15	1.74e-16	-11.0478	27.1364	-1.23869
202671_s_at	7.82e-15	1.75e-16	11.0458	27.1286	0.873971	PDXK	pyridoxal (pyridoxine, vitamin B6) kinase
1554523_a_at	7.86e-15	1.76e-16	-11.0443	27.123	-1.52416	CNNM2	cyclin and CBS domain divalent metal cation transport mediator 2
219736_at	7.91e-15	1.77e-16	-11.0421	27.1147	-1.38589	TRIM36	tripartite motif containing 36
225897_at	7.97e-15	1.79e-16	-11.04	27.1068	-0.866958	MARCKS	myristoylated alanine rich protein kinase C substrate
225060_at	7.99e-15	1.79e-16	11.0393	27.1039	0.881172	LRP11	LDL receptor related protein 11
205932_s_at	8.05e-15	1.81e-16	11.037	27.0952	3.0496	MSX1	msh homeobox 1
217946_s_at	8.08e-15	1.82e-16	11.036	27.0912	0.66666	SAE1	SUMO1 activating enzyme subunit 1
206199_at	8.1e-15	1.82e-16	-11.0351	27.0879	-2.701	CEACAM7	carcinoembryonic antigen related cell adhesion molecule 7
219342_at	8.11e-15	1.83e-16	-11.0344	27.0853	-1.12438	CASD1	CAS1 domain containing 1
226010_at	8.12e-15	1.83e-16	-11.0341	27.0841	-1.251	SLC25A23	solute carrier family 25 member 23
226682_at	8.2e-15	1.85e-16	-11.0313	27.0733	-1.76691	RORA	RAR related orphan receptor A
219064_at	8.21e-15	1.85e-16	-11.0307	27.0712	-2.5357	ITIH5	inter-alpha-trypsin inhibitor heavy chain family member 5
218191_s_at	8.22e-15	1.86e-16	-11.0303	27.0694	-0.753714	LMBRD1	LMBR1 domain containing 1
225558_at	8.36e-15	1.89e-16	-11.0255	27.0512	-0.749952	GIT2	GIT ArfGAP 2
228217_s_at	8.38e-15	1.9e-16	11.0247	27.0481	1.14491	PSMG4	proteasome assembly chaperone 4
201292_at	8.38e-15	1.9e-16	11.0244	27.0469	1.27755	TOP2A	topoisomerase (DNA) II alpha
229285_at	8.38e-15	1.9e-16	-11.0241	27.046	-0.861278	RNASEL	ribonuclease L
226642_s_at	8.42e-15	1.91e-16	11.0228	27.041	0.670889	NUDCD2	NudC domain containing 2
218349_s_at	8.44e-15	1.92e-16	11.0221	27.0381	1.07259	ZWILCH	zwilch kinetochore protein
234000_s_at	8.45e-15	1.92e-16	11.0214	27.0356	0.800147	HACD3	3-hydroxyacyl-CoA dehydratase 3
229576_s_at	8.45e-15	1.92e-16	11.0212	27.035	2.34778	TBX3	T-box 3
210571_s_at	8.45e-15	1.92e-16	-11.0212	27.0349	-3.19639	CMAHP	cytidine monophospho-N-acetylneuraminic acid hydroxylase, pseudogene
230282_at	8.46e-15	1.93e-16	-11.0207	27.0329	-1.51274	TSPAN3	tetraspanin 3
212522_at	8.48e-15	1.93e-16	-11.0196	27.0288	-0.833703	PDE8A	phosphodiesterase 8A
209465_x_at	8.54e-15	1.95e-16	-11.0178	27.0217	-2.37216	PTN	pleiotrophin
213226_at	8.58e-15	1.96e-16	11.0163	27.0161	1.28846	CCNA2	cyclin A2
201410_at	8.59e-15	1.96e-16	-11.0156	27.0135	-0.645809	PLEKHB2	pleckstrin homology domain containing B2
202697_at	8.61e-15	1.97e-16	11.0148	27.0104	0.928376	NUDT21	nudix hydrolase 21
214173_x_at	8.66e-15	1.98e-16	11.0132	27.0041	0.526327	URI1	URI1, prefoldin like chaperone
201475_x_at	8.67e-15	1.99e-16	11.0128	27.0026	0.769336	MIR6758///MARS	microRNA 6758///methionyl-tRNA synthetase
222988_s_at	8.71e-15	2e-16	11.0113	26.9969	0.941123	TMEM9	transmembrane protein 9
201160_s_at	8.72e-15	2e-16	11.0108	26.995	0.58266	YBX3	Y-box binding protein 3
232083_at	8.77e-15	2.02e-16	-11.009	26.9882	-0.997488	KIF16B	kinesin family member 16B
233527_at	8.88e-15	2.04e-16	-11.0057	26.9757	-1.6014	LOC101929340	uncharacterized LOC101929340
216602_s_at	8.89e-15	2.05e-16	11.0052	26.9737	0.767844	FARSA	phenylalanyl-tRNA synthetase alpha subunit
228890_at	8.9e-15	2.05e-16	11.0046	26.9713	1.53265	ATOH8	atonal bHLH transcription factor 8
209874_x_at	8.98e-15	2.07e-16	-11.0022	26.9622	-1.18818	CNNM2	cyclin and CBS domain divalent metal cation transport mediator 2
218857_s_at	9.02e-15	2.08e-16	11.0007	26.9565	1.25207	ASRGL1	asparaginase like 1
224339_s_at	9.07e-15	2.09e-16	-10.9992	26.9509	-3.69755	ANGPTL1	angiopoietin like 1
37152_at	9.07e-15	2.1e-16	-10.9989	26.9495	-0.908593	PPARD	peroxisome proliferator activated receptor delta
223804_s_at	9.07e-15	2.1e-16	10.9987	26.9489	0.69805	THUMPD3	THUMP domain containing 3
202686_s_at	9.11e-15	2.11e-16	-10.9974	26.944	-1.28554	AXL	AXL receptor tyrosine kinase
223449_at	9.11e-15	2.11e-16	-10.997	26.9424	-1.92637	SEMA6A	semaphorin 6A
218698_at	9.15e-15	2.12e-16	10.9958	26.9377	1.76335	APIP	APAF1 interacting protein
1553859_at	9.17e-15	2.13e-16	-10.9947	26.9337	-3.33116	TPH1	tryptophan hydroxylase 1
218503_at	9.17e-15	2.13e-16	10.9947	26.9335	0.881621	FOCAD	focadhesin
212671_s_at	9.18e-15	2.13e-16	-10.9944	26.9323	-1.76386	LOC100509457///HLA-DQA2///HLA-DQA1	HLA class II histocompatibility antigen, DQ alpha 1 chain-like///major histocompatibility complex, class II, DQ alpha 2///major histocompatibility complex, class II, DQ alpha 1
203264_s_at	9.2e-15	2.14e-16	-10.9935	26.9292	-1.0294	ARHGEF9	Cdc42 guanine nucleotide exchange factor 9
204774_at	9.28e-15	2.16e-16	-10.9911	26.9198	-1.57722	EVI2A	ecotropic viral integration site 2A
218816_at	9.29e-15	2.16e-16	-10.9907	26.9183	-0.915954	LRRC1	leucine rich repeat containing 1
210809_s_at	9.4e-15	2.19e-16	-10.9873	26.9052	-1.93858	POSTN	periostin
225980_at	9.47e-15	2.21e-16	-10.9852	26.8971	-0.795532	ELMSAN1	ELM2 and Myb/SANT domain containing 1
204092_s_at	9.54e-15	2.23e-16	10.9832	26.8895	1.05846	AURKA	aurora kinase A
204134_at	9.55e-15	2.23e-16	-10.9825	26.8869	-2.44685	PDE2A	phosphodiesterase 2A
230117_at	9.62e-15	2.25e-16	-10.9806	26.8798	-2.46568	VSTM2A	V-set and transmembrane domain containing 2A
203559_s_at	9.88e-15	2.31e-16	-10.9735	26.8525	-1.18714	AOC1	amine oxidase, copper containing 1
238447_at	9.91e-15	2.32e-16	-10.9723	26.8478	-1.61338	RBMS3	RNA binding motif single stranded interacting protein 3
213762_x_at	9.93e-15	2.33e-16	10.9717	26.8455	0.649781	LOC101928747///RBMX///SNORD61	uncharacterized LOC101928747///RNA binding motif protein, X-linked///small nucleolar RNA, C/D box 61
229657_at	9.94e-15	2.33e-16	-10.9713	26.844	-2.06396	THRB	thyroid hormone receptor beta
202688_at	9.98e-15	2.34e-16	-10.97	26.8392	-0.966503	TNFSF10	tumor necrosis factor superfamily member 10
206189_at	1.02e-14	2.39e-16	-10.9652	26.8207	-3.24955	UNC5C	unc-5 netrin receptor C
205133_s_at	1.02e-14	2.39e-16	10.9648	26.8194	0.915622	HSPE1	heat shock protein family E (Hsp10) member 1
201041_s_at	1.05e-14	2.48e-16	-10.9556	26.7839	-2.09936	DUSP1	dual specificity phosphatase 1
235299_at	1.06e-14	2.5e-16	-10.9531	26.7745	-1.10124	SLC41A2	solute carrier family 41 member 2
40189_at	1.09e-14	2.56e-16	10.9468	26.7504	0.564962	SETSIP///SET	SET-like protein///SET nuclear proto-oncogene
204475_at	1.09e-14	2.56e-16	10.9466	26.7496	3.34349	MMP1	matrix metallopeptidase 1
202705_at	1.09e-14	2.57e-16	10.9455	26.7455	1.20981	CCNB2	cyclin B2
204868_at	1.12e-14	2.64e-16	10.939	26.7206	0.781518	MRPL58	mitochondrial ribosomal protein L58
229816_at	1.12e-14	2.65e-16	-10.9373	26.7141	-1.47922	WDR78	WD repeat domain 78
212185_x_at	1.14e-14	2.69e-16	-10.934	26.7012	-1.62556	MT2A	metallothionein 2A
203867_s_at	1.14e-14	2.71e-16	10.9323	26.6949	1.38816	NLE1	notchless homolog 1
208642_s_at	1.14e-14	2.71e-16	10.9318	26.693	0.560906	XRCC5	X-ray repair cross complementing 5
224807_at	1.15e-14	2.72e-16	10.9308	26.6891	1.19461	GRAMD1A	GRAM domain containing 1A
200751_s_at	1.16e-14	2.74e-16	10.9288	26.6813	0.719792	HNRNPC	heterogeneous nuclear ribonucleoprotein C (C1/C2)
203766_s_at	1.16e-14	2.75e-16	-10.928	26.6784	-2.29461	LMOD1	leiomodin 1
201058_s_at	1.17e-14	2.77e-16	-10.9262	26.6713	-1.70971	MYL9	myosin light chain 9
200631_s_at	1.17e-14	2.78e-16	10.925	26.6669	0.570884	SETSIP///SET	SET-like protein///SET nuclear proto-oncogene
213807_x_at	1.17e-14	2.79e-16	10.9248	26.666	1.62254	MET	MET proto-oncogene, receptor tyrosine kinase
217895_at	1.18e-14	2.8e-16	10.9237	26.6617	0.784117	PTCD3	pentatricopeptide repeat domain 3
204059_s_at	1.18e-14	2.8e-16	10.9232	26.6598	1.74232	ME1	malic enzyme 1
1569433_at	1.18e-14	2.81e-16	10.9225	26.6574	1.66266	SAMD5	sterile alpha motif domain containing 5
206282_at	1.2e-14	2.85e-16	-10.9185	26.6418	-4.0232	NEUROD1	neuronal differentiation 1
213953_at	1.22e-14	2.92e-16	-10.9128	26.62	-1.20699	KRT20	keratin 20
203418_at	1.22e-14	2.92e-16	10.9126	26.6193	1.553	CCNA2	cyclin A2
202370_s_at	1.23e-14	2.94e-16	10.9112	26.614	0.812638	CBFB	core-binding factor beta subunit
224857_s_at	1.27e-14	3.03e-16	10.9026	26.5811	0.880625	POLR1D	RNA polymerase I subunit D
208450_at	1.3e-14	3.12e-16	-10.8952	26.5526	-3.46855	LGALS2	galectin 2
218258_at	1.32e-14	3.17e-16	10.8913	26.5376	0.726637	POLR1D	RNA polymerase I subunit D
206499_s_at	1.32e-14	3.17e-16	10.8912	26.5373	1.26588	RCC1	regulator of chromosome condensation 1
204162_at	1.32e-14	3.18e-16	10.8905	26.5344	1.4668	NDC80	NDC80, kinetochore complex component
218711_s_at	1.33e-14	3.19e-16	-10.8898	26.532	-1.33296	SDPR	serum deprivation response
228183_s_at	1.34e-14	3.23e-16	10.8866	26.5198	0.635863	RPAIN	RPA interacting protein
222943_at	1.34e-14	3.24e-16	-10.8858	26.5168	-3.75394	GBA3	glucosylceramidase beta 3 (gene/pseudogene)
214505_s_at	1.35e-14	3.25e-16	-10.8848	26.5129	-1.71948	FHL1	four and a half LIM domains 1
218715_at	1.36e-14	3.27e-16	10.883	26.5058	1.01667	UTP6	UTP6, small subunit processome component
208752_x_at	1.37e-14	3.3e-16	10.8813	26.4991	0.920919	NAP1L1	nucleosome assembly protein 1 like 1
228551_at	1.38e-14	3.33e-16	-10.8784	26.4883	-2.1152	DENND5B	DENN domain containing 5B
226249_at	1.39e-14	3.37e-16	-10.8757	26.4777	-0.956854	SNX30	sorting nexin family member 30
231008_at	1.39e-14	3.37e-16	10.8754	26.4767	1.8045	UNC5CL	unc-5 family C-terminal like
219180_s_at	1.4e-14	3.38e-16	-10.8743	26.4725	-1.15494	PEX26	peroxisomal biogenesis factor 26
238512_at	1.4e-14	3.39e-16	-10.8738	26.4705	-2.29957	WNT2B	Wnt family member 2B
210470_x_at	1.41e-14	3.42e-16	10.8717	26.4626	0.809404	NONO	non-POU domain containing, octamer-binding
207181_s_at	1.45e-14	3.51e-16	-10.8648	26.4362	-0.76177	CASP7	caspase 7
1555465_at	1.45e-14	3.52e-16	-10.8641	26.4334	-2.14379	MCOLN2	mucolipin 2
229097_at	1.46e-14	3.55e-16	10.8622	26.4261	1.27373	DIAPH3	diaphanous related formin 3
213373_s_at	1.46e-14	3.55e-16	10.8617	26.4242	0.705466	CASP8	caspase 8
215438_x_at	1.49e-14	3.62e-16	10.8567	26.4051	0.736248	GSPT1	G1 to S phase transition 1
208910_s_at	1.49e-14	3.62e-16	10.8566	26.4046	0.831046	C1QBP	complement C1q binding protein
221258_s_at	1.5e-14	3.65e-16	10.8544	26.3961	1.05866	KIF18A	kinesin family member 18A
204606_at	1.55e-14	3.78e-16	-10.8457	26.3628	-3.95863	CCL21	C-C motif chemokine ligand 21
226817_at	1.57e-14	3.82e-16	-10.8429	26.3519	-0.77476	DSC2	desmocollin 2
201315_x_at	1.59e-14	3.88e-16	10.8389	26.3365	1.3241	IFITM2	interferon induced transmembrane protein 2
1405_i_at	1.61e-14	3.94e-16	-10.8351	26.322	-2.46857	CCL5	C-C motif chemokine ligand 5
235199_at	1.63e-14	3.99e-16	-10.8316	26.3085	-1.17436	RNF125	ring finger protein 125
209408_at	1.63e-14	3.99e-16	10.8313	26.3076	1.10176	KIF2C	kinesin family member 2C
230308_at	1.63e-14	4e-16	-10.8312	26.3072	-1.35774	FAM120AOS	family with sequence similarity 120A opposite strand
221539_at	1.63e-14	4e-16	10.8308	26.3055	1.00047	EIF4EBP1	eukaryotic translation initiation factor 4E binding protein 1
223403_s_at	1.63e-14	4.01e-16	10.8304	26.3039	0.818312	POLR1B	RNA polymerase I subunit B
203967_at	1.64e-14	4.03e-16	10.8289	26.2981	1.55681	CDC6	cell division cycle 6
214119_s_at	1.65e-14	4.05e-16	-10.8278	26.2938	-1.01278	LOC101929368///FKBP1A	uncharacterized LOC101929368///FK506 binding protein 1A
229221_at	1.65e-14	4.07e-16	10.8267	26.2896	2.40918	CD44	CD44 molecule (Indian blood group)
1555728_a_at	1.69e-14	4.16e-16	-10.8209	26.2675	-1.63898	MS4A4A	membrane spanning 4-domains A4A
41047_at	1.69e-14	4.17e-16	10.8201	26.2645	1.01616	C9orf16	chromosome 9 open reading frame 16
214737_x_at	1.7e-14	4.19e-16	10.8192	26.2608	0.615504	HNRNPC	heterogeneous nuclear ribonucleoprotein C (C1/C2)
217815_at	1.71e-14	4.22e-16	10.8173	26.2537	0.736502	SUPT16H	SPT16 homolog, facilitates chromatin remodeling subunit
1552365_at	1.71e-14	4.22e-16	-10.8171	26.253	-1.7999	SCIN	scinderin
225841_at	1.71e-14	4.23e-16	10.8166	26.251	1.07478	HENMT1	HEN1 methyltransferase homolog 1
204641_at	1.72e-14	4.25e-16	10.8153	26.2458	1.32058	NEK2	NIMA related kinase 2
213132_s_at	1.77e-14	4.37e-16	10.808	26.2181	0.675245	MCAT	malonyl-CoA-acyl carrier protein transacylase
221896_s_at	1.77e-14	4.37e-16	-10.808	26.218	-0.874453	HIGD1A	HIG1 hypoxia inducible domain family member 1A
201669_s_at	1.8e-14	4.47e-16	-10.8023	26.1959	-0.820072	MARCKS	myristoylated alanine rich protein kinase C substrate
217999_s_at	1.82e-14	4.5e-16	10.8004	26.1886	1.72056	PHLDA1	pleckstrin homology like domain family A member 1
218104_at	1.83e-14	4.55e-16	10.7977	26.1785	0.731498	TEX10	testis expressed 10
239294_at	1.87e-14	4.64e-16	-10.7926	26.1588	-1.76918	PIK3CG	phosphatidylinositol-4,5-bisphosphate 3-kinase catalytic subunit gamma
212247_at	1.9e-14	4.71e-16	10.7886	26.1433	0.739843	NUP205	nucleoporin 205
200794_x_at	1.9e-14	4.73e-16	-10.7876	26.1394	-0.488175	DAZAP2	DAZ associated protein 2
206445_s_at	1.91e-14	4.76e-16	10.786	26.1333	0.956318	PRMT1	protein arginine methyltransferase 1
203228_at	1.91e-14	4.76e-16	10.7859	26.1331	0.86015	PAFAH1B3	platelet activating factor acetylhydrolase 1b catalytic subunit 3
219279_at	1.91e-14	4.77e-16	-10.7855	26.1314	-2.46451	DOCK10	dedicator of cytokinesis 10
220310_at	1.92e-14	4.78e-16	-10.7847	26.1282	-1.9592	TUBAL3	tubulin alpha like 3
227346_at	1.92e-14	4.8e-16	-10.7838	26.1248	-1.8616	IKZF1	IKAROS family zinc finger 1
204894_s_at	1.94e-14	4.83e-16	-10.7821	26.1182	-2.2435	AOC3	amine oxidase, copper containing 3
202690_s_at	1.96e-14	4.89e-16	10.779	26.1065	0.872512	SNRPD1	small nuclear ribonucleoprotein D1 polypeptide
1438_at	2e-14	5.01e-16	10.7728	26.0827	1.63285	EPHB3	EPH receptor B3
205135_s_at	2.02e-14	5.07e-16	10.7698	26.0709	0.872555	NUFIP1	NUFIP1, FMR1 interacting protein 1
223194_s_at	2.02e-14	5.07e-16	-10.7697	26.0708	-0.982947	SLC22A23	solute carrier family 22 member 23
202859_x_at	2.03e-14	5.09e-16	10.7689	26.0675	3.57559	CXCL8	C-X-C motif chemokine ligand 8
228396_at	2.03e-14	5.1e-16	-10.7682	26.065	-1.05727	PRKG1	protein kinase, cGMP-dependent, type I
218196_at	2.09e-14	5.25e-16	-10.7605	26.0353	-0.935933	OSTM1	osteopetrosis associated transmembrane protein 1
217926_at	2.15e-14	5.4e-16	10.7535	26.0081	0.612197	C19orf53	chromosome 19 open reading frame 53
231896_s_at	2.15e-14	5.4e-16	10.7533	26.0075	0.42301	DENR	density regulated re-initiation and release factor
206001_at	2.16e-14	5.44e-16	-10.7515	26.0006	-2.46685	NPY	neuropeptide Y
225269_s_at	2.18e-14	5.48e-16	-10.7495	25.993	-1.39094	RBMS1	RNA binding motif single stranded interacting protein 1
205757_at	2.18e-14	5.5e-16	-10.7486	25.9892	-1.62269	ENTPD5	ectonucleoside triphosphate diphosphohydrolase 5
1555778_a_at	2.19e-14	5.51e-16	-10.7482	25.9877	-2.19897	POSTN	periostin
218105_s_at	2.22e-14	5.6e-16	10.7441	25.9722	0.937111	MRPL4	mitochondrial ribosomal protein L4
200052_s_at	2.23e-14	5.64e-16	10.7421	25.9643	0.756857	ILF2	interleukin enhancer binding factor 2
230165_at	2.25e-14	5.67e-16	10.7406	25.9587	1.3155	SGO2	shugoshin 2
232180_at	2.28e-14	5.77e-16	-10.7362	25.9417	-1.5197	UGP2	UDP-glucose pyrophosphorylase 2
205895_s_at	2.29e-14	5.79e-16	10.7353	25.9381	0.817469	NOLC1	nucleolar and coiled-body phosphoprotein 1
209194_at	2.33e-14	5.89e-16	10.7311	25.9218	0.698648	CETN2	centrin 2
220789_s_at	2.33e-14	5.9e-16	10.7306	25.92	0.96849	SNORA5B///TBRG4	small nucleolar RNA, H/ACA box 5B///transforming growth factor beta regulator 4
200704_at	2.34e-14	5.94e-16	-10.7285	25.9122	-0.730446	LITAF	lipopolysaccharide induced TNF factor
223355_at	2.35e-14	5.96e-16	10.7278	25.9093	0.783008	ALG1	ALG1, chitobiosyldiphosphodolichol beta-mannosyltransferase
209645_s_at	2.35e-14	5.97e-16	10.7275	25.908	1.29041	ALDH1B1	aldehyde dehydrogenase 1 family member B1
201721_s_at	2.39e-14	6.07e-16	-10.7233	25.8921	-1.28127	LAPTM5	lysosomal protein transmembrane 5
1555759_a_at	2.4e-14	6.1e-16	-10.7219	25.8867	-2.32471	CCL5	C-C motif chemokine ligand 5
212646_at	2.4e-14	6.11e-16	-10.7214	25.8846	-1.23649	RFTN1	raftlin, lipid raft linker 1
215543_s_at	2.43e-14	6.18e-16	-10.7183	25.8727	-0.749418	LARGE1	LARGE xylosyl- and glucuronyltransferase 1
212195_at	2.44e-14	6.21e-16	-10.7174	25.8692	-0.709822	IL6ST	interleukin 6 signal transducer
227052_at	2.45e-14	6.24e-16	-10.716	25.864	-0.895534	SMIM14	small integral membrane protein 14
217786_at	2.46e-14	6.28e-16	10.7143	25.8573	0.941336	PRMT5	protein arginine methyltransferase 5
202822_at	2.47e-14	6.31e-16	-10.713	25.8524	-0.852073	LPP	LIM domain containing preferred translocation partner in lipoma
224358_s_at	2.47e-14	6.32e-16	-10.7128	25.8515	-1.53927	MS4A7	membrane spanning 4-domains A7
208747_s_at	2.5e-14	6.39e-16	-10.7099	25.8404	-1.51435	C1S	complement component 1, s subcomponent
235210_s_at	2.5e-14	6.4e-16	10.7093	25.838	2.85538	SBSPON	somatomedin B and thrombospondin type 1 domain containing
227682_at	2.51e-14	6.42e-16	-10.7088	25.8361	-0.971621	SPPL2A	signal peptide peptidase like 2A
218901_at	2.52e-14	6.46e-16	-10.7071	25.8295	-1.26083	PLSCR4	phospholipid scramblase 4
217762_s_at	2.52e-14	6.47e-16	-10.7065	25.8271	-1.30179	RAB31	RAB31, member RAS oncogene family
225510_at	2.53e-14	6.48e-16	-10.7061	25.8257	-1.28964	OAF	out at first homolog
225853_at	2.55e-14	6.55e-16	10.7035	25.8157	0.85748	GNPNAT1	glucosamine-phosphate N-acetyltransferase 1
212386_at	2.55e-14	6.56e-16	-10.703	25.8137	-1.57391	TCF4	transcription factor 4
210983_s_at	2.6e-14	6.68e-16	10.6985	25.7964	1.23607	MCM7	minichromosome maintenance complex component 7
1554464_a_at	2.6e-14	6.68e-16	10.6983	25.7957	0.746714	CRTAP	cartilage associated protein
212793_at	2.63e-14	6.78e-16	-10.6945	25.7811	-1.64076	DAAM2	dishevelled associated activator of morphogenesis 2
229288_at	2.66e-14	6.85e-16	-10.6918	25.7706	-2.6028	EPHA7	EPH receptor A7
225398_at	2.66e-14	6.87e-16	10.6912	25.7684	1.03585	RPUSD4	RNA pseudouridylate synthase domain containing 4
204116_at	2.68e-14	6.91e-16	-10.6896	25.7621	-1.25219	IL2RG	interleukin 2 receptor subunit gamma
228469_at	2.68e-14	6.93e-16	-10.689	25.7599	-1.30701	PPID	peptidylprolyl isomerase D
223808_s_at	2.69e-14	6.96e-16	10.6879	25.7554	0.82754	PTPMT1///NDUFS3	protein tyrosine phosphatase, mitochondrial 1///NADH:ubiquinone oxidoreductase core subunit S3
213880_at	2.69e-14	6.96e-16	10.6877	25.7547	2.24106	LGR5	leucine rich repeat containing G protein-coupled receptor 5
219230_at	2.72e-14	7.03e-16	-10.6852	25.745	-2.38553	TMEM100	transmembrane protein 100
230830_at	2.75e-14	7.11e-16	-10.6822	25.7335	-3.46658	SLC51B	solute carrier family 51 beta subunit
232060_at	2.79e-14	7.22e-16	-10.6784	25.7187	-2.26553	ROR1	receptor tyrosine kinase like orphan receptor 1
227280_s_at	2.81e-14	7.3e-16	-10.6756	25.7081	-1.11444	CCNYL1	cyclin Y like 1
236351_at	2.82e-14	7.32e-16	-10.6749	25.7055	-3.68562	DPP10-AS1	DPP10 antisense RNA 1
225743_at	2.84e-14	7.37e-16	10.6729	25.6976	0.753551	RPUSD3	RNA pseudouridylate synthase domain containing 3
200974_at	2.84e-14	7.39e-16	-10.6724	25.6956	-1.25926	ACTA2	actin, alpha 2, smooth muscle, aorta
212527_at	2.86e-14	7.43e-16	10.671	25.6903	0.946719	DESI1	desumoylating isopeptidase 1
212048_s_at	2.88e-14	7.5e-16	10.6685	25.6807	0.961068	YARS	tyrosyl-tRNA synthetase
225655_at	2.88e-14	7.5e-16	10.6685	25.6805	1.26455	UHRF1	ubiquitin like with PHD and ring finger domains 1
222740_at	2.89e-14	7.52e-16	10.6678	25.6779	1.29139	ATAD2	ATPase family, AAA domain containing 2
231580_at	2.91e-14	7.59e-16	-10.6655	25.6691	-2.62753	LINC01082	long intergenic non-protein coding RNA 1082
202810_at	2.95e-14	7.71e-16	10.6615	25.6537	0.473239	DRG1	developmentally regulated GTP binding protein 1
1553984_s_at	3e-14	7.84e-16	10.6572	25.6371	0.878948	DTYMK	deoxythymidylate kinase
212856_at	3.01e-14	7.86e-16	-10.6564	25.6341	-0.84231	GRAMD4	GRAM domain containing 4
213133_s_at	3.03e-14	7.93e-16	10.6543	25.6257	0.842356	LOC101060817///GCSH	glycine cleavage system H protein, mitochondrial-like///glycine cleavage system protein H
212070_at	3.04e-14	7.95e-16	10.6534	25.6225	0.947195	ADGRG1	adhesion G protein-coupled receptor G1
231251_at	3.08e-14	8.06e-16	-10.6501	25.6096	-0.766969	WIPF2	WAS/WASL interacting protein family member 2
1568603_at	3.1e-14	8.11e-16	10.6483	25.6029	2.83689	CADPS	calcium dependent secretion activator
209655_s_at	3.14e-14	8.25e-16	-10.6441	25.5866	-2.11234	TMEM47	transmembrane protein 47
209114_at	3.16e-14	8.29e-16	-10.6426	25.5807	-0.933949	TSPAN1	tetraspanin 1
229152_at	3.17e-14	8.33e-16	-10.6414	25.576	-4.79602	FDCSP	follicular dendritic cell secreted protein
219505_at	3.18e-14	8.35e-16	-10.6408	25.5738	-1.81929	CECR1	cat eye syndrome chromosome region, candidate 1
209545_s_at	3.19e-14	8.39e-16	10.6398	25.5699	1.05481	RIPK2	receptor interacting serine/threonine kinase 2
225671_at	3.21e-14	8.44e-16	10.638	25.5631	1.44816	SPNS2	sphingolipid transporter 2
209031_at	3.21e-14	8.47e-16	-10.6373	25.5603	-1.46992	CADM1	cell adhesion molecule 1
201074_at	3.24e-14	8.54e-16	10.6352	25.5521	0.668335	SMARCC1	SWI/SNF related, matrix associated, actin dependent regulator of chromatin subfamily c member 1
204709_s_at	3.34e-14	8.8e-16	10.6273	25.5216	1.71542	KIF23	kinesin family member 23
226120_at	3.46e-14	9.14e-16	10.6177	25.4845	0.744292	TTC8	tetratricopeptide repeat domain 8
201413_at	3.48e-14	9.19e-16	10.6163	25.4793	0.558512	HSD17B4	hydroxysteroid 17-beta dehydrogenase 4
221933_at	3.51e-14	9.28e-16	-10.6137	25.4692	-3.03219	NLGN4X	neuroligin 4, X-linked
223322_at	3.52e-14	9.31e-16	-10.6128	25.4656	-1.32022	RASSF5	Ras association domain family member 5
205053_at	3.55e-14	9.4e-16	10.6105	25.4566	1.00062	PRIM1	primase (DNA) subunit 1
229242_at	3.59e-14	9.52e-16	10.6071	25.4437	1.78125	TNFSF15	tumor necrosis factor superfamily member 15
220520_s_at	3.6e-14	9.53e-16	10.6067	25.4422	1.10745	NUP62CL	nucleoporin 62 C-terminal like
203150_at	3.63e-14	9.61e-16	10.6046	25.4338	0.838748	RABEPK	Rab9 effector protein with kelch motifs
203432_at	3.66e-14	9.73e-16	10.6016	25.4224	0.802602	TMPO	thymopoietin
224352_s_at	3.67e-14	9.75e-16	-10.6009	25.4196	-1.06148	CFL2	cofilin 2
225535_s_at	3.69e-14	9.8e-16	10.5997	25.415	0.531013	TIMM23B///TIMM23	translocase of inner mitochondrial membrane 23 homolog B///translocase of inner mitochondrial membrane 23
206664_at	3.75e-14	9.97e-16	-10.5953	25.3981	-3.2678	SI	sucrase-isomaltase
226066_at	3.78e-14	1.01e-15	-10.5931	25.3896	-1.24259	MITF	melanogenesis associated transcription factor
212480_at	3.78e-14	1.01e-15	-10.5928	25.3884	-1.06266	SPECC1L	sperm antigen with calponin homology and coiled-coil domains 1 like
201928_at	3.78e-14	1.01e-15	10.5928	25.3881	0.614041	PKP4	plakophilin 4
201251_at	3.8e-14	1.01e-15	10.5912	25.3819	1.17695	PKM	pyruvate kinase, muscle
212268_at	3.81e-14	1.02e-15	10.5905	25.3792	1.02777	SERPINB1	serpin family B member 1
213765_at	3.83e-14	1.02e-15	-10.5887	25.3724	-3.1802	MFAP5	microfibrillar associated protein 5
211984_at	3.91e-14	1.04e-15	-10.5834	25.3518	-0.756436	CALM3///CALM2///CALM1	calmodulin 3///calmodulin 2///calmodulin 1
202133_at	3.93e-14	1.05e-15	-10.582	25.3465	-1.32776	WWTR1	WW domain containing transcription regulator 1
208754_s_at	3.93e-14	1.05e-15	10.5813	25.3439	0.911021	NAP1L1	nucleosome assembly protein 1 like 1
201077_s_at	3.96e-14	1.06e-15	10.5792	25.3355	0.575109	SNU13///ANXA2	SNU13 homolog, small nuclear ribonucleoprotein (U4/U6.U5)///annexin A2
201825_s_at	3.98e-14	1.07e-15	10.5777	25.3299	0.718721	SCCPDH	saccharopine dehydrogenase (putative)
201079_at	3.99e-14	1.07e-15	10.5772	25.3279	0.683066	SYNGR2	synaptogyrin 2
225922_at	4.01e-14	1.08e-15	-10.5757	25.322	-0.886153	FNIP2	folliculin interacting protein 2
219059_s_at	4.01e-14	1.08e-15	-10.5753	25.3206	-2.80589	LYVE1	lymphatic vessel endothelial hyaluronan receptor 1
230615_at	4.06e-14	1.09e-15	10.5722	25.3084	3.37524	DUOXA2	dual oxidase maturation factor 2
210372_s_at	4.08e-14	1.1e-15	10.5708	25.3032	1.47318	TPD52L1	tumor protein D52-like 1
224894_at	4.09e-14	1.1e-15	10.5701	25.3004	0.757965	YAP1	Yes associated protein 1
232654_s_at	4.11e-14	1.11e-15	10.5681	25.2928	2.59261	UGT1A6	UDP glucuronosyltransferase family 1 member A6
225793_at	4.13e-14	1.11e-15	-10.5669	25.2881	-1.19003	LIX1L	limb and CNS expressed 1 like
212681_at	4.16e-14	1.12e-15	-10.5649	25.2804	-2.51929	EPB41L3	erythrocyte membrane protein band 4.1 like 3
201202_at	4.17e-14	1.13e-15	10.564	25.277	0.939733	PCNA	proliferating cell nuclear antigen
201601_x_at	4.18e-14	1.13e-15	10.5637	25.2756	1.36843	IFITM2///IFITM1	interferon induced transmembrane protein 2///interferon induced transmembrane protein 1
228459_at	4.2e-14	1.13e-15	10.5622	25.2701	1.23353	FAM84A	family with sequence similarity 84 member A
209017_s_at	4.22e-14	1.14e-15	10.5604	25.2629	0.782631	LONP1	lon peptidase 1, mitochondrial
209482_at	4.23e-14	1.15e-15	10.5596	25.2597	0.684762	POP7	POP7 homolog, ribonuclease P/MRP subunit
221781_s_at	4.33e-14	1.17e-15	10.5538	25.2373	1.08986	DNAJC10	DnaJ heat shock protein family (Hsp40) member C10
219275_at	4.35e-14	1.18e-15	10.5525	25.2323	0.800905	PDCD5	programmed cell death 5
223620_at	4.39e-14	1.19e-15	-10.5497	25.2216	-1.38825	GPR34	G protein-coupled receptor 34
220059_at	4.39e-14	1.19e-15	-10.5497	25.2214	-2.70365	STAP1	signal transducing adaptor family member 1
220146_at	4.4e-14	1.19e-15	-10.5488	25.2181	-2.17947	TLR7	toll like receptor 7
230895_at	4.4e-14	1.2e-15	-10.5486	25.2172	-3.03116	HAPLN1	hyaluronan and proteoglycan link protein 1
226963_at	4.4e-14	1.2e-15	10.5484	25.2165	0.739846	BTF3L4	basic transcription factor 3 like 4
202212_at	4.41e-14	1.2e-15	10.5475	25.213	0.651114	PES1	pescadillo ribosomal biogenesis factor 1
222631_at	4.47e-14	1.22e-15	10.5438	25.1988	0.726455	SEPSECS-AS1///PI4K2B	SEPSECS antisense RNA 1 (head to head)///phosphatidylinositol 4-kinase type 2 beta
222146_s_at	4.51e-14	1.23e-15	-10.5415	25.19	-1.31125	TCF4	transcription factor 4
213353_at	4.56e-14	1.24e-15	-10.5387	25.179	-1.19166	ABCA5	ATP binding cassette subfamily A member 5
1555963_x_at	4.57e-14	1.25e-15	-10.538	25.1764	-2.05377	B3GNT7	UDP-GlcNAc:betaGal beta-1,3-N-acetylglucosaminyltransferase 7
215672_s_at	4.61e-14	1.26e-15	-10.5354	25.1663	-1.49414	AHCYL2	adenosylhomocysteinase like 2
210619_s_at	4.61e-14	1.26e-15	10.5351	25.165	3.02438	HYAL1	hyaluronoglucosaminidase 1
202522_at	4.88e-14	1.33e-15	10.5204	25.1081	0.563089	PITPNB	phosphatidylinositol transfer protein beta
226878_at	4.88e-14	1.34e-15	-10.5201	25.107	-1.35746	HLA-DOA	major histocompatibility complex, class II, DO alpha
220133_at	4.92e-14	1.35e-15	10.518	25.0987	3.10457	ODAM	odontogenic, ameloblast asssociated
228014_at	4.95e-14	1.36e-15	10.5163	25.0921	1.13164	PTRH1	peptidyl-tRNA hydrolase 1 homolog
241370_at	4.99e-14	1.37e-15	-10.5143	25.0844	-1.28529	LOC286052	uncharacterized LOC286052
203797_at	5.01e-14	1.37e-15	10.5129	25.0789	1.19866	VSNL1	visinin like 1
235209_at	5.05e-14	1.39e-15	10.5104	25.0694	3.20904	SBSPON	somatomedin B and thrombospondin type 1 domain containing
235306_at	5.06e-14	1.39e-15	-10.5098	25.0668	-1.46392	GIMAP8	GTPase, IMAP family member 8
227220_at	5.08e-14	1.39e-15	10.5089	25.0637	0.883471	NFXL1	nuclear transcription factor, X-box binding like 1
213092_x_at	5.1e-14	1.4e-15	10.5074	25.0576	0.822598	DNAJC9	DnaJ heat shock protein family (Hsp40) member C9
228480_at	5.13e-14	1.41e-15	-10.506	25.0522	-1.15473	VAPA	VAMP associated protein A
224060_s_at	5.13e-14	1.41e-15	10.5058	25.0514	0.815447	DPH5	diphthamide biosynthesis 5
210319_x_at	5.28e-14	1.45e-15	10.4982	25.0219	4.0096	MSX2	msh homeobox 2
1566115_at	5.35e-14	1.48e-15	-10.4943	25.0071	-2.63988
202888_s_at	5.35e-14	1.48e-15	-10.4942	25.0067	-3.92778	ANPEP	alanyl aminopeptidase, membrane
215127_s_at	5.38e-14	1.49e-15	-10.4927	25.0006	-1.36244	RBMS1	RNA binding motif single stranded interacting protein 1
222250_s_at	5.47e-14	1.51e-15	10.4885	24.9845	0.935634	INTS7	integrator complex subunit 7
235871_at	5.5e-14	1.52e-15	-10.4868	24.978	-0.890152	LIPH	lipase H
1554627_a_at	5.53e-14	1.53e-15	10.4854	24.9723	0.744034	ASCC1	activating signal cointegrator 1 complex subunit 1
211015_s_at	5.53e-14	1.53e-15	10.4851	24.9711	0.690596	HSPA4	heat shock protein family A (Hsp70) member 4
225036_at	5.54e-14	1.53e-15	10.4847	24.9696	0.746932	TOMM5	translocase of outer mitochondrial membrane 5
227702_at	5.69e-14	1.58e-15	10.4774	24.9416	3.11586	CYP4X1	cytochrome P450 family 4 subfamily X member 1
208540_x_at	5.76e-14	1.6e-15	10.4743	24.9294	1.53211
204887_s_at	5.77e-14	1.6e-15	10.4736	24.9265	1.23868	PLK4	polo like kinase 4
214095_at	5.85e-14	1.62e-15	10.4698	24.9119	1.36861	SHMT2	serine hydroxymethyltransferase 2
227134_at	5.88e-14	1.63e-15	10.4686	24.9071	1.50646	SYTL1	synaptotagmin like 1
225344_at	5.88e-14	1.63e-15	10.4683	24.9061	1.1359	NCOA7	nuclear receptor coactivator 7
1552367_a_at	5.92e-14	1.65e-15	-10.4665	24.8991	-1.84357	SCIN	scinderin
210390_s_at	6e-14	1.67e-15	-10.4627	24.8842	-1.17284	CCL15-CCL14///CCL15	CCL15-CCL14 readthrough (NMD candidate)///C-C motif chemokine ligand 15
203987_at	6.01e-14	1.68e-15	10.462	24.8815	0.820368	FZD6	frizzled class receptor 6
224959_at	6.01e-14	1.68e-15	-10.4619	24.8812	-3.08788	SLC26A2	solute carrier family 26 member 2
204042_at	6.08e-14	1.7e-15	-10.4589	24.8696	-2.37183	WASF3	WAS protein family member 3
218559_s_at	6.08e-14	1.7e-15	-10.4585	24.868	-1.48366	MAFB	MAF bZIP transcription factor B
36475_at	6.16e-14	1.72e-15	10.4552	24.8552	0.845115	GCAT	glycine C-acetyltransferase
210549_s_at	6.17e-14	1.72e-15	-10.4546	24.8528	-3.39454	CCL23	C-C motif chemokine ligand 23
219217_at	6.17e-14	1.73e-15	10.4541	24.8512	0.651091	NARS2	asparaginyl-tRNA synthetase 2, mitochondrial (putative)
203686_at	6.3e-14	1.76e-15	10.449	24.8312	0.955304	MPG	N-methylpurine DNA glycosylase
200921_s_at	6.31e-14	1.77e-15	-10.448	24.8274	-0.788923	BTG1	BTG anti-proliferation factor 1
221570_s_at	6.31e-14	1.77e-15	10.448	24.8274	0.829399	METTL5	methyltransferase like 5
36830_at	6.31e-14	1.77e-15	10.4479	24.8267	0.774407	MIPEP	mitochondrial intermediate peptidase
212137_at	6.32e-14	1.77e-15	10.4473	24.8246	0.623585	LARP1	La ribonucleoprotein domain family member 1
1555962_at	6.36e-14	1.79e-15	-10.4454	24.8174	-1.91728	B3GNT7	UDP-GlcNAc:betaGal beta-1,3-N-acetylglucosaminyltransferase 7
224826_at	6.41e-14	1.8e-15	10.4434	24.8093	1.26081	GPCPD1	glycerophosphocholine phosphodiesterase 1
229632_s_at	6.44e-14	1.81e-15	10.442	24.8041	0.667603	INTS10	integrator complex subunit 10
212286_at	6.45e-14	1.81e-15	-10.4415	24.8022	-0.724835	ANKRD12	ankyrin repeat domain 12
200790_at	6.46e-14	1.82e-15	10.4408	24.7994	1.1327	ODC1	ornithine decarboxylase 1
202641_at	6.49e-14	1.83e-15	10.4395	24.7944	0.72723	ARL3	ADP ribosylation factor like GTPase 3
204905_s_at	6.53e-14	1.84e-15	10.4379	24.7879	1.03226	EEF1E1	eukaryotic translation elongation factor 1 epsilon 1
230087_at	6.6e-14	1.86e-15	-10.4349	24.7766	-2.33487	PRIMA1	proline rich membrane anchor 1
205289_at	6.6e-14	1.86e-15	-10.4349	24.7765	-1.17441	BMP2	bone morphogenetic protein 2
217845_x_at	6.7e-14	1.89e-15	-10.4306	24.7596	-0.714361	HIGD1A	HIG1 hypoxia inducible domain family member 1A
213891_s_at	6.75e-14	1.91e-15	-10.4285	24.7517	-1.40753	TCF4	transcription factor 4
231823_s_at	6.79e-14	1.92e-15	10.4269	24.7453	0.936648	SH3PXD2B	SH3 and PX domains 2B
227140_at	6.79e-14	1.92e-15	10.4267	24.7445	2.9854	INHBA	inhibin beta A subunit
224989_at	6.82e-14	1.93e-15	-10.4255	24.7399	-0.974486	SMIM14	small integral membrane protein 14
225939_at	6.84e-14	1.94e-15	-10.4247	24.7367	-1.07704	EIF4E3	eukaryotic translation initiation factor 4E family member 3
1555250_a_at	6.87e-14	1.95e-15	-10.4234	24.7317	-1.24365	CPEB3	cytoplasmic polyadenylation element binding protein 3
220060_s_at	7e-14	1.99e-15	10.4183	24.7119	1.22839	PARPBP	PARP1 binding protein
1557910_at	7.01e-14	1.99e-15	10.4177	24.7098	0.823903	HSP90AB1	heat shock protein 90 alpha family class B member 1
213499_at	7.03e-14	2e-15	-10.417	24.707	-1.2662	CLCN2	chloride voltage-gated channel 2
209696_at	7.03e-14	2e-15	10.4168	24.7063	0.722742	FBP1	fructose-bisphosphatase 1
1554094_at	7.04e-14	2e-15	-10.4164	24.7044	-1.30178	ENTPD5	ectonucleoside triphosphate diphosphohydrolase 5
201761_at	7.05e-14	2.01e-15	10.4155	24.7012	1.12336	MTHFD2	methylenetetrahydrofolate dehydrogenase (NADP+ dependent) 2, methenyltetrahydrofolate cyclohydrolase
224356_x_at	7.08e-14	2.02e-15	-10.4144	24.6968	-1.47892	MS4A6A	membrane spanning 4-domains A6A
213039_at	7.09e-14	2.02e-15	-10.414	24.6954	-0.905208	ARHGEF18	Rho/Rac guanine nucleotide exchange factor 18
211713_x_at	7.15e-14	2.04e-15	10.4116	24.686	1.09392	KIAA0101	KIAA0101
214696_at	7.17e-14	2.05e-15	-10.4108	24.6828	-1.5673	MIR22///MIR22HG	microRNA 22///MIR22 host gene
200037_s_at	7.39e-14	2.11e-15	10.4029	24.6521	0.713534	CBX3	chromobox 3
227758_at	7.4e-14	2.11e-15	-10.4023	24.6499	-2.40639	RERG	RAS like estrogen regulated growth inhibitor
218145_at	7.45e-14	2.13e-15	10.4006	24.6432	1.55838	TRIB3	tribbles pseudokinase 3
212143_s_at	7.52e-14	2.15e-15	-10.3977	24.6321	-1.40114	IGFBP3	insulin like growth factor binding protein 3
49111_at	7.56e-14	2.16e-15	-10.3964	24.6267	-0.991793	ARRB1	arrestin beta 1
224879_at	7.65e-14	2.19e-15	10.3931	24.614	0.621527	TMEM261	transmembrane protein 261
204700_x_at	7.71e-14	2.21e-15	10.391	24.606	0.720211	DIEXF	digestive organ expansion factor homolog (zebrafish)
205190_at	7.74e-14	2.22e-15	-10.3899	24.6016	-0.70548	PLS1	plastin 1
230109_at	7.83e-14	2.25e-15	-10.3869	24.5898	-1.97726	PDE7B	phosphodiesterase 7B
244741_s_at	7.91e-14	2.27e-15	-10.3838	24.5779	-2.33568	ZNF667-AS1	ZNF667 antisense RNA 1 (head to head)
204235_s_at	7.91e-14	2.27e-15	-10.3836	24.5773	-2.09691	GULP1	GULP, engulfment adaptor PTB domain containing 1
230110_at	8e-14	2.3e-15	-10.3807	24.5657	-2.03916	MCOLN2	mucolipin 2
215165_x_at	8.29e-14	2.39e-15	10.3714	24.5299	0.69346	UMPS	uridine monophosphate synthetase
227239_at	8.33e-14	2.4e-15	-10.37	24.5243	-1.39501	FAM126A	family with sequence similarity 126 member A
213047_x_at	8.34e-14	2.4e-15	10.3697	24.523	0.542979	SETSIP///SET	SET-like protein///SET nuclear proto-oncogene
227425_at	8.47e-14	2.44e-15	10.3654	24.5065	0.832967	REPS2	RALBP1 associated Eps domain containing 2
223502_s_at	8.53e-14	2.46e-15	-10.3636	24.4995	-1.50746	TNFSF13B	tumor necrosis factor superfamily member 13b
220577_at	8.62e-14	2.49e-15	-10.3604	24.4868	-1.31455	GVINP1	GTPase, very large interferon inducible pseudogene 1
201114_x_at	8.62e-14	2.49e-15	10.3604	24.4868	0.642939	PSMA7	proteasome subunit alpha 7
224709_s_at	8.63e-14	2.49e-15	-10.3601	24.4856	-0.575956	CDC42SE2	CDC42 small effector 2
221582_at	8.73e-14	2.52e-15	10.357	24.4738	1.20803	HIST3H2A	histone cluster 3, H2a
203416_at	8.81e-14	2.55e-15	-10.3543	24.4632	-1.21727	CD53	CD53 molecule
204026_s_at	8.85e-14	2.56e-15	10.3531	24.4585	1.09582	ZWINT	ZW10 interacting kinetochore protein
204562_at	8.91e-14	2.58e-15	-10.3512	24.4512	-1.50963	IRF4	interferon regulatory factor 4
211623_s_at	8.94e-14	2.59e-15	10.3501	24.447	0.686565	FBL	fibrillarin
226815_at	8.94e-14	2.59e-15	10.35	24.4466	0.899483	TAMM41	TAM41 mitochondrial translocator assembly and maintenance homolog
202949_s_at	8.99e-14	2.61e-15	10.3484	24.4401	1.16071	FHL2	four and a half LIM domains 2
210137_s_at	9.03e-14	2.62e-15	10.3471	24.4352	0.731832	DCTD	dCMP deaminase
205472_s_at	9.16e-14	2.66e-15	10.3434	24.4207	1.3882	DACH1	dachshund family transcription factor 1
218163_at	9.18e-14	2.67e-15	10.3426	24.4176	0.601569	MCTS1	MCTS1, re-initiation and release factor
201463_s_at	9.18e-14	2.67e-15	10.3424	24.4167	0.684549	TALDO1	transaldolase 1
216996_s_at	9.2e-14	2.68e-15	10.3418	24.4144	0.693568	FASTKD2	FAST kinase domains 2
210021_s_at	9.21e-14	2.68e-15	10.3412	24.4122	2.35688	CCNO	cyclin O
218162_at	9.26e-14	2.7e-15	-10.3399	24.4071	-1.50133	OLFML3	olfactomedin like 3
207396_s_at	9.32e-14	2.72e-15	10.3379	24.3995	0.816657	ALG3	ALG3, alpha-1,3- mannosyltransferase
203966_s_at	9.32e-14	2.72e-15	-10.3377	24.3987	-0.715596	PPM1A	protein phosphatase, Mg2+/Mn2+ dependent 1A
225912_at	9.51e-14	2.78e-15	-10.3324	24.3779	-0.930405	TP53INP1	tumor protein p53 inducible nuclear protein 1
229460_at	9.52e-14	2.78e-15	-10.3322	24.3771	-0.769722	FAM126B	family with sequence similarity 126 member B
218805_at	9.59e-14	2.8e-15	-10.33	24.3687	-1.31023	GIMAP1-GIMAP5///GIMAP5	GIMAP1-GIMAP5 readthrough///GTPase, IMAP family member 5
202023_at	9.68e-14	2.83e-15	-10.3276	24.3591	-1.22717	EFNA1	ephrin A1
212626_x_at	9.75e-14	2.86e-15	10.3254	24.3507	0.735037	HNRNPC	heterogeneous nuclear ribonucleoprotein C (C1/C2)
200870_at	9.76e-14	2.86e-15	10.325	24.349	0.598488	STRAP	serine/threonine kinase receptor associated protein
227231_at	9.83e-14	2.88e-15	-10.3229	24.3409	-1.46983	KIAA1211	KIAA1211
201334_s_at	9.83e-14	2.88e-15	-10.3229	24.3408	-0.695964	ARHGEF12	Rho guanine nucleotide exchange factor 12
213030_s_at	1e-13	2.94e-15	-10.3181	24.3224	-0.840291	PLXNA2	plexin A2
233878_s_at	1e-13	2.94e-15	10.3176	24.3203	0.69755	XRN2	5'-3' exoribonuclease 2
233950_at	1.01e-13	2.96e-15	10.3166	24.3165	2.46694	CADPS	calcium dependent secretion activator
215806_x_at	1.03e-13	3.03e-15	-10.3107	24.2932	-2.05597	TARP///TRGV9///TRGC2	TCR gamma alternate reading frame protein///T cell receptor gamma variable 9///T cell receptor gamma constant 2
218188_s_at	1.03e-13	3.03e-15	10.3103	24.2917	0.654865	TIMM13	translocase of inner mitochondrial membrane 13
207850_at	1.06e-13	3.11e-15	10.3034	24.2649	2.79052	CXCL3	C-X-C motif chemokine ligand 3
200840_at	1.07e-13	3.15e-15	10.3005	24.2538	0.65164	KARS	lysyl-tRNA synthetase
202073_at	1.07e-13	3.16e-15	-10.2993	24.2488	-1.01663	OPTN	optineurin
208887_at	1.07e-13	3.17e-15	10.299	24.2477	0.646638	EIF3G	eukaryotic translation initiation factor 3 subunit G
210547_x_at	1.08e-13	3.18e-15	10.2981	24.2444	0.943626	ICA1	islet cell autoantigen 1
207621_s_at	1.09e-13	3.21e-15	10.2954	24.2339	0.995954	PEMT	phosphatidylethanolamine N-methyltransferase
213217_at	1.1e-13	3.24e-15	-10.2931	24.225	-2.4472	ADCY2	adenylate cyclase 2
202715_at	1.1e-13	3.24e-15	10.2931	24.2249	1.01877	CAD	carbamoyl-phosphate synthetase 2, aspartate transcarbamylase, and dihydroorotase
1554530_at	1.1e-13	3.25e-15	-10.2921	24.2208	-3.97013	VSTM2A	V-set and transmembrane domain containing 2A
226844_at	1.1e-13	3.27e-15	-10.291	24.2167	-1.10675	MOB3B	MOB kinase activator 3B
208795_s_at	1.1e-13	3.27e-15	10.2907	24.2156	0.944792	MCM7	minichromosome maintenance complex component 7
203082_at	1.11e-13	3.3e-15	10.2886	24.2075	0.757343	BMS1	BMS1, ribosome biogenesis factor
201010_s_at	1.11e-13	3.31e-15	-10.2881	24.2052	-0.842987	TXNIP	thioredoxin interacting protein
214484_s_at	1.12e-13	3.33e-15	10.2861	24.1974	0.941569	SIGMAR1	sigma non-opioid intracellular receptor 1
205933_at	1.14e-13	3.38e-15	-10.2827	24.1843	-2.26294	SETBP1	SET binding protein 1
216920_s_at	1.15e-13	3.4e-15	-10.2805	24.1758	-2.04407	TARP///TRGV9///TRGC2	TCR gamma alternate reading frame protein///T cell receptor gamma variable 9///T cell receptor gamma constant 2
209200_at	1.16e-13	3.44e-15	-10.2782	24.1667	-1.82768	MEF2C	myocyte enhancer factor 2C
1555618_s_at	1.18e-13	3.5e-15	10.2734	24.1479	0.615616	SAE1	SUMO1 activating enzyme subunit 1
224896_s_at	1.18e-13	3.51e-15	10.273	24.1464	0.842191	TTL	tubulin tyrosine ligase
217809_at	1.19e-13	3.53e-15	10.2711	24.1389	0.598178	BZW2	basic leucine zipper and W2 domains 2
204745_x_at	1.19e-13	3.55e-15	-10.2697	24.1337	-2.10262	MT1G	metallothionein 1G
206059_at	1.19e-13	3.56e-15	-10.2689	24.1304	-1.34086	ZNF91	zinc finger protein 91
233970_s_at	1.19e-13	3.57e-15	10.2687	24.1297	0.782502	TRMT6	tRNA methyltransferase 6
203986_at	1.2e-13	3.58e-15	-10.268	24.1269	-1.33085	FAM47E-STBD1///FAM47E///STBD1	FAM47E-STBD1 readthrough///family with sequence similarity 47 member E///starch binding domain 1
203696_s_at	1.2e-13	3.6e-15	10.2664	24.121	0.971367	RFC2	replication factor C subunit 2
205997_at	1.21e-13	3.62e-15	-10.2652	24.1162	-1.74517	ADAM28	ADAM metallopeptidase domain 28
228728_at	1.22e-13	3.65e-15	-10.263	24.1077	-1.48214	CPED1	cadherin like and PC-esterase domain containing 1
206263_at	1.24e-13	3.72e-15	-10.2577	24.087	-1.0372	FMO4	flavin containing monooxygenase 4
213456_at	1.26e-13	3.78e-15	-10.2535	24.0706	-1.72148	SOSTDC1	sclerostin domain containing 1
209100_at	1.28e-13	3.84e-15	10.2501	24.0572	0.946746	IFRD2	interferon related developmental regulator 2
219368_at	1.28e-13	3.84e-15	-10.2499	24.0563	-2.48713	NAP1L2	nucleosome assembly protein 1 like 2
202969_at	1.28e-13	3.84e-15	-10.2496	24.0554	-0.710089	DYRK2	dual specificity tyrosine phosphorylation regulated kinase 2
215227_x_at	1.3e-13	3.89e-15	10.2464	24.0429	0.741757	ACP1	acid phosphatase 1, soluble
237802_at	1.3e-13	3.89e-15	-10.2463	24.0424	-3.23579	XKR4	XK related 4
209395_at	1.3e-13	3.89e-15	10.2463	24.0422	3.32999	CHI3L1	chitinase 3 like 1
230550_at	1.3e-13	3.9e-15	-10.246	24.0413	-1.44407	MS4A6A	membrane spanning 4-domains A6A
223234_at	1.3e-13	3.91e-15	10.2455	24.0392	1.04645	MAD2L2	MAD2 mitotic arrest deficient-like 2 (yeast)
208833_s_at	1.3e-13	3.93e-15	10.2441	24.0339	0.622104	ATXN10	ataxin 10
1554384_at	1.31e-13	3.95e-15	-10.2425	24.0274	-2.13152	PADI2	peptidyl arginine deiminase 2
223730_at	1.31e-13	3.95e-15	-10.2424	24.0273	-2.63196	GPC6	glypican 6
225224_at	1.32e-13	3.98e-15	-10.2408	24.0211	-0.753515	NOL4L	nucleolar protein 4 like
241359_at	1.32e-13	4e-15	-10.2395	24.016	-1.22671	TLCD2	TLC domain containing 2
224811_at	1.32e-13	4e-15	-10.2395	24.0158	-0.842257	LPP	LIM domain containing preferred translocation partner in lipoma
222258_s_at	1.33e-13	4.01e-15	10.2389	24.0137	0.763395	SH3BP4	SH3 domain binding protein 4
219060_at	1.34e-13	4.06e-15	10.2354	23.9998	0.796318	WDYHV1	WDYHV motif containing 1
231925_at	1.35e-13	4.07e-15	-10.2348	23.9976	-1.54459	P2RY1	purinergic receptor P2Y1
205097_at	1.36e-13	4.12e-15	-10.2317	23.9853	-3.12652	SLC26A2	solute carrier family 26 member 2
226814_at	1.36e-13	4.13e-15	10.231	23.9825	1.51489	ADAMTS9	ADAM metallopeptidase with thrombospondin type 1 motif 9
226858_at	1.45e-13	4.39e-15	10.216	23.924	0.98866	CSNK1E	casein kinase 1 epsilon
213680_at	1.45e-13	4.39e-15	10.2155	23.9221	3.27301	KRT6B	keratin 6B
218398_at	1.46e-13	4.44e-15	10.2128	23.9117	0.636895	MRPS30	mitochondrial ribosomal protein S30
1555372_at	1.46e-13	4.45e-15	-10.2123	23.9098	-1.1849	BCL2L11	BCL2 like 11
203564_at	1.47e-13	4.46e-15	10.2117	23.9072	0.896592	FANCG	Fanconi anemia complementation group G
206364_at	1.48e-13	4.49e-15	10.2099	23.9002	1.33659	KIF14	kinesin family member 14
208244_at	1.5e-13	4.56e-15	-10.2063	23.8861	-2.91874	BMP3	bone morphogenetic protein 3
204119_s_at	1.5e-13	4.58e-15	10.2051	23.8814	0.900418	ADK	adenosine kinase
212263_at	1.53e-13	4.67e-15	-10.1997	23.8604	-1.15893	QKI	QKI, KH domain containing RNA binding
209063_x_at	1.55e-13	4.73e-15	10.1968	23.8492	0.586923	PAIP1	poly(A) binding protein interacting protein 1
201668_x_at	1.55e-13	4.73e-15	-10.1967	23.8487	-1.02529	MARCKS	myristoylated alanine rich protein kinase C substrate
201995_at	1.58e-13	4.82e-15	-10.1921	23.8309	-0.636216	EXT1	exostosin glycosyltransferase 1
227048_at	1.58e-13	4.82e-15	-10.192	23.8304	-2.44397	LAMA1	laminin subunit alpha 1
226349_at	1.6e-13	4.89e-15	10.1882	23.8155	1.12636	C12orf45	chromosome 12 open reading frame 45
204058_at	1.61e-13	4.91e-15	10.1872	23.8115	1.85266	ME1	malic enzyme 1
235037_at	1.62e-13	4.95e-15	10.1851	23.8035	0.669582	TMEM41A	transmembrane protein 41A
233587_s_at	1.63e-13	5e-15	-10.1826	23.7936	-1.01853	SIPA1L2	signal induced proliferation associated 1 like 2
235845_at	1.64e-13	5.01e-15	10.1818	23.7907	2.64315	SP5	Sp5 transcription factor
209047_at	1.64e-13	5.03e-15	-10.1811	23.7879	-2.24214	AQP1	aquaporin 1 (Colton blood group)
221903_s_at	1.65e-13	5.07e-15	-10.1792	23.7802	-0.916359	CYLD	CYLD lysine 63 deubiquitinase
219366_at	1.69e-13	5.18e-15	10.1735	23.7579	0.740132	AVEN	apoptosis and caspase activation inhibitor
1553959_a_at	1.69e-13	5.2e-15	10.1725	23.7544	0.864457	B3GALT6	beta-1,3-galactosyltransferase 6
226980_at	1.74e-13	5.35e-15	10.1654	23.7262	1.32383	DEPDC1B	DEP domain containing 1B
225481_at	1.75e-13	5.38e-15	-10.1639	23.7205	-1.59872	FRMD6	FERM domain containing 6
226446_at	1.77e-13	5.44e-15	10.1611	23.7097	2.16143	HES6	hes family bHLH transcription factor 6
201177_s_at	1.77e-13	5.44e-15	10.161	23.7092	0.726974	UBA2	ubiquitin like modifier activating enzyme 2
227226_at	1.78e-13	5.48e-15	10.1594	23.7031	1.32515	MRAP2	melanocortin 2 receptor accessory protein 2
201532_at	1.8e-13	5.54e-15	10.1563	23.691	0.714133	PSMA3	proteasome subunit alpha 3
214022_s_at	1.81e-13	5.59e-15	10.1541	23.6821	1.40392	IFITM1	interferon induced transmembrane protein 1
206623_at	1.82e-13	5.6e-15	-10.1537	23.6807	-2.64355	PDE6A	phosphodiesterase 6A
226296_s_at	1.82e-13	5.61e-15	10.1532	23.6785	0.669224	MRPS15	mitochondrial ribosomal protein S15
213671_s_at	1.85e-13	5.7e-15	10.1491	23.6628	0.738292	MIR6758///MARS	microRNA 6758///methionyl-tRNA synthetase
221808_at	1.88e-13	5.82e-15	-10.144	23.6429	-0.667837	RAB9A	RAB9A, member RAS oncogene family
230492_s_at	1.88e-13	5.82e-15	10.1439	23.6425	1.10709	GPCPD1	glycerophosphocholine phosphodiesterase 1
1554246_at	1.89e-13	5.86e-15	-10.1421	23.6353	-0.927532	C1orf210	chromosome 1 open reading frame 210
235766_x_at	1.91e-13	5.9e-15	-10.1403	23.6283	-1.16368	RAB27A	RAB27A, member RAS oncogene family
203543_s_at	1.92e-13	5.96e-15	-10.1379	23.6187	-1.17725	KLF9	Kruppel like factor 9
38964_r_at	1.95e-13	6.04e-15	-10.1347	23.6063	-1.25736	WAS	Wiskott-Aldrich syndrome
203123_s_at	1.95e-13	6.05e-15	10.1343	23.6046	1.23929	SLC11A2	solute carrier family 11 member 2
218270_at	1.96e-13	6.09e-15	10.1326	23.5982	0.559863	MRPL24	mitochondrial ribosomal protein L24
229830_at	1.99e-13	6.17e-15	-10.1291	23.5844	-1.49278
225327_at	1.99e-13	6.17e-15	-10.1289	23.5838	-0.794311	FAM214A	family with sequence similarity 214 member A
224996_at	1.99e-13	6.18e-15	10.1288	23.5832	0.695476	ASPH	aspartate beta-hydroxylase
218594_at	2e-13	6.22e-15	10.1272	23.5771	0.633664	HEATR1	HEAT repeat containing 1
216218_s_at	2e-13	6.23e-15	-10.1266	23.5748	-1.44824	PLCL2	phospholipase C like 2
223055_s_at	2.01e-13	6.27e-15	10.125	23.5683	1.03427	XPO5	exportin 5
229139_at	2.02e-13	6.3e-15	10.1237	23.5633	1.10382	JPH1	junctophilin 1
211165_x_at	2.04e-13	6.35e-15	10.1218	23.5559	1.36068	EPHB2	EPH receptor B2
1554007_at	2.04e-13	6.38e-15	-10.1207	23.5517	-2.96085
213340_s_at	2.05e-13	6.39e-15	-10.1203	23.5502	-1.19003	TP73-AS1	TP73 antisense RNA 1
228306_at	2.06e-13	6.44e-15	-10.1181	23.5413	-0.74623	CNIH4	cornichon family AMPA receptor auxiliary protein 4
226292_at	2.07e-13	6.46e-15	-10.1175	23.5389	-1.04283	CAPN5	calpain 5
1555910_at	2.07e-13	6.49e-15	10.1163	23.5345	0.789413	PTCD2	pentatricopeptide repeat domain 2
241342_at	2.08e-13	6.52e-15	-10.1151	23.5296	-0.864962	TMEM65	transmembrane protein 65
209685_s_at	2.09e-13	6.53e-15	-10.1146	23.5276	-1.49758	PRKCB	protein kinase C beta
217418_x_at	2.11e-13	6.6e-15	-10.112	23.5177	-3.65583	MS4A1	membrane spanning 4-domains A1
226002_at	2.11e-13	6.63e-15	-10.1109	23.5133	-0.953315	GAB1	GRB2 associated binding protein 1
218487_at	2.12e-13	6.64e-15	-10.1102	23.5106	-0.743655	ALAD	aminolevulinate dehydratase
222497_x_at	2.13e-13	6.69e-15	10.1083	23.5032	0.753438	NMD3	NMD3 ribosome export adaptor
201133_s_at	2.14e-13	6.72e-15	-10.1075	23.4998	-0.891303	PJA2	praja ring finger ubiquitin ligase 2
200956_s_at	2.14e-13	6.73e-15	10.1069	23.4975	0.720461	SSRP1	structure specific recognition protein 1
221541_at	2.17e-13	6.81e-15	-10.1041	23.4865	-1.22596	CRISPLD2	cysteine rich secretory protein LCCL domain containing 2
217525_at	2.18e-13	6.85e-15	-10.1025	23.4801	-2.0731	OLFML1	olfactomedin like 1
202754_at	2.21e-13	6.95e-15	10.0987	23.4655	0.554953	R3HDM1	R3H domain containing 1
210651_s_at	2.21e-13	6.97e-15	10.0982	23.4636	0.968663	EPHB2	EPH receptor B2
209588_at	2.23e-13	7.02e-15	10.0965	23.4566	1.1868	EPHB2	EPH receptor B2
212055_at	2.23e-13	7.03e-15	10.0958	23.454	1.07845	TPGS2	tubulin polyglutamylase complex subunit 2
201930_at	2.25e-13	7.08e-15	10.094	23.447	1.03263	MCM6	minichromosome maintenance complex component 6
231154_x_at	2.26e-13	7.13e-15	-10.0923	23.4404	-1.57268	TINAG	tubulointerstitial nephritis antigen
228955_at	2.26e-13	7.13e-15	10.0922	23.4399	2.63408	LRP8	LDL receptor related protein 8
209355_s_at	2.26e-13	7.15e-15	-10.0918	23.4383	-1.11739	PLPP3	phospholipid phosphatase 3
204963_at	2.29e-13	7.23e-15	-10.0889	23.4269	-1.41951	SSPN	sarcospan
202821_s_at	2.29e-13	7.23e-15	-10.0887	23.4265	-0.802908	LPP	LIM domain containing preferred translocation partner in lipoma
206953_s_at	2.3e-13	7.27e-15	-10.0873	23.4207	-2.11558	ADGRL2	adhesion G protein-coupled receptor L2
201091_s_at	2.3e-13	7.3e-15	10.0865	23.4175	0.834479	CBX3	chromobox 3
219954_s_at	2.32e-13	7.35e-15	-10.0847	23.4107	-3.0175	GBA3	glucosylceramidase beta 3 (gene/pseudogene)
200896_x_at	2.33e-13	7.38e-15	10.0836	23.4062	0.686675	HDGF	hepatoma-derived growth factor
229064_s_at	2.33e-13	7.39e-15	10.0833	23.405	0.892084	RCAN3	RCAN family member 3
202718_at	2.34e-13	7.42e-15	10.0821	23.4006	2.59811	IGFBP2	insulin like growth factor binding protein 2
226607_at	2.37e-13	7.52e-15	-10.0789	23.3878	-1.90705	C20orf194	chromosome 20 open reading frame 194
211506_s_at	2.4e-13	7.64e-15	10.0746	23.3712	3.68831	CXCL8	C-X-C motif chemokine ligand 8
201644_at	2.41e-13	7.67e-15	10.0737	23.3674	1.02844	TSTA3	tissue specific transplantation antigen P35B
202488_s_at	2.42e-13	7.71e-15	-10.0726	23.3632	-1.3618	FXYD3	FXYD domain containing ion transport regulator 3
200679_x_at	2.44e-13	7.78e-15	10.0703	23.3542	0.644444	HMGB1	high mobility group box 1
202231_at	2.46e-13	7.83e-15	10.0685	23.3471	0.634478	EIF3M	eukaryotic translation initiation factor 3 subunit M
1554696_s_at	2.47e-13	7.87e-15	10.0671	23.3417	1.36751	TYMS	thymidylate synthetase
205463_s_at	2.5e-13	7.97e-15	-10.064	23.3295	-1.13964	PDGFA	platelet derived growth factor subunit A
200826_at	2.51e-13	8.01e-15	10.0628	23.3249	0.729792	SNRPD2	small nuclear ribonucleoprotein D2 polypeptide
208817_at	2.51e-13	8.02e-15	10.0624	23.3232	0.890988	COMT	catechol-O-methyltransferase
218119_at	2.54e-13	8.11e-15	10.0597	23.3126	0.671063	TIMM23B///TIMM23	translocase of inner mitochondrial membrane 23 homolog B///translocase of inner mitochondrial membrane 23
217827_s_at	2.55e-13	8.15e-15	10.0584	23.3077	0.657971	SPG21	spastic paraplegia 21 (autosomal recessive, Mast syndrome)
228592_at	2.59e-13	8.27e-15	-10.0547	23.293	-3.76091	MS4A1	membrane spanning 4-domains A1
203799_at	2.62e-13	8.37e-15	-10.0516	23.2807	-1.24911	LY75-CD302///CD302///LY75	LY75-CD302 readthrough///CD302 molecule///lymphocyte antigen 75
224129_s_at	2.63e-13	8.43e-15	10.0498	23.2737	0.599191	DPY30	dpy-30, histone methyltransferase complex regulatory subunit
1555231_a_at	2.65e-13	8.48e-15	-10.0482	23.2675	-4.04903	B3GALT5-AS1	B3GALT5 antisense RNA 1
226283_at	2.67e-13	8.58e-15	10.0455	23.2569	1.01986	POC1B	POC1 centriolar protein B
207238_s_at	2.72e-13	8.73e-15	-10.0409	23.2389	-1.67639	PTPRC	protein tyrosine phosphatase, receptor type C
235004_at	2.76e-13	8.86e-15	-10.0371	23.224	-3.06189	RBM24	RNA binding motif protein 24
218575_at	2.77e-13	8.91e-15	10.0359	23.2192	0.827371	LOC730268///ANAPC1	anaphase-promoting complex subunit 1-like///anaphase promoting complex subunit 1
236586_at	2.78e-13	8.94e-15	-10.0348	23.2152	-1.72634
227314_at	2.83e-13	9.08e-15	10.0308	23.1995	1.39645	ITGA2	integrin subunit alpha 2
209791_at	2.83e-13	9.12e-15	-10.0299	23.1957	-1.88993	PADI2	peptidyl arginine deiminase 2
225030_at	2.83e-13	9.12e-15	10.0298	23.1956	0.719534	BOD1	biorientation of chromosomes in cell division 1
206950_at	2.84e-13	9.13e-15	-10.0295	23.1943	-3.13609	SCN9A	sodium voltage-gated channel alpha subunit 9
238533_at	2.87e-13	9.25e-15	-10.0262	23.1813	-2.74101	EPHA7	EPH receptor A7
239587_at	2.88e-13	9.28e-15	-10.0253	23.1778	-1.03019	TLR3	toll like receptor 3
227719_at	2.89e-13	9.33e-15	10.0241	23.1729	1.31849	SMAD9	SMAD family member 9
228846_at	2.93e-13	9.46e-15	-10.0206	23.1595	-1.37959	MXD1	MAX dimerization protein 1
204451_at	3.02e-13	9.77e-15	-10.0125	23.1277	-1.02647	FZD1	frizzled class receptor 1
225663_at	3.03e-13	9.78e-15	10.012	23.1257	0.625734	ACBD5	acyl-CoA binding domain containing 5
218842_at	3.04e-13	9.82e-15	10.011	23.1219	0.688759	RPAP3	RNA polymerase II associated protein 3
201458_s_at	3.07e-13	9.94e-15	10.008	23.11	0.591732	BUB3	BUB3, mitotic checkpoint protein
226560_at	3.13e-13	1.01e-14	-10.0028	23.0894	-0.779647	SGPP2	sphingosine-1-phosphate phosphatase 2
220468_at	3.14e-13	1.02e-14	-10.0025	23.0882	-1.11756	ARL14	ADP ribosylation factor like GTPase 14
229313_at	3.16e-13	1.03e-14	-10.0001	23.0788	-3.49837	ANO5	anoctamin 5
223490_s_at	3.17e-13	1.03e-14	9.99958	23.0769	1.01253	EXOSC3	exosome component 3
218355_at	3.24e-13	1.05e-14	9.99347	23.0529	1.20326	KIF4A	kinesin family member 4A
223098_s_at	3.27e-13	1.06e-14	9.99111	23.0436	0.696008	LOC100507577///LONP2	uncharacterized LOC100507577///lon peptidase 2, peroxisomal
200079_s_at	3.3e-13	1.07e-14	9.98909	23.0357	0.697083	KARS	lysyl-tRNA synthetase
208029_s_at	3.31e-13	1.08e-14	9.98781	23.0306	0.95377	LAPTM4B	lysosomal protein transmembrane 4 beta
222043_at	3.32e-13	1.08e-14	-9.98725	23.0285	-2.14264	CLU	clusterin
208396_s_at	3.33e-13	1.08e-14	-9.98598	23.0235	-1.88628	PDE1A	phosphodiesterase 1A
200692_s_at	3.33e-13	1.09e-14	9.98571	23.0224	0.559911	HSPA9	heat shock protein family A (Hsp70) member 9
206349_at	3.35e-13	1.09e-14	-9.98457	23.0179	-3.52909	LGI1	leucine rich glioma inactivated 1
1568600_at	3.35e-13	1.09e-14	-9.98399	23.0157	-0.707519	CALML4	calmodulin like 4
202815_s_at	3.37e-13	1.1e-14	-9.98248	23.0097	-0.808039	HEXIM1	hexamethylene bisacetamide inducible 1
224930_x_at	3.39e-13	1.11e-14	9.98092	23.0036	0.621947	SNORD24///SNORD36A///SNORD36B///RPL7A	small nucleolar RNA, C/D box 24///small nucleolar RNA, C/D box 36A///small nucleolar RNA, C/D box 36B///ribosomal protein L7a
208951_at	3.39e-13	1.11e-14	9.98077	23.003	0.912852	ALDH7A1	aldehyde dehydrogenase 7 family member A1
228478_at	3.4e-13	1.11e-14	-9.98004	23.0001	-1.22131	SPPL2A	signal peptide peptidase like 2A
218065_s_at	3.41e-13	1.11e-14	-9.9793	22.9972	-0.611329	TMEM9B	TMEM9 domain family member B
227379_at	3.44e-13	1.12e-14	-9.97701	22.9883	-0.869505	MBOAT1	membrane bound O-acyltransferase domain containing 1
201870_at	3.49e-13	1.14e-14	9.97275	22.9715	0.680568	TOMM34	translocase of outer mitochondrial membrane 34
222742_s_at	3.51e-13	1.15e-14	9.97099	22.9646	0.844651	IFT22	intraflagellar transport 22
205565_s_at	3.52e-13	1.15e-14	9.9705	22.9627	0.888676	FXN	frataxin
225803_at	3.52e-13	1.15e-14	-9.97041	22.9623	-1.45288	FBXO32	F-box protein 32
214662_at	3.52e-13	1.16e-14	9.96991	22.9604	0.792968	WDR43	WD repeat domain 43
223454_at	3.53e-13	1.16e-14	9.96929	22.9579	1.00879	CXCL16	C-X-C motif chemokine ligand 16
236123_at	3.55e-13	1.17e-14	-9.96748	22.9508	-1.53024	WNT2B	Wnt family member 2B
219065_s_at	3.56e-13	1.17e-14	9.96698	22.9488	0.544456	DPY30///MEMO1	dpy-30, histone methyltransferase complex regulatory subunit///mediator of cell motility 1
201009_s_at	3.56e-13	1.17e-14	-9.96663	22.9475	-0.948	TXNIP	thioredoxin interacting protein
219747_at	3.57e-13	1.17e-14	-9.96595	22.9448	-1.53133	NDNF	neuron derived neurotrophic factor
223556_at	3.58e-13	1.18e-14	9.96509	22.9414	1.53132	HELLS	helicase, lymphoid-specific
221667_s_at	3.58e-13	1.18e-14	-9.96458	22.9394	-1.3375	HSPB8	heat shock protein family B (small) member 8
1556078_at	3.59e-13	1.18e-14	-9.96381	22.9364	-1.21018	LOC143286	uncharacterized LOC143286
208158_s_at	3.61e-13	1.19e-14	-9.9622	22.9301	-1.04372	OSBPL1A	oxysterol binding protein like 1A
243299_at	3.67e-13	1.21e-14	9.95832	22.9148	1.24143
228009_x_at	3.73e-13	1.23e-14	9.95374	22.8968	0.593998	ZNRD1	zinc ribbon domain containing 1
207455_at	3.73e-13	1.23e-14	-9.95361	22.8964	-1.19089	P2RY1	purinergic receptor P2Y1
221521_s_at	3.76e-13	1.24e-14	9.95174	22.889	1.19733	GINS2	GINS complex subunit 2
227761_at	3.83e-13	1.26e-14	-9.947	22.8704	-1.16919	MYO5A	myosin VA
219460_s_at	3.86e-13	1.28e-14	-9.9444	22.8601	-0.642647	TMEM127	transmembrane protein 127
209555_s_at	3.87e-13	1.28e-14	-9.94345	22.8564	-2.16365	CD36	CD36 molecule
206171_at	3.87e-13	1.28e-14	-9.94344	22.8564	-1.54137	ADORA3	adenosine A3 receptor
226688_at	3.88e-13	1.28e-14	9.94308	22.855	0.798601	TCAIM	T-cell activation inhibitor, mitochondrial
229889_at	3.96e-13	1.31e-14	-9.93748	22.8329	-0.981771	LRRC75A	leucine rich repeat containing 75A
224915_x_at	4e-13	1.33e-14	9.93472	22.8221	0.990468	ZFAS1	ZNFX1 antisense RNA 1
202192_s_at	4.06e-13	1.35e-14	-9.9313	22.8087	-1.34536	GAS7	growth arrest specific 7
227163_at	4.09e-13	1.36e-14	9.92901	22.7996	0.917562	GSTO2	glutathione S-transferase omega 2
225059_at	4.14e-13	1.37e-14	9.926	22.7878	1.02601	AGTRAP	angiotensin II receptor associated protein
209396_s_at	4.14e-13	1.38e-14	9.92548	22.7858	3.88602	CHI3L1	chitinase 3 like 1
212385_at	4.17e-13	1.39e-14	-9.92393	22.7797	-1.43633	TCF4	transcription factor 4
228007_at	4.23e-13	1.41e-14	-9.91984	22.7636	-1.54146	CEP85L	centrosomal protein 85 like
218051_s_at	4.32e-13	1.44e-14	9.91475	22.7436	1.17138	NT5DC2	5'-nucleotidase domain containing 2
228729_at	4.38e-13	1.46e-14	9.91079	22.728	1.33973	CCNB1	cyclin B1
200878_at	4.38e-13	1.46e-14	-9.91057	22.7271	-0.73746	EPAS1	endothelial PAS domain protein 1
205774_at	4.39e-13	1.46e-14	9.91002	22.725	1.32272	F12	coagulation factor XII
212387_at	4.43e-13	1.48e-14	-9.90754	22.7152	-1.34747	TCF4	transcription factor 4
218238_at	4.44e-13	1.48e-14	9.9068	22.7123	0.919521	GTPBP4	GTP binding protein 4
213241_at	4.45e-13	1.49e-14	-9.90629	22.7103	-1.1352	PLXNC1	plexin C1
222750_s_at	4.45e-13	1.49e-14	9.90627	22.7102	1.11482	SRD5A3	steroid 5 alpha-reductase 3
209868_s_at	4.45e-13	1.49e-14	-9.90573	22.7081	-1.10367	RBMS1	RNA binding motif single stranded interacting protein 1
200990_at	4.47e-13	1.49e-14	9.90484	22.7046	0.847039	TRIM28	tripartite motif containing 28
224480_s_at	4.47e-13	1.5e-14	-9.90463	22.7038	-1.50573	GPAT3	glycerol-3-phosphate acyltransferase 3
218782_s_at	4.5e-13	1.51e-14	9.9027	22.6962	1.30638	ATAD2	ATPase family, AAA domain containing 2
205349_at	4.52e-13	1.51e-14	9.90152	22.6915	1.33286	GNA15	G protein subunit alpha 15
235153_at	4.55e-13	1.52e-14	9.89971	22.6844	2.12415	RNF183	ring finger protein 183
209228_x_at	4.59e-13	1.54e-14	-9.89752	22.6758	-2.09178	TUSC3	tumor suppressor candidate 3
219519_s_at	4.6e-13	1.54e-14	-9.89653	22.6719	-2.75868	SIGLEC1	sialic acid binding Ig like lectin 1
201948_at	4.6e-13	1.54e-14	9.89653	22.6719	0.765322	GNL2	G protein nucleolar 2
229084_at	4.6e-13	1.54e-14	-9.89652	22.6719	-2.34562	CNTN4	contactin 4
206550_s_at	4.6e-13	1.55e-14	9.89626	22.6708	0.810998	NUP155	nucleoporin 155
224355_s_at	4.65e-13	1.56e-14	-9.89352	22.6601	-2.47452	MS4A8	membrane spanning 4-domains A8
225580_at	4.65e-13	1.56e-14	9.89341	22.6597	0.967657	MRPL50	mitochondrial ribosomal protein L50
203046_s_at	4.65e-13	1.57e-14	9.89287	22.6575	0.943302	TIMELESS	timeless circadian clock
225924_at	4.66e-13	1.57e-14	-9.89251	22.6561	-0.816469	FNIP2	folliculin interacting protein 2
225757_s_at	4.78e-13	1.61e-14	-9.88544	22.6283	-1.29389	CLMN	calmin
206150_at	4.78e-13	1.61e-14	-9.88536	22.628	-1.63615	CD27	CD27 molecule
224606_at	4.81e-13	1.62e-14	-9.88397	22.6225	-0.882878	KLF6	Kruppel like factor 6
209018_s_at	4.9e-13	1.65e-14	-9.87931	22.6042	-0.888625	PINK1	PTEN induced putative kinase 1
203957_at	4.9e-13	1.65e-14	9.87906	22.6032	0.890995	E2F6	E2F transcription factor 6
202274_at	4.94e-13	1.67e-14	-9.87678	22.5942	-1.75078	ACTG2	actin, gamma 2, smooth muscle, enteric
228323_at	4.95e-13	1.67e-14	9.87596	22.591	1.22302	KNL1	kinetochore scaffold 1
218418_s_at	4.99e-13	1.69e-14	-9.87369	22.582	-0.841968	KANK2	KN motif and ankyrin repeat domains 2
1555780_a_at	5.12e-13	1.73e-14	9.86728	22.5568	0.701005	RHEB	Ras homolog enriched in brain
236389_x_at	5.14e-13	1.74e-14	-9.86638	22.5533	-2.48962
201477_s_at	5.18e-13	1.76e-14	9.86402	22.544	0.890646	RRM1	ribonucleotide reductase catalytic subunit M1
202043_s_at	5.2e-13	1.76e-14	9.8631	22.5403	0.695994	SMS	spermine synthase
201630_s_at	5.22e-13	1.77e-14	9.86165	22.5347	0.572966	ACP1	acid phosphatase 1, soluble
224990_at	5.24e-13	1.78e-14	-9.86099	22.532	-0.965983	SMIM14	small integral membrane protein 14
217774_s_at	5.24e-13	1.78e-14	9.86042	22.5298	0.756592	TRMT112	tRNA methyltransferase 11-2 homolog (S. cerevisiae)
56197_at	5.25e-13	1.78e-14	9.86014	22.5287	0.776408	TMEM256-PLSCR3///PLSCR3	TMEM256-PLSCR3 readthrough (NMD candidate)///phospholipid scramblase 3
1554628_at	5.3e-13	1.8e-14	-9.85746	22.5182	-0.727643	ZNF57	zinc finger protein 57
208393_s_at	5.31e-13	1.81e-14	9.85684	22.5157	0.662542	RAD50	RAD50 double strand break repair protein
222433_at	5.31e-13	1.81e-14	9.85682	22.5156	0.871675	ENAH	enabled homolog (Drosophila)
215716_s_at	5.52e-13	1.88e-14	-9.84665	22.4756	-1.01032	ATP2B1	ATPase plasma membrane Ca2+ transporting 1
224955_at	5.55e-13	1.89e-14	9.84508	22.4694	0.72289	TEAD1	TEA domain transcription factor 1
208822_s_at	5.58e-13	1.9e-14	9.84379	22.4643	0.663402	DAP3	death associated protein 3
203964_at	5.6e-13	1.91e-14	9.8429	22.4608	0.701725	NMI	N-myc and STAT interactor
228827_at	5.6e-13	1.91e-14	-9.84251	22.4593	-2.06257	RUNX1T1	RUNX1 translocation partner 1
218875_s_at	5.65e-13	1.93e-14	9.84028	22.4505	0.912137	FBXO5	F-box protein 5
225132_at	5.68e-13	1.94e-14	-9.83872	22.4443	-0.845209	FBXL3	F-box and leucine rich repeat protein 3
201231_s_at	5.77e-13	1.97e-14	9.83475	22.4287	0.816517	ENO1	enolase 1
202580_x_at	5.81e-13	1.99e-14	9.833	22.4218	1.45786	FOXM1	forkhead box M1
227198_at	5.81e-13	1.99e-14	-9.83266	22.4205	-3.41154	AFF3	AF4/FMR2 family member 3
201554_x_at	5.81e-13	1.99e-14	9.83241	22.4195	0.671535	GYG1	glycogenin 1
225840_at	5.82e-13	1.99e-14	-9.83198	22.4178	-1.00153	TEF	TEF, PAR bZIP transcription factor
201161_s_at	5.84e-13	2e-14	9.83094	22.4137	0.67808	YBX3	Y-box binding protein 3
204444_at	5.95e-13	2.04e-14	9.82594	22.394	1.07695	KIF11	kinesin family member 11
228559_at	5.98e-13	2.05e-14	9.82486	22.3897	1.27376	CENPN	centromere protein N
225837_at	6.11e-13	2.1e-14	9.81926	22.3676	0.641924	RHNO1	RAD9-HUS1-RAD1 interacting nuclear orphan 1
218073_s_at	6.12e-13	2.1e-14	9.8185	22.3647	0.794082	NDC1	NDC1 transmembrane nucleoporin
233080_s_at	6.17e-13	2.12e-14	9.81659	22.3571	0.558181	PRPF40A	pre-mRNA processing factor 40 homolog A
231784_s_at	6.17e-13	2.12e-14	9.81635	22.3562	0.822385	DCAF13	DDB1 and CUL4 associated factor 13
224747_at	6.21e-13	2.14e-14	9.81466	22.3495	0.615537	UBE2Q2	ubiquitin conjugating enzyme E2 Q2
218308_at	6.22e-13	2.14e-14	9.81378	22.3461	1.26052	TACC3	transforming acidic coiled-coil containing protein 3
209107_x_at	6.31e-13	2.17e-14	-9.8101	22.3316	-0.794546	NCOA1	nuclear receptor coactivator 1
225240_s_at	6.34e-13	2.18e-14	9.80896	22.3271	0.663385	MSI2	musashi RNA binding protein 2
204964_s_at	6.38e-13	2.2e-14	-9.80707	22.3196	-1.63467	SSPN	sarcospan
205544_s_at	6.45e-13	2.23e-14	-9.80412	22.308	-3.762	CR2	complement component 3d receptor 2
208336_s_at	6.47e-13	2.23e-14	9.80331	22.3048	0.471554	TECR	trans-2,3-enoyl-CoA reductase
204354_at	6.5e-13	2.25e-14	9.80186	22.2991	0.723971	POT1	protection of telomeres 1
201833_at	6.62e-13	2.29e-14	9.79728	22.281	0.690297	HDAC2	histone deacetylase 2
203016_s_at	6.65e-13	2.3e-14	9.7959	22.2756	0.908819	SSX2IP	SSX family member 2 interacting protein
226225_at	6.65e-13	2.3e-14	-9.79584	22.2753	-1.45852	MCC	mutated in colorectal cancers
235504_at	6.71e-13	2.32e-14	-9.79361	22.2665	-2.49702	GREM2	gremlin 2, DAN family BMP antagonist
202338_at	6.77e-13	2.34e-14	9.79113	22.2568	1.20983	TK1	thymidine kinase 1
216598_s_at	6.81e-13	2.36e-14	-9.78956	22.2506	-1.69939	CCL2	C-C motif chemokine ligand 2
223782_s_at	6.83e-13	2.37e-14	-9.78852	22.2465	-1.75792	TINAG	tubulointerstitial nephritis antigen
228810_at	6.85e-13	2.37e-14	-9.78783	22.2438	-0.87698	CCNYL1	cyclin Y like 1
211921_x_at	7.08e-13	2.46e-14	9.77938	22.2104	0.616861	LOC100506248///MIR1244-2///MIR1244-3///MIR1244-1///LOC728026///PTMA	prothymosin alpha///microRNA 1244-2///microRNA 1244-3///microRNA 1244-1///prothymosin alpha-like///prothymosin, alpha
225547_at	7.08e-13	2.46e-14	9.77927	22.21	0.812972	SNORD87///SNHG6	small nucleolar RNA, C/D box 87///small nucleolar RNA host gene 6
209294_x_at	7.08e-13	2.46e-14	9.77915	22.2095	1.34577	TNFRSF10B	TNF receptor superfamily member 10b
205111_s_at	7.09e-13	2.46e-14	-9.77851	22.207	-1.08563	PLCE1	phospholipase C epsilon 1
1554178_a_at	7.1e-13	2.47e-14	-9.77793	22.2047	-0.938406	FAM126B	family with sequence similarity 126 member B
201725_at	7.11e-13	2.47e-14	9.77743	22.2028	0.733253	CDC123	cell division cycle 123
214794_at	7.12e-13	2.48e-14	9.77697	22.2009	0.903028	PA2G4	proliferation-associated 2G4
219489_s_at	7.16e-13	2.5e-14	-9.77537	22.1946	-1.2918	NXN	nucleoredoxin
217732_s_at	7.26e-13	2.53e-14	-9.77185	22.1807	-0.565617	ITM2B	integral membrane protein 2B
239231_at	7.31e-13	2.55e-14	-9.76994	22.1732	-0.760867	ZNF101	zinc finger protein 101
205125_at	7.38e-13	2.57e-14	-9.7676	22.164	-0.904726	PLCD1	phospholipase C delta 1
205282_at	7.39e-13	2.58e-14	9.76693	22.1613	1.86775	LRP8	LDL receptor related protein 8
228299_at	7.52e-13	2.63e-14	9.76255	22.1441	0.667843	KCTD20	potassium channel tetramerization domain containing 20
1555832_s_at	7.54e-13	2.63e-14	-9.76176	22.1409	-0.74269	KLF6	Kruppel like factor 6
214280_x_at	7.56e-13	2.64e-14	9.76104	22.1381	0.627198	HNRNPA1	heterogeneous nuclear ribonucleoprotein A1
207542_s_at	7.58e-13	2.65e-14	-9.76024	22.1349	-1.54163	AQP1	aquaporin 1 (Colton blood group)
218477_at	7.85e-13	2.75e-14	9.75114	22.099	0.680476	TMEM14A	transmembrane protein 14A
201150_s_at	7.89e-13	2.76e-14	-9.7496	22.0929	-1.50352	TIMP3	TIMP metallopeptidase inhibitor 3
218035_s_at	7.93e-13	2.78e-14	-9.74836	22.0881	-0.765077	RBM47	RNA binding motif protein 47
210416_s_at	7.97e-13	2.79e-14	9.74691	22.0823	0.886262	CHEK2	checkpoint kinase 2
220651_s_at	7.97e-13	2.79e-14	9.74677	22.0818	1.74539	MCM10	minichromosome maintenance 10 replication initiation factor
223344_s_at	8.02e-13	2.81e-14	-9.74516	22.0754	-1.90468	MS4A7	membrane spanning 4-domains A7
209096_at	8.03e-13	2.82e-14	9.74469	22.0735	0.727108	UBE2V2	ubiquitin conjugating enzyme E2 V2
235349_at	8.19e-13	2.88e-14	-9.73954	22.0532	-1.15081	RMDN2	regulator of microtubule dynamics 2
213940_s_at	8.19e-13	2.88e-14	-9.73945	22.0529	-1.23088	FNBP1	formin binding protein 1
231021_at	8.22e-13	2.89e-14	-9.73841	22.0488	-3.13212	SLC6A19	solute carrier family 6 member 19
212262_at	8.27e-13	2.91e-14	-9.73666	22.0419	-1.11062	QKI	QKI, KH domain containing RNA binding
219418_at	8.29e-13	2.92e-14	-9.73605	22.0394	-0.892486	SLC23A3///NHEJ1	solute carrier family 23 member 3///non-homologous end joining factor 1
202159_at	8.32e-13	2.93e-14	9.735	22.0353	0.784557	FARSA	phenylalanyl-tRNA synthetase alpha subunit
202976_s_at	8.32e-13	2.93e-14	9.73479	22.0345	1.23281	RHOBTB3	Rho related BTB domain containing 3
202796_at	8.42e-13	2.97e-14	-9.73158	22.0218	-1.33384	SYNPO	synaptopodin
213581_at	8.42e-13	2.97e-14	9.73148	22.0214	0.637374	PDCD2	programmed cell death 2
208694_at	8.46e-13	2.99e-14	9.73011	22.016	0.786082	PRKDC	protein kinase, DNA-activated, catalytic polypeptide
239409_at	8.48e-13	2.99e-14	-9.72956	22.0138	-1.3088
219338_s_at	8.49e-13	3e-14	9.72894	22.0114	0.81073	LRRC49	leucine rich repeat containing 49
236783_at	8.51e-13	3.01e-14	-9.72836	22.0091	-2.36921	KCNIP4	potassium voltage-gated channel interacting protein 4
209758_s_at	8.54e-13	3.02e-14	-9.7272	22.0045	-1.96454	MFAP5	microfibrillar associated protein 5
229551_x_at	8.61e-13	3.05e-14	9.72514	21.9964	1.46073	ZNF367	zinc finger protein 367
223086_x_at	8.63e-13	3.05e-14	9.72445	21.9937	0.495609	MRPL51	mitochondrial ribosomal protein L51
206710_s_at	8.87e-13	3.14e-14	-9.71734	21.9656	-3.03904	EPB41L3	erythrocyte membrane protein band 4.1 like 3
204237_at	8.9e-13	3.15e-14	-9.7165	21.9623	-2.2097	GULP1	GULP, engulfment adaptor PTB domain containing 1
218232_at	8.9e-13	3.15e-14	-9.71627	21.9614	-1.33978	C1QA	complement C1q A chain
1553535_a_at	8.92e-13	3.16e-14	9.71555	21.9585	0.872203	RANGAP1	Ran GTPase activating protein 1
211115_x_at	8.94e-13	3.17e-14	9.71489	21.9559	0.685129	GEMIN2	gem nuclear organelle associated protein 2
225667_s_at	8.95e-13	3.18e-14	9.71456	21.9546	0.825346	FAM84A	family with sequence similarity 84 member A
205219_s_at	9.05e-13	3.22e-14	9.71143	21.9422	0.786367	GALK2	galactokinase 2
212597_s_at	9.12e-13	3.24e-14	9.70958	21.9349	0.50015	HMGXB4	HMG-box containing 4
209527_at	9.16e-13	3.26e-14	9.70811	21.9291	0.743098	EXOSC2	exosome component 2
202854_at	9.27e-13	3.3e-14	9.70506	21.9171	0.824478	HPRT1	hypoxanthine phosphoribosyltransferase 1
211300_s_at	9.27e-13	3.3e-14	9.705	21.9168	0.879133	TP53	tumor protein p53
221787_at	9.28e-13	3.31e-14	-9.70449	21.9148	-0.708381	C6orf120	chromosome 6 open reading frame 120
201457_x_at	9.4e-13	3.35e-14	9.70107	21.9013	0.635209	BUB3	BUB3, mitotic checkpoint protein
225253_s_at	9.41e-13	3.35e-14	9.70088	21.9006	0.482541	METTL2A///METTL2B	methyltransferase like 2A///methyltransferase like 2B
224411_at	9.55e-13	3.41e-14	-9.69686	21.8847	-2.75784	PLA2G12B	phospholipase A2 group XIIB
225227_at	9.62e-13	3.43e-14	9.69501	21.8774	1.06959	SKIL	SKI-like proto-oncogene
224247_s_at	9.64e-13	3.44e-14	9.69442	21.875	0.650536	MRPS10	mitochondrial ribosomal protein S10
221577_x_at	9.65e-13	3.45e-14	9.69408	21.8737	1.89333	GDF15	growth differentiation factor 15
221610_s_at	9.65e-13	3.45e-14	-9.69384	21.8727	-0.955356	STAP2	signal transducing adaptor family member 2
216306_x_at	9.65e-13	3.45e-14	9.69359	21.8718	0.506905	MIR4745///PTBP1	microRNA 4745///polypyrimidine tract binding protein 1
231669_at	9.7e-13	3.47e-14	-9.69213	21.866	-1.51332	SEPP1	selenoprotein P, plasma, 1
201587_s_at	9.7e-13	3.47e-14	9.69205	21.8657	0.7415	IRAK1	interleukin 1 receptor associated kinase 1
217919_s_at	9.71e-13	3.48e-14	9.69167	21.8642	0.717638	MRPL42	mitochondrial ribosomal protein L42
216417_x_at	9.72e-13	3.48e-14	9.69133	21.8628	1.00457	HOXB9	homeobox B9
225674_at	9.77e-13	3.5e-14	-9.68983	21.8569	-0.830143	BCAP29	B-cell receptor-associated protein 29
217783_s_at	9.81e-13	3.52e-14	-9.68883	21.8529	-0.557441	YPEL5	yippee like 5
210072_at	9.9e-13	3.55e-14	-9.68638	21.8433	-3.79102	CCL19	C-C motif chemokine ligand 19
204401_at	9.95e-13	3.57e-14	9.685	21.8378	1.11351	KCNN4	potassium calcium-activated channel subfamily N member 4
226865_at	1e-12	3.6e-14	-9.68317	21.8306	-1.22195	PLXDC2	plexin domain containing 2
218573_at	1e-12	3.6e-14	-9.68291	21.8295	-1.59493	MAGEH1	MAGE family member H1
232617_at	1e-12	3.61e-14	-9.6821	21.8263	-0.874311	CTSS	cathepsin S
226385_s_at	1.01e-12	3.62e-14	9.6814	21.8236	0.562149	MALSU1	mitochondrial assembly of ribosomal large subunit 1
232181_at	1.01e-12	3.62e-14	-9.68134	21.8234	-0.917488	PPARGC1B	PPARG coactivator 1 beta
219737_s_at	1.02e-12	3.69e-14	-9.67699	21.8062	-2.64776	PCDH9	protocadherin 9
209442_x_at	1.02e-12	3.69e-14	-9.67676	21.8052	-1.17065	ANK3	ankyrin 3, node of Ranvier (ankyrin G)
205450_at	1.03e-12	3.72e-14	9.67455	21.7965	1.52119	PHKA1	phosphorylase kinase regulatory subunit alpha 1
206052_s_at	1.04e-12	3.74e-14	9.67325	21.7914	0.728012	SLBP	stem-loop binding protein
212265_at	1.04e-12	3.75e-14	-9.67295	21.7902	-1.3034	QKI	QKI, KH domain containing RNA binding
207233_s_at	1.04e-12	3.76e-14	-9.67224	21.7874	-1.01713	MITF	melanogenesis associated transcription factor
205159_at	1.04e-12	3.76e-14	-9.67206	21.7866	-1.31866	CSF2RB	colony stimulating factor 2 receptor beta common subunit
218511_s_at	1.04e-12	3.76e-14	9.67191	21.7861	0.575738	PNPO	pyridoxamine 5'-phosphate oxidase
209481_at	1.05e-12	3.79e-14	-9.66991	21.7782	-0.66476	SNRK	SNF related kinase
202533_s_at	1.07e-12	3.87e-14	9.66482	21.758	1.10784	DHFR	dihydrofolate reductase
228069_at	1.07e-12	3.89e-14	9.66378	21.7539	1.29294	MTFR2	mitochondrial fission regulator 2
205896_at	1.08e-12	3.92e-14	-9.66186	21.7463	-2.42133	SLC22A4	solute carrier family 22 member 4
200986_at	1.08e-12	3.92e-14	-9.66174	21.7459	-1.21532	SERPING1	serpin family G member 1
223201_s_at	1.08e-12	3.93e-14	-9.66094	21.7427	-0.804456	LOC101928589///TMEM164	uncharacterized LOC101928589///transmembrane protein 164
206249_at	1.09e-12	3.94e-14	-9.66042	21.7406	-0.826597	MAP3K13	mitogen-activated protein kinase kinase kinase 13
217966_s_at	1.09e-12	3.97e-14	-9.65844	21.7328	-1.64205	FAM129A	family with sequence similarity 129 member A
36936_at	1.09e-12	3.97e-14	9.65827	21.7321	0.966837	TSTA3	tissue specific transplantation antigen P35B
221520_s_at	1.11e-12	4.03e-14	9.65447	21.7171	1.08197	CDCA8	cell division cycle associated 8
236308_at	1.11e-12	4.04e-14	-9.65388	21.7148	-2.60311	VSTM2A	V-set and transmembrane domain containing 2A
220306_at	1.12e-12	4.06e-14	-9.65287	21.7108	-1.20942	FAM46C	family with sequence similarity 46 member C
207714_s_at	1.12e-12	4.07e-14	9.65212	21.7078	1.11507	SERPINH1	serpin family H member 1
209575_at	1.12e-12	4.08e-14	-9.65175	21.7064	-0.712719	IL10RB	interleukin 10 receptor subunit beta
202219_at	1.14e-12	4.14e-14	-9.6476	21.6899	-1.7369	SLC6A8	solute carrier family 6 member 8
201584_s_at	1.14e-12	4.17e-14	9.64629	21.6848	0.820488	DDX39A	DEAD-box helicase 39A
221861_at	1.16e-12	4.24e-14	-9.64165	21.6664	-1.42019	ARRB1	arrestin beta 1
211658_at	1.17e-12	4.28e-14	9.63972	21.6588	1.25381	PRDX2	peroxiredoxin 2
223639_s_at	1.18e-12	4.29e-14	9.63905	21.6561	0.599198	ZNRD1	zinc ribbon domain containing 1
205653_at	1.18e-12	4.3e-14	-9.63842	21.6536	-2.23703	CTSG	cathepsin G
204352_at	1.18e-12	4.31e-14	9.63763	21.6505	1.06373	TRAF5	TNF receptor associated factor 5
229385_s_at	1.18e-12	4.33e-14	-9.63678	21.6472	-1.73879	TINCR	tissue differentiation-inducing non-protein coding RNA
220041_at	1.18e-12	4.33e-14	-9.63649	21.646	-1.40642	PIGZ	phosphatidylinositol glycan anchor biosynthesis class Z
[truncated: 52,676 more rows]

## Sheet: GSE14538
!Series_title	Effect of mesalazine on Caco2 cells
!Series_geo_accession	GSE14538
!Series_status	Public on Jan 23 2010
!Series_submission_date	Jan 23 2009
!Series_last_update_date	Jun 03 2018
!Series_pubmed_id	19785626
!Series_summary	Several reports indicate that mesalazine (5-aminosalicylic acid or 5-ASA) is a promising candidate for the chemoprevention of Colo-Rectal Cancer (CRC) due to its ability to reach the purpose, yet avoiding at the same time the side effects that are usually determined by prolonged administrations of Non Steroidal Anti-Inflammatory Drugs. This activity of 5-ASA is probably the consequence of a numbe…
!Series_overall_design	We used the Affymetrix microarray methodology to assess the transcriptome changes determined on Caco2 cells by a 96 h treatment with 20 mM mesalazine. One sample was treated with mesalazine, and one sample was left untreated.
!Series_type	Expression profiling by array
!Series_contributor	Sandra,,Parenti
!Series_contributor	Fabrizio,,Ferrarini
!Series_contributor	Roberta,,Zini
!Series_contributor	Monica,,Montanari
!Series_contributor	Lorena,,Losi
!Series_contributor	Brenno,,Canovi
!Series_contributor	Sergio,,Ferrari
!Series_contributor	Alexis,,Grande
!Series_sample_id	GSM363782 GSM363784
!Series_contact_name	Alexis,,Grande
!Series_contact_email	alexis.grande@unimore.it
!Series_contact_phone	390592055409
!Series_contact_fax	390592055410
!Series_contact_laboratory	Biological Chemistry Section
!Series_contact_department	Department of Biomedical Sciences
!Series_contact_institute	University of Modena and Reggio Emilia
!Series_contact_address	via Campi n 287
!Series_contact_city	MODENA
!Series_contact_zip/postal_code	41100
!Series_contact_country	Italy
!Series_supplementary_file	ftp://ftp.ncbi.nlm.nih.gov/geo/series/GSE14nnn/GSE14538/suppl/GSE14538_RAW.tar
!Series_platform_id	GPL570
!Series_platform_taxid	9606
!Series_sample_taxid	9606
!Series_relation	BioProject: https://www.ncbi.nlm.nih.gov/bioproject/PRJNA111623
!Sample_title	Caco2, untreated	Caco2, 20 mM 5-ASA 96h
!Sample_geo_accession	GSM363782	GSM363784
!Sample_status	Public on Jan 23 2010	Public on Jan 23 2010
!Sample_submission_date	Jan 23 2009	Jan 23 2009
!Sample_last_update_date	Jan 29 2009	Jan 29 2009
!Sample_type	RNA	RNA
!Sample_channel_count	1	1
!Sample_source_name_ch1	Caco2 cells, untreated	Caco2 cells, treated with mesalazine
!Sample_organism_ch1	Homo sapiens	Homo sapiens
!Sample_characteristics_ch1	Colon cancer cell line	Colon cancer cell line
!Sample_treatment_protocol_ch1	Untreated cells.	5-ASA (SofarFarm S.p.A., Milano, Italy) was dissolved in cell culture medium at concentrations 20 mM. Caco2 cell line was treated with 5-ASA 20mM for 96h.
!Sample_growth_protocol_ch1	The Caco2 cell line was obtained from ATCC (Rockville, MD) and cultured in DMEM medium (Euroclone, Devon, UK), supplemented with 10% heat inactivated fetal bovine serum (Lonza, Walkersvillle, MD) and 1mM L-Glutamine (Euroclone).	The Caco2 cell line was obtained from ATCC (Rockville, MD) and cultured in DMEM medium (Euroclone, Devon, UK), supplemented with 10% heat inactivated fetal bovine serum (Lonza, Walkersvillle, MD) and 1mM L-Glutamine (Euroclone).
!Sample_molecule_ch1	total RNA	total RNA
!Sample_extract_protocol_ch1	Total cellular RNA was extracted from 5-10x105 cells of each sample using RNeasy Mini Kit (Qiagen, Valencia, CA) following the protocol supplied by the manufacturer. Disposable RNA chips (Agilent RNA 6000 Nano LabChip kit, Agilent Technologies, Waldbrunn, Germany) were used to determine the concentration and purity/integrity of RNA samples using Agilent 2100 Bioanalyzer.	Total cellular RNA was extracted from 5-10x105 cells of each sample using RNeasy Mini Kit (Qiagen, Valencia, CA) following the protocol supplied by the manufacturer. Disposable RNA chips (Agilent RNA 6000 Nano LabChip kit, Agilent Technologies, Waldbrunn, Germany) were used to determine the concentration and purity/integrity of RNA samples using Agilent 2100 Bioanalyzer.
!Sample_label_ch1	biotin	biotin
!Sample_label_protocol_ch1	Total RNA (3 µg) of Caco2 cells untreated and treated for 96 hours with 20 mM 5-ASA were converted in biotinylated cRNA according to the one-cycle target labeling protocol advised by Affymetrix (Affymetrix, Santa Clara,CA). Labeled cRNA was purified using Affymetrix GeneChip Sample Cleanup Module and fragmented (15 µg) as described in the Affymetrix GeneChip protocol. Disposable RNA chips (Agilen…	Total RNA (3 µg) of Caco2 cells untreated and treated for 96 hours with 20 mM 5-ASA were converted in biotinylated cRNA according to the one-cycle target labeling protocol advised by Affymetrix (Affymetrix, Santa Clara,CA). Labeled cRNA was purified using Affymetrix GeneChip Sample Cleanup Module and fragmented (15 µg) as described in the Affymetrix GeneChip protocol. Disposable RNA chips (Agilen…
!Sample_taxid_ch1	9606	9606
!Sample_hyb_protocol	The fragmented cRNA was then hybridized to an identical lot of Affymetrix Human HG-U133 Plus 2 GeneChip arrays for 16 hours. GeneChips were washed and stained using the instrument’s standard FS450_0001 protocol, using antibody-mediated signal amplification.	The fragmented cRNA was then hybridized to an identical lot of Affymetrix Human HG-U133 Plus 2 GeneChip arrays for 16 hours. GeneChips were washed and stained using the instrument’s standard FS450_0001 protocol, using antibody-mediated signal amplification.
!Sample_scan_protocol	GeneChip were finally scanned using the Affymetrix GeneChip scanner 3000, enabled for High-Resolution Scanning.	GeneChip were finally scanned using the Affymetrix GeneChip scanner 3000, enabled for High-Resolution Scanning.
!Sample_description	Synthesis of biotinylated cRNA targets, arrays hybridization (Human HG-U133 Plus 2 GeneChip, Affymetrix, Santa Clara,CA), staining and scanning were performed using Affymetrix standard protocols starting from 3µg of total RNA.	Synthesis of biotinylated cRNA targets, arrays hybridization (Human HG-U133 Plus 2 GeneChip, Affymetrix, Santa Clara,CA), staining and scanning were performed using Affymetrix standard protocols starting from 3µg of total RNA.
!Sample_data_processing	Scaling to TGT value=150. The GeneChip-Operating-Software (GCOS) absolute analysis algorithm was used to determine the mRNA expression levels (Signal), while the GCOS comparison analysis algorithm was used in order to compare gene expression levels between two samples.	Scaling to TGT value=150. The GeneChip-Operating-Software (GCOS) absolute analysis algorithm was used to determine the mRNA expression levels (Signal), while the GCOS comparison analysis algorithm was used in order to compare gene expression levels between two samples.
!Sample_platform_id	GPL570	GPL570
!Sample_contact_name	Alexis,,Grande	Alexis,,Grande
!Sample_contact_email	alexis.grande@unimore.it	alexis.grande@unimore.it
!Sample_contact_phone	390592055409	390592055409
!Sample_contact_fax	390592055410	390592055410
!Sample_contact_laboratory	Biological Chemistry Section	Biological Chemistry Section
!Sample_contact_department	Department of Biomedical Sciences	Department of Biomedical Sciences
!Sample_contact_institute	University of Modena and Reggio Emilia	University of Modena and Reggio Emilia
!Sample_contact_address	via Campi n 287	via Campi n 287
!Sample_contact_city	MODENA	MODENA
!Sample_contact_zip/postal_code	41100	41100
!Sample_contact_country	Italy	Italy
!Sample_supplementary_file	ftp://ftp.ncbi.nlm.nih.gov/geo/samples/GSM363nnn/GSM363782/suppl/GSM363782.CEL.gz	ftp://ftp.ncbi.nlm.nih.gov/geo/samples/GSM363nnn/GSM363784/suppl/GSM363784.CEL.gz
!Sample_supplementary_file	ftp://ftp.ncbi.nlm.nih.gov/geo/samples/GSM363nnn/GSM363782/suppl/GSM363782.CHP.gz	ftp://ftp.ncbi.nlm.nih.gov/geo/samples/GSM363nnn/GSM363784/suppl/GSM363784.CHP.gz
!Sample_data_row_count	54675	54675
!series_matrix_table_begin
ID_REF	GSM363782	GSM363784
1007_s_at	889.912	656.502
1053_at	450.321	392.432
117_at	24.509	21.2833
121_at	112.683	124.743
1255_g_at	11.2537	10.8046
1294_at	20.8969	41.9166
1316_at	23.2382	23.2555
1320_at	49.4459	41.8463
1405_i_at	0.658076	2.84701
1431_at	1.53393	15.2482
1438_at	133.174	125.821
1487_at	584.958	640.751
1494_f_at	39.1045	36.1634
1552256_a_at	221.313	251.508
1552257_a_at	507.012	368.713
1552258_at	5.14399	18.9207
1552261_at	106.874	106.026
1552263_at	133.261	180.809
1552264_a_at	290.348	381.646
1552266_at	0.243721	11.9112
1552269_at	5.62057	1.29752
1552271_at	5.95897	6.73684
1552272_a_at	38.494	37.61
1552274_at	20.8351	42.4278
1552275_s_at	17.274	18.8211
1552276_a_at	47.2123	51.9746
1552277_a_at	260.397	319.997
1552278_a_at	487.306	660.4
1552279_a_at	728.72	733.735
1552280_at	1.21497	5.78249
1552281_at	121.766	194.643
1552283_s_at	19.3226	32.9551
1552286_at	30.9316	66.5983
1552287_s_at	233.598	259.74
1552288_at	9.54645	11.4827
1552289_a_at	24.9974	13.1958
1552291_at	127.23	211.567
1552293_at	3.16201	3.38456
1552295_a_at	198.517	190.995
1552296_at	15.0413	18.6625
1552299_at	39.0378	64.2831
1552301_a_at	25.7508	38.5112
1552302_at	12.8143	15.0566
1552303_a_at	27.6197	28.1644
1552304_at	18.7019	14.6906
1552306_at	69.0536	30.7788
1552307_a_at	28.4784	32.2335
1552309_a_at	29.6666	10.6368
1552310_at	313.578	367.479
1552311_a_at	36.2364	18.6784
1552312_a_at	149.465	142.421
1552314_a_at	28.5148	23.0929
1552315_at	8.11468	7.59144
1552316_a_at	0.585998	1.34846
1552318_at	0.837195	0.452755
1552319_a_at	55.4612	365.949
1552320_a_at	16.0126	0.889392
1552321_a_at	3.26781	5.5084
1552322_at	0.839692	20.4719
1552323_s_at	22.4282	31.5373
1552325_at	1.85896	0.88617
1552326_a_at	1.06692	2.70434
1552327_at	23.7982	24.5282
1552329_at	116.727	171.994
1552330_at	317.235	390.583
1552332_at	52.3759	78.6935
1552334_at	97.4837	79.2527
1552335_at	23.9238	20.7469
1552337_s_at	25.7369	37.2558
1552338_at	0.991919	1.54087
1552340_at	3.92048	0.901424
1552343_s_at	51.3842	20.5433
1552344_s_at	151.872	125.237
1552347_at	121.679	110.158
1552348_at	31.5324	23.6016
1552349_a_at	2.79028	1.68018
1552354_at	2.24051	5.05203
1552355_s_at	8.64878	10.5517
1552359_at	6.47674	9.79116
1552360_a_at	53.7903	85.5268
1552362_a_at	53.7943	61.8117
1552364_s_at	84.8029	42.4089
1552365_at	97.2769	32.139
1552367_a_at	37.1107	23.87
1552368_at	10.823	10.233
1552370_at	84.017	69.4563
1552372_at	2.70077	0.258743
1552373_s_at	0.440969	2.36906
1552375_at	10.6344	8.05634
1552377_s_at	77.6121	69.8319
1552378_s_at	76.8476	43.9467
1552379_at	17.0391	2.89696
1552381_at	24.3265	19.9328
1552383_at	25.4784	20.2323
1552384_a_at	14.736	9.76577
1552386_at	0.292555	6.68955
1552388_at	2.27252	2.96969
1552389_at	27.4422	25.8303
1552390_a_at	51.5263	64.2368
1552391_at	0.958279	13.4186
1552393_at	0.768686	10.1939
1552394_a_at	4.47226	1.27988
1552395_at	9.50933	14.8233
1552396_at	0.829035	1.81063
1552398_a_at	5.95561	1.50053
1552399_a_at	59.7021	48.5369
1552400_a_at	119.431	105.976
1552401_a_at	7.3871	16.6379
1552402_at	0.967728	14.9714
1552405_at	11.0274	4.95974
1552408_at	14.5936	13.9584
1552409_a_at	19.1342	4.88142
1552410_at	27.0222	43.4086
1552411_at	3.3897	4.44767
1552412_a_at	1.62302	2.3709
1552414_at	3.55582	13.4814
1552415_a_at	17.2271	28.1939
1552417_a_at	77.4026	120.782
1552418_at	5.96454	1.603
1552419_s_at	12.5928	16.4538
1552421_a_at	0.995969	1.83545
1552422_at	53.7417	72.8331
1552423_at	47.6418	52.5697
1552424_at	1.31715	0.628462
1552425_a_at	23.2536	4.25257
1552426_a_at	561.535	553.835
1552427_at	17.2814	24.336
1552430_at	8.23416	10.254
1552432_at	3.55528	5.38267
1552436_a_at	23.8944	19.3233
1552438_a_at	0.895233	8.02277
1552439_s_at	0.792795	2.15944
1552440_at	9.58818	17.7947
1552445_a_at	0.325242	20.8592
1552448_a_at	0.58869	8.07294
1552449_a_at	0.686875	0.494103
1552450_a_at	4.86653	2.50255
1552452_at	1.34253	1.69968
1552453_a_at	0.835644	1.01186
1552455_at	5.94112	8.74933
1552456_a_at	5.57173	21.183
1552457_a_at	1.29931	1.33095
1552458_at	6.85372	17.4538
1552459_a_at	2.79777	1.74032
1552461_at	1.68766	9.86082
1552463_at	1.55594	8.8118
1552466_x_at	5.95328	5.25227
1552467_at	3.37971	8.00098
1552468_a_at	26.6983	41.772
1552470_a_at	51.3603	59.805
1552472_a_at	154.187	249.77
1552473_at	81.1621	159.55
1552474_a_at	191.794	136.782
1552476_s_at	105.253	153.684
1552477_a_at	258.467	289.622
1552478_a_at	58.3508	60.6095
1552480_s_at	0.356056	0.196232
1552481_s_at	17.6669	21.5116
1552482_at	2.46278	11.7874
1552484_at	6.87873	30.5626
1552485_at	80.5778	72.1307
1552486_s_at	74.492	88.7736
1552487_a_at	0.25158	0.804911
1552489_s_at	11.6269	25.3107
1552490_at	7.47103	18.3993
1552491_at	18.6048	6.37063
1552493_s_at	2.78384	3.50004
1552494_at	1.45048	3.82338
1552496_a_at	141.942	152.529
1552497_a_at	9.3379	27.2701
1552498_at	21.9307	28.5954
1552499_a_at	21.4463	12.4291
1552501_a_at	4.08882	3.2771
1552502_s_at	1.45288	2.27096
1552503_at	17.4962	12.7064
1552504_a_at	93.6574	131.947
1552506_at	8.92551	12.2879
1552507_at	3.6038	16.4242
1552508_at	0.763547	15.6455
1552509_a_at	3.80488	1.40984
1552510_at	33.4815	133.199
1552511_a_at	1.73534	1.69905
1552514_at	8.34901	4.67266
1552515_at	11.7639	3.71908
1552516_a_at	87.7386	71.4005
1552518_s_at	6.90233	12.9769
1552519_at	38.4904	64.7822
1552520_at	21.638	10.1821
1552521_a_at	9.92842	9.4206
1552522_at	5.75436	11.6136
1552523_a_at	5.47983	2.48394
1552524_at	17.1673	51.292
1552526_at	0.998866	2.1252
1552528_at	14.5746	24.5839
1552531_a_at	0.478258	9.12923
1552532_a_at	254.478	257.472
1552535_at	87.2121	56.5523
1552536_at	2.44503	12.6471
1552538_a_at	1.04584	0.917388
1552540_s_at	13.5972	14.173
1552541_at	31.072	81.301
1552542_s_at	6.80777	8.72369
1552543_a_at	17.8905	22.0762
1552544_at	1.46088	23.6281
1552546_a_at	9.23277	5.42548
1552548_at	0.794492	13.1599
1552549_a_at	18.5742	20.8998
1552552_s_at	5.9404	14.0256
1552553_a_at	1.74543	9.09652
1552554_a_at	7.22406	5.94397
1552555_at	10.8359	35.0964
1552557_a_at	1.07202	6.13194
1552558_a_at	32.9614	31.7247
1552559_a_at	9.02717	2.29412
1552562_at	9.77804	20.7699
1552563_a_at	1.97857	3.20488
1552564_at	1.4696	0.652168
1552566_at	1.01011	2.68077
1552568_at	4.5379	8.65903
1552569_a_at	0.594606	1.40033
1552570_at	17.1561	13.5745
1552572_a_at	11.7107	16.8334
1552573_s_at	12.6375	21.7862
1552575_a_at	37.3465	56.1731
1552576_at	2.12274	1.4281
1552578_a_at	0.654903	0.554361
1552579_a_at	15.2133	4.00634
1552580_at	114.096	149.429
1552582_at	12.8437	1.36427
1552583_s_at	1.43958	14.3391
1552584_at	12.7929	28.4916
1552585_s_at	1.5953	12.5722
1552586_at	21.9183	19.2465
1552587_at	9.45413	7.36317
1552588_a_at	0.378094	0.284109
1552590_a_at	10.7877	11.151
1552592_at	4.93605	0.425847
1552594_at	3.24514	23.7249
1552596_at	3.90437	11.7171
1552598_at	10.9067	5.48963
1552599_at	8.59052	19.2242
1552602_at	16.7916	49.246
1552604_at	11.1016	20.7371
1552605_s_at	6.43151	2.74382
1552607_at	1.33442	12.7994
1552608_at	1.37818	17.486
1552609_s_at	8.83152	21.7362
1552610_a_at	131.867	128.873
1552611_a_at	76.2198	92.8227
1552612_at	198.212	223.092
1552613_s_at	225.035	153.832
1552615_at	72.7757	63.1203
1552616_a_at	14.7264	12.3234
1552617_a_at	430.799	395.373
1552618_at	130.276	171.724
1552619_a_at	993.729	1133.84
1552620_at	19.5137	15.8061
1552621_at	382.306	408.366
1552622_s_at	168.53	165.854
1552623_at	12.0223	7.44919
1552625_a_at	195.211	220.317
1552626_a_at	135.909	123.787
1552627_a_at	106.473	140.625
1552628_a_at	522.786	448.682
1552629_a_at	0.954535	10.7036
1552630_a_at	30.963	36.7083
1552631_a_at	26.5557	25.7345
1552632_a_at	28.072	57.108
1552633_at	38.3115	42.8012
1552634_a_at	52.5976	66.5494
1552637_at	9.82976	2.04962
1552639_at	2.93204	23.3557
1552641_s_at	227.946	153.253
1552643_at	24.535	4.931
1552644_a_at	48.5408	57.7556
1552646_at	47.3878	63.9522
1552648_a_at	43.3883	32.9702
1552649_a_at	23.8505	36.8221
1552651_a_at	69.3367	75.3853
1552652_at	52.2661	58.5999
1552656_s_at	34.9967	58.1776
1552657_a_at	3.65745	1.28313
1552658_a_at	8.1347	4.3876
1552660_a_at	163.332	272.477
1552661_at	7.56378	9.80244
1552662_a_at	26.0694	20.6994
1552663_a_at	177.755	155.751
1552664_at	324.659	406.821
1552665_at	47.8316	59.5761
1552666_a_at	5.80818	0.460119
1552667_a_at	12.0608	7.80384
1552669_at	11.5895	8.9452
1552670_a_at	80.0438	129.531
1552671_a_at	41.293	47.2483
1552672_a_at	13.7251	26.1483
1552673_at	2.46064	0.439699
1552674_at	1.38513	8.68313
1552675_at	5.37309	10.4455
1552676_at	15.3733	47.0273
1552677_a_at	43.6584	83.3737
1552678_a_at	159.568	185.766
1552680_a_at	73.652	55.8727
1552682_a_at	47.594	33.3107
1552684_a_at	24.3571	41.5661
1552685_a_at	173.858	353.746
1552686_at	7.60398	2.41465
1552687_a_at	0.910922	3.16912
1552689_at	45.5552	47.8402
1552690_a_at	21.4693	13.5323
1552691_at	34.6414	53.1144
1552693_at	2.24817	1.19234
1552694_at	0.592219	11.5862
1552695_a_at	15.3173	25.7066
1552696_at	22.2668	36.3012
1552698_at	14.1969	9.94561
1552701_a_at	8.03447	1.12074
1552703_s_at	11.1071	8.57629
1552705_at	4.64959	8.02815
1552708_a_at	9.48509	15.45
1552711_a_at	99.3384	70.1863
1552712_a_at	131.339	100.374
1552713_a_at	4.82325	7.88977
1552714_at	28.131	73.0832
1552715_a_at	0.399489	6.37391
1552716_at	50.6243	72.8298
1552717_s_at	13.1176	15.4879
1552718_at	10.5001	2.41704
1552719_at	15.461	15.1472
1552721_a_at	1.47139	1.48496
1552722_at	4.62552	11.779
1552724_at	19.8858	3.8263
1552725_s_at	4.51095	2.56975
1552726_at	39.0246	26.1281
1552727_s_at	60.2213	55.4649
1552729_at	115.762	168.299
1552730_at	0.584947	1.23694
1552731_at	2.14861	4.5907
1552732_at	4.81107	10.2928
1552733_at	12.0054	19.7022
1552734_at	1.2819	15.5376
1552735_at	81.2053	47.0183
1552736_a_at	1.64161	2.76844
1552737_s_at	68.3286	43.0598
1552738_a_at	18.489	33.8113
1552739_s_at	52.8012	67.7756
1552740_at	27.119	27.2628
1552742_at	0.902899	12.1726
1552743_at	2.99786	6.71114
1552745_at	0.955072	9.88081
1552747_a_at	0.114515	4.20198
1552749_a_at	6.365	5.8503
1552750_at	0.902444	7.81482
1552751_a_at	17.2523	20.3891
1552752_a_at	17.1235	16.8441
1552754_a_at	0.328713	0.618126
1552755_at	28.6263	20.357
1552757_s_at	0.547185	17.8094
1552758_at	0.828807	3.70665
1552760_at	2.98582	0.276235
1552761_at	13.1523	11.8494
1552763_at	5.61619	1.09859
1552765_x_at	15.7989	8.45934
1552766_at	287.727	351.076
1552767_a_at	1520.28	1340.85
1552768_at	3.47644	1.08603
1552769_at	13.4586	34.4463
1552770_s_at	10.5022	14.3859
1552771_a_at	1.94267	10.3421
1552772_at	7.21927	16.1498
1552773_at	3.15766	8.37807
1552774_a_at	3.56957	22.5749
1552775_at	16.3144	5.38062
1552777_a_at	0.683114	7.64642
1552779_a_at	17.6185	20.7386
1552782_at	19.1278	16.6853
1552783_at	8.29682	11.1091
1552785_at	38.1207	12.1136
1552787_at	1.892	12.8435
1552788_a_at	40.3319	8.19428
1552789_at	55.5382	59.4146
1552790_a_at	117.724	136.79
1552791_a_at	9.99421	5.84732
1552792_at	43.4737	55.036
1552793_at	145.464	97.4856
1552794_a_at	23.7785	27.5067
1552796_a_at	5.30768	13.2438
1552797_s_at	155.229	128.661
1552798_a_at	2.67268	0.914123
1552799_at	2.45038	4.01799
1552800_at	7.6074	103.742
1552801_at	2.56501	2.09534
1552803_a_at	16.7002	53.0313
1552804_a_at	96.8176	86.0298
1552806_a_at	1.02078	8.96658
1552807_a_at	9.21128	2.62381
1552808_at	0.647202	7.05991
1552809_at	1.14933	8.44957
1552811_at	4.83784	9.83091
1552812_a_at	99.2017	121.016
1552813_at	7.8654	2.88649
1552814_a_at	24.8668	21.2938
1552816_at	14.1854	8.44543
1552818_a_at	0.993797	1.38146
1552819_at	0.543922	0.955532
1552822_at	9.69388	10.5509
1552825_at	1.31166	0.644243
1552826_at	3.47416	2.29547
1552827_s_at	13.0316	11.5167
1552828_at	15.3356	18.2041
1552829_at	12.9442	0.68333
1552830_at	13.2127	1.68688
1552833_at	21.217	1.20961
1552834_at	7.84643	13.351
1552835_at	14.9742	0.337781
1552836_at	31.5044	54.725
1552837_at	1.28816	3.24381
1552839_at	9.31191	3.19531
1552841_s_at	0.443047	3.19389
1552842_at	8.07608	3.03338
1552843_at	0.622524	5.70241
1552845_at	151.481	148.625
1552846_s_at	20.2104	60.6842
1552848_a_at	19.5145	29.2537
1552849_at	2.21414	1.8374
1552851_at	0.180217	10.7202
1552852_a_at	1.6127	20.6973
1552853_at	1.03762	2.15121
1552854_a_at	4.4493	1.02505
1552856_at	10.757	14.232
1552857_a_at	2.98226	2.85431
1552858_at	0.476795	2.09953
1552860_at	1.89815	4.498
1552862_at	47.1063	46.6797
1552863_a_at	85.3662	120.518
1552865_a_at	17.1258	5.28696
1552867_at	27.6913	26.2332
1552868_at	24.5661	25.8478
1552870_s_at	2.49157	9.65138
1552872_at	3.9604	3.36835
1552873_s_at	54.4436	84.6133
1552875_a_at	9.93901	0.871891
1552876_at	12.8492	7.56655
1552877_s_at	10.8675	3.81501
1552878_at	5.31249	13.2832
1552879_a_at	22.3055	24.5428
1552880_at	0.406337	16.1473
1552882_a_at	13.0426	7.9933
1552884_at	17.763	25.2436
1552885_a_at	26.7804	45.2207
1552887_at	14.1632	21.9677
1552889_a_at	48.898	96.47
1552890_a_at	2.33447	3.57968
1552892_at	32.5309	16.0008
1552893_at	7.38351	42.8193
[truncated: 54,222 more rows]

## Sheet: GSE46451
!Series_title	Effects of Inflammation and 5-ASA on ex vivo cultured ulcerative colitis biopsies
[truncated: 47,298 more rows]

[truncated: 1 more sheets: GSE31106]
